# Supplementary material for: The dipolar endofullerene HF@C60
Source: Springer Nature journal article supplement (doi:10.1038/nchem.2563), 2016-07-11
Supplement: 41557_2016_BFnchem2563_MOESM42_ESM.cif [file 41557_2016_BFnchem2563_MOESM42_ESM.cif]

data_2016sot0001_r_100k
_audit_creation_date              2016-01-13
_audit_creation_method
;
Olex2 1.2-alpha
(compiled 2015.11.10 svn.r3248 for OlexSys, GUI svn.r5133)
;
loop_
  _publ_author_name
  _publ_author_email
  _publ_author_address
 'Light, M.E.' light@soton.ac.uk
;
University Road Highfield
Southampton
;
 'Alom, S.' sa1c14@soton.ac.uk
;
University Road Highfield
Southampton
;
 'Whitby, R.' R.J.Whitby@soton.ac.uk
;
University Road Highfield
Southampton
;

_publ_contact_author_address
;
University Road Highfield
Southampton
;
_publ_contact_author_email        light@soton.ac.uk
_publ_contact_author_name         'Light, M.E.'
_publ_contact_author_phone        02380599429
_publ_section_references
;
Dolomanov, O.V., Bourhis, L.J., Gildea, R.J, Howard, J.A.K. & Puschmann, H.
 (2009), J. Appl. Cryst. 42, 339-341.

Sheldrick, G.M. (2008). Acta Cryst. A64, 112-122.

Sheldrick, G.M. (2015). Acta Cryst. C71, 3-8.
;
_chemical_name_common             ?
_chemical_name_systematic         ?
_chemical_formula_moiety          '2(C60), 3(C S2), 2(HF)'
_chemical_formula_sum             'C123 H2 F2 S6'
_chemical_formula_weight          1709.61
_chemical_melting_point           ?
loop_
  _atom_type_symbol
  _atom_type_description
  _atom_type_scat_dispersion_real
  _atom_type_scat_dispersion_imag
  _atom_type_scat_source
 'C' 'C' 0.0033 0.0016 'International Tables Vol C Tables 4.2.6.8 and 6.1.1.4'
 'H' 'H' 0.0000 0.0000 'International Tables Vol C Tables 4.2.6.8 and 6.1.1.4'
 'F' 'F' 0.0171 0.0103 'International Tables Vol C Tables 4.2.6.8 and 6.1.1.4'
 'S' 'S' 0.1246 0.1234 'International Tables Vol C Tables 4.2.6.8 and 6.1.1.4'

_shelx_space_group_comment
;
The symmetry employed for this shelxl refinement is uniquely defined
by the following loop, which should always be used as a source of
symmetry information in preference to the above space-group names.
They are only intended as comments.
;
_space_group_crystal_system       'monoclinic'
_space_group_IT_number            14
_space_group_name_H-M_alt         'P 1 21/n 1'
_space_group_name_Hall            '-P 2yn'
loop_
  _space_group_symop_operation_xyz
 'x, y, z'
 '-x+1/2, y+1/2, -z+1/2'
 '-x, -y, -z'
 'x-1/2, -y-1/2, z-1/2'

_cell_length_a                    9.8867(6)
_cell_length_b                    25.5100(12)
_cell_length_c                    24.7353(14)
_cell_angle_alpha                 90
_cell_angle_beta                  90.22(2)
_cell_angle_gamma                 90
_cell_volume                      6238.4(6)
_cell_formula_units_Z             4
_cell_measurement_reflns_used     7838
_cell_measurement_temperature     100(2)
_cell_measurement_theta_max       30.3030
_cell_measurement_theta_min       2.2360
_shelx_estimated_absorpt_T_max    ?
_shelx_estimated_absorpt_T_min    ?
_exptl_absorpt_coefficient_mu     0.302
_exptl_absorpt_correction_T_max   1.00000
_exptl_absorpt_correction_T_min   0.32187
_exptl_absorpt_correction_type    multi-scan
_exptl_absorpt_process_details
'CrysAlisPro 1.171.38.41 (Rigaku Oxford Diffraction, 2015) Empirical absorption correction using spherical harmonics, implemented in SCALE3 ABSPACK scaling algorithm.'
_exptl_absorpt_special_details    ?
_exptl_crystal_colour             'metallic dark orange'
_exptl_crystal_colour_lustre      metallic
_exptl_crystal_colour_modifier    dark
_exptl_crystal_colour_primary     orange
_exptl_crystal_density_diffrn     1.820
_exptl_crystal_density_meas       ?
_exptl_crystal_density_method     ?
_exptl_crystal_description        plate
_exptl_crystal_F_000              3416
_exptl_crystal_preparation        ?
_exptl_crystal_recrystallization_method
'The material was recrystallised from carbon disulfide by slow evaporation'
_exptl_crystal_size_max           0.2
_exptl_crystal_size_mid           0.05
_exptl_crystal_size_min           0.02
_exptl_transmission_factor_max    ?
_exptl_transmission_factor_min    ?
_diffrn_reflns_av_R_equivalents   0.1079
_diffrn_reflns_av_unetI/netI      0.1424
_diffrn_reflns_Laue_measured_fraction_full 0.998
_diffrn_reflns_Laue_measured_fraction_max 0.991
_diffrn_reflns_limit_h_max        7
_diffrn_reflns_limit_h_min        -13
_diffrn_reflns_limit_k_max        34
_diffrn_reflns_limit_k_min        -26
_diffrn_reflns_limit_l_max        33
_diffrn_reflns_limit_l_min        -21
_diffrn_reflns_number             34980
_diffrn_reflns_point_group_measured_fraction_full 0.998
_diffrn_reflns_point_group_measured_fraction_max 0.991
_diffrn_reflns_theta_full         26.000
_diffrn_reflns_theta_max          28.699
_diffrn_reflns_theta_min          2.942
_diffrn_ambient_temperature       100(2)
_diffrn_detector                  'CCD area detector'
_diffrn_detector_area_resol_mean  28.5714
_diffrn_detector_type             'Rigaku HG Saturn724+ (2x2 bin mode)'
_diffrn_measured_fraction_theta_full 0.998
_diffrn_measured_fraction_theta_max 0.991
_diffrn_measurement_details
;
List of Runs (angles in degrees, time in seconds):

  # Type    Start    End  Width  t~exp~   \w     \q     \k     \f   Frames
--------------------------------------------------------------------------
  1  \w   -109.00  20.00   1.00   20.00    --  -19.00 -72.00  90.00  129
  2  \w    -93.00   7.00   1.00   20.00    --  -19.00 -36.00  30.00  100
;
_diffrn_measurement_device        'four-circle \k diffractometer'
_diffrn_measurement_device_type   'Rigaku AFC12 FRE-VHF'
_diffrn_measurement_device_type2  'Rigaku AFC12 (Right)'
_diffrn_measurement_method        'profile data from \w-scans'
_diffrn_measurement_specimen_support 'MiTeGen MicroMesh'
_diffrn_orient_matrix_type
'CrysAlisPro convention (1999,Acta A55,543-557)'
_diffrn_orient_matrix_UB_11       -0.0009178000
_diffrn_orient_matrix_UB_12       -0.0219942000
_diffrn_orient_matrix_UB_13       0.0175033000
_diffrn_orient_matrix_UB_21       0.0088327000
_diffrn_orient_matrix_UB_22       -0.0169107000
_diffrn_orient_matrix_UB_23       -0.0225059000
_diffrn_orient_matrix_UB_31       0.0711785000
_diffrn_orient_matrix_UB_32       0.0017974000
_diffrn_orient_matrix_UB_33       0.0031524000
_diffrn_radiation_collimation     0.3
_diffrn_radiation_monochromator   'Confocal mirrors, VHF Varimax'
_diffrn_radiation_probe           x-ray
_diffrn_radiation_type            MoK\a
_diffrn_radiation_wavelength      0.71073
_diffrn_source                    'Rotating Anode'
_diffrn_source_current            55.0
_diffrn_source_power              2.475
_diffrn_source_target             Mo
_diffrn_source_type               'Rotating Anode'
_diffrn_source_voltage            45.0
_diffrn_special_details           ?
_reflns_Friedel_coverage          0.000
_reflns_Friedel_fraction_full     .
_reflns_Friedel_fraction_max      .
_reflns_number_gt                 7541
_reflns_number_total              13735
_reflns_odcompleteness_completeness 92.56
_reflns_odcompleteness_iscentric  1
_reflns_odcompleteness_theta      30.71
_reflns_special_details
;
 Reflections were merged by SHELXL according to the crystal
 class for the calculation of statistics and refinement.
 
 _reflns_Friedel_fraction is defined as the number of unique
 Friedel pairs measured divided by the number that would be
 possible theoretically, ignoring centric projections and
 systematic absences.
;
_reflns_threshold_expression      'I > 2\s(I)'
_computing_cell_refinement        'CrysAlisPro 1.171.38.41 (Rigaku OD, 2015)'
_computing_data_collection
'CrystalClear-SM Expert 3.1 b27 (Rigaku, 2013)'
_computing_data_reduction         'CrysAlisPro 1.171.38.41 (Rigaku OD, 2015)'
_computing_molecular_graphics     'Olex2 (Dolomanov et al., 2009)'
_computing_publication_material   'Olex2 (Dolomanov et al., 2009)'
_computing_structure_refinement   'ShelXL (Sheldrick, 2015)'
_computing_structure_solution     'ShelXS (Sheldrick, 2008)'
_refine_diff_density_max          0.485
_refine_diff_density_min          -0.694
_refine_diff_density_rms          0.099
_refine_ls_extinction_coef        .
_refine_ls_extinction_method      none
_refine_ls_goodness_of_fit_ref    1.017
_refine_ls_hydrogen_treatment     undef
_refine_ls_matrix_type            full
_refine_ls_number_parameters      1181
_refine_ls_number_reflns          13735
_refine_ls_number_restraints      1647
_refine_ls_R_factor_all           0.1682
_refine_ls_R_factor_gt            0.0878
_refine_ls_restrained_S_all       1.018
_refine_ls_shift/su_max           0.000
_refine_ls_shift/su_mean          0.000
_refine_ls_structure_factor_coef  Fsqd
_refine_ls_weighting_details
'w=1/[\s^2^(Fo^2^)+(0.1058P)^2^+2.6236P] where P=(Fo^2^+2Fc^2^)/3'
_refine_ls_weighting_scheme       calc
_refine_ls_wR_factor_gt           0.1911
_refine_ls_wR_factor_ref          0.2368
_refine_special_details
;
The crystal was refined as a pseudo-merohedral twin [monoclinic with beta close to 90, - 1 0 0, 0 -1 0 0 0 1, BASF=0.3634(15)). The Shelx rigid body restraint, RIGU, was applied to all atoms with default esds.
The H atoms associated with the HF are included in the formula, but not the crystallographic model.
As part of the data collection, the unit cell was identified as orthorhombic and mmm symmetry was used for the subsequent data collection strategy. At the structure solution stage the true symmetry was found to be monoclinic 2/m and as a result there are a number of missing reflections.
;
_olex2_refinement_description
;
1. Twinned data refinement
 Scales: 0.6366(15) 0.3634(15)
2. Rigid body (RIGU) restrains
 All non-hydrogen atoms
 with sigma for 1-2 distances of 0.004 and sigma for 1-3 distances of 0.004
;
_atom_sites_solution_hydrogens    .
_atom_sites_solution_primary      ?
_atom_sites_solution_secondary    ?
loop_
  _atom_site_label
  _atom_site_type_symbol
  _atom_site_fract_x
  _atom_site_fract_y
  _atom_site_fract_z
  _atom_site_U_iso_or_equiv
  _atom_site_adp_type
  _atom_site_occupancy
  _atom_site_site_symmetry_order
  _atom_site_calc_flag
  _atom_site_refinement_flags_posn
  _atom_site_refinement_flags_adp
  _atom_site_refinement_flags_occupancy
  _atom_site_disorder_assembly
  _atom_site_disorder_group
 C1A C 0.9633(7) 0.6148(2) 0.7115(3) 0.0324(13) Uani 1 1 d . U . . .
 C2A C 0.9737(7) 0.5798(2) 0.7576(2) 0.0311(13) Uani 1 1 d . U . . .
 C3A C 0.8472(7) 0.5824(2) 0.7864(2) 0.0308(13) Uani 1 1 d . U . . .
 C4A C 0.7597(7) 0.6188(2) 0.7592(2) 0.0327(12) Uani 1 1 d . U . . .
 C5A C 0.8275(7) 0.6391(2) 0.7130(3) 0.0332(13) Uani 1 1 d . U . . .
 C6A C 0.7635(7) 0.64892(19) 0.6648(2) 0.0328(13) Uani 1 1 d . U . . .
 C7A C 0.8215(7) 0.6343(2) 0.6131(3) 0.0325(13) Uani 1 1 d . U . . .
 C8A C 0.9447(7) 0.6104(2) 0.6124(3) 0.0354(14) Uani 1 1 d . U . . .
 C9A C 1.0191(7) 0.6009(2) 0.6627(3) 0.0318(13) Uani 1 1 d . U . . .
 C10A C 1.0893(6) 0.5509(2) 0.6569(3) 0.0299(13) Uani 1 1 d . U . . .
 C11A C 1.0987(6) 0.5175(2) 0.7010(3) 0.0298(13) Uani 1 1 d . U . . .
 C12A C 1.0398(6) 0.5321(2) 0.7526(2) 0.0294(13) Uani 1 1 d . U . . .
 C13A C 0.9837(7) 0.4848(2) 0.7769(2) 0.0294(13) Uani 1 1 d . U . . .
 C14A C 0.8637(7) 0.4879(2) 0.8048(2) 0.0324(13) Uani 1 1 d . U . . .
 C15A C 0.7928(7) 0.5377(2) 0.8098(2) 0.0327(13) Uani 1 1 d . U . . .
 C16A C 0.6508(7) 0.5275(2) 0.8061(2) 0.0308(13) Uani 1 1 d . U . . .
 C17A C 0.5669(7) 0.5632(2) 0.7811(2) 0.0327(13) Uani 1 1 d . U . . .
 C18A C 0.6205(7) 0.6094(2) 0.7564(3) 0.0329(13) Uani 1 1 d . U . . .
 C19A C 0.5477(7) 0.6198(2) 0.7055(2) 0.0319(13) Uani 1 1 d . U . . .
 C20A C 0.6161(7) 0.6391(2) 0.6618(3) 0.0328(13) Uani 1 1 d . U . . .
 C21A C 0.5859(7) 0.6185(2) 0.6081(3) 0.0328(13) Uani 1 1 d . U . . .
 C22A C 0.7126(7) 0.6161(2) 0.5783(2) 0.0341(13) Uani 1 1 d . U . . .
 C23A C 0.7371(8) 0.5734(2) 0.5436(2) 0.0314(12) Uani 1 1 d . U . . .
 C24A C 0.8684(7) 0.5491(2) 0.5426(2) 0.0315(13) Uani 1 1 d . U . . .
 C25A C 0.9712(7) 0.5674(2) 0.5762(3) 0.0353(14) Uani 1 1 d . U . . .
 C26A C 1.0599(6) 0.5298(2) 0.6037(2) 0.0302(13) Uani 1 1 d . U . . .
 C27A C 1.0422(7) 0.4773(2) 0.5968(3) 0.0330(14) Uani 1 1 d . U . . .
 C28A C 1.0527(7) 0.4418(2) 0.6433(3) 0.0321(13) Uani 1 1 d . U . . .
 C29A C 1.0797(7) 0.4616(2) 0.6933(3) 0.0310(13) Uani 1 1 d . U . . .
 C30A C 1.0089(6) 0.4413(2) 0.7401(2) 0.0294(13) Uani 1 1 d . U . . .
 C31A C 0.9117(7) 0.4027(2) 0.7337(2) 0.0321(13) Uani 1 1 d . U . . .
 C32A C 0.7845(7) 0.4051(2) 0.7627(2) 0.0329(13) Uani 1 1 d . U . . .
 C33A C 0.7604(8) 0.4471(2) 0.7982(2) 0.0327(13) Uani 1 1 d . U . . .
 C34A C 0.6306(8) 0.4719(2) 0.7989(2) 0.0327(13) Uani 1 1 d . U . . .
 C35A C 0.5261(7) 0.4531(2) 0.7650(2) 0.0315(13) Uani 1 1 d . U . . .
 C36A C 0.4385(7) 0.4908(3) 0.7374(3) 0.0356(14) Uani 1 1 d . U . . .
 C37A C 0.4573(7) 0.5443(2) 0.7447(3) 0.0340(14) Uani 1 1 d . U . . .
 C38A C 0.4480(7) 0.5797(2) 0.6986(2) 0.0302(13) Uani 1 1 d . U . . .
 C39A C 0.4193(6) 0.5599(2) 0.6474(3) 0.0298(13) Uani 1 1 d . U . . .
 C40A C 0.4904(7) 0.5801(2) 0.6013(2) 0.0316(13) Uani 1 1 d . U . . .
 C41A C 0.5160(7) 0.5365(2) 0.5648(2) 0.0334(13) Uani 1 1 d . U . . .
 C42A C 0.6358(7) 0.5332(2) 0.5371(2) 0.0322(13) Uani 1 1 d . U . . .
 C43A C 0.7053(7) 0.4837(2) 0.5318(2) 0.0318(13) Uani 1 1 d . U . . .
 C44A C 0.8480(7) 0.4933(2) 0.5351(2) 0.0323(13) Uani 1 1 d . U . . .
 C45A C 0.9326(7) 0.4574(2) 0.5616(2) 0.0312(13) Uani 1 1 d . U . . .
 C46A C 0.8776(7) 0.4112(2) 0.5854(2) 0.0302(13) Uani 1 1 d . U . . .
 C47A C 0.9494(7) 0.4014(2) 0.6357(3) 0.0322(13) Uani 1 1 d . U . . .
 C48A C 0.8813(7) 0.3821(2) 0.6804(2) 0.0317(13) Uani 1 1 d . U . . .
 C49A C 0.7377(8) 0.3721(2) 0.6766(2) 0.0344(13) Uani 1 1 d . U . . .
 C50A C 0.6782(7) 0.3866(2) 0.7280(3) 0.0332(13) Uani 1 1 d . U . . .
 C51A C 0.5491(7) 0.4103(2) 0.7291(2) 0.0314(13) Uani 1 1 d . U . . .
 C52A C 0.4775(7) 0.4205(2) 0.6792(3) 0.0324(13) Uani 1 1 d . U . . .
 C53A C 0.4103(6) 0.4698(2) 0.6844(3) 0.0324(13) Uani 1 1 d . U . . .
 C54A C 0.4013(7) 0.5035(2) 0.6397(3) 0.0328(14) Uani 1 1 d . U . . .
 C55A C 0.4615(7) 0.4888(2) 0.5891(2) 0.0316(13) Uani 1 1 d . U . . .
 C56A C 0.5262(6) 0.4411(2) 0.5841(2) 0.0278(12) Uani 1 1 d . U . . .
 C57A C 0.6527(7) 0.4384(2) 0.5548(2) 0.0297(13) Uani 1 1 d . U . . .
 C58A C 0.7415(8) 0.4018(2) 0.5819(2) 0.0329(12) Uani 1 1 d . U . . .
 C59A C 0.6687(7) 0.3819(2) 0.6289(3) 0.0325(13) Uani 1 1 d . U . . .
 C60A C 0.5350(7) 0.4066(2) 0.6303(3) 0.0321(13) Uani 1 1 d . U . . .
 C1B C 0.4666(8) 0.8905(3) 0.6238(3) 0.0424(15) Uani 1 1 d . U . . .
 C2B C 0.4006(8) 0.8539(3) 0.6591(3) 0.0431(15) Uani 1 1 d . U . . .
 C3B C 0.2605(9) 0.8728(3) 0.6690(2) 0.0452(15) Uani 1 1 d . U . . .
 C4B C 0.2452(9) 0.9209(2) 0.6389(3) 0.0437(14) Uani 1 1 d . U . . .
 C5B C 0.3711(8) 0.9330(2) 0.6101(3) 0.0436(15) Uani 1 1 d . U . . .
 C6B C 0.3696(9) 0.9544(3) 0.5601(3) 0.0483(16) Uani 1 1 d . U . . .
 C7B C 0.4607(8) 0.9355(3) 0.5193(3) 0.0460(15) Uani 1 1 d . U . . .
 C8B C 0.5522(8) 0.8949(3) 0.5318(3) 0.0463(16) Uani 1 1 d . U . . .
 C9B C 0.5555(8) 0.8723(3) 0.5842(3) 0.0420(15) Uani 1 1 d . U . . .
 C10B C 0.5794(7) 0.8164(3) 0.5788(3) 0.0400(15) Uani 1 1 d . U . . .
 C11B C 0.5168(8) 0.7819(3) 0.6132(3) 0.0421(15) Uani 1 1 d . U . . .
 C12B C 0.4233(8) 0.8010(3) 0.6541(3) 0.0414(15) Uani 1 1 d . U . . .
 C13B C 0.3158(9) 0.7639(3) 0.6581(3) 0.0474(16) Uani 1 1 d . U . . .
 C14B C 0.1844(9) 0.7826(3) 0.6667(3) 0.0480(16) Uani 1 1 d . U . . .
 C15B C 0.1587(8) 0.8376(3) 0.6726(3) 0.0442(15) Uani 1 1 d . U . . .
 C16B C 0.0285(8) 0.8494(3) 0.6460(3) 0.0444(15) Uani 1 1 d . U . . .
 C17B C 0.0131(7) 0.8954(3) 0.6181(3) 0.0406(15) Uani 1 1 d . U . . .
 C18B C 0.1237(8) 0.9318(3) 0.6142(3) 0.0432(15) Uani 1 1 d . U . . .
 C19B C 0.1225(8) 0.9556(2) 0.5596(3) 0.0421(15) Uani 1 1 d . U . . .
 C20B C 0.2398(9) 0.9659(2) 0.5326(3) 0.0469(15) Uani 1 1 d . U . . .
 C21B C 0.2549(9) 0.9543(2) 0.4766(3) 0.0453(15) Uani 1 1 d . U . . .
 C22B C 0.3889(8) 0.9347(3) 0.4664(3) 0.0456(15) Uani 1 1 d . U . . .
 C23B C 0.4114(8) 0.8952(3) 0.4305(3) 0.0477(16) Uani 1 1 d . U . . .
 C24B C 0.5052(8) 0.8533(3) 0.4427(3) 0.0480(17) Uani 1 1 d . U . . .
 C25B C 0.5732(7) 0.8532(3) 0.4903(3) 0.0423(15) Uani 1 1 d . U . . .
 C26B C 0.5900(7) 0.8044(3) 0.5214(3) 0.0412(15) Uani 1 1 d . U . . .
 C27B C 0.5408(8) 0.7590(3) 0.5017(3) 0.0491(16) Uani 1 1 d . U . . .
 C28B C 0.4727(8) 0.7224(3) 0.5372(3) 0.0454(15) Uani 1 1 d . U . . .
 C29B C 0.4605(8) 0.7329(3) 0.5912(3) 0.0441(15) Uani 1 1 d . U . . .
 C30B C 0.3348(8) 0.7219(2) 0.6195(3) 0.0439(16) Uani 1 1 d . U . . .
 C31B C 0.2291(9) 0.7004(2) 0.5912(3) 0.0462(15) Uani 1 1 d . U . . .
 C32B C 0.0940(8) 0.7201(3) 0.6007(3) 0.0481(16) Uani 1 1 d . U . . .
 C33B C 0.0700(9) 0.7585(3) 0.6373(3) 0.0482(16) Uani 1 1 d . U . . .
 C34B C -0.0248(8) 0.8003(3) 0.6252(3) 0.0496(17) Uani 1 1 d . U . . .
 C35B C -0.0926(8) 0.8008(3) 0.5760(3) 0.0451(16) Uani 1 1 d . U . . .
 C36B C -0.1073(7) 0.8504(3) 0.5457(3) 0.0439(16) Uani 1 1 d . U . . .
 C37B C -0.0587(8) 0.8963(3) 0.5657(3) 0.0432(15) Uani 1 1 d . U . . .
 C38B C 0.0081(8) 0.9323(2) 0.5310(3) 0.0423(15) Uani 1 1 d . U . . .
 C39B C 0.0201(7) 0.9218(2) 0.4761(3) 0.0388(14) Uani 1 1 d . U . . .
 C40B C 0.1457(8) 0.9326(2) 0.4487(3) 0.0438(16) Uani 1 1 d . U . . .
 C41B C 0.1671(8) 0.8903(3) 0.4102(2) 0.0409(15) Uani 1 1 d . U . . .
 C42B C 0.2964(8) 0.8720(3) 0.4013(3) 0.0473(16) Uani 1 1 d . U . . .
 C43B C 0.3217(8) 0.8170(3) 0.3961(3) 0.0434(15) Uani 1 1 d . U . . .
 C44B C 0.4532(8) 0.8051(3) 0.4223(3) 0.0447(15) Uani 1 1 d . U . . .
 C45B C 0.4674(8) 0.7592(3) 0.4496(3) 0.0428(15) Uani 1 1 d . U . . .
 C46B C 0.3570(8) 0.7225(3) 0.4532(3) 0.0457(15) Uani 1 1 d . U . . .
 C47B C 0.3572(9) 0.6989(2) 0.5075(3) 0.0464(15) Uani 1 1 d . U . . .
 C48B C 0.2400(9) 0.6884(2) 0.5346(3) 0.0449(15) Uani 1 1 d . U . . .
 C49B C 0.1102(8) 0.7004(2) 0.5073(3) 0.0449(16) Uani 1 1 d . U . . .
 C50B C 0.0200(8) 0.7189(3) 0.5476(3) 0.0468(16) Uani 1 1 d . U . . .
 C51B C -0.0706(7) 0.7593(3) 0.5362(3) 0.0415(15) Uani 1 1 d . U . . .
 C52B C -0.0726(7) 0.7823(3) 0.4832(3) 0.0395(15) Uani 1 1 d . U . . .
 C53B C -0.0970(7) 0.8385(3) 0.4883(3) 0.0378(15) Uani 1 1 d . U . . .
 C54B C -0.0328(8) 0.8730(3) 0.4548(3) 0.0423(15) Uani 1 1 d . U . . .
 C55B C 0.0567(8) 0.8537(3) 0.4137(2) 0.0412(15) Uani 1 1 d . U . . .
 C56B C 0.0818(8) 0.7998(3) 0.4085(2) 0.0387(15) Uani 1 1 d . U . . .
 C57B C 0.2193(8) 0.7816(2) 0.3993(2) 0.0386(14) Uani 1 1 d . U . . .
 C58B C 0.2358(9) 0.7335(2) 0.4286(3) 0.0439(14) Uani 1 1 d . U . . .
 C59B C 0.1087(8) 0.7213(2) 0.4574(3) 0.0410(15) Uani 1 1 d . U . . .
 C60B C 0.0136(8) 0.7633(3) 0.4436(3) 0.0413(15) Uani 1 1 d . U . . .
 S5 S 0.4508(2) 0.74651(7) 0.28003(8) 0.0442(5) Uani 1 1 d . U . . .
 S6 S 0.1437(2) 0.74267(7) 0.25525(10) 0.0601(6) Uani 1 1 d . U . . .
 C3 C 0.2989(8) 0.7447(2) 0.2666(3) 0.0388(15) Uani 1 1 d . U . . .
 S3 S 0.2431(2) 0.56743(7) 0.86580(7) 0.0462(5) Uani 1 1 d . U . . .
 S4 S 0.2675(3) 0.66968(8) 0.80087(13) 0.0864(9) Uani 1 1 d . U . . .
 C2 C 0.2535(8) 0.6184(2) 0.8349(3) 0.0418(16) Uani 1 1 d . U . . .
 S1 S 0.2168(2) 0.31441(8) 0.68879(8) 0.0557(6) Uani 1 1 d . U . . .
 S2 S 0.2505(2) 0.33906(7) 0.56728(7) 0.0454(4) Uani 1 1 d . U . . .
 C1 C 0.2354(7) 0.3258(2) 0.6276(3) 0.0365(14) Uani 1 1 d . U . . .
 F1B F 0.2416(5) 0.82702(15) 0.53354(16) 0.0570(11) Uani 1 1 d . U . . .
 F1A F 0.7505(5) 0.51069(15) 0.67068(15) 0.0561(11) Uani 1 1 d . U . . .

loop_
  _atom_site_aniso_label
  _atom_site_aniso_U_11
  _atom_site_aniso_U_22
  _atom_site_aniso_U_33
  _atom_site_aniso_U_23
  _atom_site_aniso_U_13
  _atom_site_aniso_U_12
 C1A 0.039(3) 0.022(3) 0.036(3) -0.010(2) -0.008(2) -0.008(2)
 C2A 0.032(3) 0.034(3) 0.027(3) -0.010(2) -0.006(2) -0.001(2)
 C3A 0.044(3) 0.029(3) 0.020(3) -0.012(2) -0.005(2) 0.002(2)
 C4A 0.048(3) 0.021(2) 0.029(3) -0.011(2) 0.001(3) 0.004(2)
 C5A 0.050(3) 0.015(2) 0.034(3) -0.007(2) -0.005(2) -0.001(2)
 C6A 0.050(3) 0.009(2) 0.039(3) 0.0049(19) 0.000(2) -0.002(2)
 C7A 0.047(3) 0.019(3) 0.031(3) 0.008(2) 0.003(2) -0.003(2)
 C8A 0.042(3) 0.027(3) 0.037(3) 0.010(2) 0.006(2) -0.008(2)
 C9A 0.037(3) 0.022(2) 0.036(3) 0.005(2) 0.004(2) -0.014(2)
 C10A 0.028(3) 0.030(3) 0.032(3) 0.001(2) 0.005(2) -0.009(2)
 C11A 0.026(3) 0.032(3) 0.032(3) -0.003(2) -0.005(2) -0.002(2)
 C12A 0.028(3) 0.034(3) 0.026(3) -0.004(2) -0.012(2) -0.001(2)
 C13A 0.034(3) 0.037(3) 0.017(2) 0.001(2) -0.013(2) 0.004(2)
 C14A 0.045(3) 0.035(3) 0.017(3) 0.004(2) -0.007(2) 0.002(2)
 C15A 0.053(3) 0.034(3) 0.010(2) -0.006(2) -0.005(2) 0.001(2)
 C16A 0.046(3) 0.036(3) 0.009(3) -0.005(2) 0.006(2) 0.000(2)
 C17A 0.044(3) 0.032(3) 0.023(3) -0.009(2) 0.009(2) 0.004(2)
 C18A 0.043(3) 0.027(3) 0.029(3) -0.009(2) 0.006(2) 0.010(2)
 C19A 0.042(3) 0.023(3) 0.032(3) -0.007(2) 0.004(2) 0.014(2)
 C20A 0.043(3) 0.020(3) 0.036(3) -0.001(2) -0.001(2) 0.013(2)
 C21A 0.048(3) 0.016(2) 0.034(3) 0.004(2) -0.002(2) 0.011(2)
 C22A 0.053(3) 0.022(2) 0.028(3) 0.010(2) -0.002(2) 0.001(2)
 C23A 0.052(3) 0.032(2) 0.010(2) 0.0117(19) -0.005(3) 0.004(2)
 C24A 0.043(3) 0.034(3) 0.017(3) 0.009(2) 0.006(2) -0.004(2)
 C25A 0.040(3) 0.038(3) 0.028(3) 0.004(2) 0.009(2) -0.006(2)
 C26A 0.024(3) 0.035(3) 0.032(3) 0.000(2) 0.012(2) -0.003(2)
 C27A 0.032(3) 0.036(3) 0.030(3) -0.002(2) 0.007(3) 0.004(2)
 C28A 0.032(3) 0.031(3) 0.033(3) -0.004(2) 0.004(2) 0.014(2)
 C29A 0.032(3) 0.030(3) 0.031(3) -0.001(2) -0.004(2) 0.008(2)
 C30A 0.031(3) 0.030(3) 0.027(3) 0.006(2) -0.011(2) 0.010(2)
 C31A 0.049(3) 0.024(3) 0.024(3) 0.011(2) -0.002(2) 0.003(2)
 C32A 0.053(3) 0.022(2) 0.024(3) 0.011(2) -0.002(2) -0.002(2)
 C33A 0.052(3) 0.031(2) 0.014(2) 0.0119(19) -0.003(3) -0.002(2)
 C34A 0.052(3) 0.036(3) 0.010(3) 0.008(2) 0.007(2) -0.004(2)
 C35A 0.036(3) 0.034(3) 0.025(3) 0.008(2) 0.011(2) -0.007(2)
 C36A 0.033(3) 0.043(3) 0.031(3) 0.000(2) 0.013(3) -0.004(2)
 C37A 0.036(3) 0.038(3) 0.028(3) -0.002(2) 0.012(2) 0.002(2)
 C38A 0.031(3) 0.030(3) 0.030(3) -0.004(2) 0.006(2) 0.011(2)
 C39A 0.026(3) 0.033(3) 0.030(3) 0.003(2) -0.005(2) 0.008(2)
 C40A 0.037(3) 0.030(3) 0.027(3) 0.005(2) -0.003(2) 0.011(2)
 C41A 0.041(3) 0.041(3) 0.018(3) -0.001(2) -0.008(2) 0.004(2)
 C42A 0.047(3) 0.036(3) 0.014(3) -0.001(2) -0.005(2) 0.005(2)
 C43A 0.044(3) 0.039(3) 0.012(3) -0.005(2) 0.000(2) 0.002(2)
 C44A 0.045(3) 0.037(3) 0.014(3) 0.000(2) 0.010(2) 0.002(2)
 C45A 0.041(3) 0.033(3) 0.020(3) -0.010(2) 0.008(2) 0.005(2)
 C46A 0.046(3) 0.025(3) 0.020(3) -0.010(2) 0.004(2) 0.007(2)
 C47A 0.041(3) 0.023(3) 0.033(3) -0.007(2) -0.001(2) 0.012(2)
 C48A 0.048(3) 0.015(2) 0.032(3) 0.000(2) -0.004(2) 0.009(2)
 C49A 0.055(3) 0.015(2) 0.033(3) 0.001(2) -0.004(2) -0.002(2)
 C50A 0.053(3) 0.013(2) 0.034(3) 0.006(2) -0.004(2) -0.006(2)
 C51A 0.042(3) 0.024(2) 0.029(3) 0.008(2) 0.006(2) -0.010(2)
 C52A 0.031(3) 0.029(3) 0.037(3) 0.002(2) 0.002(2) -0.014(2)
 C53A 0.027(3) 0.036(3) 0.034(3) -0.001(2) 0.003(2) -0.008(2)
 C54A 0.034(4) 0.037(3) 0.027(3) -0.001(2) -0.002(3) -0.002(2)
 C55A 0.034(3) 0.037(3) 0.024(3) -0.006(2) -0.006(3) -0.004(2)
 C56A 0.029(3) 0.030(3) 0.024(3) -0.009(2) -0.009(2) -0.008(2)
 C57A 0.041(3) 0.030(3) 0.018(3) -0.009(2) -0.003(2) -0.002(2)
 C58A 0.054(3) 0.019(2) 0.025(3) -0.010(2) -0.001(3) 0.000(2)
 C59A 0.050(3) 0.017(3) 0.030(3) -0.005(2) -0.006(2) -0.004(2)
 C60A 0.041(3) 0.023(3) 0.033(3) -0.007(2) -0.004(2) -0.012(2)
 C1B 0.049(4) 0.039(3) 0.039(3) -0.018(2) -0.013(3) -0.011(3)
 C2B 0.061(4) 0.043(3) 0.025(3) -0.009(2) -0.014(3) -0.003(3)
 C3B 0.068(4) 0.051(3) 0.017(3) -0.016(2) -0.001(3) 0.004(3)
 C4B 0.061(3) 0.034(3) 0.036(3) -0.020(2) -0.006(3) -0.001(3)
 C5B 0.056(4) 0.029(3) 0.046(3) -0.016(2) -0.007(3) -0.010(3)
 C6B 0.061(4) 0.025(3) 0.058(3) -0.004(3) 0.000(3) -0.014(3)
 C7B 0.051(4) 0.026(3) 0.061(3) 0.007(2) 0.006(3) -0.023(2)
 C8B 0.038(4) 0.041(3) 0.059(3) -0.004(2) 0.000(3) -0.014(3)
 C9B 0.039(4) 0.043(3) 0.045(3) -0.006(2) -0.010(3) -0.007(3)
 C10B 0.024(3) 0.045(3) 0.051(3) 0.000(2) -0.008(3) 0.005(3)
 C11B 0.046(4) 0.044(3) 0.036(3) 0.003(2) -0.017(3) 0.008(3)
 C12B 0.059(4) 0.045(3) 0.020(3) 0.004(2) -0.015(3) 0.008(3)
 C13B 0.073(4) 0.043(3) 0.026(3) 0.019(2) -0.007(3) 0.005(3)
 C14B 0.074(4) 0.052(3) 0.019(3) 0.010(3) 0.003(3) 0.000(3)
 C15B 0.061(4) 0.053(3) 0.019(3) -0.001(3) 0.005(3) 0.007(3)
 C16B 0.045(4) 0.059(3) 0.029(3) -0.005(2) 0.016(3) 0.007(3)
 C17B 0.044(4) 0.046(3) 0.031(3) -0.013(2) 0.010(3) 0.017(3)
 C18B 0.060(3) 0.032(3) 0.037(3) -0.020(2) 0.004(3) 0.013(3)
 C19B 0.063(3) 0.017(3) 0.046(3) -0.011(2) 0.004(3) 0.016(2)
 C20B 0.063(3) 0.018(3) 0.059(3) -0.003(2) 0.001(3) -0.004(3)
 C21B 0.064(3) 0.017(2) 0.055(3) 0.013(2) 0.000(3) -0.003(3)
 C22B 0.059(4) 0.028(3) 0.051(3) 0.020(2) 0.012(3) -0.014(3)
 C23B 0.060(4) 0.044(3) 0.039(3) 0.018(2) 0.017(3) -0.011(3)
 C24B 0.053(4) 0.053(3) 0.039(3) 0.007(3) 0.011(3) -0.003(3)
 C25B 0.031(4) 0.048(3) 0.048(3) 0.003(2) 0.007(3) -0.005(3)
 C26B 0.020(3) 0.050(3) 0.054(3) -0.001(2) 0.002(3) 0.012(2)
 C27B 0.053(4) 0.047(3) 0.047(3) -0.004(2) 0.006(3) 0.016(3)
 C28B 0.051(4) 0.035(3) 0.050(3) -0.001(2) -0.001(3) 0.021(3)
 C29B 0.055(4) 0.034(3) 0.044(3) 0.007(2) -0.010(3) 0.011(3)
 C30B 0.065(4) 0.026(3) 0.041(3) 0.016(2) -0.005(3) 0.006(3)
 C31B 0.066(4) 0.020(3) 0.052(3) 0.016(2) -0.002(3) 0.000(3)
 C32B 0.060(4) 0.034(3) 0.050(3) 0.020(2) 0.009(3) -0.013(3)
 C33B 0.060(4) 0.050(3) 0.034(3) 0.015(2) 0.013(3) -0.012(3)
 C34B 0.055(4) 0.058(3) 0.035(3) 0.005(3) 0.013(3) -0.003(3)
 C35B 0.043(4) 0.052(3) 0.040(3) 0.002(2) 0.013(3) -0.005(3)
 C36B 0.032(4) 0.052(3) 0.047(3) -0.001(2) 0.004(3) 0.001(3)
 C37B 0.041(4) 0.045(3) 0.044(3) -0.005(2) 0.002(3) 0.014(3)
 C38B 0.047(4) 0.032(3) 0.048(3) -0.001(2) 0.002(3) 0.023(3)
 C39B 0.043(3) 0.032(3) 0.041(3) 0.008(2) -0.006(3) 0.013(2)
 C40B 0.055(3) 0.029(3) 0.048(3) 0.015(2) 0.002(3) 0.003(3)
 C41B 0.061(3) 0.044(3) 0.018(3) 0.017(2) -0.003(3) 0.003(3)
 C42B 0.063(3) 0.049(3) 0.030(3) 0.015(3) 0.011(3) 0.003(3)
 C43B 0.059(4) 0.051(3) 0.020(3) -0.001(2) 0.013(3) 0.005(3)
 C44B 0.048(4) 0.057(3) 0.030(3) -0.004(2) 0.022(3) 0.002(3)
 C45B 0.050(4) 0.046(3) 0.033(3) -0.009(2) 0.014(3) 0.016(3)
 C46B 0.063(4) 0.034(3) 0.040(3) -0.016(2) 0.004(3) 0.014(3)
 C47B 0.065(4) 0.024(3) 0.051(3) -0.007(3) 0.000(3) 0.013(3)
 C48B 0.065(4) 0.016(3) 0.054(3) 0.002(2) -0.002(3) 0.001(3)
 C49B 0.066(4) 0.019(3) 0.050(3) -0.001(2) -0.005(3) -0.012(3)
 C50B 0.057(4) 0.025(3) 0.059(3) 0.006(2) 0.003(3) -0.015(3)
 C51B 0.035(4) 0.043(3) 0.047(3) 0.001(2) 0.003(3) -0.018(3)
 C52B 0.034(4) 0.039(3) 0.046(3) -0.003(2) -0.007(3) -0.012(3)
 C53B 0.031(4) 0.043(3) 0.039(3) -0.001(2) -0.008(3) 0.001(3)
 C54B 0.046(4) 0.042(3) 0.039(3) 0.006(2) -0.009(3) 0.007(3)
 C55B 0.057(4) 0.046(3) 0.020(3) 0.003(2) -0.009(3) 0.005(3)
 C56B 0.051(3) 0.045(3) 0.020(3) -0.006(2) -0.011(3) -0.002(2)
 C57B 0.060(3) 0.046(3) 0.011(3) -0.010(2) 0.001(3) 0.002(2)
 C58B 0.067(3) 0.034(3) 0.031(3) -0.016(2) -0.006(3) 0.003(3)
 C59B 0.060(4) 0.026(3) 0.037(3) -0.010(2) -0.009(3) -0.012(3)
 C60B 0.049(4) 0.040(3) 0.034(3) -0.011(2) -0.012(3) -0.012(3)
 S5 0.0565(12) 0.0355(9) 0.0408(10) 0.0012(8) 0.0090(10) 0.0011(9)
 S6 0.0751(15) 0.0305(9) 0.0744(15) 0.0168(9) -0.0304(13) -0.0141(10)
 C3 0.068(4) 0.020(3) 0.028(3) 0.001(2) -0.010(3) -0.012(3)
 S3 0.0569(13) 0.0478(9) 0.0339(9) -0.0054(7) -0.0043(10) -0.0031(10)
 S4 0.0749(18) 0.0440(11) 0.140(2) 0.0250(13) -0.0091(19) -0.0006(12)
 C2 0.036(4) 0.041(3) 0.049(4) -0.014(3) 0.002(4) 0.007(3)
 S1 0.0664(15) 0.0519(11) 0.0488(11) 0.0138(9) -0.0014(11) 0.0139(10)
 S2 0.0512(11) 0.0452(9) 0.0399(9) -0.0098(8) 0.0048(11) -0.0063(10)
 C1 0.029(4) 0.030(3) 0.050(3) -0.008(2) -0.005(3) 0.003(3)
 F1B 0.065(3) 0.052(2) 0.054(2) -0.0012(19) 0.003(3) 0.006(2)
 F1A 0.069(3) 0.056(2) 0.044(2) -0.0038(18) -0.003(3) 0.004(2)

_geom_special_details
;
 All esds (except the esd in the dihedral angle between two l.s. planes)
 are estimated using the full covariance matrix.  The cell esds are taken
 into account individually in the estimation of esds in distances, angles
 and torsion angles; correlations between esds in cell parameters are only
 used when they are defined by crystal symmetry.  An approximate (isotropic)
 treatment of cell esds is used for estimating esds involving l.s. planes.
;
loop_
  _geom_bond_atom_site_label_1
  _geom_bond_atom_site_label_2
  _geom_bond_distance
  _geom_bond_site_symmetry_2
  _geom_bond_publ_flag
 C1A C2A 1.450(9) . ?
 C1A C5A 1.479(9) . ?
 C1A C9A 1.375(9) . ?
 C2A C3A 1.443(9) . ?
 C2A C12A 1.388(8) . ?
 C3A C4A 1.435(8) . ?
 C3A C15A 1.387(9) . ?
 C4A C5A 1.425(9) . ?
 C4A C18A 1.398(10) . ?
 C5A C6A 1.371(9) . ?
 C6A C7A 1.451(9) . ?
 C6A C20A 1.481(10) . ?
 C7A C8A 1.363(10) . ?
 C7A C22A 1.452(9) . ?
 C8A C9A 1.464(9) . ?
 C8A C25A 1.440(9) . ?
 C9A C10A 1.461(8) . ?
 C10A C11A 1.386(8) . ?
 C10A C26A 1.449(9) . ?
 C11A C12A 1.454(9) . ?
 C11A C29A 1.450(8) . ?
 C12A C13A 1.457(8) . ?
 C13A C14A 1.377(9) . ?
 C13A C30A 1.458(8) . ?
 C14A C15A 1.457(8) . ?
 C14A C33A 1.468(9) . ?
 C15A C16A 1.430(10) . ?
 C16A C17A 1.376(9) . ?
 C16A C34A 1.443(8) . ?
 C17A C18A 1.432(9) . ?
 C17A C37A 1.488(10) . ?
 C18A C19A 1.471(9) . ?
 C19A C20A 1.368(9) . ?
 C19A C38A 1.431(9) . ?
 C20A C21A 1.459(9) . ?
 C21A C22A 1.456(10) . ?
 C21A C40A 1.370(9) . ?
 C22A C23A 1.410(8) . ?
 C23A C24A 1.438(9) . ?
 C23A C42A 1.441(9) . ?
 C24A C25A 1.392(10) . ?
 C24A C44A 1.450(8) . ?
 C25A C26A 1.466(9) . ?
 C26A C27A 1.363(8) . ?
 C27A C28A 1.466(8) . ?
 C27A C45A 1.477(9) . ?
 C28A C29A 1.362(8) . ?
 C28A C47A 1.463(9) . ?
 C29A C30A 1.450(9) . ?
 C30A C31A 1.384(9) . ?
 C31A C32A 1.452(9) . ?
 C31A C48A 1.449(9) . ?
 C32A C33A 1.405(8) . ?
 C32A C50A 1.434(9) . ?
 C33A C34A 1.432(10) . ?
 C34A C35A 1.412(9) . ?
 C35A C36A 1.462(9) . ?
 C35A C51A 1.426(8) . ?
 C36A C37A 1.388(9) . ?
 C36A C53A 1.441(9) . ?
 C37A C38A 1.457(8) . ?
 C38A C39A 1.392(8) . ?
 C39A C40A 1.437(9) . ?
 C39A C54A 1.462(8) . ?
 C40A C41A 1.455(8) . ?
 C41A C42A 1.373(9) . ?
 C41A C55A 1.461(9) . ?
 C42A C43A 1.445(8) . ?
 C43A C44A 1.434(10) . ?
 C43A C57A 1.390(8) . ?
 C44A C45A 1.401(9) . ?
 C45A C46A 1.427(8) . ?
 C46A C47A 1.452(9) . ?
 C46A C58A 1.369(10) . ?
 C47A C48A 1.385(9) . ?
 C48A C49A 1.446(10) . ?
 C49A C50A 1.452(9) . ?
 C49A C59A 1.382(9) . ?
 C50A C51A 1.412(10) . ?
 C51A C52A 1.445(9) . ?
 C52A C53A 1.429(9) . ?
 C52A C60A 1.386(9) . ?
 C53A C54A 1.403(9) . ?
 C54A C55A 1.439(9) . ?
 C55A C56A 1.380(8) . ?
 C56A C57A 1.449(9) . ?
 C56A C60A 1.446(8) . ?
 C57A C58A 1.444(9) . ?
 C58A C59A 1.461(9) . ?
 C59A C60A 1.465(10) . ?
 C1B C2B 1.438(10) . ?
 C1B C5B 1.476(10) . ?
 C1B C9B 1.398(10) . ?
 C2B C3B 1.489(11) . ?
 C2B C12B 1.373(9) . ?
 C3B C4B 1.443(9) . ?
 C3B C15B 1.352(10) . ?
 C4B C5B 1.468(11) . ?
 C4B C18B 1.374(11) . ?
 C5B C6B 1.351(10) . ?
 C6B C7B 1.440(11) . ?
 C6B C20B 1.479(11) . ?
 C7B C8B 1.408(10) . ?
 C7B C22B 1.486(11) . ?
 C8B C9B 1.419(10) . ?
 C8B C25B 1.493(10) . ?
 C9B C10B 1.452(9) . ?
 C10B C11B 1.374(10) . ?
 C10B C26B 1.456(10) . ?
 C11B C12B 1.457(10) . ?
 C11B C29B 1.471(10) . ?
 C12B C13B 1.427(11) . ?
 C13B C14B 1.401(11) . ?
 C13B C30B 1.448(10) . ?
 C14B C15B 1.432(10) . ?
 C14B C33B 1.477(11) . ?
 C15B C16B 1.475(11) . ?
 C16B C17B 1.370(9) . ?
 C16B C34B 1.453(10) . ?
 C17B C18B 1.438(10) . ?
 C17B C37B 1.477(10) . ?
 C18B C19B 1.481(10) . ?
 C19B C20B 1.366(11) . ?
 C19B C38B 1.458(10) . ?
 C20B C21B 1.424(10) . ?
 C21B C22B 1.439(11) . ?
 C21B C40B 1.394(10) . ?
 C22B C23B 1.363(10) . ?
 C23B C24B 1.447(10) . ?
 C23B C42B 1.468(11) . ?
 C24B C25B 1.354(10) . ?
 C24B C44B 1.424(10) . ?
 C25B C26B 1.474(10) . ?
 C26B C27B 1.348(10) . ?
 C27B C28B 1.448(11) . ?
 C27B C45B 1.477(11) . ?
 C28B C29B 1.369(10) . ?
 C28B C47B 1.481(11) . ?
 C29B C30B 1.457(11) . ?
 C30B C31B 1.369(10) . ?
 C31B C32B 1.447(11) . ?
 C31B C48B 1.439(10) . ?
 C32B C33B 1.357(10) . ?
 C32B C50B 1.500(11) . ?
 C33B C34B 1.448(11) . ?
 C34B C35B 1.386(10) . ?
 C35B C36B 1.480(10) . ?
 C35B C51B 1.463(10) . ?
 C36B C37B 1.358(9) . ?
 C36B C53B 1.454(10) . ?
 C37B C38B 1.422(10) . ?
 C38B C39B 1.388(10) . ?
 C39B C40B 1.443(10) . ?
 C39B C54B 1.450(9) . ?
 C40B C41B 1.455(10) . ?
 C41B C42B 1.379(11) . ?
 C41B C55B 1.439(10) . ?
 C42B C43B 1.431(10) . ?
 C43B C44B 1.482(11) . ?
 C43B C57B 1.360(10) . ?
 C44B C45B 1.357(10) . ?
 C45B C46B 1.442(11) . ?
 C46B C47B 1.472(10) . ?
 C46B C58B 1.371(11) . ?
 C47B C48B 1.368(11) . ?
 C48B C49B 1.480(11) . ?
 C49B C50B 1.421(11) . ?
 C49B C59B 1.343(10) . ?
 C50B C51B 1.394(10) . ?
 C51B C52B 1.434(10) . ?
 C52B C53B 1.460(9) . ?
 C52B C60B 1.389(10) . ?
 C53B C54B 1.367(10) . ?
 C54B C55B 1.438(10) . ?
 C55B C56B 1.402(9) . ?
 C56B C57B 1.455(10) . ?
 C56B C60B 1.442(10) . ?
 C57B C58B 1.434(9) . ?
 C58B C59B 1.480(11) . ?
 C59B C60B 1.466(10) . ?
 S5 C3 1.538(8) . ?
 S6 C3 1.560(8) . ?
 S3 C2 1.512(7) . ?
 S4 C2 1.562(7) . ?
 S1 C1 1.553(7) . ?
 S2 C1 1.537(7) . ?

loop_
  _geom_angle_atom_site_label_1
  _geom_angle_atom_site_label_2
  _geom_angle_atom_site_label_3
  _geom_angle
  _geom_angle_site_symmetry_1
  _geom_angle_site_symmetry_3
  _geom_angle_publ_flag
 C2A C1A C5A 107.4(6) . . ?
 C9A C1A C2A 120.2(6) . . ?
 C9A C1A C5A 119.8(6) . . ?
 C3A C2A C1A 107.6(6) . . ?
 C12A C2A C1A 120.2(6) . . ?
 C12A C2A C3A 119.5(6) . . ?
 C4A C3A C2A 108.6(6) . . ?
 C15A C3A C2A 120.5(6) . . ?
 C15A C3A C4A 119.6(6) . . ?
 C5A C4A C3A 109.1(6) . . ?
 C18A C4A C3A 120.3(6) . . ?
 C18A C4A C5A 119.2(6) . . ?
 C4A C5A C1A 107.3(5) . . ?
 C6A C5A C1A 118.1(6) . . ?
 C6A C5A C4A 123.2(6) . . ?
 C5A C6A C7A 122.5(6) . . ?
 C5A C6A C20A 117.6(6) . . ?
 C7A C6A C20A 107.7(5) . . ?
 C6A C7A C22A 108.1(6) . . ?
 C8A C7A C6A 118.8(6) . . ?
 C8A C7A C22A 120.6(6) . . ?
 C7A C8A C9A 120.6(6) . . ?
 C7A C8A C25A 121.0(6) . . ?
 C25A C8A C9A 108.1(6) . . ?
 C1A C9A C8A 120.1(6) . . ?
 C1A C9A C10A 120.2(6) . . ?
 C10A C9A C8A 107.3(5) . . ?
 C11A C10A C9A 119.4(6) . . ?
 C11A C10A C26A 119.9(5) . . ?
 C26A C10A C9A 108.6(5) . . ?
 C10A C11A C12A 120.5(6) . . ?
 C10A C11A C29A 119.6(5) . . ?
 C29A C11A C12A 108.4(5) . . ?
 C2A C12A C11A 119.5(6) . . ?
 C2A C12A C13A 120.6(6) . . ?
 C11A C12A C13A 107.7(5) . . ?
 C12A C13A C30A 107.8(5) . . ?
 C14A C13A C12A 119.3(6) . . ?
 C14A C13A C30A 120.4(6) . . ?
 C13A C14A C15A 120.6(6) . . ?
 C13A C14A C33A 120.3(6) . . ?
 C15A C14A C33A 107.1(6) . . ?
 C3A C15A C14A 119.5(6) . . ?
 C3A C15A C16A 120.3(6) . . ?
 C16A C15A C14A 108.0(6) . . ?
 C15A C16A C34A 108.8(6) . . ?
 C17A C16A C15A 119.9(6) . . ?
 C17A C16A C34A 120.8(6) . . ?
 C16A C17A C18A 120.9(6) . . ?
 C16A C17A C37A 119.6(5) . . ?
 C18A C17A C37A 106.1(5) . . ?
 C4A C18A C17A 119.0(6) . . ?
 C4A C18A C19A 119.4(6) . . ?
 C17A C18A C19A 109.5(6) . . ?
 C20A C19A C18A 119.9(6) . . ?
 C20A C19A C38A 120.3(6) . . ?
 C38A C19A C18A 107.9(5) . . ?
 C19A C20A C6A 120.7(6) . . ?
 C19A C20A C21A 119.4(6) . . ?
 C21A C20A C6A 107.7(6) . . ?
 C22A C21A C20A 107.6(6) . . ?
 C40A C21A C20A 120.5(6) . . ?
 C40A C21A C22A 120.1(6) . . ?
 C7A C22A C21A 108.9(5) . . ?
 C23A C22A C7A 118.7(6) . . ?
 C23A C22A C21A 119.4(6) . . ?
 C22A C23A C24A 120.0(6) . . ?
 C22A C23A C42A 119.7(6) . . ?
 C24A C23A C42A 108.6(5) . . ?
 C23A C24A C44A 107.4(6) . . ?
 C25A C24A C23A 120.2(6) . . ?
 C25A C24A C44A 120.4(6) . . ?
 C8A C25A C26A 108.6(6) . . ?
 C24A C25A C8A 119.5(6) . . ?
 C24A C25A C26A 119.5(6) . . ?
 C10A C26A C25A 107.3(5) . . ?
 C27A C26A C10A 120.2(6) . . ?
 C27A C26A C25A 120.6(6) . . ?
 C26A C27A C28A 120.0(6) . . ?
 C26A C27A C45A 120.3(6) . . ?
 C28A C27A C45A 107.4(5) . . ?
 C29A C28A C27A 119.8(6) . . ?
 C29A C28A C47A 120.8(6) . . ?
 C47A C28A C27A 106.8(5) . . ?
 C11A C29A C30A 108.0(5) . . ?
 C28A C29A C11A 120.5(6) . . ?
 C28A C29A C30A 119.9(6) . . ?
 C29A C30A C13A 108.1(5) . . ?
 C31A C30A C13A 119.5(6) . . ?
 C31A C30A C29A 120.0(5) . . ?
 C30A C31A C32A 121.1(6) . . ?
 C30A C31A C48A 120.2(6) . . ?
 C48A C31A C32A 106.8(6) . . ?
 C33A C32A C31A 119.4(6) . . ?
 C33A C32A C50A 119.9(6) . . ?
 C50A C32A C31A 108.9(5) . . ?
 C32A C33A C14A 119.4(6) . . ?
 C32A C33A C34A 119.9(6) . . ?
 C34A C33A C14A 107.9(5) . . ?
 C33A C34A C16A 108.3(6) . . ?
 C35A C34A C16A 120.5(6) . . ?
 C35A C34A C33A 119.8(6) . . ?
 C34A C35A C36A 119.0(6) . . ?
 C34A C35A C51A 120.7(6) . . ?
 C51A C35A C36A 108.0(6) . . ?
 C37A C36A C35A 120.4(6) . . ?
 C37A C36A C53A 120.6(6) . . ?
 C53A C36A C35A 107.0(5) . . ?
 C36A C37A C17A 119.6(6) . . ?
 C36A C37A C38A 120.0(6) . . ?
 C38A C37A C17A 108.5(6) . . ?
 C19A C38A C37A 108.0(6) . . ?
 C39A C38A C19A 120.4(6) . . ?
 C39A C38A C37A 119.9(5) . . ?
 C38A C39A C40A 119.6(6) . . ?
 C38A C39A C54A 119.9(5) . . ?
 C40A C39A C54A 108.0(5) . . ?
 C21A C40A C39A 119.8(6) . . ?
 C21A C40A C41A 120.1(6) . . ?
 C39A C40A C41A 107.8(5) . . ?
 C40A C41A C55A 108.4(5) . . ?
 C42A C41A C40A 120.5(6) . . ?
 C42A C41A C55A 118.4(6) . . ?
 C23A C42A C43A 107.5(6) . . ?
 C41A C42A C23A 120.1(6) . . ?
 C41A C42A C43A 120.7(6) . . ?
 C44A C43A C42A 108.2(6) . . ?
 C57A C43A C42A 120.7(6) . . ?
 C57A C43A C44A 119.3(6) . . ?
 C43A C44A C24A 108.2(6) . . ?
 C45A C44A C24A 120.0(6) . . ?
 C45A C44A C43A 120.0(6) . . ?
 C44A C45A C27A 119.2(6) . . ?
 C44A C45A C46A 120.3(6) . . ?
 C46A C45A C27A 108.7(5) . . ?
 C45A C46A C47A 108.1(6) . . ?
 C58A C46A C45A 119.6(6) . . ?
 C58A C46A C47A 120.2(6) . . ?
 C46A C47A C28A 109.1(5) . . ?
 C48A C47A C28A 119.3(6) . . ?
 C48A C47A C46A 120.4(6) . . ?
 C47A C48A C31A 119.8(6) . . ?
 C47A C48A C49A 119.4(6) . . ?
 C49A C48A C31A 108.9(6) . . ?
 C48A C49A C50A 107.4(5) . . ?
 C59A C49A C48A 120.3(6) . . ?
 C59A C49A C50A 120.0(6) . . ?
 C32A C50A C49A 108.1(6) . . ?
 C51A C50A C32A 120.5(6) . . ?
 C51A C50A C49A 119.8(6) . . ?
 C35A C51A C52A 108.3(5) . . ?
 C50A C51A C35A 119.1(6) . . ?
 C50A C51A C52A 120.0(6) . . ?
 C53A C52A C51A 108.0(5) . . ?
 C60A C52A C51A 119.9(6) . . ?
 C60A C52A C53A 119.8(6) . . ?
 C52A C53A C36A 108.7(6) . . ?
 C54A C53A C36A 120.0(6) . . ?
 C54A C53A C52A 119.8(6) . . ?
 C53A C54A C39A 119.6(6) . . ?
 C53A C54A C55A 120.1(6) . . ?
 C55A C54A C39A 108.6(5) . . ?
 C54A C55A C41A 107.2(5) . . ?
 C56A C55A C41A 121.7(6) . . ?
 C56A C55A C54A 120.1(6) . . ?
 C55A C56A C57A 119.2(6) . . ?
 C55A C56A C60A 119.5(6) . . ?
 C60A C56A C57A 108.4(6) . . ?
 C43A C57A C56A 119.3(6) . . ?
 C43A C57A C58A 119.9(6) . . ?
 C58A C57A C56A 108.9(5) . . ?
 C46A C58A C57A 120.8(6) . . ?
 C46A C58A C59A 119.7(6) . . ?
 C57A C58A C59A 107.0(6) . . ?
 C49A C59A C58A 120.0(6) . . ?
 C49A C59A C60A 120.1(6) . . ?
 C58A C59A C60A 108.5(5) . . ?
 C52A C60A C56A 120.7(6) . . ?
 C52A C60A C59A 120.2(6) . . ?
 C56A C60A C59A 107.1(6) . . ?
 C2B C1B C5B 109.0(7) . . ?
 C9B C1B C2B 119.8(6) . . ?
 C9B C1B C5B 119.1(7) . . ?
 C1B C2B C3B 108.2(6) . . ?
 C12B C2B C1B 120.6(7) . . ?
 C12B C2B C3B 119.1(7) . . ?
 C4B C3B C2B 106.7(7) . . ?
 C15B C3B C2B 119.2(6) . . ?
 C15B C3B C4B 121.6(8) . . ?
 C3B C4B C5B 110.0(7) . . ?
 C18B C4B C3B 119.4(7) . . ?
 C18B C4B C5B 118.9(6) . . ?
 C4B C5B C1B 106.1(6) . . ?
 C6B C5B C1B 120.8(7) . . ?
 C6B C5B C4B 121.4(7) . . ?
 C5B C6B C7B 120.1(7) . . ?
 C5B C6B C20B 120.5(8) . . ?
 C7B C6B C20B 106.7(7) . . ?
 C6B C7B C22B 108.8(7) . . ?
 C8B C7B C6B 119.7(7) . . ?
 C8B C7B C22B 119.3(7) . . ?
 C7B C8B C9B 120.8(7) . . ?
 C7B C8B C25B 117.5(7) . . ?
 C9B C8B C25B 109.6(6) . . ?
 C1B C9B C8B 119.5(7) . . ?
 C1B C9B C10B 119.6(7) . . ?
 C8B C9B C10B 108.6(6) . . ?
 C9B C10B C26B 108.0(6) . . ?
 C11B C10B C9B 119.9(7) . . ?
 C11B C10B C26B 120.3(7) . . ?
 C10B C11B C12B 120.3(6) . . ?
 C10B C11B C29B 119.0(6) . . ?
 C12B C11B C29B 107.6(7) . . ?
 C2B C12B C11B 119.7(7) . . ?
 C2B C12B C13B 121.6(7) . . ?
 C13B C12B C11B 107.5(6) . . ?
 C12B C13B C30B 110.3(7) . . ?
 C14B C13B C12B 118.4(7) . . ?
 C14B C13B C30B 118.4(7) . . ?
 C13B C14B C15B 121.0(7) . . ?
 C13B C14B C33B 119.4(7) . . ?
 C15B C14B C33B 108.7(7) . . ?
 C3B C15B C14B 120.8(7) . . ?
 C3B C15B C16B 118.9(7) . . ?
 C14B C15B C16B 108.0(7) . . ?
 C17B C16B C15B 119.6(7) . . ?
 C17B C16B C34B 121.5(7) . . ?
 C34B C16B C15B 107.3(6) . . ?
 C16B C17B C18B 120.3(7) . . ?
 C16B C17B C37B 120.4(7) . . ?
 C18B C17B C37B 107.1(6) . . ?
 C4B C18B C17B 120.2(7) . . ?
 C4B C18B C19B 119.5(7) . . ?
 C17B C18B C19B 108.9(6) . . ?
 C20B C19B C18B 121.4(7) . . ?
 C20B C19B C38B 120.0(7) . . ?
 C38B C19B C18B 106.2(6) . . ?
 C19B C20B C6B 118.3(7) . . ?
 C19B C20B C21B 121.8(7) . . ?
 C21B C20B C6B 108.2(7) . . ?
 C20B C21B C22B 110.0(7) . . ?
 C40B C21B C20B 118.8(7) . . ?
 C40B C21B C22B 119.2(7) . . ?
 C21B C22B C7B 106.2(7) . . ?
 C23B C22B C7B 120.3(7) . . ?
 C23B C22B C21B 121.6(7) . . ?
 C22B C23B C24B 121.1(7) . . ?
 C22B C23B C42B 119.4(8) . . ?
 C24B C23B C42B 107.4(6) . . ?
 C25B C24B C23B 119.9(7) . . ?
 C25B C24B C44B 119.0(7) . . ?
 C44B C24B C23B 109.5(7) . . ?
 C24B C25B C8B 121.8(7) . . ?
 C24B C25B C26B 120.6(7) . . ?
 C26B C25B C8B 105.0(6) . . ?
 C10B C26B C25B 108.8(6) . . ?
 C27B C26B C10B 120.5(7) . . ?
 C27B C26B C25B 119.8(7) . . ?
 C26B C27B C28B 120.1(7) . . ?
 C26B C27B C45B 119.2(7) . . ?
 C28B C27B C45B 107.7(7) . . ?
 C27B C28B C47B 108.6(7) . . ?
 C29B C28B C27B 120.6(7) . . ?
 C29B C28B C47B 119.5(8) . . ?
 C28B C29B C11B 119.6(7) . . ?
 C28B C29B C30B 120.6(7) . . ?
 C30B C29B C11B 108.0(6) . . ?
 C13B C30B C29B 106.6(6) . . ?
 C31B C30B C13B 122.1(7) . . ?
 C31B C30B C29B 118.9(7) . . ?
 C30B C31B C32B 118.8(7) . . ?
 C30B C31B C48B 121.5(8) . . ?
 C48B C31B C32B 107.7(7) . . ?
 C31B C32B C50B 107.4(7) . . ?
 C33B C32B C31B 121.5(7) . . ?
 C33B C32B C50B 120.8(7) . . ?
 C32B C33B C14B 119.6(8) . . ?
 C32B C33B C34B 120.5(7) . . ?
 C34B C33B C14B 106.9(6) . . ?
 C33B C34B C16B 109.1(7) . . ?
 C35B C34B C16B 118.4(7) . . ?
 C35B C34B C33B 119.9(7) . . ?
 C34B C35B C36B 120.0(7) . . ?
 C34B C35B C51B 120.8(7) . . ?
 C51B C35B C36B 106.9(6) . . ?
 C37B C36B C35B 121.2(7) . . ?
 C37B C36B C53B 120.7(7) . . ?
 C53B C36B C35B 108.0(6) . . ?
 C36B C37B C17B 118.4(7) . . ?
 C36B C37B C38B 120.1(7) . . ?
 C38B C37B C17B 108.5(7) . . ?
 C37B C38B C19B 109.4(6) . . ?
 C39B C38B C19B 118.9(7) . . ?
 C39B C38B C37B 120.4(7) . . ?
 C38B C39B C40B 120.0(7) . . ?
 C38B C39B C54B 119.3(6) . . ?
 C40B C39B C54B 107.6(6) . . ?
 C21B C40B C39B 120.5(7) . . ?
 C21B C40B C41B 120.3(7) . . ?
 C39B C40B C41B 107.1(6) . . ?
 C42B C41B C40B 119.5(7) . . ?
 C42B C41B C55B 119.6(6) . . ?
 C55B C41B C40B 109.3(7) . . ?
 C41B C42B C23B 120.1(7) . . ?
 C41B C42B C43B 120.6(7) . . ?
 C43B C42B C23B 107.7(7) . . ?
 C42B C43B C44B 108.4(7) . . ?
 C57B C43B C42B 121.0(7) . . ?
 C57B C43B C44B 119.4(6) . . ?
 C24B C44B C43B 107.0(6) . . ?
 C45B C44B C24B 122.2(7) . . ?
 C45B C44B C43B 118.9(7) . . ?
 C44B C45B C27B 119.2(7) . . ?
 C44B C45B C46B 120.9(7) . . ?
 C46B C45B C27B 108.2(6) . . ?
 C45B C46B C47B 108.9(7) . . ?
 C58B C46B C45B 120.0(7) . . ?
 C58B C46B C47B 119.1(8) . . ?
 C46B C47B C28B 106.6(7) . . ?
 C48B C47B C28B 119.3(7) . . ?
 C48B C47B C46B 122.0(7) . . ?
 C31B C48B C49B 109.4(7) . . ?
 C47B C48B C31B 120.1(7) . . ?
 C47B C48B C49B 118.1(6) . . ?
 C50B C49B C48B 107.1(6) . . ?
 C59B C49B C48B 120.5(7) . . ?
 C59B C49B C50B 120.6(7) . . ?
 C49B C50B C32B 108.4(7) . . ?
 C51B C50B C32B 118.3(7) . . ?
 C51B C50B C49B 120.5(7) . . ?
 C50B C51B C35B 119.7(7) . . ?
 C50B C51B C52B 119.6(7) . . ?
 C52B C51B C35B 108.6(6) . . ?
 C51B C52B C53B 108.9(6) . . ?
 C60B C52B C51B 119.7(7) . . ?
 C60B C52B C53B 120.4(6) . . ?
 C36B C53B C52B 107.6(6) . . ?
 C54B C53B C36B 119.4(6) . . ?
 C54B C53B C52B 120.1(7) . . ?
 C53B C54B C39B 120.0(6) . . ?
 C53B C54B C55B 119.9(6) . . ?
 C55B C54B C39B 109.2(7) . . ?
 C54B C55B C41B 106.8(6) . . ?
 C56B C55B C41B 119.7(7) . . ?
 C56B C55B C54B 120.6(6) . . ?
 C55B C56B C57B 119.6(7) . . ?
 C55B C56B C60B 119.7(7) . . ?
 C60B C56B C57B 109.1(6) . . ?
 C43B C57B C56B 119.5(6) . . ?
 C43B C57B C58B 121.0(7) . . ?
 C58B C57B C56B 107.4(6) . . ?
 C46B C58B C57B 119.8(7) . . ?
 C46B C58B C59B 119.0(6) . . ?
 C57B C58B C59B 109.1(7) . . ?
 C49B C59B C58B 121.3(7) . . ?
 C49B C59B C60B 120.5(7) . . ?
 C60B C59B C58B 106.2(6) . . ?
 C52B C60B C56B 119.3(6) . . ?
 C52B C60B C59B 119.1(6) . . ?
 C56B C60B C59B 108.2(7) . . ?
 S5 C3 S6 177.8(5) . . ?
 S3 C2 S4 177.4(5) . . ?
 S2 C1 S1 177.7(5) . . ?

_shelx_res_file
;
    2016sot0001_r_100k.res created by SHELXL-2014/7

TITL 2016sot0001_R_100K in P21/n #14
REM reset to P21/n #14
CELL 0.71073 9.886703 25.510001 24.73531 90 90.221 90
ZERR 4 0.000619 0.001225 0.001431 0 0.023 0
LATT 1
SYMM 0.5-X,0.5+Y,0.5-Z
SFAC C H F S
UNIT 492 8 8 24
RIGU

L.S. 5
PLAN  20
TEMP -173(2)
BOND
MORE -1
BOND $H
fmap 2
acta 52
SHEL 7 0.74
TWIN -1 0 0 0 -1 0 0 0 1 2
OMIT -1 2 5
OMIT 0 2 4
OMIT 1 2 5
OMIT 4 6 0
OMIT 0 4 8
OMIT 8 6 3
OMIT 1 3 8
OMIT 6 5 4
REM <olex2.extras>
REM <HklSrc "%.\\2016sot0001_R_100K.hkl">
REM </olex2.extras>

WGHT    0.105800    2.623600
BASF   0.36338
FVAR       0.22362
C1A   1    0.963313    0.614812    0.711521    11.00000    0.03873    0.02217 =
         0.03632   -0.00986   -0.00788   -0.00785
C2A   1    0.973661    0.579822    0.757557    11.00000    0.03241    0.03377 =
         0.02696   -0.00957   -0.00574   -0.00107
C3A   1    0.847184    0.582366    0.786397    11.00000    0.04366    0.02894 =
         0.01970   -0.01173   -0.00475    0.00193
C4A   1    0.759718    0.618780    0.759212    11.00000    0.04760    0.02133 =
         0.02924   -0.01066    0.00117    0.00417
C5A   1    0.827536    0.639127    0.713022    11.00000    0.05000    0.01530 =
         0.03428   -0.00656   -0.00534   -0.00148
C6A   1    0.763539    0.648925    0.664787    11.00000    0.05027    0.00919 =
         0.03904    0.00490    0.00038   -0.00199
C7A   1    0.821453    0.634345    0.613108    11.00000    0.04727    0.01929 =
         0.03090    0.00824    0.00258   -0.00285
C8A   1    0.944659    0.610365    0.612405    11.00000    0.04192    0.02679 =
         0.03748    0.00974    0.00588   -0.00777
C9A   1    1.019144    0.600939    0.662733    11.00000    0.03749    0.02171 =
         0.03625    0.00485    0.00413   -0.01359
C10A  1    1.089349    0.550860    0.656927    11.00000    0.02821    0.02983 =
         0.03169    0.00089    0.00469   -0.00912
C11A  1    1.098691    0.517459    0.700985    11.00000    0.02568    0.03175 =
         0.03205   -0.00339   -0.00476   -0.00210
C12A  1    1.039838    0.532073    0.752594    11.00000    0.02832    0.03380 =
         0.02593   -0.00444   -0.01228   -0.00122
C13A  1    0.983695    0.484831    0.776885    11.00000    0.03427    0.03679 =
         0.01706    0.00104   -0.01338    0.00376
C14A  1    0.863695    0.487923    0.804754    11.00000    0.04458    0.03515 =
         0.01748    0.00419   -0.00650    0.00163
C15A  1    0.792797    0.537732    0.809801    11.00000    0.05310    0.03449 =
         0.01041   -0.00554   -0.00512    0.00124
C16A  1    0.650847    0.527544    0.806082    11.00000    0.04641    0.03650 =
         0.00943   -0.00512    0.00640    0.00026
C17A  1    0.566882    0.563232    0.781142    11.00000    0.04366    0.03188 =
         0.02251   -0.00864    0.00851    0.00378
C18A  1    0.620515    0.609442    0.756352    11.00000    0.04281    0.02719 =
         0.02867   -0.00938    0.00564    0.00969
C19A  1    0.547697    0.619844    0.705501    11.00000    0.04165    0.02257 =
         0.03154   -0.00680    0.00438    0.01450
C20A  1    0.616069    0.639069    0.661793    11.00000    0.04274    0.01958 =
         0.03602   -0.00058   -0.00089    0.01307
C21A  1    0.585948    0.618470    0.608073    11.00000    0.04846    0.01645 =
         0.03358    0.00436   -0.00180    0.01146
C22A  1    0.712562    0.616121    0.578315    11.00000    0.05282    0.02196 =
         0.02762    0.01036   -0.00228    0.00116
C23A  1    0.737116    0.573361    0.543571    11.00000    0.05171    0.03209 =
         0.01042    0.01172   -0.00469    0.00365
C24A  1    0.868358    0.549124    0.542596    11.00000    0.04292    0.03429 =
         0.01723    0.00919    0.00603   -0.00374
C25A  1    0.971197    0.567417    0.576217    11.00000    0.03983    0.03848 =
         0.02766    0.00400    0.00937   -0.00628
C26A  1    1.059923    0.529828    0.603747    11.00000    0.02413    0.03479 =
         0.03182   -0.00034    0.01211   -0.00336
C27A  1    1.042243    0.477255    0.596827    11.00000    0.03227    0.03630 =
         0.03048   -0.00247    0.00712    0.00415
C28A  1    1.052654    0.441803    0.643290    11.00000    0.03202    0.03118 =
         0.03313   -0.00384    0.00405    0.01401
C29A  1    1.079736    0.461598    0.693319    11.00000    0.03198    0.03029 =
         0.03065   -0.00135   -0.00387    0.00837
C30A  1    1.008883    0.441299    0.740055    11.00000    0.03115    0.02963 =
         0.02735    0.00588   -0.01069    0.00964
C31A  1    0.911666    0.402725    0.733656    11.00000    0.04882    0.02354 =
         0.02387    0.01097   -0.00177    0.00264
C32A  1    0.784457    0.405105    0.762719    11.00000    0.05273    0.02190 =
         0.02416    0.01105   -0.00239   -0.00188
C33A  1    0.760377    0.447062    0.798196    11.00000    0.05243    0.03140 =
         0.01431    0.01191   -0.00271   -0.00224
C34A  1    0.630612    0.471945    0.798858    11.00000    0.05232    0.03623 =
         0.00953    0.00835    0.00659   -0.00361
C35A  1    0.526116    0.453148    0.764957    11.00000    0.03578    0.03363 =
         0.02511    0.00810    0.01136   -0.00710
C36A  1    0.438454    0.490845    0.737359    11.00000    0.03317    0.04306 =
         0.03069    0.00015    0.01306   -0.00397
C37A  1    0.457317    0.544317    0.744658    11.00000    0.03632    0.03806 =
         0.02783   -0.00191    0.01224    0.00197
C38A  1    0.448011    0.579715    0.698584    11.00000    0.03059    0.03045 =
         0.02964   -0.00442    0.00597    0.01144
C39A  1    0.419317    0.559911    0.647356    11.00000    0.02570    0.03320 =
         0.03036    0.00347   -0.00481    0.00751
C40A  1    0.490446    0.580074    0.601275    11.00000    0.03746    0.03033 =
         0.02699    0.00451   -0.00275    0.01082
C41A  1    0.516026    0.536478    0.564784    11.00000    0.04132    0.04051 =
         0.01834   -0.00105   -0.00752    0.00435
C42A  1    0.635803    0.533216    0.537095    11.00000    0.04653    0.03628 =
         0.01377   -0.00063   -0.00497    0.00462
C43A  1    0.705344    0.483661    0.531799    11.00000    0.04406    0.03912 =
         0.01224   -0.00496   -0.00003    0.00229
C44A  1    0.848028    0.493310    0.535131    11.00000    0.04539    0.03741 =
         0.01430    0.00025    0.01028    0.00202
C45A  1    0.932618    0.457420    0.561649    11.00000    0.04064    0.03335 =
         0.01958   -0.00973    0.00799    0.00468
C46A  1    0.877569    0.411181    0.585447    11.00000    0.04553    0.02470 =
         0.02032   -0.01007    0.00375    0.00713
C47A  1    0.949414    0.401358    0.635741    11.00000    0.04080    0.02258 =
         0.03334   -0.00748   -0.00097    0.01248
C48A  1    0.881347    0.382127    0.680361    11.00000    0.04828    0.01496 =
         0.03198    0.00021   -0.00408    0.00922
C49A  1    0.737713    0.372065    0.676562    11.00000    0.05522    0.01517 =
         0.03288    0.00130   -0.00435   -0.00241
C50A  1    0.678176    0.386639    0.727988    11.00000    0.05251    0.01329 =
         0.03390    0.00633   -0.00405   -0.00560
C51A  1    0.549128    0.410310    0.729139    11.00000    0.04186    0.02354 =
         0.02897    0.00818    0.00559   -0.00993
C52A  1    0.477452    0.420515    0.679239    11.00000    0.03125    0.02939 =
         0.03664    0.00160    0.00206   -0.01390
C53A  1    0.410268    0.469824    0.684434    11.00000    0.02750    0.03550 =
         0.03414   -0.00097    0.00298   -0.00793
C54A  1    0.401253    0.503510    0.639718    11.00000    0.03424    0.03680 =
         0.02722   -0.00060   -0.00188   -0.00174
C55A  1    0.461476    0.488792    0.589081    11.00000    0.03393    0.03691 =
         0.02389   -0.00574   -0.00588   -0.00421
C56A  1    0.526199    0.441110    0.584084    11.00000    0.02904    0.03014 =
         0.02426   -0.00946   -0.00861   -0.00828
C57A  1    0.652713    0.438382    0.554845    11.00000    0.04071    0.03039 =
         0.01806   -0.00925   -0.00349   -0.00152
C58A  1    0.741503    0.401800    0.581877    11.00000    0.05444    0.01911 =
         0.02529   -0.00972   -0.00065   -0.00039
C59A  1    0.668738    0.381947    0.628924    11.00000    0.05024    0.01694 =
         0.03020   -0.00484   -0.00586   -0.00415
C60A  1    0.534954    0.406562    0.630286    11.00000    0.04059    0.02315 =
         0.03262   -0.00737   -0.00417   -0.01197
C1B   1    0.466636    0.890507    0.623793    11.00000    0.04937    0.03862 =
         0.03913   -0.01790   -0.01318   -0.01150
C2B   1    0.400591    0.853851    0.659100    11.00000    0.06071    0.04321 =
         0.02525   -0.00901   -0.01431   -0.00332
C3B   1    0.260459    0.872823    0.668954    11.00000    0.06811    0.05108 =
         0.01655   -0.01607   -0.00081    0.00431
C4B   1    0.245232    0.920919    0.638866    11.00000    0.06111    0.03358 =
         0.03635   -0.01964   -0.00596   -0.00076
C5B   1    0.371082    0.932990    0.610093    11.00000    0.05617    0.02860 =
         0.04586   -0.01646   -0.00667   -0.01032
C6B   1    0.369553    0.954385    0.560115    11.00000    0.06131    0.02529 =
         0.05821   -0.00415   -0.00006   -0.01375
C7B   1    0.460743    0.935453    0.519287    11.00000    0.05136    0.02563 =
         0.06114    0.00722    0.00614   -0.02257
C8B   1    0.552188    0.894903    0.531826    11.00000    0.03833    0.04114 =
         0.05946   -0.00395   -0.00008   -0.01394
C9B   1    0.555523    0.872295    0.584209    11.00000    0.03854    0.04258 =
         0.04480   -0.00626   -0.01012   -0.00723
C10B  1    0.579370    0.816381    0.578801    11.00000    0.02402    0.04537 =
         0.05067    0.00030   -0.00783    0.00519
C11B  1    0.516786    0.781875    0.613235    11.00000    0.04628    0.04366 =
         0.03632    0.00277   -0.01735    0.00801
C12B  1    0.423318    0.800987    0.654142    11.00000    0.05929    0.04474 =
         0.02001    0.00358   -0.01482    0.00834
C13B  1    0.315771    0.763873    0.658075    11.00000    0.07349    0.04280 =
         0.02573    0.01898   -0.00716    0.00506
C14B  1    0.184419    0.782631    0.666734    11.00000    0.07352    0.05171 =
         0.01887    0.01022    0.00333    0.00040
C15B  1    0.158745    0.837584    0.672597    11.00000    0.06117    0.05283 =
         0.01861   -0.00148    0.00459    0.00705
C16B  1    0.028487    0.849384    0.645972    11.00000    0.04511    0.05900 =
         0.02934   -0.00462    0.01568    0.00677
C17B  1    0.013137    0.895434    0.618132    11.00000    0.04440    0.04596 =
         0.03145   -0.01299    0.00961    0.01698
C18B  1    0.123687    0.931821    0.614180    11.00000    0.06000    0.03235 =
         0.03738   -0.01989    0.00387    0.01291
C19B  1    0.122515    0.955618    0.559563    11.00000    0.06332    0.01666 =
         0.04642   -0.01076    0.00359    0.01580
C20B  1    0.239830    0.965885    0.532593    11.00000    0.06322    0.01835 =
         0.05915   -0.00262    0.00138   -0.00431
C21B  1    0.254859    0.954261    0.476630    11.00000    0.06364    0.01743 =
         0.05490    0.01349    0.00009   -0.00332
C22B  1    0.388892    0.934718    0.466413    11.00000    0.05858    0.02775 =
         0.05051    0.01995    0.01236   -0.01442
C23B  1    0.411355    0.895219    0.430465    11.00000    0.06038    0.04379 =
         0.03893    0.01837    0.01659   -0.01074
C24B  1    0.505164    0.853302    0.442689    11.00000    0.05263    0.05252 =
         0.03905    0.00666    0.01148   -0.00302
C25B  1    0.573193    0.853246    0.490312    11.00000    0.03055    0.04799 =
         0.04843    0.00294    0.00742   -0.00507
C26B  1    0.590039    0.804374    0.521429    11.00000    0.02047    0.04951 =
         0.05366   -0.00120    0.00167    0.01231
C27B  1    0.540817    0.758958    0.501666    11.00000    0.05336    0.04654 =
         0.04743   -0.00352    0.00602    0.01636
C28B  1    0.472674    0.722445    0.537151    11.00000    0.05104    0.03546 =
         0.04976   -0.00077   -0.00144    0.02138
C29B  1    0.460537    0.732939    0.591185    11.00000    0.05477    0.03380 =
         0.04380    0.00676   -0.00981    0.01110
C30B  1    0.334779    0.721859    0.619505    11.00000    0.06458    0.02569 =
         0.04149    0.01602   -0.00496    0.00570
C31B  1    0.229062    0.700433    0.591211    11.00000    0.06600    0.02014 =
         0.05242    0.01572   -0.00202   -0.00006
C32B  1    0.093959    0.720077    0.600681    11.00000    0.06029    0.03423 =
         0.04998    0.01951    0.00898   -0.01343
C33B  1    0.069963    0.758547    0.637288    11.00000    0.06033    0.05016 =
         0.03431    0.01453    0.01273   -0.01206
C34B  1   -0.024806    0.800264    0.625176    11.00000    0.05501    0.05846 =
         0.03541    0.00467    0.01343   -0.00303
C35B  1   -0.092612    0.800789    0.576043    11.00000    0.04259    0.05242 =
         0.04033    0.00229    0.01259   -0.00528
C36B  1   -0.107309    0.850435    0.545652    11.00000    0.03194    0.05232 =
         0.04738   -0.00084    0.00422    0.00070
C37B  1   -0.058716    0.896301    0.565670    11.00000    0.04080    0.04507 =
         0.04381   -0.00502    0.00228    0.01423
C38B  1    0.008051    0.932341    0.530973    11.00000    0.04683    0.03156 =
         0.04850   -0.00097    0.00173    0.02261
C39B  1    0.020136    0.921829    0.476136    11.00000    0.04345    0.03156 =
         0.04122    0.00841   -0.00599    0.01274
C40B  1    0.145652    0.932608    0.448683    11.00000    0.05483    0.02876 =
         0.04791    0.01454    0.00247    0.00326
C41B  1    0.167061    0.890289    0.410227    11.00000    0.06052    0.04407 =
         0.01795    0.01713   -0.00269    0.00290
C42B  1    0.296364    0.872007    0.401350    11.00000    0.06264    0.04936 =
         0.03012    0.01508    0.01086    0.00289
C43B  1    0.321700    0.817013    0.396143    11.00000    0.05946    0.05096 =
         0.01982   -0.00095    0.01283    0.00507
C44B  1    0.453176    0.805103    0.422326    11.00000    0.04770    0.05674 =
         0.02985   -0.00395    0.02153    0.00220
C45B  1    0.467450    0.759234    0.449557    11.00000    0.05015    0.04571 =
         0.03265   -0.00867    0.01370    0.01559
C46B  1    0.357030    0.722481    0.453171    11.00000    0.06314    0.03418 =
         0.03989   -0.01616    0.00368    0.01416
C47B  1    0.357220    0.698939    0.507486    11.00000    0.06473    0.02386 =
         0.05070   -0.00659   -0.00020    0.01323
C48B  1    0.239970    0.688381    0.534561    11.00000    0.06502    0.01600 =
         0.05354    0.00229   -0.00167    0.00063
C49B  1    0.110170    0.700417    0.507258    11.00000    0.06561    0.01851 =
         0.05041   -0.00129   -0.00515   -0.01179
C50B  1    0.020005    0.718915    0.547610    11.00000    0.05692    0.02495 =
         0.05855    0.00587    0.00270   -0.01475
C51B  1   -0.070626    0.759330    0.536187    11.00000    0.03514    0.04253 =
         0.04683    0.00069    0.00325   -0.01751
C52B  1   -0.072607    0.782287    0.483249    11.00000    0.03397    0.03900 =
         0.04556   -0.00310   -0.00702   -0.01187
C53B  1   -0.097036    0.838494    0.488341    11.00000    0.03095    0.04315 =
         0.03933   -0.00069   -0.00751    0.00100
C54B  1   -0.032757    0.872974    0.454820    11.00000    0.04594    0.04228 =
         0.03864    0.00551   -0.00919    0.00728
C55B  1    0.056678    0.853717    0.413654    11.00000    0.05713    0.04612 =
         0.02024    0.00313   -0.00920    0.00498
C56B  1    0.081810    0.799845    0.408517    11.00000    0.05146    0.04511 =
         0.01959   -0.00643   -0.01053   -0.00247
C57B  1    0.219270    0.781585    0.399304    11.00000    0.05953    0.04563 =
         0.01069   -0.00970    0.00054    0.00169
C58B  1    0.235809    0.733475    0.428570    11.00000    0.06679    0.03371 =
         0.03129   -0.01633   -0.00589    0.00300
C59B  1    0.108722    0.721256    0.457392    11.00000    0.06028    0.02608 =
         0.03671   -0.01043   -0.00913   -0.01212
C60B  1    0.013598    0.763329    0.443611    11.00000    0.04936    0.04045 =
         0.03396   -0.01124   -0.01170   -0.01241
S5    4    0.450787    0.746515    0.280034    11.00000    0.05653    0.03547 =
         0.04078    0.00125    0.00896    0.00107
S6    4    0.143657    0.742667    0.255247    11.00000    0.07508    0.03048 =
         0.07438    0.01675   -0.03039   -0.01413
C3    1    0.298865    0.744676    0.266556    11.00000    0.06825    0.02017 =
         0.02788    0.00053   -0.00982   -0.01202
S3    4    0.243132    0.567430    0.865798    11.00000    0.05686    0.04780 =
         0.03387   -0.00542   -0.00426   -0.00311
S4    4    0.267549    0.669680    0.800870    11.00000    0.07486    0.04401 =
         0.14019    0.02498   -0.00907   -0.00055
C2    1    0.253462    0.618397    0.834862    11.00000    0.03555    0.04064 =
         0.04911   -0.01430    0.00209    0.00718
S1    4    0.216830    0.314413    0.688788    11.00000    0.06636    0.05189 =
         0.04881    0.01378   -0.00141    0.01392
S2    4    0.250531    0.339061    0.567276    11.00000    0.05121    0.04523 =
         0.03985   -0.00985    0.00477   -0.00627
C1    1    0.235356    0.325759    0.627559    11.00000    0.02899    0.03040 =
         0.05014   -0.00816   -0.00458    0.00317
F1B   3    0.241591    0.827017    0.533544    11.00000    0.06523    0.05155 =
         0.05435   -0.00119    0.00263    0.00613
F1A   3    0.750481    0.510694    0.670682    11.00000    0.06861    0.05574 =
         0.04384   -0.00384   -0.00258    0.00368
HKLF 4

REM  2016sot0001_R_100K in P21/n #14
REM R1 =  0.0878 for    7541 Fo > 4sig(Fo)  and  0.1682 for all   13735 data
REM   1181 parameters refined using   1647 restraints

END

WGHT      0.1058      2.6237

REM Highest difference peak  0.485,  deepest hole -0.694,  1-sigma level  0.099
Q1    1   0.4598  0.9410  0.5499  11.00000  0.05    0.49
Q2    1   0.0116  0.7476  0.2697  11.00000  0.05    0.47
Q3    1   0.0118  0.7485  0.5984  11.00000  0.05    0.43
Q4    1   0.9606  0.3988  0.6664  11.00000  0.05    0.43
Q5    1   0.5623  0.8697  0.6219  11.00000  0.05    0.42
Q6    1   0.5475  0.7785  0.5676  11.00000  0.05    0.42
Q7    1   1.0691  0.5713  0.6579  11.00000  0.05    0.41
Q8    1   0.2065  0.6879  0.8299  11.00000  0.05    0.39
Q9    1   0.5860  0.7923  0.4913  11.00000  0.05    0.39
Q10   1   0.4025  0.8412  0.4099  11.00000  0.05    0.39
Q11   1   0.5784  0.8100  0.5599  11.00000  0.05    0.38
Q12   1  -0.0687  0.7701  0.5109  11.00000  0.05    0.38
Q13   1   0.5653  0.8294  0.4731  11.00000  0.05    0.38
Q14   1  -0.0088  0.9083  0.5089  11.00000  0.05    0.38
Q15   1   0.5837  0.4086  0.5853  11.00000  0.05    0.37
Q16   1   0.4283  0.4800  0.7084  11.00000  0.05    0.37
Q17   1  -0.0708  0.8373  0.5861  11.00000  0.05    0.37
Q18   1   0.0127  0.9214  0.4986  11.00000  0.05    0.37
Q19   1   0.2558  0.7099  0.7594  11.00000  0.05    0.36
Q20   1   0.4280  0.5676  0.6729  11.00000  0.05    0.36
;
_shelx_res_checksum               73544
_shelx_hkl_file
;
   0   0 -18  141.19   21.58
   0   0 -17   -3.95    8.76
   0   0 -16    9.03    8.35
   0   0 -15    6.54    8.68
   0   0 -14  324.17   24.84
   0   0 -13    7.04    8.38
   0   0 -12   15.90    6.61
   0   0 -11    9.77    7.47
   0   0 -10  433.06   23.16
   0   0  -9   18.49    6.57
   0   0  -8  594.63   24.09
   0   0  -7    1.22    4.92
   0   0  -6 2558.67   42.15
   0   0  -5   49.94    8.12
   0   0  -4    9.02    3.67
   0   0  -3   -2.63    2.01
   0   0   3   51.58    5.10
   0   0   4    9.68    3.24
   0   0   5   53.74    7.93
   0   0   6 2542.59   37.71
   0   0   7   -5.30    4.06
   0   0   8  603.66   21.75
   0   0   9   15.05    5.85
   0   0  10  408.59   19.71
   0   0  11    4.76    5.80
   0   0  12   27.08    7.16
   0   0  13    9.03    5.54
   0   0  14  376.98   21.72
   0   0  15    3.08    4.62
   0   0  16    4.81    4.92
   0   0  17   15.78    6.87
   0   0  18  174.49   16.81
   0   0  19   16.00    7.22
   0   0  20    5.70    6.26
   0   0  21    3.29    5.71
   0   0  22   14.79    7.89
   0   0  23   -1.13    5.94
   0   0  24   33.50    9.54
   0   0  25    6.27    7.38
   0   0  26    7.84    6.53
   0   0  27    4.68    6.35
   0   0  29    8.77   11.30
   0   0  30  120.64   22.93
   0   0  31   18.73   11.62
   0   0  32   18.88   14.99
   0   0  33  -19.93   16.45
   0   0  34   36.22   19.38
   0   0  35    8.22   15.70
   0   1 -18  342.25   30.51
   0  -1 -17   24.77   10.71
   0   1 -17   22.83   10.97
   0   1 -16   10.17    8.55
   0  -1 -16   10.66    8.35
   0   1 -15   75.33   14.61
   0  -1 -15   55.82   12.75
   0   1 -14   57.44   12.56
   0  -1 -14   64.38   11.77
   0   1 -13   45.30   10.43
   0  -1 -13   50.86   10.78
   0   1 -12  362.59   24.61
   0  -1 -12  363.78   24.08
   0   1 -11  160.91   15.95
   0  -1 -11  164.30   16.26
   0  -1 -10   71.24   10.39
   0   1 -10   73.24   10.78
   0  -1  -9  464.58   23.01
   0   1  -9  501.80   24.33
   0  -1  -8 2454.82   47.51
   0   1  -8 2412.68   48.01
   0  -1  -7  136.42   11.15
   0   1  -7  146.24   12.10
   0   1  -6 2900.60   45.24
   0  -1  -6 2743.48   42.50
   0   1  -5  563.10   19.56
   0  -1  -5  556.28   18.45
   0  -1  -4   39.10    4.79
   0   1  -4   45.96    5.22
   0  -1  -3 1086.26   19.83
   0  -1  -2    0.59    0.61
   0   1   2    1.03    1.14
   0   1   2   -0.81    0.89
   0   1   3 1798.53   21.92
   0  -1   4   38.67    5.21
   0   1   4   36.15    4.58
   0   1   5  604.30   17.44
   0  -1   5  580.77   17.89
   0   1   6 2774.54   38.57
   0  -1   6 2654.47   39.91
   0   1   7  134.00    9.63
   0  -1   7  147.05   10.80
   0   1   8 2422.58   41.42
   0  -1   8 2204.97   42.12
   0  -1   9  464.61   20.68
   0   1   9  491.77   20.66
   0   1  10   79.84    9.15
   0  -1  10   76.69    9.53
   0  -1  11  174.74   14.59
   0   1  11  155.03   12.37
   0   1  12  347.48   19.17
   0  -1  12  383.12   21.24
   0  -1  13   59.41    9.54
   0   1  13   52.31    8.61
   0   1  14   57.55    9.26
   0  -1  14   63.35    9.67
   0  -1  15   65.96   11.24
   0   1  15   77.20   10.77
   0   1  16    9.97    5.44
   0  -1  16   22.88    7.71
   0  -1  17   25.06    7.57
   0   1  17   20.35    6.75
   0   1  18  474.83   26.92
   0  -1  18  417.63   25.64
   0   1  19   -2.87    5.46
   0  -1  19    1.17    5.32
   0   1  20  298.82   22.96
   0  -1  20  243.86   20.62
   0  -1  21   19.88    9.27
   0   1  21   17.13    7.84
   0  -1  22  194.49   19.50
   0   1  22  156.47   17.41
   0  -1  23   20.12    7.70
   0   1  23   31.25    9.69
   0  -1  24  223.84   21.46
   0   1  24  202.31   19.30
   0  -1  25   -9.50    8.45
   0   1  25    8.72    7.00
   0   1  26   28.38   10.11
   0  -1  26   29.68   10.10
   0   1  27   41.83   14.03
   0  -1  27   72.15   13.50
   0   1  27   62.08   12.14
   0   1  28   11.60   10.72
   0   1  29    7.91   11.39
   0   1  30   -1.59   10.79
   0   1  31   -0.02   11.56
   0  -1  31   -1.23   10.43
   0  -1  32   -3.13   13.52
   0   1  32   16.30   15.27
   0  -1  33   -7.15   12.63
   0   1  33  -11.56   14.59
   0   1  34   16.77   16.04
   0  -1  34   20.46   18.44
   0   1  35   -5.67   16.01
   0  -1  35    9.65   17.21
   0   2 -19  195.04   23.97
   0   2 -18  397.97   32.68
   0   2 -17  229.35   24.82
   0   2 -16   22.17   10.83
   0  -2 -16   22.54   10.57
   0   2 -15  122.73   16.49
   0  -2 -15  136.34   18.06
   0  -2 -14   32.61   10.24
   0   2 -14   33.37   10.61
   0   2 -13  116.55   14.89
   0  -2 -13  110.85   15.01
   0   2 -12  364.15   24.80
   0  -2 -12  335.72   23.33
   0   2 -11  507.49   27.45
   0  -2 -11  503.61   26.92
   0   2 -10   74.46   12.14
   0  -2 -10   56.40    9.44
   0  -2  -9  167.38   14.56
   0   2  -9  167.82   15.56
   0   2  -8  151.97   13.24
   0  -2  -8  124.09   11.82
   0   2  -7  162.92   12.23
   0  -2  -7  178.87   12.50
   0   2  -6    4.07    5.02
   0  -2  -6   12.86    5.34
   0  -2  -5  558.87   18.74
   0  -2  -4   48.20    5.40
   0  -2  -3   69.85    5.89
   0  -2  -3   72.94    5.20
   0  -2  -2   -1.58    1.85
   0  -2  -2   23.14    3.84
   0   2  -1    0.58    0.51
   0  -2  -1    0.53    0.95
   0  -2  -1   -0.57    0.65
   0  -2   0    0.03    0.39
   0  -2   1    0.25    0.72
   0   2   1   -0.20    0.53
   0   2   1   -0.84    0.95
   0   2   2   -0.66    2.65
   0   2   2   -2.82    1.32
   0   2   3   86.39    6.42
   0   2   3   81.10    5.13
   0   2   4   57.68    5.38
   0  -2   4   47.73    5.99
   0   2   4   49.47    5.93
   0   2   5  505.87   15.37
   0  -2   5  543.83   18.04
   0   2   5  524.82   17.68
   0  -2   6   10.47    5.20
   0   2   6   13.79    4.41
   0   2   7  177.91   10.83
   0  -2   7  169.02   12.09
   0  -2   8  128.61   11.68
   0   2   8  127.83   10.18
   0  -2   9  164.05   13.61
   0   2   9  139.28   11.59
   0   2  10   57.27    8.04
   0  -2  10   60.96    9.20
   0   2  11  486.45   21.42
   0  -2  11  478.02   23.73
   0  -2  12  373.77   21.67
   0   2  12  365.13   19.18
   0   2  13  139.35   12.84
   0  -2  13  120.96   13.43
   0  -2  14   29.61    6.97
   0   2  14   41.86    7.97
   0   2  15  163.15   14.45
   0  -2  15  163.76   15.90
   0   2  16   16.12    6.42
   0  -2  16   20.38    6.85
   0   2  17  267.46   19.59
   0  -2  17  280.49   21.99
   0   2  18  438.56   25.70
   0  -2  18  512.38   30.06
   0  -2  19  218.97   20.32
   0   2  19  215.26   18.18
   0   2  20   12.26    6.68
   0  -2  20   15.94    9.42
   0  -2  21  332.09   24.95
   0   2  21  353.13   24.17
   0   2  22    3.76    6.66
   0  -2  22    1.63    7.60
   0   2  23   20.94    8.06
   0  -2  23   10.82    6.82
   0   2  24   17.25    8.40
   0   2  24   14.42   11.54
   0  -2  24   22.22   10.28
   0   2  25  125.77   16.71
   0   2  25   96.94   17.92
   0  -2  25  155.26   17.83
   0   2  26    9.75    9.88
   0  -2  26    0.35    7.57
   0   2  26    1.42    6.86
   0   2  27   26.53   10.79
   0   2  27   21.15    8.91
   0   2  28  -10.88    9.28
   0   2  28    5.69   11.33
   0   2  29   20.48   14.28
   0   2  30   25.80   16.36
   0   2  31    9.44   11.98
   0   2  32    1.19   14.65
   0   2  33   35.44   17.94
   0  -2  33   20.85   14.29
   0  -2  34   25.56   18.52
   0   2  34    9.48   14.22
   0  -2  35   20.48   15.89
   0   3 -15  699.85   37.90
   0  -3 -15  644.33   36.46
   0  -3 -14   55.95   11.92
   0   3 -14   57.74   11.25
   0  -3 -13  234.36   20.97
   0   3 -13  234.53   20.97
   0  -3 -12    9.59    6.91
   0  -3 -11   69.83   10.39
   0  -3 -10    8.24    6.14
   0  -3  -9  476.17   23.62
   0  -3  -8  315.51   17.75
   0  -3  -7  140.54   12.95
   0  -3  -6  508.84   19.33
   0  -3  -5  860.02   23.45
   0  -3  -5  750.22   20.67
   0  -3  -4    8.04    3.78
   0  -3  -4   15.02    4.00
   0  -3  -3   54.98    5.65
   0  -3  -3   75.76    5.39
   0  -3  -2   22.96    3.39
   0  -3  -2   21.24    2.94
   0  -3  -1 2015.14   25.01
   0  -3  -1 2128.84   21.29
   0   3   0   -0.70    1.00
   0  -3   0    4.85    1.98
   0  -3   0    8.21    2.01
   0   3   0   -2.27    1.57
   0  -3   1 2522.76   25.42
   0  -3   1 2504.70   20.45
   0   3   2   22.51    3.96
   0  -3   2   19.18    2.91
   0   3   2   26.07    2.97
   0   3   3   70.24    6.36
   0   3   3   57.33    4.69
   0   3   4    8.95    4.16
   0   3   4   19.17    4.06
   0   3   5  877.45   19.54
   0   3   5  816.28   23.79
   0   3   6  546.72   20.51
   0  -3   6  534.96   20.52
   0   3   6  522.39   16.69
   0   3   7  161.29   12.74
   0   3   7  169.87   10.64
   0  -3   7  145.91   12.30
   0   3   8  262.72   16.97
   0  -3   8  262.94   16.54
   0   3   8  314.17   15.28
   0   3   9  467.33   22.02
   0  -3   9  411.55   21.11
   0   3   9  477.80   19.61
   0   3  10   12.29    7.12
   0  -3  10   17.35    7.51
   0   3  10   11.99    5.71
   0  -3  11   70.89   10.46
   0   3  11   86.51   10.06
   0   3  12    7.14    4.31
   0  -3  12    8.45    5.21
   0   3  13  250.48   17.10
   0  -3  13  224.38   18.45
   0  -3  14   90.50   12.88
   0   3  14   81.67   10.17
   0  -3  15  667.13   31.57
   0   3  15  697.65   29.57
   0  -3  16  172.20   17.38
   0   3  16  152.93   14.60
   0   3  17  136.95   14.06
   0  -3  17  122.30   15.56
   0   3  18  180.03   19.38
   0   3  18  173.76   15.92
   0   3  19    6.86    5.12
   0   3  19    5.00    7.65
   0  -3  19   12.85    8.75
   0  -3  20  506.17   31.59
   0   3  20  448.37   26.63
   0   3  21   33.07   12.19
   0   3  21   19.98    7.12
   0  -3  21    9.39    6.88
   0   3  22   27.76    9.35
   0  -3  22    8.68    6.82
   0   3  22   14.49   11.10
   0   3  23   39.60   13.83
   0  -3  23   33.36   11.17
   0   3  23   19.64    7.75
   0   3  24  134.54   22.17
   0   3  24  172.74   19.28
   0  -3  24  190.25   20.68
   0  -3  25   13.38   10.69
   0   3  25    5.18    6.24
   0   3  25    8.29   11.99
   0   3  26   11.53   10.14
   0  -3  26   14.43    9.11
   0   3  26    6.73    6.35
   0   3  27   30.51    9.49
   0   3  27   14.78   11.51
   0   3  28   22.44    9.34
   0   3  28   12.28   12.72
   0   3  29   32.01   16.47
   0   3  30   56.68   18.59
   0   3  31   16.62   13.84
   0   3  32   21.34   14.07
   0   3  33   15.82   14.43
   0   3  34   -5.52   13.65
   0  -3  34   23.09   14.84
   0  -3  35   -0.82   15.22
   0  -4 -14  107.90   15.97
   0  -4 -13  127.82   15.81
   0  -4 -12  171.55   17.32
   0  -4 -11  514.79   27.96
   0  -4 -10   47.59    9.79
   0  -4  -9  386.09   21.39
   0  -4  -8   24.78    6.81
   0  -4  -7 1044.65   29.78
   0  -4  -6   12.70    5.40
   0  -4  -6    6.96    4.40
   0  -4  -5  302.05   15.40
   0  -4  -5  269.01   13.42
   0  -4  -4 3075.75   43.86
   0  -4  -4 2811.62   36.81
   0  -4  -3  138.43    9.41
   0  -4  -3  157.41    8.17
   0   4  -2  150.32    7.21
   0  -4  -2  137.83    9.46
   0  -4  -2  137.75    7.04
   0   4  -1   73.59    4.53
   0   4  -1   76.96    5.48
   0  -4  -1   86.03    6.90
   0  -4  -1   87.84    5.19
   0  -4   0   16.50    3.11
   0   4   0   20.41    3.44
   0  -4   0   25.48    2.79
   0   4   0   21.40    2.92
   0   4   1   82.45    4.95
   0  -4   1   79.99    5.62
   0   4   1   97.86    6.65
   0  -4   1   86.23    4.50
   0  -4   2  144.50    6.19
   0   4   2  122.06    7.59
   0   4   2  141.38    7.06
   0  -4   2  122.54    7.15
   0   4   3  123.07    6.89
   0  -4   3  144.20    7.51
   0   4   3  144.04    9.37
   0   4   4 2922.64   42.43
   0   4   4 3055.49   35.63
   0   4   5  285.30   14.69
   0   4   5  303.69   12.39
   0   4   6   10.28    3.18
   0   4   6    8.56    4.68
   0  -4   7 1040.59   31.98
   0   4   7 1075.27   25.29
   0  -4   8   26.17    7.92
   0   4   8   31.43    7.76
   0   4   8   26.56    5.29
   0   4   9  410.75   17.52
   0  -4   9  388.07   21.74
   0   4   9  412.58   22.01
   0   4  10   52.27    7.15
   0   4  10   32.57    7.42
   0  -4  10   57.76    9.91
   0   4  11  503.81   26.56
   0   4  11  443.24   20.30
   0  -4  11  534.34   26.56
   0   4  12  179.43   14.12
   0   4  12  190.54   17.49
   0  -4  12  180.98   16.52
   0   4  13  124.15   11.89
   0  -4  13  141.08   14.65
   0   4  13  128.66   14.72
   0  -4  14  123.91   14.82
   0   4  14  136.44   12.71
   0   4  14  119.90   15.43
   0   4  15   47.54    8.81
   0  -4  15   35.58    9.64
   0   4  15   39.67    9.83
   0   4  16   16.35    5.69
   0  -4  16   13.75    7.49
   0   4  16   17.82    8.93
   0   4  17   19.66    6.10
   0  -4  17    8.12    6.36
   0   4  17    8.60    7.93
   0   4  18   31.71   11.44
   0   4  18   43.14    9.23
   0  -4  18   36.17    9.68
   0  -4  19   17.20    8.52
   0   4  19   24.59    9.96
   0   4  19   13.43    6.33
   0   4  20  144.22   20.34
   0   4  20  149.34   15.92
   0  -4  20  175.80   19.74
   0   4  21   17.13    8.50
   0   4  21   10.97    9.82
   0  -4  21    9.36    8.80
   0   4  22   31.52   10.68
   0  -4  22   45.41   11.90
   0   4  22   36.46    9.28
   0   4  23   98.33   18.53
   0   4  23  128.70   15.45
   0  -4  23  147.50   18.40
   0   4  24   51.55   10.69
   0  -4  24   34.45   10.74
   0   4  24   37.23   13.06
   0  -4  25   16.23   10.24
   0   4  25   19.76    7.89
   0   4  25   27.01   12.82
   0   4  26   -3.84    9.28
   0   4  26   17.48    7.29
   0   4  27   33.56   10.49
   0   4  27   15.25   11.66
   0   4  28   14.56   13.62
   0   4  28    6.68    7.48
   0   4  29   49.94   17.12
   0   4  30    9.67   13.19
   0   4  31   -3.68   13.04
   0   4  32   26.96   13.97
   0   4  33   99.69   24.19
   0   4  34    6.42   15.86
   0  -5 -13   89.89   14.37
   0  -5 -12  273.99   21.95
   0  -5 -11  277.11   20.75
   0  -5 -10  156.53   15.84
   0  -5  -9  125.49   13.01
   0  -5  -8   14.71    7.97
   0  -5  -7   84.28   10.40
   0  -5  -7   94.82   10.61
   0  -5  -6  135.78   10.79
   0  -5  -6  177.41   13.18
   0  -5  -5    4.06    3.53
   0  -5  -5   -0.48    4.19
   0  -5  -4  590.77   20.95
   0  -5  -4  562.80   17.12
   0  -5  -3 1922.48   29.81
   0  -5  -3 2017.63   36.84
   0   5  -2  116.51    7.15
   0  -5  -2   98.61    8.45
   0  -5  -2   89.91    6.54
   0   5  -2  112.81    8.31
   0  -5  -1  552.50   13.45
   0  -5  -1  563.26   18.47
   0   5   0    2.26    3.01
   0  -5   0    4.17    3.17
   0   5   0    3.54    2.20
   0  -5   0    2.48    2.19
   0   5   1  515.23   16.42
   0   5   1  559.66   13.35
   0  -5   1  548.92   16.12
   0  -5   1  558.85   12.71
   0  -5   2  118.43    8.88
   0  -5   2  131.85    7.20
   0   5   2  140.56    7.54
   0   5   3 1790.53   27.08
   0  -5   3 1858.02   24.45
   0   5   3 1799.62   34.08
   0   5   4  615.33   21.70
   0  -5   4  587.17   16.98
   0   5   5   -1.15    4.20
   0   5   5    3.53    3.52
   0   5   6  132.48    9.29
   0   5   6  137.10   11.27
   0   5   7  101.55   11.10
   0   5   7   97.12    9.05
   0  -5   8   23.74    7.98
   0   5   8   22.39    5.81
   0   5   8   16.79    6.84
   0   5   9  133.87   13.65
   0  -5   9  126.68   13.69
   0   5   9  127.91   10.61
   0   5  10  154.88   11.69
   0   5  10  150.99   14.94
   0  -5  10  165.52   15.59
   0  -5  11  271.88   20.33
   0   5  11  260.82   15.79
   0   5  11  265.03   19.90
   0  -5  12  290.42   21.79
   0   5  12  266.05   16.20
   0   5  12  308.96   22.61
   0   5  13   90.69   13.44
   0  -5  13   87.31   12.58
   0   5  13   91.44    9.57
   0  -5  14  136.93   16.06
   0   5  14  111.60   14.78
   0   5  14  134.63   12.63
   0   5  15   27.27   10.12
   0  -5  15   33.61    9.46
   0   5  15   39.46    7.78
   0   5  16    6.40    3.69
   0   5  16   -2.17    6.21
   0  -5  17   26.88    9.97
   0   5  17   18.76    9.27
   0   5  17   18.51    5.91
   0   5  18    7.78    6.17
   0  -5  18   20.39    9.08
   0   5  18    5.89    7.22
   0   5  19   61.93   10.68
   0   5  19   39.22   10.70
   0  -5  19   60.30   11.79
   0  -5  20   36.19   11.29
   0   5  20   47.42   12.67
   0   5  20   38.09    9.30
   0   5  21   40.52   13.09
   0  -5  21   31.02   10.79
   0   5  21   46.30   10.13
   0  -5  22   84.88   16.08
   0   5  22   85.98   13.31
   0   5  22   80.58   16.37
   0   5  23   20.25   12.52
   0   5  23    5.59    5.90
   0  -5  23   15.27    9.26
   0  -5  24   79.25   14.94
   0   5  24   89.31   13.89
   0   5  24   72.83   16.68
   0   5  25   -8.88    9.14
   0  -5  25    0.54    6.74
   0   5  25    9.93    8.14
   0   5  26   10.22   11.50
   0   5  26    2.23    5.97
   0   5  27   -0.84    5.81
   0   5  27   16.31   12.25
   0   5  28    9.96   13.40
   0   5  28    5.17    7.21
   0   5  29   57.32   16.71
   0   5  30   25.59   17.94
   0   5  31   17.59   13.92
   0   5  32   23.67   15.14
   0   5  33   66.52   22.84
   0   5  34   19.87   17.04
   0  -6 -12  129.06   15.66
   0  -6 -11    0.10    7.05
   0  -6 -10 1081.27   38.12
   0  -6  -9  308.12   19.01
   0  -6  -8 2209.70   47.49
   0  -6  -8 2634.90   55.37
   0  -6  -7    6.09    5.20
   0  -6  -7    2.00    4.40
   0  -6  -6 2594.87   44.82
   0  -6  -6 2556.31   50.72
   0  -6  -5  186.34   11.67
   0  -6  -5  165.43   12.86
   0  -6  -4   70.28    6.66
   0  -6  -4   66.81    8.34
   0  -6  -3  209.59   13.43
   0  -6  -3  199.21   10.37
   0   6  -3  194.76   10.05
   0   6  -2  108.28    7.22
   0  -6  -2  104.22    8.98
   0  -6  -2   93.48    6.75
   0   6  -2   95.63    7.82
   0   6  -1  462.91   15.62
   0  -6  -1  454.58   13.97
   0   6  -1  437.30   12.50
   0   6   0 5116.55   51.90
   0  -6   0 5042.98   54.38
   0   6   1  478.40   13.56
   0   6   1  485.03   16.70
   0  -6   1  446.44   12.52
   0  -6   1  489.94   16.89
   0  -6   2   99.45    7.92
   0  -6   2   95.95    5.95
   0   6   2   93.63    6.45
   0   6   2  114.46    9.15
   0   6   3  155.47    8.59
   0  -6   3  178.92    8.09
   0   6   3  191.17   11.92
   0  -6   3  186.52   10.45
   0  -6   4   67.69    5.59
   0   6   4   65.87    7.95
   0   6   4   61.10    6.05
   0  -6   4   76.05    7.35
   0   6   5  161.78   12.89
   0  -6   5  183.15   10.81
   0   6   5  164.16    9.79
   0   6   6 2616.52   39.82
   0   6   6 2700.58   49.29
   0   6   7    2.03    5.43
   0   6   7    8.11    4.35
   0   6   8 2588.98   53.24
   0   6   8 2290.11   41.67
   0   6   9  258.29   18.02
   0   6   9  300.81   15.75
   0   6  10 1095.09   37.67
   0   6  10 1141.69   31.54
   0  -6  10 1035.59   38.56
   0   6  11    3.85    3.80
   0  -6  11    0.86    7.09
   0   6  11    6.62    5.50
   0   6  12  146.23   12.27
   0  -6  12  135.23   16.34
   0   6  12  141.54   16.06
   0  -6  13   21.88    8.15
   0   6  13   12.60    5.62
   0   6  13    3.64    5.56
   0   6  14   56.56   12.97
   0   6  14   42.94    7.12
   0  -6  14   56.58   11.92
   0   6  15    3.27    7.18
   0  -6  15    0.59    7.77
   0   6  15    5.60    4.26
   0   6  16   15.11    7.82
   0  -6  16    6.19    7.70
   0   6  16   11.37    4.93
   0   6  17   18.14    6.65
   0   6  17   10.56    7.33
   0  -6  17   16.52    8.55
   0   6  18   41.91    8.95
   0  -6  18   49.62   12.53
   0   6  18   44.74   12.79
   0   6  19    3.34    6.76
   0   6  19   11.40    7.97
   0  -6  19   16.33    9.84
   0  -6  20    7.59    9.40
   0   6  20    7.70   10.81
   0   6  20   12.69    6.18
   0   6  21  120.61   15.37
   0  -6  21  151.53   20.04
   0   6  21  109.91   19.31
   0   6  22   45.64   11.51
   0  -6  22   69.40   14.07
   0   6  22   70.84   11.86
   0   6  23   29.56   12.62
   0   6  23   37.28   10.36
   0  -6  23   67.09   14.67
   0  -6  24   30.18   10.32
   0   6  24   14.31    7.80
   0   6  24   17.90   12.58
   0   6  25    7.46   11.50
   0   6  25   20.63    8.47
   0  -6  25    4.20    8.51
   0   6  26   21.56    9.87
   0   6  26   17.08    8.39
   0   6  27   14.50    9.26
   0   6  27   23.02   13.33
   0   6  28    1.42   11.07
   0   6  28    8.08    6.97
   0   6  29   -4.13    7.37
   0   6  29    0.74   12.05
   0   6  30   45.18   16.94
   0   6  31   13.63   13.60
   0   6  32   32.26   12.42
   0   6  33   20.11   14.53
   0  -7 -11  144.69   15.28
   0  -7 -10  277.34   19.73
   0  -7  -9  194.75   15.84
   0  -7  -9  217.28   18.11
   0  -7  -8   36.02    8.56
   0  -7  -8   35.06    7.42
   0  -7  -7  429.71   23.42
   0  -7  -7  377.61   19.37
   0  -7  -6  821.46   26.12
   0  -7  -6  988.08   32.65
   0  -7  -5   36.13    7.07
   0  -7  -5   21.36    5.07
   0  -7  -4  182.82   15.51
   0  -7  -4  224.66   13.04
   0  -7  -3  405.03   15.47
   0   7  -3  354.39   14.64
   0  -7  -3  402.62   19.64
   0  -7  -2   26.48    5.87
   0   7  -2   22.96    5.04
   0   7  -2   27.55    4.21
   0  -7  -2   38.40    4.88
   0  -7  -1   83.99    8.67
   0   7  -1   77.72    6.06
   0  -7  -1   71.83    6.23
   0   7  -1   74.25    7.33
   0   7   0   -0.47    2.16
   0  -7   0   -1.70    4.00
   0  -7   0   -0.36    2.42
   0   7   0    3.53    3.49
   0   7   1   66.24    5.83
   0  -7   1   76.91    7.43
   0   7   1   68.74    7.46
   0  -7   1   67.39    5.40
   0   7   2   30.42    4.39
   0  -7   2   30.10    5.13
   0   7   2   25.83    5.57
   0  -7   2   28.20    3.65
   0  -7   3  350.57   15.09
   0   7   3  406.92   18.85
   0  -7   3  356.77   12.32
   0   7   3  416.31   14.49
   0   7   4  215.69   14.43
   0  -7   4  240.03   13.57
   0   7   4  226.74   12.07
   0  -7   4  229.66   11.10
   0   7   5   27.45    5.60
   0   7   5   33.26    7.61
   0  -7   5   29.39    4.65
   0  -7   5   23.38    5.07
   0   7   6  946.85   24.58
   0  -7   6  951.28   26.20
   0   7   6  936.85   31.64
   0   7   7  360.61   19.98
   0   7   7  364.21   16.28
   0   7   8   34.12    7.33
   0   7   8   37.97    6.50
   0   7   9  184.21   16.20
   0   7   9  234.77   14.35
   0   7  10  311.51   16.88
   0   7  10  326.54   21.13
   0  -7  11  131.93   15.25
   0   7  11  144.89   12.22
   0   7  11  116.71   14.05
   0   7  12 1091.40   33.83
   0   7  12 1029.17   39.38
   0  -7  12 1074.96   42.72
   0  -7  13   29.60   10.37
   0   7  13   10.73    4.69
   0   7  13   31.00    8.76
   0   7  14  518.00   31.08
   0  -7  14  558.13   32.74
   0   7  14  549.84   25.84
   0  -7  15    0.52    7.96
   0   7  15   -2.59    4.92
   0   7  15    2.49    6.60
   0  -7  16  233.84   22.75
   0   7  16  203.99   16.58
   0   7  16  191.08   20.52
   0   7  17   -1.12    6.54
   0   7  17    0.80    6.35
   0  -7  17    9.60    9.28
   0   7  18   15.67    9.19
   0  -7  18   -3.48    7.63
   0   7  18    5.27    5.16
   0   7  19   26.60    7.27
   0   7  19   19.46    9.28
   0  -7  20   34.52   10.35
   0   7  20   21.44   12.19
   0   7  20   25.76    7.40
   0  -7  21  404.59   31.65
   0   7  21  454.22   27.61
   0   7  21  390.09   32.95
   0   7  22   35.45   12.06
   0  -7  22   32.46   11.01
   0   7  22   41.31    9.94
   0   7  23   34.42   12.76
   0   7  23   24.87    8.38
   0  -7  23   25.44   11.64
   0   7  24   32.66   11.53
   0  -7  24   27.85   11.00
   0   7  24   30.11    8.96
   0   7  25   44.76   15.57
   0   7  25   71.90   12.80
   0   7  26   12.33   11.41
   0   7  26   18.62    7.51
   0   7  27   14.85    8.18
   0   7  27   12.70   12.73
   0   7  28    6.41    7.19
   0   7  28   19.20   12.76
   0   7  29   81.94   19.89
   0   7  29  103.04   16.84
   0   7  30   32.20   16.83
   0   7  31   23.35   14.99
   0   7  32  -15.57   16.97
   0   7  33   -8.57   12.49
   0  -8 -10   21.02    5.86
   0  -8 -10   22.99    8.50
   0  -8  -9  381.29   23.89
   0  -8  -9  400.91   22.77
   0  -8  -8   73.43   11.55
   0  -8  -8   60.97    9.57
   0  -8  -7   65.36    8.45
   0  -8  -7   46.65    8.36
   0  -8  -6  259.48   15.13
   0  -8  -6  231.80   17.38
   0  -8  -5  519.08   24.69
   0  -8  -5  517.95   20.32
   0  -8  -4   23.44    5.06
   0  -8  -4   19.33    6.61
   0  -8  -3  857.42   29.82
   0   8  -3  776.95   22.71
   0  -8  -2 2346.42   35.89
   0   8  -2 2311.43   38.77
   0  -8  -1  192.07   14.54
   0   8  -1  196.95   12.59
   0   8  -1  191.14   10.33
   0  -8  -1  202.08   11.20
   0  -8   0    2.41    2.44
   0   8   0    7.52    3.22
   0  -8   0    7.09    4.85
   0   8   0    0.42    3.60
   0  -8   1  205.81   13.96
   0  -8   1  211.45   10.88
   0   8   1  184.49   10.40
   0   8   1  175.85   13.17
   0  -8   2 2387.68   42.49
   0   8   2 2318.50   34.75
   0  -8   2 2284.86   31.95
   0  -8   3  846.26   19.45
   0   8   3  826.36   27.34
   0   8   3  776.77   20.76
   0  -8   3  770.62   23.96
   0   8   4   28.69    5.09
   0  -8   4   30.09    6.09
   0   8   4   23.57    6.50
   0  -8   4   24.26    4.58
   0   8   5  532.35   18.66
   0  -8   5  566.57   21.15
   0   8   5  537.15   23.00
   0  -8   5  583.21   17.02
   0   8   6  234.17   12.91
   0  -8   6  273.78   15.48
   0  -8   6  270.10   12.44
   0   8   6  257.04   17.29
   0  -8   7   61.40    7.87
   0   8   7   58.42    6.94
   0   8   7   65.98   11.26
   0   8   8   74.53   10.66
   0   8   8   66.99    7.75
   0  -8   8   71.46    9.02
   0   8   9  371.29   22.72
   0   8   9  359.23   17.79
   0   8  10   23.71    8.32
   0   8  10   26.22    5.71
   0   8  11   -1.65    5.63
   0   8  11    4.10    4.29
   0  -8  12  157.68   18.26
   0   8  12  167.20   13.45
   0   8  12  149.98   16.21
   0   8  13    9.72    6.92
   0  -8  13   10.07    6.83
   0   8  13    3.61    4.30
   0  -8  14   32.73   10.98
   0   8  14   31.28    9.34
   0   8  14   30.02    6.86
   0   8  15   16.60    8.04
   0   8  15   12.11    5.68
   0  -8  15    5.45    7.02
   0   8  16  114.00   12.55
   0  -8  16  123.08   18.26
   0   8  16  126.16   16.92
   0   8  17   34.30   10.04
   0  -8  17   11.12    8.62
   0   8  17   18.36    6.02
   0   8  18  377.15   23.68
   0   8  18  315.09   26.65
   0  -8  18  393.85   31.03
   0  -8  19   14.82    9.52
   0   8  19   19.08    6.94
   0   8  19   17.43   10.96
   0  -8  20   13.76   11.19
   0   8  20   -1.55    5.07
   0   8  20   -2.10    7.84
   0   8  21   24.03   11.69
   0   8  21   46.76    9.82
   0  -8  21   54.26   14.96
   0   8  22   17.43    8.07
   0   8  22    0.01    7.81
   0  -8  22   18.57    9.93
   0   8  23   41.20   14.20
   0   8  23   20.02    7.49
   0  -8  23   29.32   12.25
   0   8  24   67.16   11.75
   0  -8  24   95.27   17.95
   0   8  24   54.67   13.11
   0   8  25   -1.61    7.21
   0   8  25   -2.18   10.84
   0   8  26   29.90   13.28
   0   8  26   24.20    9.17
   0   8  27   39.37   10.84
   0   8  27   34.72   13.62
   0   8  28   12.91   12.35
   0   8  28   11.54    8.99
   0   8  29   19.93   14.17
   0   8  29   15.91    8.45
   0   8  30   -0.16   11.65
   0   8  31    0.18   11.01
   0   8  32   -4.86   12.90
   0   8  33    6.48   13.09
   0  -9 -10   24.71    8.19
   0  -9  -9  725.69   34.06
   0  -9  -8   14.91    7.87
   0  -9  -8   22.29    6.72
   0  -9  -7    5.54    5.40
   0  -9  -7   -1.85    6.04
   0  -9  -6  152.89   14.62
   0  -9  -6  147.42   11.82
   0  -9  -5  566.85   26.54
   0  -9  -5  550.04   21.62
   0  -9  -4  697.11   23.98
   0   9  -4  725.00   22.97
   0  -9  -3   37.19    5.69
   0   9  -3   42.21    6.85
   0   9  -3   34.49    5.50
   0  -9  -3   26.96    7.70
   0   9  -2  233.94   12.25
   0   9  -2  238.61   14.43
   0  -9  -2  258.21   13.44
   0  -9  -2  250.12   16.37
   0  -9  -1 1075.94   32.93
   0  -9  -1 1032.48   25.35
   0   9  -1 1024.31   28.13
   0  -9   0   -2.18    2.60
   0   9   0    7.38    4.37
   0   9   0    2.29    2.47
   0  -9   0   -3.62    4.48
   0   9   1  993.69   29.21
   0  -9   1  942.67   22.81
   0   9   1  906.88   22.78
   0  -9   1  922.74   28.74
   0   9   2  252.78   15.77
   0   9   2  217.31   12.13
   0  -9   2  215.37   11.47
   0  -9   2  257.52   16.07
   0   9   3   32.21    6.74
   0  -9   3   34.13    5.04
   0  -9   3   49.07    7.70
   0   9   3   33.54    5.68
   0   9   4  734.64   21.48
   0  -9   4  751.91   19.82
   0  -9   4  703.12   24.53
   0   9   5  522.76   23.59
   0  -9   5  482.51   21.69
   0   9   5  527.99   19.55
   0  -9   5  552.35   17.04
   0   9   6  154.92   14.00
   0  -9   6  140.37   11.67
   0  -9   6  159.93    9.71
   0   9   6  142.55   10.74
   0   9   7    3.79    5.81
   0  -9   7   -0.09    4.70
   0  -9   7    2.41    3.76
   0   9   7    2.00    3.83
   0   9   8   11.68    6.86
   0   9   8   15.87    5.54
   0  -9   8    8.97    4.46
   0  -9   8   19.82    5.15
   0   9   9  736.73   25.46
   0   9   9  725.30   33.18
   0   9  10   31.94    6.89
   0   9  10   22.16    6.90
   0   9  11   83.56   12.39
   0   9  11  100.80   10.39
   0   9  12   19.25    8.54
   0   9  12   21.05    5.55
   0   9  13  339.12   24.88
   0  -9  13  309.12   25.05
   0   9  13  303.51   18.44
   0   9  14   21.96    7.44
   0  -9  14   20.38    8.20
   0   9  14   19.69    6.41
   0   9  15   62.62   12.65
   0  -9  15   78.82   15.77
   0   9  15   79.67   11.15
   0  -9  16   29.86   10.15
   0   9  16   32.43   10.22
   0   9  16   14.85    6.26
   0   9  17   73.41   11.32
   0   9  17   96.46   16.32
   0  -9  17   93.51   17.53
   0  -9  18   35.83   12.86
   0   9  18   30.27    9.85
   0   9  18   48.56    9.57
   0  -9  19   24.89   12.44
   0   9  19    9.89    5.70
   0   9  19   11.96    7.86
   0  -9  20    0.78    9.24
   0   9  20    8.02    6.37
   0   9  20    8.89    8.52
   0  -9  21  -17.01    8.86
   0   9  21    0.90    7.85
   0   9  21   -7.36    6.46
   0  -9  22   28.44   11.82
   0   9  22   27.65    8.63
   0   9  23  129.09   16.27
   0  -9  23  145.16   20.72
   0   9  23   95.71   17.31
   0   9  24    5.24   10.54
   0   9  24    6.49    6.40
   0  -9  24   11.61   10.63
   0   9  25   21.49    8.93
   0   9  25   15.45   10.70
   0   9  26    4.23    6.18
   0   9  26    3.80    8.75
   0   9  27   -0.56    8.84
   0   9  27   -6.91    8.08
   0   9  28   26.44    9.01
   0   9  28   28.21   13.79
   0   9  29   13.02   11.36
   0   9  29   18.98    9.28
   0   9  30    0.70   10.73
   0   9  31   15.58   13.43
   0   9  32  -10.86   14.48
   0 -10  -9  115.55   15.27
   0 -10  -8  220.28   19.27
   0 -10  -7  216.41   19.12
   0 -10  -6   -1.02    4.37
   0 -10  -6    0.24    5.58
   0 -10  -5    4.19    5.38
   0 -10  -5    9.99    4.32
   0 -10  -4  775.79   32.26
   0  10  -4  756.56   24.63
   0  10  -3  432.29   19.31
   0  10  -3  463.50   18.06
   0 -10  -3  441.17   24.67
   0  10  -2   -2.50    3.83
   0  10  -2   -0.50    3.10
   0 -10  -2    7.03    3.46
   0 -10  -2    2.13    4.92
   0  10  -1    5.97    3.72
   0 -10  -1    3.33    4.82
   0  10  -1   13.87    4.93
   0 -10  -1    9.05    3.91
   0 -10   0  329.40   18.46
   0  10   0  311.62   16.72
   0  10   0  262.98   13.06
   0 -10   0  308.91   14.14
   0 -10   1   11.44    3.78
   0  10   1    7.49    3.72
   0  10   1    4.70    4.23
   0 -10   1    0.29    4.33
   0  10   2    1.59    4.20
   0  10   2    1.11    3.82
   0 -10   2    1.00    3.83
   0 -10   2   -1.05    2.68
   0 -10   3  515.42   22.81
   0  10   3  492.99   18.29
   0  10   3  454.78   21.66
   0 -10   4  654.07   25.55
   0  10   4  658.70   27.36
   0  10   4  703.34   22.46
   0 -10   4  680.44   19.87
   0 -10   5    1.13    4.35
   0 -10   5   11.15    3.73
   0  10   5   14.09    6.91
   0  10   5   13.24    4.57
   0 -10   6   -0.29    5.42
   0  10   6    3.03    3.84
   0  10   6    7.53    4.53
   0 -10   6    8.98    3.64
   0  10   7  199.63   12.91
   0 -10   7  239.70   12.57
   0  10   7  236.46   17.81
   0  10   8  221.74   14.20
   0  10   8  223.58   18.26
   0 -10   8  224.79   12.67
   0  10   9   94.42    9.77
   0  10   9   92.45   13.45
   0 -10   9  111.02    9.42
   0  10  10  942.78   39.21
   0  10  10  872.85   29.87
   0  10  11    2.58    7.26
   0  10  11    3.77    4.17
   0  10  12   88.82   13.65
   0  10  12   88.01   10.41
   0  10  13  106.48   15.25
   0 -10  13  116.29   16.51
   0  10  13  116.12   11.94
   0  10  14  111.66   12.05
   0 -10  14  100.38   16.23
   0  10  14  112.10   15.63
   0  10  15   38.59    7.85
   0 -10  15   48.00   13.00
   0  10  15   42.37   10.66
   0 -10  16   29.11   11.82
   0  10  16   18.39    8.35
   0  10  16   28.07    7.35
   0  10  17   21.62    7.64
   0 -10  17    9.75    9.37
   0  10  17   25.52   11.20
   0 -10  18   93.31   17.73
   0  10  18   88.42   12.22
   0  10  18   72.28   14.23
   0 -10  19   -1.50    8.94
   0  10  19    7.55    5.30
   0  10  19    0.13    6.72
   0 -10  20  166.37   23.92
   0  10  20  139.24   19.99
   0  10  20  139.45   15.50
   0  10  21   78.33   12.27
   0  10  21   67.36   15.32
   0 -10  21  103.25   19.71
   0 -10  22   25.25   11.11
   0  10  22   25.09   12.93
   0  10  22   39.05    8.85
   0  10  23   -7.96    9.30
   0 -10  23   -1.46    8.86
   0  10  23    7.34    6.40
   0  10  24  -11.50   10.13
   0  10  24    8.32    7.99
   0  10  25   14.11    7.76
   0  10  25  159.99   23.00
   0  10  26   31.55    8.93
   0  10  26   32.92   15.38
   0  10  27   -0.97    7.07
   0  10  27    3.13   11.71
   0  10  28  -15.21   12.08
   0  10  28   19.11    9.10
   0  10  29    6.50    8.36
   0  10  29   -2.73   11.37
   0  10  30   13.64   13.93
   0  10  30  -14.14    9.23
   0  10  31   -1.82   13.58
   0  10  32   23.52   14.91
   0 -11  -7  116.52   15.31
   0 -11  -6  391.62   25.35
   0 -11  -5   74.31   11.27
   0 -11  -4   57.19   10.51
   0 -11  -4   50.99    7.69
   0  11  -4   47.20    7.54
   0 -11  -3    4.02    3.83
   0  11  -3    8.44    5.00
   0 -11  -3    7.52    4.91
   0  11  -3    1.15    4.03
   0 -11  -2  304.61   19.75
   0  11  -2  362.18   18.74
   0  11  -2  346.94   15.81
   0 -11  -2  346.97   16.63
   0 -11  -1   48.45    9.46
   0  11  -1   54.17    8.06
   0  11  -1   46.89    6.44
   0 -11  -1   47.76    6.90
   0  11   0   -4.65    4.76
   0  11   0   -5.36    3.66
   0 -11   0   -0.42    2.85
   0 -11   0   -1.33    5.25
   0 -11   1   53.28    6.48
   0  11   1   57.60    6.80
   0 -11   1   57.39    9.29
   0  11   1   50.39    8.48
   0 -11   2  337.55   14.82
   0  11   2  325.30   15.34
   0  11   2  339.16   19.58
   0 -11   2  327.61   19.27
   0  11   3    0.83    3.59
   0  11   3    4.83    5.23
   0 -11   3    6.48    5.60
   0 -11   3    2.93    3.32
   0  11   4   48.76    6.96
   0 -11   4   42.61    8.82
   0  11   4   42.04    7.78
   0 -11   4   49.11    6.21
   0  11   5   73.62   10.40
   0 -11   5   91.21    7.80
   0 -11   6  379.39   16.00
   0  11   6  413.90   24.71
   0  11   6  412.34   18.76
   0  11   7   97.63   11.90
   0 -11   7  132.14    9.68
   0  11   7  120.67   10.82
   0  11   8  359.96   18.62
   0 -11   8  372.37   16.45
   0  11   9    8.64    6.77
   0 -11   9   11.52    4.33
   0  11   9    3.23    4.88
   0  11  10  319.29   18.40
   0 -11  10  321.48   16.23
   0  11  10  330.70   24.20
   0  11  11  125.17   12.34
   0  11  11  145.07   18.00
   0 -11  11  157.44   12.27
   0  11  12  404.67   28.40
   0  11  12  339.66   20.06
   0  11  13    7.26    6.69
   0  11  13    0.99    3.97
   0  11  14   86.81   10.90
   0 -11  14   51.88   12.83
   0  11  14   69.09   13.09
   0 -11  15   -5.74    8.35
   0  11  15    4.48    6.24
   0  11  15    5.04    4.72
   0  11  16   66.60   10.40
   0 -11  16   56.02   14.85
   0  11  16   59.22   13.42
   0  11  17    0.45    4.47
   0  11  17   -7.92    9.13
   0 -11  17    3.67    9.30
   0 -11  18   89.36   18.88
   0  11  18   88.30   15.67
   0  11  18   94.44   12.57
   0  11  19   31.42   11.68
   0 -11  19   31.57   13.28
   0  11  19   31.33    8.63
   0 -11  20  296.01   30.95
   0  11  20  296.26   22.52
   0  11  20  277.37   27.21
   0 -11  21   31.05   13.06
   0  11  21   63.90   12.17
   0  11  21   75.46   16.62
   0  11  22   16.93    9.65
   0  11  22    5.09    7.45
   0 -11  22   18.32   11.76
   0  11  23   13.26    7.31
   0  11  23   -0.51    8.49
   0 -11  23   24.91   12.45
   0  11  24   -3.70    7.31
   0  11  24   16.16   12.12
   0  11  25  -14.28   11.27
   0  11  25    6.11    6.88
   0  11  26    7.38    7.31
   0  11  26    8.63   10.27
   0  11  27   58.41   16.96
   0  11  27   45.67   10.62
   0  11  28    8.75    8.51
   0  11  28   -8.19   10.10
   0  11  29    3.86   10.51
   0  11  29    6.00    6.53
   0  11  30    9.04    8.57
   0  11  30   -8.00   10.20
   0  11  31    5.01   12.11
   0  11  32   15.76   14.30
   0 -12  -4  254.46   20.92
   0  12  -4  197.06   14.16
   0 -12  -3  170.84   16.95
   0  12  -3  141.82   11.33
   0  12  -3  161.21   13.70
   0  12  -2  410.12   21.07
   0 -12  -2  392.38   18.64
   0  12  -2  397.27   18.01
   0 -12  -2  409.04   24.40
   0  12  -1   81.96    8.69
   0  12  -1   93.12   10.46
   0 -12  -1   80.74    8.90
   0 -12  -1  112.68   14.60
   0 -12   0   18.35    4.64
   0  12   0   16.07    5.77
   0  12   0   19.53    5.91
   0 -12   0   11.36    5.61
   0 -12   1   88.59   11.33
   0  12   1   94.33    8.76
   0 -12   1   86.02    8.45
   0  12   1   87.38   10.29
   0 -12   2  382.86   16.74
   0  12   2  354.13   17.07
   0  12   2  383.67   20.96
   0  12   3  146.73   11.59
   0  12   3  122.79   12.82
   0 -12   3  153.83   10.82
   0 -12   4  219.99   12.63
   0  12   4  189.31   15.67
   0  12   4  231.07   14.10
   0  12   5    9.40    3.92
   0  12   5   18.90    6.81
   0 -12   5   12.31    3.98
   0  12   6   17.76    6.96
   0  12   6   14.69    5.22
   0 -12   6    5.91    3.34
   0 -12   7   30.94    5.43
   0  12   7   24.80    7.46
   0  12   7   32.29    6.66
   0 -12   8   83.90    8.45
   0  12   8   85.80    9.78
   0  12   8   84.83   12.27
   0 -12   9   39.54    6.30
   0  12   9   50.04    8.29
   0  12   9   46.31    9.94
   0 -12  10  115.17   10.18
   0  12  10  110.57   14.43
   0  12  10  117.69   11.76
   0  12  11  316.84   19.11
   0  12  11  375.68   26.50
   0 -12  11  367.62   18.35
   0  12  12   60.57    9.00
   0 -12  12   55.57    8.10
   0  12  12   56.37   11.62
   0  12  13   97.47   14.88
   0 -12  13  114.87   11.07
   0  12  13   85.47   10.53
   0  12  14  246.69   18.40
   0 -12  14  240.18   15.91
   0  12  14  247.01   23.85
   0 -12  15    9.77    8.32
   0  12  15   10.74    7.87
   0  12  15    9.93    4.91
   0 -12  16   -0.67    9.83
   0  12  16    1.86    4.41
   0  12  16   -1.83    8.21
   0  12  17   24.73    8.91
   0 -12  17   39.61   14.51
   0  12  17   15.91    6.23
   0  12  18   24.82    7.58
   0 -12  18   20.26   11.65
   0  12  18   25.18   11.51
   0  12  19    4.31    5.09
   0 -12  19   10.86   11.20
   0  12  19   13.97   12.25
   0 -12  20   89.31   19.75
   0  12  20   60.69   14.40
   0  12  20   74.96   12.24
   0  12  21  276.51   22.34
   0 -12  21  274.10   31.04
   0  12  21  193.08   25.00
   0 -12  22   58.31   16.35
   0  12  22   40.34    9.92
   0  12  22   11.11   11.59
   0  12  23   42.07    9.75
   0  12  23   29.90   12.70
   0  12  24   16.90   10.30
   0  12  24    6.26    6.38
   0  12  25   21.52   12.67
   0  12  25   -4.86    7.25
   0  12  26   -3.66    6.16
   0  12  26   -1.11   10.78
   0  12  27   29.07   10.56
   0  12  27   25.31   14.90
   0  12  28    7.41   11.22
   0  12  28   -2.06    7.19
   0  12  29   12.47    9.97
   0  12  29   53.17   13.80
   0  12  30    2.83    6.99
   0  12  30   -2.36   13.03
   0  12  31   14.17   14.66
   0  13  -5  376.91   20.36
   0  13  -4   63.37    9.13
   0  13  -3   61.49    9.16
   0  13  -3   39.80    6.81
   0  13  -2  516.93   21.32
   0  13  -2  644.72   26.41
   0  13  -1    2.47    4.33
   0  13  -1   -0.72    5.08
   0  13   0   -4.11    4.67
   0  13   0    2.72    4.21
   0  13   1    5.58    3.35
   0  13   1    5.02    5.61
   0  13   2  587.19   27.21
   0 -13   2  604.24   21.90
   0  13   2  624.89   22.92
   0  13   3   53.33    8.99
   0 -13   3   50.16    7.15
   0  13   3   48.62    7.05
   0  13   4   86.57    9.44
   0 -13   4   89.87    8.99
   0  13   4   85.74   11.33
   0  13   5  396.31   23.04
   0  13   5  429.22   19.81
   0 -13   5  395.33   17.98
   0  13   6   62.72    7.94
   0  13   6   67.73   10.70
   0 -13   6   56.76    7.04
   0  13   7  616.84   32.73
   0 -13   7  539.42   20.40
   0  13   8  562.48   24.07
   0 -13   8  601.04   22.06
   0  13   8  578.84   30.99
   0 -13   9  134.59   11.10
   0  13   9  138.57   16.34
   0  13   9  137.24   12.53
   0  13  10   -2.30    5.23
   0 -13  10    0.18    3.04
   0  13  10    5.42    4.62
   0  13  11    5.98    5.68
   0  13  11    4.47    3.59
   0 -13  11   -4.45    4.29
   0  13  12   22.45    6.65
   0 -13  12   36.35    6.96
   0  13  12   29.62    9.32
   0  13  13  107.52   16.25
   0  13  13   87.79   11.31
   0 -13  13   97.11   10.48
   0  13  14   59.53    9.45
   0 -13  14   49.89    7.95
   0  13  14   44.98   12.34
   0  13  15   44.84   10.89
   0 -13  15   61.01    9.12
   0  13  15   42.19    8.00
   0 -13  16   -0.39    9.11
   0  13  16   -4.60    5.86
   0  13  16  -10.49    8.88
   0 -13  17    9.48    9.51
   0  13  17   14.72    9.09
   0  13  17    6.34    5.45
   0  13  18   37.90   12.70
   0  13  18   29.91    8.19
   0 -13  18   19.42   12.04
   0  13  19   37.40    8.40
   0  13  19   52.80   14.17
   0 -13  19   48.09   17.15
   0  13  20    1.76    8.07
   0 -13  20    3.50   11.81
   0  13  20    7.04    6.06
   0 -13  21    4.99   11.47
   0  13  21    0.42    5.64
   0  13  21    9.78    9.92
   0  13  22    8.51    7.01
   0  13  22    4.77    8.92
   0 -13  22   -2.03   11.84
   0  13  23   15.98   12.48
   0  13  23    8.47    5.70
   0  13  24   28.14   12.88
   0  13  24   40.79   10.28
   0  13  25   64.72   12.07
   0  13  25   46.04   17.71
   0  13  26    6.97    8.63
   0  13  26   11.54   12.75
   0  13  27   23.71   14.29
   0  13  27   11.56    8.70
   0  13  28   20.78   11.01
   0  13  28   12.34   13.06
   0  13  29   -2.97    6.85
   0  13  29    6.20   11.62
   0  13  30   -8.70   12.73
   0  13  30   10.92    7.99
   0  13  31    1.12   12.40
   0  14  -5  349.11   20.07
   0  14  -4  521.87   24.46
   0  14  -3   81.14   11.24
   0  14  -3   74.58    9.49
   0  14  -2  954.15   33.10
   0  14  -2  778.20   27.96
   0  14  -1  245.88   17.63
   0  14  -1  238.98   15.14
   0  14   0  275.60   16.27
   0  14   0  259.63   17.88
   0  14   1  217.41   14.98
   0  14   1  226.79   17.27
   0  14   2  833.50   27.44
   0  14   2  891.92   34.06
   0  14   3   67.17    8.38
   0  14   3   87.22   12.02
   0  14   4  548.62   28.19
   0  14   4  589.92   23.85
   0  14   5  368.05   23.15
   0  14   5  311.57   17.58
   0  14   6  396.82   24.33
   0  14   6  369.70   19.58
   0  14   7  218.38   15.39
   0  14   7  174.81   17.21
   0  14   8   50.17    8.37
   0  14   8   58.73   12.06
   0  14   9  241.85   21.33
   0  14   9  235.85   16.48
   0  14  10   30.29    6.85
   0  14  10   31.21    8.67
   0  14  11   40.07    9.99
   0  14  11   43.88    8.02
   0  14  12    9.58    7.66
   0  14  12    9.51    5.54
   0  14  13   -3.36    6.72
   0  14  13   -1.23    4.36
   0  14  14   10.75    7.50
   0  14  14    3.12    4.64
   0  14  15   68.92   15.13
   0  14  15   64.81   10.24
   0  14  16  166.71   21.32
   0 -14  16  142.71   22.28
   0  14  16  139.30   15.32
   0 -14  17    7.83   12.72
   0  14  17   11.43    5.86
   0  14  17   21.24    8.67
   0  14  18   95.30   17.75
   0 -14  18   67.71   19.10
   0  14  18   62.13   10.96
   0 -14  19   27.82   14.23
   0  14  19    9.53    5.64
   0  14  19   17.57    9.03
   0  14  20   13.59   10.24
   0  14  20    5.30    6.26
   0 -14  20    5.43   10.42
   0  14  21   31.99    8.31
   0  14  21   39.88   14.47
   0 -14  21   53.05   16.97
   0  14  22   10.75    7.08
   0  14  22    9.18    9.37
   0  14  23   34.40   14.04
   0  14  23    5.58    5.86
   0  14  24   22.01   14.14
   0  14  24   18.46    7.20
   0  14  25   10.34   10.54
   0  14  25    8.73    6.74
   0  14  26    9.73   10.53
   0  14  26   51.64   12.27
   0  14  27    1.85   12.41
   0  14  27   13.08    9.74
   0  14  28    3.66   10.75
   0  14  28   -0.15    8.40
   0  14  29    6.76    7.56
   0  14  29   -1.07   11.89
   0  14  30   -5.29   10.24
   0  14  30   20.03   16.36
   0  14  31    8.47   16.76
   0  15  -5  612.74   27.29
   0  15  -4 1245.48   39.13
   0  15  -3   11.67    6.69
   0  15  -3    3.40    4.24
   0  15  -2  109.23   12.96
   0  15  -2   92.49   10.78
   0  15  -1   42.47    7.04
   0  15  -1   45.42    8.40
   0  15   0    0.27    3.34
   0  15   0    7.26    5.71
   0  15   1   52.63    9.02
   0  15   1   45.23    7.25
   0  15   2  104.45   10.97
   0  15   2   97.18   12.12
   0  15   3    1.07    4.36
   0  15   3    4.81    4.77
   0  15   4 1363.98   37.67
   0  15   4 1488.07   46.09
   0  15   5  730.13   33.05
   0  15   5  779.52   28.42
   0  15   6    0.90    3.80
   0  15   6   -2.05    5.85
   0  15   7   24.86    5.90
   0  15   7   22.64    8.25
   0  15   8   25.40    8.47
   0  15   8   30.26    6.88
   0  15   9   46.80    8.43
   0  15   9   62.98   14.36
   0  15  10    2.84    6.32
   0  15  10    2.57    3.79
   0  15  11  107.86   12.36
   0  15  11  129.01   16.81
   0  15  12    1.02    5.55
   0  15  12    1.72    5.97
   0  15  13   26.76    9.46
   0  15  13   20.13    6.65
   0  15  14    5.92    8.43
   0  15  14    1.12    4.49
   0  15  15    5.30    7.74
   0  15  15    5.92    5.83
   0  15  16  126.60   17.83
   0  15  16  119.95   13.95
   0 -15  17    6.48   11.57
   0  15  17    5.54    4.98
   0  15  17    9.59    8.97
   0  15  18   -1.12    8.22
   0 -15  18    8.48   12.00
   0  15  18   -4.35    6.54
   0  15  19   36.32    8.63
   0  15  19   38.90   11.82
   0 -15  19   27.25   14.09
   0  15  20   36.50   15.14
   0  15  20   10.19    6.75
   0 -15  20   18.65   15.10
   0  15  21   38.39   13.78
   0  15  21   26.80    8.97
   0 -15  21   15.71   13.92
   0  15  22   26.93    8.91
   0  15  22   -1.92    8.17
   0  15  23    1.14    6.48
   0  15  23   17.20   12.85
   0  15  24    0.35    5.86
   0  15  24   -4.39   12.43
   0  15  25   19.29    8.72
   0  15  25   24.64   15.68
   0  15  26   10.07   16.31
   0  15  27   -6.17   11.60
   0  15  27   -2.46    8.11
   0  15  28   -6.97    7.43
   0  15  28   -4.26   12.63
   0  15  29   -8.45    8.26
   0  15  29    5.89   13.38
   0  15  30   28.14   16.89
   0  15  30    7.56    8.07
   0  16  -5   87.17   11.08
   0  16  -4    2.14    4.22
   0  16  -3   18.31    6.05
   0  16  -3   44.26    9.36
   0  16  -2  185.23   16.09
   0  16  -2  177.36   14.88
   0  16  -1  155.43   15.54
   0  16  -1  167.93   13.97
   0  16   0  322.66   18.78
   0  16   0  359.58   22.26
   0  16   1  155.45   13.21
   0  16   1  165.00   15.90
   0  16   2  165.51   14.10
   0  16   2  158.65   16.29
   0  16   3   20.26    6.24
   0  16   3   15.65    7.58
   0  16   4   -4.44    4.80
   0  16   4    3.50    6.07
   0  16   5   95.68   11.23
   0  16   5  104.10   13.32
   0  16   6   12.26    7.29
   0  16   6    5.34    4.04
   0  16   7   -7.10    4.44
   0  16   7    1.31    5.77
   0  16   8  124.73   13.08
   0  16   8  131.87   15.64
   0  16   9   19.35    6.23
   0  16   9   26.33    9.36
   0  16  10   -9.73    6.17
   0  16  10    2.68    4.21
   0  16  11   30.90    7.97
   0  16  11   15.98    8.39
   0  16  12    2.70    5.90
   0  16  12   10.18    4.90
   0  16  13   60.44   10.16
   0  16  13   73.24   13.81
   0  16  14   -1.86    4.71
   0  16  14   11.09    8.18
   0  16  15    6.45    6.70
   0  16  15   -2.25    5.87
   0  16  16   23.53    6.67
   0  16  16   27.75    9.69
   0 -16  17   22.80   14.06
   0  16  17   35.33   14.15
   0  16  17   25.44    7.44
   0 -16  18   11.37   13.22
   0  16  18   34.15    9.16
   0  16  18   42.43   13.34
   0  16  19   24.67    7.51
   0 -16  19   28.70   14.78
   0  16  19   17.92    8.18
   0  16  20   27.13    9.20
   0 -16  20   38.43   15.35
   0  16  20   19.01    8.30
   0 -16  21  -21.57   19.16
   0  16  21    0.53    5.73
   0  16  21    0.85    9.78
   0  16  22   72.30   18.77
   0  16  22   62.13   12.51
   0  16  23    0.31    5.59
   0  16  23    5.83   11.10
   0  16  24    9.93    6.25
   0  16  24    2.05   12.40
   0  16  25    7.70   13.28
   0  16  25    6.76    7.95
   0  16  26    0.65    7.82
   0  16  26    4.36   13.77
   0  16  27   -6.15   12.79
   0  16  27   -1.29    8.96
   0  16  28   27.43   11.14
   0  16  28   10.11   15.22
   0  16  29    0.57   12.33
   0  16  29    7.81   10.27
   0  16  30    7.03   15.34
   0  16  30   24.07   11.32
   0  16  31   19.02   11.36
   0  17  -5    3.51    4.18
   0  17  -4   12.21    6.84
   0  17  -3   75.93   11.71
   0  17  -3   55.98    9.47
   0  17  -2   -1.81    4.96
   0  17  -2   -4.23    4.58
   0  17  -1   13.61    6.94
   0  17  -1   25.84    6.63
   0  17   0    3.34    6.31
   0  17   0   -1.41    3.54
   0  17   1   28.16    6.62
   0  17   1   24.71    7.05
   0  17   2   -1.62    5.51
   0  17   2    9.90    5.99
   0  17   3   56.54    8.58
   0  17   3   72.98   11.71
   0  17   4   13.54    5.35
   0  17   4    5.75    5.64
   0  17   5    2.65    4.05
   0  17   5    5.43    6.60
   0  17   6    2.67    6.70
   0  17   6    8.80    6.01
   0  17   7   30.26    7.03
   0  17   7   38.70   10.15
   0  17   8    2.93    4.48
   0  17   8    8.18    7.71
   0  17   9    0.81    5.40
   0  17   9   -1.44    3.97
   0  17  10   44.69   10.96
   0  17  10   33.00    7.87
   0  17  11   27.61    9.80
   0  17  11   33.40    7.64
   0  17  12   20.36    6.86
   0  17  12   16.30    8.19
   0  17  13   53.12    9.86
   0  17  13   49.94   12.32
   0  17  14   -5.36    7.85
   0  17  14    0.78    5.04
   0  17  15   19.36    9.04
   0  17  15   13.29    6.11
   0  17  16  347.90   29.96
   0  17  16  377.43   25.38
   0  17  17    7.66    6.58
   0  17  17   -0.78    7.59
   0  17  18    1.13    5.67
   0  17  18    8.51    8.67
   0 -17  18    5.85   11.77
   0  17  19   20.10    8.03
   0  17  19   30.82   12.90
   0 -17  20   34.43   17.88
   0  17  20   27.56    9.61
   0  17  20   17.71   11.05
   0  17  21    7.06   10.06
   0  17  21    4.52    6.15
   0  17  22   16.47   11.77
   0  17  22    0.97    5.87
   0  17  23    0.44    7.42
   0  17  23   16.68   12.32
   0  17  24    0.92    7.90
   0  17  24    7.63   10.42
   0  17  25   -2.30    9.09
   0  17  25    1.84    7.73
   0  17  26   -5.74   11.55
   0  17  26   -3.80    8.14
   0  17  27   14.30   10.59
   0  17  27   33.13   17.89
   0  17  28    3.26   10.69
   0  17  28   13.30    8.62
   0  17  29    0.46    8.75
   0  17  29    6.43   11.69
   0  17  30    0.39    7.95
   0  17  31   37.94   14.79
   0  18  -5    6.88    6.33
   0  18  -4  126.20   14.74
   0  18  -3  121.42   13.47
   0  18  -3  142.67   15.60
   0  18  -2  176.16   16.00
   0  18  -2  164.15   16.50
   0  18  -1   -8.70    6.04
   0  18  -1   -4.30    3.98
   0  18   0   38.90    7.99
   0  18   0   30.93    8.55
   0  18   1   -7.01    5.48
   0  18   1    2.68    3.87
   0  18   2  170.90   17.16
   0  18   2  158.12   14.31
   0  18   3  114.79   12.76
   0  18   3  119.92   14.82
   0  18   4  131.14   16.27
   0  18   4  136.03   13.42
   0  18   5    4.21    5.96
   0  18   5   -0.78    3.96
   0  18   6   21.06    7.13
   0  18   6    2.60    5.24
   0  18   7    0.58    5.64
   0  18   7    3.48    4.53
   0  18   8    3.42    5.54
   0  18   8   -0.90    4.93
   0  18   9   -0.17    4.96
   0  18   9    3.15    5.48
   0  18  10   93.50   12.57
   0  18  10   97.27   15.66
   0  18  11    7.26    5.63
   0  18  11    8.52    8.66
   0  18  12   58.22   10.52
   0  18  12   49.37   12.15
   0  18  13  405.88   33.71
   0  18  13  372.00   24.23
   0  18  14    5.01    5.99
   0  18  14    1.49    8.78
   0  18  15    3.27    7.68
   0  18  15    7.25    5.14
   0  18  16    6.24    5.32
   0  18  16  -10.24    8.78
   0  18  17    2.31    7.18
   0  18  17    4.21    6.88
   0  18  18    4.83    5.32
   0  18  18    7.21    9.77
   0  18  19    2.81    6.88
   0 -18  19   12.05   15.91
   0  18  19   -2.36    7.70
   0  18  20   12.89    8.01
   0  18  20   20.04    8.73
   0 -18  20   14.99   15.66
   0  18  21    7.12    6.90
   0  18  21    4.44    9.24
   0  18  22   42.57   14.73
   0  18  22   30.08   10.83
   0  18  23    4.68    6.72
   0  18  23   22.64   13.41
   0  18  24   13.04   11.36
   0  18  24    4.15    7.67
   0  18  25    3.42    8.71
   0  18  25    3.01   11.37
   0  18  26  -16.49   14.06
   0  18  26  -12.16   10.38
   0  18  27   24.24   14.53
   0  18  27   -0.19    7.57
   0  18  28   -9.39   12.74
   0  18  28   -7.68    8.67
   0  18  29   -7.23    8.40
   0  18  29  -17.70   15.09
   0  18  30    3.36    8.91
   0  19  -5   48.77    9.49
   0  19  -4   21.67    6.23
   0  19  -3   38.74    9.79
   0  19  -2   21.40    8.13
   0  19  -2   18.74    6.89
   0  19  -1   16.51    6.68
   0  19  -1    6.20    4.75
   0  19   0    0.14    4.22
   0  19   0    6.97    6.93
   0  19   1   13.48    6.29
   0  19   1   19.28    8.18
   0  19   2   26.32    7.33
   0  19   2   22.76    6.83
   0  19   3   19.50    6.13
   0  19   3   25.06    7.78
   0  19   4   20.35    6.34
   0  19   4   15.35    6.11
   0  19   5   41.91   10.34
   0  19   5   53.68    9.55
   0  19   6    2.72    6.77
   0  19   6   -1.90    4.28
   0  19   7   54.60    9.58
   0  19   7   55.81   11.74
   0  19   8  348.09   26.75
   0  19   8  313.47   21.73
   0  19   9   70.46   11.01
   0  19   9   65.64   12.54
   0  19  10   -4.21    6.51
   0  19  10    1.16    5.05
   0  19  11  107.01   16.50
   0  19  11  107.59   14.06
   0  19  12   27.90    7.20
   0  19  12   36.16   11.51
   0  19  13   85.59   15.90
   0  19  13   88.91   14.07
   0  19  14    7.97    6.82
   0  19  14    9.67    7.34
   0  19  15    7.10    5.91
   0  19  15    6.75   10.82
   0  19  16   -4.81    9.76
   0  19  16    3.95    6.08
   0  19  17   14.77    8.49
   0  19  17    5.16    7.55
   0  19  18    5.05    6.30
   0  19  18   -1.47    9.41
   0  19  19   14.57    8.23
   0 -19  19   -1.89   14.70
   0  19  19   27.35   12.13
   0  19  20   18.41    7.69
   0  19  20   10.51    9.90
   0  19  21   13.10    7.88
   0  19  21    0.60    6.39
   0  19  22   34.11   11.66
   0  19  22   25.75   12.73
   0  19  23    2.56    7.40
   0  19  23   -5.45    9.05
   0  19  24   -7.99    9.10
   0  19  24    2.16    7.41
   0  19  25    3.22    7.09
   0  19  25   22.05   13.33
   0  19  26    4.45   10.31
   0  19  26    9.03   10.18
   0  19  27  -18.51   13.77
   0  19  27   -0.31    8.96
   0  19  28   29.63   13.83
   0  19  28   59.17   18.86
   0  19  29    8.19    9.41
   0  19  30   -6.34    9.38
   0  20  -5   28.13    8.48
   0  20  -4  115.95   14.74
   0  20  -3  158.77   16.84
   0  20  -2    5.69    6.54
   0  20  -2   -2.44    6.52
   0  20  -1  168.11   17.41
   0  20  -1  152.31   15.36
   0  20   0   -2.97    6.34
   0  20   0    3.34    4.37
   0  20   1  155.89   15.68
   0  20   1  130.19   15.93
   0  20   2    4.99    5.64
   0  20   2    8.07    5.77
   0  20   3  150.10   16.91
   0  20   3  139.70   14.49
   0  20   4  100.75   14.35
   0  20   4   93.15   12.37
   0  20   5   28.05    9.33
   0  20   5   16.11    4.99
   0  20   6   47.21    9.15
   0  20   6   39.29   11.14
   0  20   7    4.38    5.72
   0  20   7    6.47    5.01
   0  20   8   92.80   12.18
   0  20   8  108.50   16.11
   0  20   9   -4.53    5.48
   0  20   9    8.91    7.36
   0  20  10  204.91   18.48
   0  20  10  214.20   23.22
   0  20  11   13.81    7.79
   0  20  11   17.19    9.54
   0  20  12  230.64   23.51
   0  20  12  261.53   21.24
   0  20  13   10.76    5.25
   0  20  13   23.70   12.03
   0  20  14  267.10   22.26
   0  20  14  254.20   26.24
   0  20  15    8.11    5.96
   0  20  15   27.18   11.63
   0  20  16   16.49    6.92
   0  20  16   -6.34    9.09
   0  20  17   65.23   16.62
   0  20  17   41.49   10.50
   0  20  18   13.68   12.09
   0  20  18    5.43    6.26
   0 -20  19    4.82   15.31
   0  20  19    8.68    8.43
   0  20  19    6.13    7.62
   0  20  20   25.99   11.34
   0  20  20   25.93   10.83
   0  20  21   29.48   13.18
   0  20  21    7.85    6.35
   0  20  22   -5.16    7.85
   0  20  22   -9.14   10.67
   0  20  23   11.02    9.48
   0  20  23   17.27   10.16
   0  20  24   -3.01    6.93
   0  20  24   12.70   11.42
   0  20  25    1.06    7.83
   0  20  25   -7.51    9.39
   0  20  26   15.48   13.17
   0  20  26    1.11    7.32
   0  20  27   14.04   10.82
   0  20  27    1.51   10.41
   0  20  28   20.96   10.61
   0  20  28   11.52   12.08
   0  20  29    2.44    9.12
   0  21  -5  116.75   15.29
   0  21  -4  215.89   19.90
   0  21  -3  177.30   18.14
   0  21  -2   -2.54    7.16
   0  21  -2    2.43    5.73
   0  21  -1    4.10    6.38
   0  21  -1   -1.62    5.17
   0  21   0   -4.03    5.75
   0  21   0    4.47    5.96
   0  21   1   -4.44    5.46
   0  21   1   -1.58    7.91
   0  21   2   12.67    7.31
   0  21   2    1.20    5.60
   0  21   3  178.80   17.18
   0  21   3  181.84   18.71
   0  21   4  218.18   20.96
   0  21   4  210.73   18.25
   0  21   5  117.63   14.30
   0  21   5  105.97   15.96
   0  21   6    3.51    7.76
   0  21   6    2.61    4.96
   0  21   7   60.26   10.87
   0  21   7   53.26   12.47
   0  21   8   84.19   14.73
   0  21   8   94.87   12.83
   0  21   9   62.62   13.34
   0  21   9   50.51   10.23
   0  21  10  119.83   17.83
   0  21  10   92.45   13.38
   0  21  11   20.39    7.58
   0  21  11   27.87   11.99
   0  21  12  195.77   22.69
   0  21  12  224.97   20.25
   0  21  13   12.47    9.18
   0  21  13   12.45    7.00
   0  21  14   70.01   15.25
   0  21  14   52.52   10.91
   0  21  15   16.99   10.65
   0  21  15   28.27    9.40
   0  21  16    3.37    7.35
   0  21  16   11.83    7.96
   0  21  17    2.87    7.56
   0  21  17    1.08    7.39
   0  21  18   20.46    8.68
   0  21  18    4.12    9.33
   0  21  19   39.20   10.49
   0  21  19   55.66   17.37
   0  21  20   17.32    9.19
   0  21  20   32.83   10.47
   0  21  21   -3.97    9.33
   0  21  21   -0.65    6.95
   0  21  22   23.28   13.00
   0  21  22   19.31    9.58
   0  21  23   -2.09    7.21
   0  21  23   -8.34   12.31
   0  21  24    1.66    7.10
   0  21  24    5.49   13.06
   0  21  25    6.62    9.48
   0  21  25   -4.17   10.78
   0  21  26   20.40   17.61
   0  21  26  -14.18   13.81
   0  21  27   10.51   10.21
   0  21  27   37.78   16.98
   0  21  28   19.62    9.23
   0  22  -5  246.47   21.37
   0  22  -4   22.60    8.35
   0  22  -3   99.74   14.21
   0  22  -2   13.24    7.91
   0  22  -1  297.73   23.00
   0  22  -1  273.00   23.54
   0  22   0  214.54   21.10
   0  22   0  237.49   21.03
   0  22   1  251.76   23.16
   0  22   1  280.87   21.81
   0  22   2    0.72    5.91
   0  22   2    8.76    6.07
   0  22   3   73.29   11.75
   0  22   3  104.96   16.13
   0  22   4   16.16    8.61
   0  22   4    6.63    7.04
   0  22   5  241.73   23.12
   0  22   5  257.10   21.07
   0  22   6   29.40    9.15
   0  22   6   26.06    9.94
   0  22   7  191.25   21.47
   0  22   7  160.85   17.45
   0  22   8   69.05   14.45
   0  22   8   74.07   11.76
   0  22   9   23.92   11.19
   0  22   9   13.46    6.94
   0  22  10   24.08    8.36
   0  22  10   29.51   10.04
   0  22  11   37.81   11.40
   0  22  11   32.96    9.56
   0  22  12    5.27    6.40
   0  22  12    8.66    8.40
   0  22  13    5.90    6.19
   0  22  13   24.18   12.13
   0  22  14   41.26   11.70
   0  22  14   37.64    9.96
   0  22  15   31.38   11.78
   0  22  15    8.65    6.58
   0  22  16    3.02    7.49
   0  22  16    0.76    5.73
   0  22  17   19.32    9.50
   0  22  17   16.78    8.81
   0  22  18    4.84    8.03
   0  22  18   -4.54    6.33
   0  22  19   96.05   14.78
   0  22  19   74.41   17.25
   0  22  20   14.41    8.31
   0  22  20    3.53   10.37
   0  22  21   72.58   20.05
   0  22  21   23.45    9.25
   0  22  22   13.32   10.50
   0  22  22    6.90   10.75
   0  22  23    4.66    9.10
   0  22  23  -12.27   12.52
   0  22  24    5.30   11.21
   0  22  24    7.74    8.48
   0  22  25   50.80   13.24
   0  22  25   33.77   16.48
   0  22  26   10.49   14.64
   0  22  26   -7.45    9.53
   0  22  27    4.44    8.63
   0  22  27   -9.12   13.87
   0  23  -4  262.62   22.78
   0  23  -3   -9.33    7.72
   0  23  -2   14.21    8.34
   0  23  -1   52.86   12.32
   0  23  -1   55.21   11.43
   0  23   0   -0.44    7.44
   0  23   0    2.39    5.73
   0  23   1   49.18   11.99
   0  23   1   51.49   11.48
   0  23   2   11.25    5.98
   0  23   2   24.74    9.66
   0  23   3    4.64    6.06
   0  23   3   -4.14    7.26
   0  23   4  232.41   22.57
   0  23   4  245.44   21.22
   0  23   5   62.56   10.88
   0  23   5   49.36   10.91
   0  23   6   56.50   11.35
   0  23   6   70.23   14.29
   0  23   7   77.52   15.02
   0  23   7   75.16   12.83
   0  23   8   -9.52    6.59
   0  23   8    4.76    8.57
   0  23   9    1.99    5.47
   0  23   9    4.86    9.37
   0  23  10    6.88    8.07
   0  23  10   -3.88    5.76
   0  23  11   67.96   14.49
   0  23  11   71.44   12.68
   0  23  12   52.35   13.82
   0  23  12   45.89   10.96
   0  23  13   53.07   10.88
   0  23  13   67.96   14.20
   0  23  14   13.00    9.09
   0  23  14   17.41    8.48
   0  23  15   15.50    8.49
   0  23  15   26.66   11.37
   0  23  16   35.98    9.98
   0  23  16   30.25   11.98
   0  23  17   -8.05    8.62
   0  23  18   18.51   10.77
   0  23  18   10.55    7.19
   0  23  19    5.33    9.02
   0  23  19   16.09   11.99
   0  23  20   41.53   11.70
   0  23  20   14.41   11.31
   0  23  21   -3.05    8.36
   0  23  21    1.63    8.77
   0  23  22   15.28   10.89
   0  23  22   -3.56   10.82
   0  23  23   30.28   13.09
   0  23  23    8.52    8.42
   0  23  24    3.43    8.11
   0  23  24   10.00   13.72
   0  23  25   14.83   12.48
   0  23  25    7.91    8.85
   0  23  26    6.40    8.58
   0  23  26   12.93   13.53
   0  24  -4  118.49   16.86
   0  24  -3   36.33   10.77
   0  24  -2   82.40   14.12
   0  24  -1   -0.72    7.16
   0  24  -1   -4.45    7.18
   0  24   0    3.18    6.02
   0  24   0   -9.39    8.12
   0  24   1    7.40    6.73
   0  24   1   13.72    7.94
   0  24   2   72.10   12.32
   0  24   2   70.23   13.62
   0  24   3   53.81   12.97
   0  24   3   27.27    8.27
   0  24   4  135.38   18.91
   0  24   4  141.27   16.60
   0  24   5   80.12   13.23
   0  24   5   92.35   15.84
   0  24   6   13.96    8.27
   0  24   6    8.32    7.94
   0  24   7   21.92   10.40
   0  24   7   25.13   10.15
   0  24   8   -5.32    7.31
   0  24   8    1.07    5.65
   0  24   9   22.27   10.39
   0  24   9   23.78    8.22
   0  24  10    3.09    6.82
   0  24  10    8.90   11.22
   0  24  11    6.01    6.63
   0  24  11    7.55    8.08
   0  24  12   -3.12    8.22
   0  24  12    8.30    7.69
   0  24  13    5.32    8.36
   0  24  13    1.28    6.65
   0  24  14   -4.49    8.73
   0  24  14    2.50    6.70
   0  24  15    3.23    8.42
   0  24  15   11.72    8.18
   0  24  16   17.33    8.41
   0  24  16   13.11   10.11
   0  24  17   23.31    9.26
   0  24  17    8.90    8.84
   0  24  18    4.70    6.12
   0  24  18  -11.99    9.86
   0  24  19   55.88   15.53
   0  24  19   46.57   11.87
   0  24  20   -5.96    6.57
   0  24  20   12.33   12.37
   0  24  21   12.38    9.10
   0  24  21   11.98   11.18
   0  24  22   -3.94    7.39
   0  24  22    2.24   12.54
   0  24  23    1.79    7.16
   0  24  23    2.82   11.73
   0  24  24    2.40   11.06
   0  24  24   13.64    9.65
   0  24  25   20.31   11.03
   0  24  25   23.00   15.75
   0  24  26   30.79   15.94
   0  25  -4   19.71    8.62
   0  25  -3    6.62    7.67
   0  25  -2   15.90    7.58
   0  25  -1   -0.29    6.73
   0  25   0    9.48    7.80
   0  25   0    2.97    5.45
   0  25   1   -2.00    5.72
   0  25   1    2.33    7.84
   0  25   2   36.72   11.06
   0  25   2   29.89   11.11
   0  25   3    1.51    7.54
   0  25   3    1.10    7.92
   0  25   4   13.96    7.31
   0  25   4   -4.13    7.54
   0  25   5   -0.65    6.50
   0  25   5    1.39    8.01
   0  25   6    3.51    7.06
   0  25   6    7.53    6.50
   0  25   7   66.47   14.72
   0  25   7   47.88   11.67
   0  25   8    1.37    7.88
   0  25   8    0.35    5.78
   0  25   9   64.82   12.53
   0  25   9   56.92   14.17
   0  25  10  108.04   16.10
   0  25  10  122.41   18.91
   0  25  11   53.90   14.44
   0  25  11   22.48    9.06
   0  25  12   -1.57    9.78
   0  25  12    1.45    6.57
   0  25  13   20.72   11.12
   0  25  13   12.41    7.98
   0  25  14   47.84   14.54
   0  25  14   31.23   10.62
   0  25  15   12.94   10.20
   0  25  15    8.78    6.71
   0  25  16   13.62   11.31
   0  25  16   -1.44    7.34
   0  25  17   37.77   11.60
   0  25  17   42.05   13.17
   0  25  18    8.20    8.75
   0  25  18   12.12    8.95
   0  25  19  -13.61    9.46
   0  25  19   32.60   13.74
   0  25  20    2.18    7.42
   0  25  20   12.70   11.35
   0  25  21   21.12   10.12
   0  25  21    5.78    9.53
   0  25  22   61.66   19.11
   0  25  22   83.12   16.29
   0  25  23   16.26   10.23
   0  25  23   25.56   13.61
   0  25  24   31.65   14.07
   0  25  25   24.66   14.98
   0  26  -4    3.06    7.66
   0  26  -3    3.08    6.21
   0  26  -2   76.61   13.97
   0  26  -1  126.26   18.23
   0  26   0    7.74    6.12
   0  26   0   21.12    9.98
   0  26   1  138.84   17.82
   0  26   1  119.11   17.60
   0  26   2   86.64   15.05
   0  26   2   87.81   16.05
   0  26   3    7.28    8.39
   0  26   3   -0.07    7.38
   0  26   4   -0.83    6.28
   0  26   4    4.09    7.03
   0  26   5   36.94   10.86
   0  26   5   34.67    9.66
   0  26   6   -0.69    8.26
   0  26   6    8.80    8.15
   0  26   7   37.41   12.15
   0  26   7   30.59   10.19
   0  26   8   41.43   12.27
   0  26   8   59.26   12.28
   0  26   9   13.36    6.98
   0  26   9   21.63   10.87
   0  26  10   -6.65    7.03
   0  26  10   -3.40   10.34
   0  26  11  143.18   21.38
   0  26  11  130.63   17.99
   0  26  12   -7.87    9.08
   0  26  12   22.01    8.82
   0  26  13    9.27    9.21
   0  26  13  -14.16   11.34
   0  26  14   12.09   10.24
   0  26  14   -3.67    8.09
   0  26  15   -4.78    8.04
   0  26  15  -17.74    9.82
   0  26  16   53.38   14.42
   0  26  16   52.67   13.22
   0  26  17   -0.35    6.61
   0  26  17   -2.28    9.29
   0  26  18    1.18    8.71
   0  26  18  -14.74    9.07
   0  26  19   31.48   12.54
   0  26  19    8.55    9.23
   0  26  20   10.46   11.74
   0  26  20    0.89    8.58
   0  26  21   20.82   10.45
   0  26  21   38.38   14.04
   0  26  22   -1.60    8.52
   0  26  22   19.54   10.76
   0  26  23    3.26   10.41
   0  26  24   -7.66   10.72
   0  27  -3    1.95    7.41
   0  27  -2   14.67    7.72
   0  27  -1  -14.38    8.75
   0  27   0    0.79    6.86
   0  27   1   -2.84    7.60
   0  27   1  -14.57   11.19
   0  27   2    7.73    7.57
   0  27   2   27.65   11.57
   0  27   3   -1.45    7.17
   0  27   3    3.31    7.56
   0  27   4   55.08   14.20
   0  27   4   59.86   13.87
   0  27   5   43.26   13.84
   0  27   5   47.90   12.05
   0  27   6    3.02    6.50
   0  27   6   15.91    8.83
   0  27   7   18.04    7.05
   0  27   7   23.40    9.64
   0  27   8   23.67    9.66
   0  27   8   31.36   10.73
   0  27   9   45.88   11.85
   0  27   9   36.91   11.75
   0  27  10   44.54   14.67
   0  27  10   12.69    8.92
   0  27  11    5.87    7.06
   0  27  11  -23.86   10.84
   0  27  12   36.32   11.28
   0  27  12   17.69   10.88
   0  27  13  136.18   18.97
   0  27  13  125.96   21.77
   0  27  14   22.79   11.03
   0  27  14   -0.84    9.42
   0  27  15   -2.51    8.77
   0  27  15   24.79   11.19
   0  27  16    7.99   11.82
   0  27  16   13.81    9.58
   0  27  17   23.60   12.40
   0  27  17   -6.35    6.83
   0  27  18   -3.22    9.01
   0  27  18    3.87    9.65
   0  27  19   10.46    9.09
   0  27  19   24.34   12.75
   0  27  20   25.93   11.83
   0  27  20   58.47   17.59
   0  27  21    2.86    7.83
   0  27  21   -6.63   10.12
   0  27  22   24.68   12.76
   0  27  23   18.10   15.16
   0  28  -3    5.85    7.84
   0  28  -2    8.90    8.09
   0  28  -1   45.60   12.65
   0  28   0   26.51   10.34
   0  28   1   50.81   13.78
   0  28   2   -3.19    9.86
   0  28   2    3.14    7.97
   0  28   3    3.65    7.35
   0  28   3    4.80    8.51
   0  28   4    8.48    8.31
   0  28   4   16.72   10.25
   0  28   5   37.49   10.35
   0  28   5   37.93   11.44
   0  28   6    2.35    7.57
   0  28   6   18.72    9.35
   0  28   7   89.24   16.03
   0  28   7  102.00   17.65
   0  28   8    6.09    7.46
   0  28   8    4.52    8.88
   0  28   9   63.15   14.74
   0  28   9   70.24   14.14
   0  28  10    9.96    8.58
   0  28  10   13.68   10.18
   0  28  11    4.27    9.34
   0  28  11   -0.42    7.28
   0  28  12   63.34   14.67
   0  28  12   86.93   18.03
   0  28  13  125.74   20.11
   0  28  13   74.30   14.32
   0  28  14   41.60   11.64
   0  28  14   44.54   13.96
   0  28  15   14.53    8.91
   0  28  15   28.15   11.97
   0  28  16    4.11    9.67
   0  28  16    0.98    9.81
   0  28  17   14.27   11.44
   0  28  17   -1.80    8.79
   0  28  18   11.05    9.66
   0  28  18    6.48   10.49
   0  28  19   15.54   10.22
   0  28  19   14.20   10.87
   0  28  20    2.33   10.75
   0  28  21   -5.59   10.96
   0  28  22   14.88   14.22
   0  29  -3   -0.91    6.25
   0  29  -2   48.01   13.30
   0  29  -1  108.20   18.59
   0  29   0   13.79    8.53
   0  29   1  121.92   19.30
   0  29   2   36.08   13.26
   0  29   2   46.26   12.01
   0  29   3    5.71    9.23
   0  29   3    0.12    7.01
   0  29   4   14.89    7.26
   0  29   4   21.76   10.96
   0  29   5    3.85    8.72
   0  29   5    3.77    8.86
   0  29   6    2.86    8.52
   0  29   6    1.96    8.23
   0  29   7   12.07    7.38
   0  29   7   -7.47    7.98
   0  29   8   -3.53    7.45
   0  29   8   -7.72    8.73
   0  29   9   12.47    9.92
   0  29   9   14.01    7.89
   0  29  10   32.48   11.29
   0  29  10   45.96   14.94
   0  29  11   23.52   12.71
   0  29  11   11.05    8.71
   0  29  12   62.32   16.78
   0  29  12   24.77    9.84
   0  29  13  124.79   22.29
   0  29  13  123.54   19.74
   0  29  14   72.58   18.13
   0  29  14  104.31   18.14
   0  29  15    6.45    8.56
   0  29  15   -3.73   10.84
   0  29  16   -2.33   10.54
   0  29  16   13.94   10.45
   0  29  17   12.27   11.68
   0  29  17   -1.73    9.99
   0  29  18   -1.76   10.17
   0  29  19    4.69   11.40
   0  29  20    6.58   10.76
   0  29  21   11.28   13.66
   0  30  -2   92.12   16.24
   0  30  -1   -0.08    7.66
   0  30   0   13.11    9.10
   0  30   1   13.41   10.41
   0  30   2  115.60   19.48
   0  30   3   25.29   10.89
   0  30   3    9.24    7.24
   0  30   4   34.45   12.82
   0  30   4   21.58   10.09
   0  30   5    1.62    8.20
   0  30   5   -2.85    7.51
   0  30   6    3.06    7.12
   0  30   6   -3.20    8.34
   0  30   7   26.99   12.92
   0  30   7   11.20    9.05
   0  30   8   -7.88    9.56
   0  30   8   -2.99    8.10
   0  30   9   65.99   16.13
   0  30   9   79.79   15.48
   0  30  10    2.00    8.72
   0  30  10    0.77    9.03
   0  30  11    8.02    8.14
   0  30  11   21.95   10.05
   0  30  12    3.60    9.00
   0  30  12    3.73    9.60
   0  30  13  -18.23   11.54
   0  30  13   12.33    8.44
   0  30  14    0.91    9.31
   0  30  14    1.83   11.70
   0  30  15   30.20   13.39
   0  30  15   -5.82   10.06
   0  30  16   -0.32    9.82
   0  30  17   29.26   14.56
   0  30  18   -0.89    9.32
   0  30  19   -0.20   10.47
   0  30  20   33.79   15.17
   0  31  -2   19.71    8.19
   0  31  -1   -4.36    8.51
   0  31   0    6.26    8.67
   0  31   1    5.58    8.70
   0  31   2   29.64   12.45
   0  31   3   40.71   13.74
   0  31   4   31.70   13.97
   0  31   4    2.88    8.48
   0  31   5   -1.39    9.22
   0  31   5    0.29   10.68
   0  31   6   13.37   10.95
   0  31   6   -0.50    8.63
   0  31   7   -7.66    8.35
   0  31   7    8.90    8.07
   0  31   8  -17.14   10.48
   0  31   8   -5.37    7.96
   0  31   9   65.95   16.19
   0  31   9   77.92   16.81
   0  31  10   28.90   11.11
   0  31  10   13.54    9.45
   0  31  11   -3.83    7.96
   0  31  11    3.47    8.62
   0  31  12   -7.57    9.34
   0  31  12    5.91    8.58
   0  31  13   27.23   13.04
   0  31  13    5.10    8.77
   0  31  14   37.09   14.79
   0  31  15   36.74   15.59
   0  31  16   26.13   13.64
   0  31  17  -20.55   12.95
   0  31  18    0.98   11.92
   0  32  -1    9.70    8.33
   0  32   0   12.60    7.92
   0  32   1    5.75    7.71
   0  32   2    0.03    8.25
   0  32   3   32.25   12.04
   0  32   4    3.15    8.65
   0  32   5   -1.17   10.15
   0  32   5   -2.58   10.24
   0  32   6   -2.13    8.50
   0  32   6   19.02   12.61
   0  32   7    7.94    9.72
   0  32   7  -10.79   10.21
   0  32   8    9.20   10.69
   0  32   8    2.07    9.35
   0  32   9   24.31   10.09
   0  32   9   11.29    9.75
   0  32  10    7.83   11.96
   0  32  10    3.92    9.67
   0  32  11    2.24    8.99
   0  32  11  -11.49    9.01
   0  32  12   20.38    9.65
   0  32  13    0.79    9.83
   0  32  14   28.96   13.91
   0  32  15   13.19   11.41
   0  33  -1   -3.02   10.22
   0  33   0  -19.68    9.37
   0  33   1   -3.08    8.25
   0  33   2    5.79    9.78
   0  33   3   26.32   12.17
   0  33   4    1.20    8.18
   0  33   5    9.73   10.50
   0  33   6    0.02    9.35
   0  33   6    2.87   11.90
   0  33   7   36.52   14.23
   0  33   7   24.39   13.07
   0  33   8   -5.74    8.74
   0  33   8    3.09   11.14
   0  33   9   16.17   11.39
   0  33  10    2.30    9.30
   0  33  11    8.77   10.75
   0  33  12   31.20   13.70
   0  33  13   -0.43    9.33
   0  34   0    7.67   10.80
   0  34   1   58.15   15.10
   0  34   2   29.13   12.14
   0  34   3   -0.06    8.67
   0  34   4   23.14   12.04
   0  34   5    7.84   10.39
   0  34   6   20.34   12.31
   0  34   7   -2.78   10.25
   0  34   8    6.93    9.07
   0  34   9  -19.01   11.97
  -1   0 -20  -10.65   10.20
  -1   0 -19   75.23   15.18
  -1   0 -18    7.56    7.65
  -1   0 -17  219.84   21.09
  -1   0 -16    2.46    7.53
  -1   0 -15   12.12    6.69
   1   0 -15    5.32    8.20
  -1   0 -14    0.57    6.00
   1   0 -14    5.14   11.28
   1   0 -13  379.06   28.97
  -1   0 -13  257.69   18.63
  -1   0 -12    7.48    5.59
   1   0 -12   15.66    8.08
  -1   0 -11    4.15    5.30
   1   0 -11   13.32    7.44
  -1   0 -10    2.37    4.69
   1   0 -10    9.02    7.74
  -1   0  -9  453.76   18.20
   1   0  -9  317.66   22.44
   1   0  -8    9.09    7.53
  -1   0  -8    1.81    3.31
   1   0  -7  646.12   29.95
  -1   0  -7  644.42   17.76
  -1   0  -6   -0.66    2.29
   1   0  -6    3.35    6.02
   1   0  -5 9999.00   99.21
  -1   0  -5 9555.12   44.79
   1   0  -4   46.36    9.12
   1   0  -3  148.57   11.79
   1   0  -2   89.36    8.80
   1   0  -1  365.78   14.54
  -1   0   0    1.85    1.89
  -1   0   1    1.78    1.81
  -1   0   2   27.29    6.15
  -1   0   3  150.20   11.39
  -1   0   4   32.96    8.81
   1   0   5 9658.73   35.15
  -1   0   5 8926.87   89.23
   1   0   6    4.47    1.80
  -1   0   6   -7.05    5.69
   1   0   7  667.03   13.12
  -1   0   7  756.27   29.62
  -1   0   8    7.40    5.37
   1   0   8    2.19    1.90
  -1   0   9  368.02   22.51
   1   0   9  514.26   13.82
  -1   0  10    5.79    6.90
   1   0  10    3.59    2.51
   1   0  11   10.78    3.25
  -1   0  11   17.35    8.61
  -1   0  12   10.24    7.61
   1   0  12    9.45    3.76
   1   0  13  264.89   13.63
  -1   0  13  353.65   24.45
   1   0  14   -0.05    3.22
  -1   0  14    2.75    7.15
   1   0  15   11.76    3.76
  -1   0  15    8.18    6.39
  -1   0  16   13.42    7.81
   1   0  16    5.17    3.72
  -1   0  17  242.91   22.67
   1   0  17  271.63   15.99
   1   0  18    2.62    3.54
  -1   0  18    2.37    8.00
   1   0  19   86.12   10.49
  -1   0  19   69.48   15.52
  -1   0  20   -3.54    8.57
   1   0  20   -1.36    4.24
  -1   0  21   85.21   14.79
   1   0  21   77.25   10.43
  -1   0  22    6.46    8.15
   1   0  22    6.69    5.97
   1   0  23   39.70    8.51
  -1   0  23   22.69    8.53
  -1   0  24    4.57    7.53
   1   0  24    6.57    5.25
  -1   0  25    9.43    9.64
   1   0  25    9.26    5.25
  -1   0  26   16.93   11.06
  -1   0  27   52.82   13.51
  -1   0  28   17.53   11.12
  -1   0  29   10.92   11.37
   1   0  29    7.62   11.28
   1   0  30   -3.72   10.76
  -1   0  30    7.55   11.67
  -1   0  31   -3.76   12.66
   1   0  31   24.67   16.90
   1   0  32   -3.39   11.37
  -1   0  32    5.41   13.53
  -1   0  33    7.38   14.06
   1   0  33   25.77   17.64
  -1   0  34    1.87   16.00
  -1   0  35   -2.77   13.56
  -1   1 -20    5.17    8.85
  -1  -1 -20   14.31   11.75
  -1   1 -19  114.69   16.80
  -1  -1 -19  115.27   17.69
  -1   1 -18   12.89    9.62
  -1  -1 -18   10.96    7.40
  -1  -1 -17   57.75   11.83
  -1   1 -17   56.38   12.71
  -1   1 -16  185.78   18.86
  -1  -1 -16  159.67   17.21
   1   1 -15  852.19   47.32
  -1   1 -15  970.69   39.36
  -1  -1 -15  929.37   39.21
  -1  -1 -14    9.73    5.99
   1  -1 -14   17.19   12.52
   1   1 -14   12.23   10.66
  -1   1 -14   10.01    6.84
  -1   1 -13  526.42   25.75
   1  -1 -13  642.37   37.66
  -1  -1 -13  570.86   27.13
   1   1 -13  650.96   37.62
  -1   1 -12  127.50   12.38
   1   1 -12  134.28   17.48
   1  -1 -12  122.83   16.40
  -1  -1 -12  132.94   13.42
  -1   1 -11   44.21    7.52
  -1  -1 -11   47.51    7.81
   1  -1 -11   56.29   11.99
   1   1 -11   53.10   11.26
   1  -1 -10   76.38   12.13
  -1  -1 -10   90.45    9.57
  -1   1 -10   73.17    8.90
   1   1 -10   84.93   14.25
   1   1  -9   96.30   12.63
  -1   1  -9   72.73    7.79
  -1  -1  -9   65.13    7.83
   1  -1  -9   67.17   11.52
   1  -1  -8 1877.98   50.14
   1   1  -8 1890.41   52.72
  -1  -1  -8 1835.57   34.29
   1   1  -7   10.86    7.20
  -1  -1  -7   17.43    3.84
   1  -1  -7   15.13    6.29
  -1   1  -7   13.00    3.53
  -1  -1  -6  235.16    9.28
   1   1  -6  247.31   17.68
   1  -1  -6  221.33   16.26
   1   1  -5  474.50   22.89
  -1  -1  -5  472.97   10.83
  -1  -1  -4  269.76    7.23
   1  -1  -4  308.90   19.91
   1   1  -3   17.05    6.53
  -1  -1  -3   17.66    1.89
   1  -1  -3   10.25    5.68
  -1  -1  -2  498.36    9.12
   1  -1  -2  837.90   22.13
   1  -1  -1 1237.67   20.38
   1  -1  -1 1189.54   24.01
   1  -1   0   16.63    4.26
   1  -1   0   10.87    2.45
  -1   1   0    0.13    1.27
  -1   1   0    0.65    1.02
  -1   1   1   -0.45    1.28
  -1   1   1   -5.29    2.76
  -1  -1   2  631.98   21.17
  -1   1   2  454.88   16.25
   1   1   3   19.71    2.13
  -1   1   3   10.89    4.48
  -1  -1   3   21.06    5.91
   1  -1   3   14.33    2.02
  -1   1   4  311.99   18.52
   1   1   4  291.39    7.01
  -1  -1   5  403.14   20.68
   1   1   5  437.85    8.76
  -1   1   5  455.57   20.80
  -1   1   6  252.62   16.19
  -1  -1   6  241.25   17.85
   1   1   6  225.73    7.40
   1   1   7   18.51    2.80
  -1  -1   7    7.64    5.58
   1  -1   7   17.45    2.43
  -1   1   7    4.03    5.48
   1   1   8 2000.24   26.98
  -1   1   8 1932.97   46.62
   1  -1   8 2017.32   25.89
   1  -1   9   70.55    5.73
  -1   1   9   82.11   11.62
  -1  -1   9   81.24   11.71
   1   1   9   68.41    5.58
   1   1  10  106.01    7.28
  -1  -1  10   77.84   12.64
  -1   1  10   62.75   10.36
   1  -1  10  114.22    7.80
  -1  -1  11   47.98   11.97
   1  -1  11   48.76    6.01
  -1   1  11   46.51    9.54
   1   1  11   46.24    5.53
   1   1  12  115.60    8.86
  -1  -1  12  137.60   15.42
   1  -1  12  117.61    9.15
   1  -1  13  584.99   20.75
   1   1  13  545.50   19.49
   1  -1  14   13.92    4.82
  -1  -1  14   11.93    8.34
   1   1  14    9.78    4.43
  -1   1  14    5.34    5.82
  -1   1  15  983.32   41.10
  -1  -1  15  889.13   41.14
   1   1  15  998.19   28.68
   1  -1  16  241.52   14.78
  -1   1  16  194.86   20.12
  -1  -1  16  207.13   22.06
   1   1  16  212.44   14.04
  -1  -1  17   84.94   14.59
  -1   1  17   72.71   13.22
   1  -1  17   65.58    8.36
   1   1  17   74.55    8.96
  -1   1  18   -1.30    7.56
   1  -1  18    0.05    3.97
  -1  -1  18   19.80    9.03
   1   1  18   11.85    5.80
   1   1  19  184.27   14.19
   1  -1  19  175.10   13.76
  -1  -1  19  143.38   18.57
   1   1  20   13.92    5.68
  -1  -1  20   15.70   11.27
   1  -1  20   14.14    5.75
  -1   1  20   24.14   10.92
   1  -1  21   75.93   10.74
  -1  -1  21  125.82   18.74
  -1   1  21  117.25   16.61
   1   1  21   69.88    9.90
  -1  -1  22  413.47   32.02
   1  -1  22  545.51   25.77
  -1   1  22  420.20   31.72
   1   1  22  494.18   24.61
   1  -1  23   24.54    7.39
  -1   1  23   22.62   10.00
   1   1  23   26.06    6.81
  -1  -1  23   32.80   11.33
  -1  -1  24   82.98   16.87
   1  -1  24   64.18    9.91
  -1   1  24   65.27   14.57
   1   1  24   61.71    9.79
   1  -1  25    5.92    5.60
  -1  -1  25   -6.32    9.89
   1   1  25    0.45    5.00
  -1   1  25    5.64   10.34
   1   1  26   10.92   10.28
   1   1  26   10.17    7.23
  -1   1  26   -4.84    8.83
  -1  -1  26   11.25    9.35
  -1  -1  27   36.10   13.17
  -1   1  27   22.80   10.14
   1   1  27   36.33   12.43
  -1   1  27   29.21   13.63
   1   1  28   -0.76    9.29
  -1  -1  28    8.95    9.88
  -1   1  28    4.26   10.16
  -1   1  28    5.24    9.50
   1   1  29   15.36   15.06
  -1   1  29    6.05   12.01
  -1   1  29   24.24   11.04
  -1   1  30   27.85   15.64
   1   1  30   41.67   15.79
   1   1  31   36.72   18.28
  -1   1  31   13.32   11.80
  -1  -1  31   19.57   14.11
  -1   1  32   -2.05   11.79
   1   1  32  -11.41   13.74
   1  -1  32   22.22   15.61
  -1  -1  32   13.26   14.06
  -1  -1  33    8.61   15.34
  -1   1  33    5.70   12.32
   1  -1  33   18.03   16.42
  -1   1  34   36.70   20.36
  -1  -1  34   16.29   14.08
  -1  -1  35    4.01   13.03
  -1   1  35   -7.32   13.93
  -1   2 -21   42.92   14.08
  -1   2 -20   -1.54    8.55
  -1   2 -19  142.76   19.27
  -1  -2 -19  113.28   17.92
  -1   2 -18   84.49   14.95
  -1  -2 -18   74.21   14.27
  -1   2 -17   12.51    8.08
  -1  -2 -17    0.50    6.75
  -1   2 -16   25.85    9.16
   1   2 -16   25.40   11.96
  -1  -2 -16   23.08    9.06
   1   2 -15    3.39    9.27
  -1  -2 -15    5.09    5.66
  -1   2 -15   15.42    8.11
   1   2 -14  320.83   29.40
  -1  -2 -14  381.70   24.72
   1  -2 -14  335.63   28.51
  -1   2 -14  400.47   23.45
  -1   2 -13   39.08    8.57
   1   2 -13   20.41   11.11
  -1  -2 -13   47.23    9.22
   1  -2 -13   28.39    8.92
  -1   2 -12   78.36    9.59
   1   2 -12   78.44   14.78
   1  -2 -12   61.71   12.39
  -1  -2 -12   69.00   10.37
   1   2 -11  255.23   23.56
  -1   2 -11  227.68   15.08
  -1  -2 -11  254.04   16.72
   1  -2 -11  225.71   21.26
   1   2 -10   14.55    8.34
  -1   2 -10   19.81    5.76
  -1  -2 -10   30.36    6.79
   1  -2 -10    8.10    8.14
  -1  -2  -9  306.67   15.20
  -1   2  -9  280.88   14.23
   1  -2  -9  323.67   22.77
   1  -2  -8  289.62   20.12
  -1  -2  -8  292.13   13.61
  -1   2  -8  323.28   13.79
   1   2  -8  335.38   22.61
  -1  -2  -7 3334.32   40.90
   1   2  -7 3517.37   70.65
  -1  -2  -6  124.25    6.82
   1  -2  -6  112.14   11.52
   1   2  -6  136.31   14.96
   1  -2  -5  293.69   18.46
  -1  -2  -5  215.60    9.45
  -1  -2  -4  575.91   11.60
   1  -2  -4  598.46   22.64
  -1   2  -3    7.66    2.19
   1  -2  -3   12.67    3.91
   1  -2  -3    7.38    4.52
  -1  -2  -3    5.51    1.80
   1  -2  -2   28.49    5.33
  -1  -2  -2   36.39    3.06
   1  -2  -2   40.54    5.43
  -1   2  -2   33.37    3.21
   1  -2  -1  288.48   11.77
   1  -2  -1  272.91   10.98
   1  -2   0 1184.56   20.79
   1  -2   0 1220.07   21.58
   1  -2   1  280.08    9.49
   1  -2   1  274.70    8.89
  -1   2   2   44.21    5.79
  -1   2   2   41.71    6.00
   1   2   2   30.70    3.10
   1  -2   2   30.91    3.05
  -1   2   3   11.34    4.76
   1  -2   3    8.68    2.03
   1   2   3    7.72    2.01
  -1   2   3   16.18    4.88
   1   2   4  555.91   13.24
  -1   2   4  548.41   20.88
  -1   2   4  497.85   19.14
  -1  -2   4  532.47   23.70
  -1   2   5  181.31   13.42
   1   2   5  166.04    9.64
  -1  -2   5  240.26   18.36
  -1   2   5  214.86   18.31
   1   2   5  254.81    8.94
   1   2   6  126.33    8.12
  -1  -2   6  125.65   13.21
   1   2   6  118.82    5.93
  -1   2   6  109.98   11.10
   1   2   7 3476.62   33.94
  -1   2   7 3611.82   61.38
   1   2   8  276.33   10.60
  -1   2   8  288.41   18.72
   1  -2   8  296.35   10.86
   1   2   9  279.08   11.47
   1  -2   9  300.16   11.57
   1  -2  10   33.87    4.76
   1   2  10   30.26    4.63
  -1   2  10   25.89    7.52
  -1  -2  10   16.29    8.75
   1  -2  11  250.44   12.03
  -1  -2  11  267.75   21.53
  -1   2  11  265.18   19.32
   1   2  11  249.59   12.44
  -1   2  12   92.31   12.07
   1   2  12   72.84    7.32
   1  -2  12   77.47    7.40
  -1  -2  12   77.13   12.50
  -1   2  13   30.28    9.00
  -1  -2  13   24.10   10.08
   1   2  13   61.06    7.10
   1  -2  13   51.94    6.90
   1  -2  14  397.30   17.94
  -1   2  14  256.62   21.79
   1   2  14  438.71   18.47
  -1  -2  14  308.39   25.00
  -1   2  15   18.42    7.80
   1   2  15    8.73    3.80
   1  -2  15    8.75    4.31
  -1   2  16   36.45    9.69
   1  -2  16   32.96    6.37
  -1  -2  16   26.70   10.37
   1   2  16   27.80    6.04
  -1  -2  17   13.13    8.46
  -1   2  17   21.93    8.83
   1  -2  17    1.26    3.69
   1   2  17    5.75    4.58
  -1  -2  18   72.02   14.70
   1   2  18   92.00   10.44
  -1   2  18   68.06   13.76
   1  -2  18   98.57   10.73
   1  -2  19  156.99   13.03
  -1  -2  19  153.34   20.36
   1   2  19  135.44   12.46
  -1   2  19  131.64   17.09
  -1   2  20    4.17    6.61
   1  -2  20    4.39    3.97
   1   2  20   13.46    6.06
  -1  -2  20   14.65   10.75
   1   2  21   77.18    9.99
   1  -2  21   58.75    8.27
  -1   2  21   51.22   11.90
  -1  -2  21   61.76   16.64
   1  -2  22  144.54   13.23
   1   2  22  135.25   13.71
  -1   2  22  205.39   22.69
  -1  -2  22  218.26   26.82
  -1   2  23   51.06   13.91
   1   2  23   53.42    9.06
   1   2  23   67.17   15.00
   1  -2  23   45.06    8.65
  -1  -2  23   71.71   16.60
   1   2  24   26.84   11.16
  -1   2  24    5.61    8.66
   1   2  24   43.32    8.39
  -1  -2  24   37.70   14.12
  -1   2  24   27.79   10.92
   1  -2  24   46.56    8.45
  -1  -2  25   16.64   10.53
   1   2  25   22.43   11.67
   1  -2  25   13.46    5.76
  -1   2  25   29.40   11.52
  -1   2  25   32.50   13.84
   1   2  25   16.17    6.57
   1   2  26   10.46    6.08
   1   2  26   16.78   11.16
  -1  -2  26   10.06    8.17
  -1   2  26   33.51   11.24
  -1   2  26   18.76   12.15
  -1  -2  27   69.79   15.80
  -1   2  27   42.74   15.75
  -1   2  27   70.18   14.28
   1   2  27   70.95   16.39
  -1   2  28  113.50   17.74
  -1  -2  28   87.04   17.99
  -1   2  28   67.66   19.06
  -1   2  29   32.42   12.03
  -1   2  29   21.11   14.48
   1   2  29    6.19    9.19
   1   2  30   28.44   14.78
  -1   2  30   26.46   15.90
   1   2  31   11.34   12.26
  -1   2  31    1.09   11.90
   1   2  32   -0.24   11.51
  -1   2  32   -2.03   12.05
  -1  -2  33    1.51   12.77
  -1   2  33  -16.04   16.76
   1  -2  33   21.89   13.95
  -1   2  34   21.53   17.70
  -1  -2  34  -21.68   17.11
  -1  -2  35   32.69   18.51
  -1   2  35  -10.05   16.30
  -1  -3 -17   15.67    8.01
  -1  -3 -16   17.41    8.47
   1   3 -15   92.54   18.29
  -1  -3 -15   78.44   12.80
  -1  -3 -14   24.51    8.59
   1   3 -14   16.00    9.20
   1  -3 -13  138.79   18.68
   1   3 -13  110.89   17.01
  -1  -3 -13  129.61   14.91
  -1  -3 -12   64.23   10.21
   1  -3 -12   46.88   12.40
  -1  -3 -11  160.83   13.93
   1  -3 -11  191.83   19.03
   1  -3 -10   14.95    8.70
  -1  -3 -10   20.03    4.68
   1  -3  -9   18.94    8.07
  -1  -3  -9   18.92    5.22
   1  -3  -8  176.55   17.26
  -1  -3  -8  127.05   11.23
  -1  -3  -7   61.54    6.23
   1  -3  -7   48.27   10.10
  -1  -3  -6  103.06    6.70
   1  -3  -6  108.57   11.75
  -1  -3  -5   34.82    4.99
   1  -3  -5   39.23    8.06
  -1  -3  -5   36.54    4.31
   1  -3  -4 7550.58   78.62
   1  -3  -4 7311.94   73.33
  -1  -3  -3   40.37    4.40
   1  -3  -3   50.80    7.39
   1  -3  -3   56.26    8.10
  -1  -3  -3   50.29    4.62
  -1   3  -3   58.31    4.93
  -1  -3  -2   13.31    2.43
   1  -3  -2    6.43    2.97
  -1   3  -2   17.23    2.06
   1  -3  -2    7.06    3.85
  -1  -3  -2   12.58    2.72
  -1   3  -2   12.15    3.04
   1  -3  -1   24.00    4.28
  -1  -3  -1   50.02    4.09
   1  -3  -1   17.21    4.64
  -1   3  -1   41.21    4.54
  -1   3  -1   41.10    3.60
  -1  -3  -1   39.54    3.29
  -1   3   0    8.04    3.33
  -1   3   0   14.83    3.21
   1  -3   0    3.57    3.38
   1  -3   0   12.60    3.44
  -1  -3   0   11.11    2.24
  -1   3   1   29.98    4.70
   1  -3   1   45.55    4.71
   1   3   1   43.87    3.07
   1  -3   1   40.28    3.75
  -1   3   1   29.51    4.41
   1  -3   2   13.45    2.55
  -1   3   2    9.43    3.90
   1   3   2   16.77    2.95
  -1   3   2   13.16    3.99
   1   3   2   11.38    2.36
   1  -3   2   15.27    3.54
   1  -3   3   61.10    5.01
   1   3   3   64.48    4.60
   1   3   3   52.49    4.24
  -1   3   3   46.25    6.54
  -1   3   3   43.91    7.87
   1  -3   4 8160.03   52.69
  -1   3   4 8063.57   78.81
   1   3   4 7542.54   51.36
  -1   3   4 7475.17   74.52
   1   3   4 7592.78   45.43
  -1   3   5   41.09    8.16
   1   3   5   33.99    3.83
  -1   3   5   48.57    7.39
   1   3   5   28.08    4.62
  -1   3   6   82.45   10.44
   1   3   6  102.75    8.50
  -1   3   6   89.62   10.58
  -1  -3   6   92.84   11.41
   1   3   6   90.92    5.57
  -1   3   7   50.31   10.05
  -1   3   7   45.00    9.56
   1   3   7   53.04    7.07
   1   3   7   71.15    5.79
  -1  -3   7   55.16   10.91
   1   3   8  145.84    9.05
  -1   3   8  122.90   15.99
  -1  -3   8  131.96   16.33
   1  -3   8   87.09    7.21
   1   3   8  104.86   11.01
  -1   3   8   93.03   14.19
   1   3   9    7.00    3.35
  -1   3   9    4.45    5.11
   1   3   9   14.00    5.81
  -1   3   9    6.66    6.15
  -1  -3   9   20.83    8.77
   1  -3   9    7.27    2.71
   1  -3  10   20.53    4.55
  -1   3  10   24.22    8.40
   1   3  10   16.54    5.64
   1   3  10   17.37    4.22
  -1   3  10   20.95    8.73
  -1  -3  10   15.12    7.94
  -1  -3  11  218.74   20.59
  -1   3  11  216.97   17.93
   1   3  11  138.16    9.47
   1   3  11  165.19   13.76
   1  -3  11  152.86   10.37
   1  -3  12   72.13    7.68
  -1  -3  12   45.64   11.07
   1   3  12   78.29   10.34
  -1   3  12   32.40    8.83
   1   3  12   79.08    7.69
   1  -3  13  128.13   10.90
  -1   3  13  129.68   14.67
  -1  -3  13  149.27   18.53
   1   3  13  127.18   13.48
   1   3  13  122.23    9.81
   1  -3  14   21.75    6.05
  -1   3  14   15.34    7.46
  -1  -3  14   20.77   10.40
   1   3  14   15.29    4.83
   1  -3  15   90.82    9.80
  -1   3  15   99.91   14.30
   1   3  15   90.68    9.58
  -1  -3  15   77.36   14.57
   1   3  16   27.23    5.73
   1   3  16   14.38    7.47
  -1  -3  16   16.11    7.75
  -1   3  16   20.28    7.64
   1  -3  16   20.65    5.36
  -1   3  17   21.32    7.62
  -1  -3  17   27.22   10.97
   1   3  17   21.46    7.15
   1   3  17   20.93    4.92
   1  -3  17   27.80    6.85
  -1   3  18   42.74   12.47
   1   3  18   38.34    9.87
  -1   3  18   42.52   10.89
   1   3  18   43.60    7.72
  -1  -3  18   36.81   10.28
   1  -3  18   44.71    8.24
   1   3  19   41.87    7.40
  -1   3  19   50.86   10.92
  -1  -3  19   57.01   13.49
   1  -3  19   45.66    8.08
   1   3  19   42.49   11.16
  -1   3  19   55.54   13.41
  -1   3  20   62.63   13.94
   1  -3  20   39.62    7.77
  -1   3  20   68.64   13.72
  -1  -3  20   41.43   14.37
   1   3  20   35.94    7.35
   1   3  20   28.53    9.71
  -1   3  21   27.91   10.04
   1   3  21   15.96    7.26
  -1  -3  21   31.11   10.26
   1  -3  21   21.20    6.37
   1   3  21   13.25    5.88
  -1   3  21   13.64    8.24
  -1  -3  22   18.76   11.54
  -1   3  22   -8.44    7.91
  -1   3  22    9.63    8.14
   1  -3  22   10.16    5.24
   1   3  22   -5.22    6.06
   1   3  22   10.33    7.89
   1   3  23   45.94   13.66
   1  -3  23   71.13    9.77
  -1   3  23   32.88   11.83
  -1   3  23   45.68   12.57
  -1  -3  23   24.49   11.70
   1   3  23   61.16    9.70
  -1   3  24   -2.19    8.45
  -1  -3  24   23.75   11.09
   1   3  24    6.17    5.46
  -1   3  24   18.93   10.51
   1   3  24    8.30   11.44
   1  -3  24   12.16    5.94
  -1   3  25   -1.41    8.54
   1   3  25   47.23   15.30
   1   3  25   30.14    7.51
  -1  -3  25    9.01    8.83
  -1   3  25   14.62    8.74
  -1  -3  26   55.73   14.42
  -1   3  26   50.35   12.61
   1   3  26   67.99   10.43
   1   3  26   60.36   16.09
  -1   3  26   37.81   16.35
  -1   3  27   30.84   11.11
   1   3  27    4.37    8.64
  -1   3  27   23.12   14.16
  -1  -3  27   -3.68    8.83
  -1   3  28    5.75   10.66
  -1   3  28   16.45    9.13
   1   3  28   10.78   12.84
  -1   3  29   34.70   13.89
  -1   3  29   52.32   13.87
   1   3  30   16.38   12.79
  -1   3  30    8.58   15.40
  -1   3  31   17.22   13.76
   1   3  31  -10.95   14.39
  -1   3  32  -22.70   16.08
   1   3  32   -7.01   13.05
  -1   3  33    6.13   12.93
  -1   3  34   29.01   20.04
  -1  -3  34   41.43   17.65
  -1  -3  35   10.83   13.99
  -1   3  35   -2.28   14.44
  -1  -4 -16   16.84    7.81
  -1  -4 -15   57.16   11.32
  -1  -4 -14   84.06   12.82
  -1  -4 -13  153.26   15.41
  -1  -4 -12  153.49   14.99
   1  -4 -12  120.83   16.60
   1  -4 -11   49.08   12.26
  -1  -4 -11   67.21    9.69
   1  -4 -10   94.71   14.48
  -1  -4 -10  125.85   11.26
  -1  -4  -9   84.94    8.77
   1  -4  -9  122.23   15.05
   1  -4  -8   45.69   10.04
  -1  -4  -8   51.30    6.58
   1  -4  -7 1460.88   43.06
  -1  -4  -7 1646.90   30.41
   1  -4  -6    8.48    5.72
  -1  -4  -6    6.43    3.75
  -1  -4  -6    8.71    3.15
   1  -4  -6    7.41    4.84
   1  -4  -5  207.40   15.20
  -1  -4  -5  174.27   10.56
   1  -4  -5  237.18   14.90
  -1  -4  -5  147.54    7.82
  -1   4  -4 1769.55   25.98
  -1  -4  -4 1849.85   25.65
  -1  -4  -4 1811.72   29.48
  -1   4  -4 1845.43   17.28
  -1  -4  -3  277.39   11.47
   1  -4  -3  329.75   17.89
   1  -4  -3  358.29   16.68
  -1   4  -3  261.75    6.64
  -1   4  -3  288.21   11.18
  -1  -4  -3  266.99    9.54
   1  -4  -2 1907.86   34.10
  -1   4  -2 1970.34   28.08
  -1   4  -2 1989.93   19.47
  -1  -4  -2 2032.07   27.25
  -1  -4  -2 1895.88   24.15
   1  -4  -1  282.50   14.09
  -1  -4  -1  291.66   10.10
  -1   4  -1  288.88    9.03
  -1   4  -1  256.86   10.95
  -1  -4  -1  248.39    9.19
   1  -4  -1  299.65   12.55
   1   4   0   89.83    5.24
   1  -4   0   97.46    7.06
  -1  -4   0   86.22    6.26
  -1  -4   0   84.13    5.74
   1  -4   0   90.83    7.52
  -1   4   0   96.02    7.95
  -1   4   0  100.19    6.21
   1  -4   1  304.71   10.27
   1  -4   1  255.82   12.32
   1   4   1  261.16    9.88
   1   4   1  267.47    8.79
  -1   4   1  288.10   11.45
  -1   4   1  229.90   12.72
  -1  -4   1  284.04    9.63
   1   4   2 1905.81   25.52
  -1   4   2 1944.86   36.91
   1  -4   2 1989.99   29.37
  -1   4   2 2058.31   32.84
   1  -4   2 1841.34   21.13
   1   4   2 1901.74   24.04
   1   4   3  306.34   11.98
  -1   4   3  330.70   15.73
   1  -4   3  273.56    7.63
   1   4   3  263.85    9.55
   1  -4   3  258.03   11.37
   1  -4   4 1838.44   16.02
   1  -4   4 1920.48   28.55
   1   4   4 1779.10   24.52
   1   4   4 1903.26   28.88
  -1   4   4 1776.40   37.55
   1   4   5  139.22    7.46
   1  -4   5  151.09    8.77
   1   4   5  144.33    9.12
  -1   4   5  245.40   15.13
  -1   4   5  221.53   13.19
   1  -4   5  124.79    4.14
   1   4   6    8.22    2.41
  -1   4   6    9.36    4.68
   1  -4   6    7.17    1.46
   1   4   6    0.23    3.22
  -1   4   6    6.59    4.98
   1  -4   6    2.38    2.52
   1  -4   7 1464.99   27.24
   1   4   7 1671.02   26.61
  -1   4   7 1536.94   42.29
  -1  -4   7 1593.83   45.87
  -1   4   7 1680.65   39.71
   1   4   7 1587.27   32.93
  -1   4   8   58.74    9.80
   1  -4   8   43.56    5.51
   1   4   8   50.47    5.27
   1   4   8   45.61    7.12
  -1   4   8   52.51    8.59
  -1  -4   8   40.31   10.44
  -1  -4   9  103.70   13.72
   1   4   9   69.89    9.52
  -1   4   9   92.85   12.32
   1   4   9   73.84    6.83
   1  -4   9   77.72    7.47
   1   4  10  142.55    9.17
  -1   4  10   91.57   13.30
   1  -4  10  128.59    9.24
  -1  -4  10   91.86   15.00
  -1   4  10  110.80   12.57
   1   4  10  130.36   12.14
   1  -4  11   66.35    7.96
  -1   4  11   52.75   10.19
   1   4  11   54.67    9.38
   1   4  11   63.38    6.60
  -1  -4  11   53.83   12.09
  -1   4  11   56.25    9.68
   1   4  12  144.70   14.54
   1  -4  12  164.62   11.58
  -1   4  12  140.87   16.66
  -1  -4  12  126.01   17.54
   1   4  12  152.26   10.50
  -1   4  12  121.34   13.50
  -1   4  13   95.03   12.33
   1  -4  13  166.12   12.41
   1   4  13  140.90   14.33
  -1  -4  13  114.53   16.43
  -1   4  13   87.55   14.12
   1   4  13  154.62   10.98
  -1   4  14   98.62   12.79
   1  -4  14   69.72    8.64
  -1  -4  14   90.96   16.07
   1   4  14   64.08   11.34
   1   4  14   76.37    8.29
  -1   4  14   85.28   14.82
  -1   4  15   67.55   13.55
   1  -4  15   79.41    9.81
  -1   4  15  105.07   13.93
   1   4  15   72.29    8.28
  -1  -4  15   82.27   15.69
   1   4  15   72.13   12.06
  -1  -4  16   29.01   11.06
  -1   4  16   23.68    9.19
   1   4  16   26.63    5.70
  -1   4  16   29.93    9.04
   1   4  16   33.55    8.99
   1  -4  16   25.05    6.16
   1  -4  17   11.74    5.49
  -1   4  17   24.96    9.92
  -1  -4  17   25.99   10.55
  -1   4  17   24.11    8.33
   1   4  17    3.57    6.61
   1   4  17   14.73    5.23
  -1   4  18   20.81   10.57
   1   4  18   12.13    4.68
   1   4  18   23.66    8.93
   1  -4  18   25.66    6.32
  -1  -4  18   14.05    8.28
  -1   4  18   24.63    8.86
  -1  -4  19   -2.12    7.83
  -1   4  19    8.44   10.56
  -1   4  19    2.52    5.88
   1   4  19   -5.73    3.82
   1  -4  19    5.48    5.12
   1   4  19   12.60    8.52
   1   4  20   31.51   11.18
   1   4  20    8.58    4.39
  -1   4  20    9.89    7.87
  -1  -4  20   25.33   11.91
   1  -4  20   10.83    5.20
  -1   4  20   -0.74    8.15
  -1  -4  21   16.75   12.92
   1   4  21   11.64    8.78
  -1   4  21   11.13    9.45
   1  -4  21   14.94    6.79
  -1   4  21    9.32    8.98
   1   4  21   15.47    5.43
  -1   4  22   87.79   17.65
  -1   4  22  121.12   17.09
  -1  -4  22  103.65   18.93
   1  -4  22  138.07   13.04
   1   4  22  106.62   17.25
   1   4  22  125.30   13.35
   1   4  23   53.23   14.36
   1   4  23   87.51   11.51
  -1   4  23   50.77   11.96
   1  -4  23   90.91   11.58
  -1   4  23   56.37   15.84
  -1  -4  23   53.47   15.10
   1  -4  24   30.34    7.62
   1   4  24   27.41   12.49
   1   4  24   24.94    7.53
  -1  -4  24   50.44   16.11
  -1   4  24   22.63    8.97
  -1   4  24   23.44   11.85
  -1   4  25   26.28    9.90
  -1   4  25   35.43   16.56
  -1  -4  25   38.05   13.83
   1   4  25   35.98   14.64
   1   4  25   32.31    8.79
   1   4  26   21.36    7.11
  -1   4  26   29.35   13.76
   1   4  26   20.40   11.92
  -1   4  26   24.59    9.11
  -1  -4  26   26.90   12.78
  -1   4  27   40.90   11.24
   1   4  27   49.53   16.23
  -1   4  27   32.30   12.58
  -1  -4  27   51.77   15.27
   1   4  27   70.67   11.15
   1   4  28   38.22   15.31
  -1   4  28   45.54   16.42
  -1   4  28   70.19   15.68
  -1   4  29    8.79   12.26
   1   4  29   21.42   12.64
  -1   4  29   42.39   12.51
   1   4  30   27.35   15.96
  -1   4  30   79.11   19.80
  -1   4  31   17.56   13.77
   1   4  31   36.43   15.74
  -1   4  32    2.76   12.03
   1   4  32    4.02   12.19
  -1   4  33   35.47   18.08
  -1   4  34    6.42   14.17
  -1   4  35  -12.55   15.85
  -1  -5 -15  105.50   14.66
  -1  -5 -14  140.89   15.47
  -1  -5 -13   65.84   12.68
  -1  -5 -12  174.76   15.48
   1  -5 -12  159.23   19.30
  -1  -5 -11   24.01    6.26
   1  -5 -11   31.74    9.32
  -1  -5 -10   93.81    9.88
   1  -5 -10   81.71   13.72
   1  -5  -9   99.04   14.42
  -1  -5  -9  129.16   11.13
   1  -5  -8  809.19   33.60
  -1  -5  -8  706.12   22.33
   1  -5  -7  961.42   33.47
   1  -5  -7  903.42   34.27
  -1  -5  -7  848.92   22.66
  -1  -5  -7  928.64   27.36
   1  -5  -6  926.39   33.22
   1  -5  -6  894.86   31.48
  -1  -5  -6  865.22   21.62
  -1  -5  -6  815.92   25.66
  -1  -5  -5   11.40    3.50
  -1  -5  -5    4.36    3.34
   1  -5  -5   -5.93    6.83
   1  -5  -5    1.23    4.89
  -1   5  -4   22.70    4.13
   1  -5  -4   29.09    6.34
  -1  -5  -4   30.28    5.38
   1  -5  -4   26.68    6.10
  -1   5  -4   29.79    2.98
  -1  -5  -4   33.08    4.20
  -1   5  -3   29.74    2.88
  -1  -5  -3   33.28    4.07
  -1   5  -3   36.42    5.24
  -1  -5  -3   31.66    5.28
   1  -5  -3   26.94    5.85
   1  -5  -3   24.76    6.21
  -1   5  -2 3195.21   38.87
   1  -5  -2 3083.20   44.07
  -1  -5  -2 3108.62   38.26
  -1   5  -2 3191.22   27.50
   1  -5  -1 2704.64   38.75
  -1  -5  -1 2820.69   34.08
  -1  -5  -1 3093.93   34.15
   1  -5  -1 2798.20   46.16
  -1   5  -1 2969.52   39.07
  -1   5  -1 3014.25   29.45
  -1  -5   0   33.00    5.60
  -1   5   0   62.08    6.21
   1   5   0   46.33    5.78
  -1   5   0   44.21    7.38
  -1  -5   0   35.44    6.16
   1  -5   0   37.78    7.07
   1  -5   0   49.66    6.93
   1   5   1 2680.57   33.84
   1   5   1 2892.33   31.86
  -1   5   1 2693.21   41.28
  -1   5   1 2547.51   33.78
  -1  -5   1 2649.70   33.63
   1  -5   1 2906.22   31.56
   1  -5   1 2952.91   40.90
  -1   5   2 3333.96   49.01
  -1  -5   2 3208.85   36.61
   1   5   2 3016.81   35.12
   1  -5   2 3039.12   40.14
  -1   5   2 3105.74   40.12
   1   5   2 3264.36   35.99
   1  -5   2 3109.74   30.49
   1   5   3   32.91    4.22
   1  -5   3   31.37    3.04
  -1   5   3   19.21    6.10
   1  -5   3   38.69    5.28
  -1   5   3   24.24    5.27
   1   5   3   28.86    4.09
   1   5   4   25.21    4.29
   1  -5   4   26.95    4.67
   1  -5   4   27.50    2.81
  -1   5   4   13.76    5.52
  -1   5   4   20.27    5.11
   1   5   4   36.07    4.21
  -1   5   5    6.03    4.17
   1   5   5    3.59    2.38
   1   5   5    0.69    3.36
   1  -5   5    5.51    3.18
   1  -5   5    5.74    1.57
  -1   5   5    7.19    5.71
   1   5   6  830.32   23.90
   1   5   6  755.62   18.81
   1  -5   6  807.00   12.22
   1  -5   6  815.88   21.77
  -1   5   6  908.64   28.21
  -1   5   6  853.83   30.32
   1  -5   7  769.49   12.98
   1   5   7  782.46   19.25
   1   5   7  823.89   24.68
   1  -5   7  813.95   21.95
  -1   5   8  861.96   29.15
   1  -5   8  661.36   21.18
  -1  -5   8  718.62   33.84
  -1   5   8  810.32   32.28
   1   5   8  695.04   24.49
   1   5   8  593.33   17.74
  -1   5   9  109.32   13.47
   1  -5   9  117.80    9.80
  -1  -5   9   89.35   13.98
   1   5   9  126.52   11.86
   1   5   9  129.88    8.88
  -1   5   9  103.90   11.66
   1   5  10   93.28    8.17
  -1   5  10   77.49   13.04
  -1   5  10   74.71   10.24
   1  -5  10   90.56    9.44
   1   5  10   70.25    9.39
  -1  -5  10   72.70   13.61
  -1   5  11   30.82    7.57
  -1   5  11   40.45   10.52
  -1  -5  11   40.49   11.41
   1   5  11   24.44    6.77
   1  -5  11   23.08    6.00
   1   5  11   31.46    4.72
  -1  -5  12  137.76   18.17
  -1   5  12  168.36   18.23
  -1   5  12  162.89   15.03
   1  -5  12  200.09   13.42
   1   5  12  228.33   12.87
   1   5  12  182.21   16.24
  -1   5  13   42.92    9.92
  -1   5  13   60.56   10.38
   1   5  13   60.64    9.80
  -1  -5  13   62.12   11.57
   1   5  13   70.28    7.83
   1  -5  13   59.62    8.19
   1   5  14  119.47   10.23
   1   5  14  153.18   16.21
  -1   5  14  157.73   18.82
  -1   5  14  172.24   16.26
  -1  -5  14  188.91   21.46
   1  -5  14  137.57   11.89
  -1   5  15   55.82   12.80
   1  -5  15  143.68   12.69
   1   5  15  116.29   14.79
   1   5  15  125.30   11.08
  -1   5  15   75.84   12.84
  -1  -5  15   93.84   16.77
   1   5  16  126.82   15.27
   1   5  16  132.40   11.59
  -1  -5  16  135.39   19.08
  -1   5  16   86.11   14.00
  -1   5  16  118.56   14.88
   1  -5  16  140.26   13.01
  -1   5  17  101.60   15.84
   1   5  17   84.97   13.77
  -1  -5  17  105.21   17.06
   1   5  17   65.26    8.80
  -1   5  17  111.49   14.55
   1  -5  17  101.09   11.77
   1  -5  18  108.47   12.22
   1   5  18   81.44   10.10
  -1   5  18   98.95   14.03
   1   5  18   83.84   14.98
  -1   5  18   88.19   15.31
  -1  -5  18   89.72   18.07
  -1  -5  19   66.54   15.31
   1   5  19   52.36    8.71
   1   5  19   42.11   12.31
  -1   5  19   46.07   10.65
  -1   5  19   21.19   10.67
   1  -5  19   51.84    8.66
  -1   5  20   57.66   12.76
  -1   5  20   38.69   13.10
   1   5  20   69.02   14.25
   1  -5  20   99.56   11.62
   1   5  20   92.65   10.93
  -1  -5  20   65.17   15.01
  -1   5  21  117.26   16.56
   1   5  21  183.52   21.83
   1  -5  21  239.58   17.27
  -1   5  21   93.88   17.98
  -1  -5  21  120.37   20.17
   1   5  21  203.18   16.55
   1   5  22   35.85    8.30
  -1   5  22   36.69   11.51
  -1   5  22   16.37    8.56
   1  -5  22   38.49    8.64
  -1  -5  22   28.91   12.63
   1   5  22   31.44   11.02
  -1   5  23  153.87   18.62
   1   5  23  229.07   18.38
  -1   5  23  109.82   20.89
   1   5  23  207.89   24.09
  -1  -5  23  197.65   25.22
   1  -5  23  242.98   16.96
  -1   5  24   34.11   11.15
  -1   5  24   21.23   12.36
  -1  -5  24   33.30   14.51
   1   5  24   27.44    9.92
   1   5  24   49.08    9.36
   1   5  25   15.71   12.25
  -1   5  25    0.64    7.89
  -1   5  25   18.35   13.27
   1   5  25    8.08    5.84
  -1  -5  25   12.80   11.26
  -1  -5  26   23.06   12.42
   1   5  26    6.32    6.79
   1   5  26   -4.14    8.41
  -1   5  26   -0.36    6.71
  -1   5  26   12.59   11.15
   1   5  27   49.66   10.54
  -1  -5  27   16.75   13.17
  -1   5  27   36.48   14.23
  -1   5  27   39.32   12.09
   1   5  27   44.85   15.12
   1   5  28   20.17   15.03
  -1   5  28   28.16   13.33
  -1   5  28   35.27   12.62
  -1   5  29   63.36   15.60
   1   5  29   22.55   13.30
  -1   5  29   40.27   16.65
  -1   5  30  -11.45   17.04
  -1   5  30   -1.52    8.10
   1   5  30   -5.92   12.38
   1   5  31   17.20   11.57
  -1   5  31   11.94   16.11
  -1   5  32    7.45   16.16
  -1   5  33    5.41   14.97
  -1   5  34   29.30   19.87
  -1   5  35  -15.89   18.65
  -1  -6 -14  190.83   19.26
  -1  -6 -13  129.70   14.87
  -1  -6 -12   89.73   11.76
  -1  -6 -11  144.23   13.28
   1  -6 -11  115.17   16.46
   1  -6 -10   89.41   13.50
  -1  -6 -10   70.58    9.65
   1  -6  -9  296.16   22.77
  -1  -6  -9  390.70   18.77
  -1  -6  -8  356.62   16.63
   1  -6  -8  399.71   24.02
   1  -6  -8  354.63   22.83
  -1  -6  -7   83.00    9.73
   1  -6  -7   73.20   10.55
   1  -6  -7   55.57    9.71
  -1  -6  -7   87.86    8.16
   1  -6  -6  733.14   30.72
   1  -6  -6  763.62   31.24
  -1  -6  -6  671.23   24.28
  -1  -6  -6  685.40   20.57
   1  -6  -5 5113.01   70.77
   1  -6  -5 5001.40   74.10
  -1  -6  -4    4.96    4.67
   1  -6  -4    6.21    4.77
   1  -6  -4    3.57    5.12
  -1   6  -4    5.65    3.58
  -1  -6  -4    5.50    3.29
  -1   6  -4    6.90    2.00
  -1   6  -3  133.10    6.35
  -1  -6  -3  175.21   10.69
  -1   6  -3  152.41    9.72
  -1  -6  -3  162.52    8.62
   1  -6  -3  195.24   14.72
   1  -6  -2   15.70    5.02
  -1  -6  -2   13.27    3.78
  -1   6  -2   12.69    2.87
  -1   6  -2   13.92    4.52
   1  -6  -2   16.78    6.38
  -1  -6  -2   11.78    3.61
  -1  -6  -1 1512.59   25.69
   1   6  -1 1493.64   24.89
  -1   6  -1 1501.61   22.57
   1  -6  -1 1603.33   29.83
  -1   6  -1 1540.48   31.19
  -1  -6  -1 1534.91   28.07
   1  -6   0  144.13    8.43
   1  -6   0  137.47   10.82
  -1   6   0  132.86   10.26
  -1  -6   0  123.27    7.89
  -1   6   0  137.69    7.77
   1   6   0  121.92    7.98
  -1  -6   0  145.15    8.85
  -1  -6   1 1506.99   27.81
   1  -6   1 1605.88   25.32
  -1  -6   1 1661.93   28.95
   1  -6   1 1545.69   32.47
   1   6   1 1450.92   26.70
  -1   6   1 1676.05   36.36
  -1   6   1 1547.55   27.26
   1   6   1 1461.44   25.51
  -1   6   2   20.57    4.40
   1  -6   2    8.79    2.99
   1   6   2    5.37    3.39
   1   6   2    6.40    2.97
  -1  -6   2   17.95    4.58
  -1   6   2   19.09    6.12
   1  -6   2    6.90    4.29
   1   6   3  142.01    8.41
  -1   6   3  233.42   12.16
  -1   6   3  247.57   15.93
  -1  -6   3  266.10   12.17
   1   6   3  164.62    9.72
   1  -6   3  149.21    6.86
   1  -6   3  172.12   10.66
   1  -6   4    2.60    3.28
  -1   6   4   -2.01    4.76
   1  -6   4   10.36    2.39
  -1   6   4    3.28    3.50
   1   6   4   10.43    5.29
   1   6   4    4.39    2.99
   1  -6   5 4977.90   34.17
   1   6   5 4883.22   47.92
  -1   6   5 5041.07   72.65
   1   6   5 4959.14   55.86
   1  -6   6  645.98   21.20
  -1   6   6  622.82   27.57
   1   6   6  685.94   18.86
   1  -6   6  639.74   12.59
   1   6   6  670.11   23.44
  -1   6   7   67.33    8.87
   1  -6   7   79.13    7.58
   1   6   7   78.46    6.76
   1  -6   7   84.26    4.67
   1   6   7   84.08    8.95
  -1   6   8  407.67   20.48
  -1   6   8  360.78   21.62
   1  -6   8  397.35   10.77
   1  -6   8  380.26   16.83
   1   6   8  350.03   18.17
   1   6   8  368.86   14.43
  -1   6   9  306.08   19.36
  -1  -6   9  308.14   24.40
  -1   6   9  272.60   20.54
   1   6   9  347.36   19.02
  -1   6  10  100.80   11.65
  -1   6  10   66.72   11.74
  -1  -6  10   80.04   15.31
   1  -6  10   67.83    9.15
   1   6  10   85.81    7.97
   1   6  10   80.65   10.16
  -1   6  11  125.40   15.79
   1  -6  11  129.86   11.65
  -1  -6  11  112.33   16.84
   1   6  11  132.83   13.36
  -1   6  11  114.73   12.91
   1   6  11  153.33   10.48
   1   6  12  102.92    9.31
   1   6  12   99.80   12.27
  -1   6  12   82.05   11.21
   1  -6  12  114.69   11.67
  -1   6  12   80.47   13.37
  -1  -6  12   94.35   16.08
   1  -6  13  124.89   12.68
   1   6  13  102.60   12.65
  -1   6  13  129.25   14.32
  -1  -6  13  133.36   17.71
   1   6  13  118.96   10.59
  -1   6  13  133.51   17.59
  -1   6  14  179.23   16.76
   1   6  14  200.44   18.07
  -1   6  14  172.56   19.68
   1   6  14  232.48   14.79
  -1  -6  14  218.68   23.02
   1  -6  14  225.79   15.89
   1  -6  15   16.39    6.62
  -1  -6  15   15.33    9.74
   1   6  15   24.53    8.04
  -1   6  15    3.59    8.12
   1   6  15   24.08    6.08
  -1   6  15    5.47    4.67
   1  -6  16    7.54    5.97
  -1   6  16    9.23    6.62
   1   6  16    4.94    3.79
   1   6  16    4.79    6.80
  -1   6  16    0.67    6.96
  -1  -6  16    8.76    9.43
  -1   6  17   66.77   14.56
   1  -6  17   70.74   10.84
  -1   6  17   46.90    9.68
   1   6  17   80.78   12.98
   1   6  17   63.82    9.04
  -1  -6  17   77.67   15.67
   1   6  18   11.88    5.17
   1  -6  18   17.36    6.38
  -1  -6  18   13.70    8.09
  -1   6  18   17.27   10.11
  -1   6  18    5.13    6.17
   1   6  18    5.61    7.30
   1   6  19   50.23    8.98
  -1  -6  19   58.85   16.27
   1   6  19   58.73   12.22
  -1   6  19   62.43   11.92
   1  -6  19   72.63   10.97
  -1   6  19   70.80   14.43
   1   6  20  155.69   14.15
  -1  -6  20  156.79   24.14
   1  -6  20  137.67   14.13
  -1   6  20   86.50   14.18
  -1   6  20   91.80   18.55
   1   6  20  119.90   17.63
  -1  -6  21    3.86   10.96
   1  -6  21   -1.37    5.72
  -1   6  21   10.26    7.53
   1   6  21    2.44    5.46
  -1   6  21   14.55   10.19
   1   6  21    9.93   10.22
   1  -6  22   99.02   12.07
  -1  -6  22  152.19   23.46
  -1   6  22  134.98   22.70
   1   6  22   85.61   11.84
   1   6  22   99.32   18.61
  -1   6  22  155.47   17.99
   1   6  23   39.65    8.67
  -1   6  23   49.42   16.48
  -1  -6  23   42.91   14.03
   1   6  23   55.89   15.22
   1  -6  23   31.56    8.18
  -1   6  23   29.00    9.03
  -1   6  24   60.81   17.41
  -1   6  24   57.37   13.65
   1   6  24   85.69   17.59
   1   6  24  120.71   14.19
  -1  -6  24   83.21   18.41
   1   6  25    7.64    8.93
  -1   6  25   20.11   12.99
   1   6  25   16.20    7.12
  -1  -6  25    7.02   10.18
  -1   6  25   11.13    9.00
  -1   6  26   29.96   11.20
  -1  -6  26   19.31   10.11
   1   6  26   35.20   13.96
   1   6  26   53.13   10.40
  -1   6  26   21.16   15.59
  -1   6  27   16.04   10.84
   1   6  27    1.95    5.48
  -1   6  27   24.15   14.37
   1   6  27   11.03   13.40
   1   6  28   19.29   14.60
  -1   6  28   25.23    9.86
  -1   6  28    3.35   11.18
   1   6  29   -1.50   11.27
  -1   6  29   -7.68   10.26
  -1   6  29   -1.00    7.90
  -1   6  30    5.84    9.48
   1   6  30   13.71    9.59
  -1   6  30    4.23   13.34
   1   6  31    7.13   12.20
  -1   6  31   -5.86   12.80
  -1   6  32    8.65   16.09
  -1   6  33   15.00   13.37
  -1   6  34    8.55   16.26
  -1  -7 -12  508.40   26.34
  -1  -7 -11   22.77    6.97
  -1  -7 -10  262.84   17.13
  -1  -7  -9   43.91    8.22
  -1  -7  -9   29.88    6.02
   1  -7  -9   30.25    9.37
   1  -7  -9   23.76    7.73
  -1  -7  -8   79.86   10.30
  -1  -7  -8   61.27    7.98
   1  -7  -8   90.63   12.32
   1  -7  -8   63.41   10.75
  -1  -7  -7  484.76   19.30
   1  -7  -7  698.93   30.12
  -1  -7  -7  506.41   23.54
   1  -7  -7  697.63   31.78
  -1  -7  -6  253.75   15.59
   1  -7  -6  248.19   18.50
   1  -7  -6  216.85   16.56
  -1  -7  -6  244.76   12.83
  -1  -7  -5   90.02   10.00
  -1  -7  -5   62.87    6.82
  -1   7  -5   80.49    7.47
   1  -7  -5   89.17   10.22
  -1  -7  -4  761.22   20.92
   1  -7  -4  917.27   29.20
  -1   7  -4  889.96   24.16
   1  -7  -4  777.16   30.66
  -1  -7  -4  827.73   26.70
  -1   7  -4  805.49   16.70
  -1   7  -3 2829.01   30.65
  -1   7  -3 2662.89   42.41
  -1  -7  -3 2716.28   37.69
  -1  -7  -3 2408.47   40.56
   1  -7  -3 2418.50   46.03
   1  -7  -3 2754.47   53.01
  -1   7  -2   81.24    5.92
  -1  -7  -2   91.92    7.81
   1  -7  -2   72.09    8.53
  -1   7  -2   79.16    8.73
   1  -7  -2   80.12   11.39
  -1  -7  -2   80.09    8.40
   1   7  -1   45.73    5.35
  -1  -7  -1   91.08    8.13
   1  -7  -1   57.87    8.57
  -1   7  -1   70.39    8.44
  -1  -7  -1  100.18    7.02
   1  -7  -1   40.39    6.00
  -1   7  -1   93.01    6.35
   1  -7   0   12.05    6.05
  -1   7   0   25.22    4.66
   1   7   0   13.96    4.85
  -1  -7   0   15.31    5.04
  -1  -7   0   20.44    4.66
  -1   7   0    8.06    5.69
   1  -7   0   22.97    5.13
   1   7   0   18.23    4.82
  -1   7   1   55.41    7.86
  -1  -7   1   60.82    6.83
   1  -7   1   97.58    9.68
   1   7   1   86.05    7.31
  -1   7   1   49.42    5.66
   1   7   1   76.58    7.12
   1  -7   1   91.12    7.05
  -1  -7   1   52.16    5.99
   1   7   2   87.23    7.97
  -1  -7   2   78.39    7.97
  -1   7   2   73.38    7.45
  -1   7   2   66.19    9.44
   1  -7   2   91.06    6.86
  -1  -7   2   81.05    7.94
   1  -7   2   68.24    8.18
   1   7   2   74.29    6.82
  -1  -7   3 2825.18   42.47
  -1   7   3 2606.30   50.25
   1   7   3 2606.08   37.51
   1  -7   3 2617.27   45.05
   1   7   3 2807.09   41.09
   1  -7   3 2787.10   32.37
  -1   7   3 2619.30   41.68
   1  -7   4  806.54   16.51
  -1  -7   4  972.53   25.18
   1   7   4  828.28   23.37
   1  -7   4  820.88   25.26
  -1   7   4  847.12   30.71
  -1   7   4  956.99   26.07
   1   7   4  845.29   21.11
  -1   7   5   87.89    8.73
   1   7   5   77.70    6.79
   1  -7   5   63.71    4.76
   1  -7   5   77.90    7.68
  -1   7   5  100.78   12.28
   1   7   5   87.35    8.72
  -1   7   6  239.03   14.54
   1  -7   6  228.23   13.27
   1  -7   6  259.69    8.72
   1   7   6  259.33   14.94
  -1   7   6  249.80   18.09
   1   7   6  246.06   11.81
  -1   7   7  700.00   25.24
   1   7   7  465.27   16.66
   1   7   7  543.95   22.42
  -1   7   7  631.53   28.33
   1  -7   7  490.00   11.90
   1  -7   7  496.72   20.70
   1   7   8   55.79    8.81
   1   7   8   47.45    6.29
   1  -7   8   52.07    4.49
  -1   7   8   77.23   11.43
   1  -7   8   60.38    8.03
  -1   7   9   24.90    6.53
   1   7   9   28.62    5.36
   1  -7   9   25.52    5.41
  -1   7   9   27.35    7.83
   1   7   9   30.09    7.38
   1  -7   9   25.04    3.68
  -1   7  10  234.85   16.98
  -1  -7  10  251.65   23.12
   1   7  10  248.43   13.72
  -1   7  10  237.28   19.62
   1   7  10  249.53   17.16
   1  -7  10  245.32   15.35
  -1  -7  11   39.34   10.57
  -1   7  11   27.01    7.16
   1   7  11   22.91    5.05
  -1   7  11   35.02    9.39
   1  -7  11   36.31    8.42
   1   7  11   26.96    7.89
  -1  -7  12  684.65   37.89
  -1   7  12  791.57   37.41
   1   7  12  538.18   20.90
  -1   7  12  739.58   30.83
   1  -7  12  674.40   28.53
   1   7  12  619.66   28.89
   1  -7  13  492.49   25.21
   1   7  13  410.22   24.33
  -1  -7  13  573.98   35.85
  -1   7  13  531.73   27.12
  -1   7  13  476.31   30.57
   1   7  13  421.08   19.12
   1   7  14  249.02   20.29
   1   7  14  241.83   15.04
  -1   7  14  273.39   24.76
  -1   7  14  246.36   19.22
   1  -7  14  261.35   18.26
  -1  -7  14  272.80   26.64
   1  -7  15  277.62   19.41
   1   7  15  226.57   19.51
   1   7  15  258.16   16.54
  -1  -7  15  177.69   22.23
  -1   7  15  153.60   15.89
  -1   7  15  189.36   21.03
  -1   7  16   46.41    8.72
   1   7  16   86.20   13.13
  -1  -7  16   87.36   18.77
   1   7  16   81.73    9.81
   1  -7  16   92.34   12.30
  -1   7  16   67.24   14.80
   1  -7  17   94.14   12.42
  -1   7  17   65.68   12.85
  -1  -7  17   83.65   16.67
  -1   7  17   98.83   13.86
   1   7  17   52.55    8.20
   1   7  17   72.09   12.85
  -1   7  18   90.49   16.16
   1  -7  18   88.33   12.01
   1   7  18   61.82    9.36
   1   7  18   55.12   12.69
  -1  -7  18   77.23   16.17
  -1   7  18  101.22   14.37
  -1   7  19  321.09   23.62
   1   7  19  185.29   20.49
   1   7  19  198.63   16.08
  -1   7  19  307.26   29.58
  -1  -7  19  323.80   31.52
   1  -7  19  260.96   19.58
   1   7  20   67.25   12.83
   1  -7  20   88.86   12.57
  -1   7  20   94.50   14.03
  -1   7  20  105.93   19.51
   1   7  20   77.42   10.94
  -1  -7  20  105.62   19.64
   1   7  21   32.33    8.21
   1  -7  21   28.41    7.96
  -1   7  21   26.16    9.48
  -1   7  21   15.74   10.49
  -1  -7  21   37.78   12.89
   1   7  21   18.54    9.75
  -1  -7  22   57.86   17.29
  -1   7  22   56.77   16.34
   1   7  22   31.88   11.58
   1  -7  22   50.76    9.35
  -1   7  22   42.55   11.18
   1   7  22   40.46    8.26
  -1   7  23   15.53   11.03
   1   7  23   28.12    8.21
  -1   7  23   13.15    7.33
   1  -7  23   21.22    6.40
  -1  -7  23   15.35   12.46
   1   7  23   21.49   10.21
  -1  -7  24   32.42   15.76
   1   7  24   11.31    9.87
   1   7  24    3.75    5.37
  -1   7  24   13.90    7.74
  -1   7  24    6.10   14.21
   1   7  25   24.81    7.95
  -1  -7  25   41.80   17.18
   1   7  25   19.21    9.81
  -1   7  25   13.79   10.33
  -1   7  25   30.49   12.00
   1   7  26   10.91    6.21
  -1  -7  26    9.70    9.96
  -1   7  26    6.11    7.97
   1   7  26   14.91   11.54
  -1   7  26   18.72   12.02
   1   7  27   17.17   13.00
   1   7  27   39.31    9.03
  -1   7  27   36.21   15.39
  -1   7  27   30.02   11.56
   1   7  28    2.92    5.71
   1   7  28    0.06    9.18
  -1   7  28    0.83    7.39
  -1   7  28    6.31   11.14
  -1   7  29   -7.62    8.12
   1   7  29    6.24   10.38
  -1   7  29   18.45   14.41
   1   7  30   -0.42   10.01
  -1   7  30   -5.28    7.50
  -1   7  30   12.82   13.20
   1   7  31   15.62   15.88
  -1   7  31   25.77   15.50
  -1   7  32   14.61   15.94
  -1   7  33    3.51   11.74
  -1   7  34    3.49   12.38
  -1  -8 -10  128.95   12.73
  -1  -8 -10  173.15   16.22
   1  -8  -9  164.89   17.45
  -1  -8  -9  125.67   11.58
  -1  -8  -9  156.37   15.28
  -1  -8  -8  242.78   18.09
  -1  -8  -8  210.21   14.11
   1  -8  -8  282.48   21.07
   1  -8  -8  263.37   21.16
  -1  -8  -7   53.32    7.14
  -1  -8  -7   65.54    9.51
   1  -8  -7   70.76   11.11
   1  -8  -7   74.82   12.44
  -1  -8  -6   33.84    5.91
  -1  -8  -6   44.85    8.12
   1  -8  -6   61.44    9.43
   1  -8  -6   60.22   10.13
  -1  -8  -5   57.88    8.81
  -1   8  -5   54.81    7.06
   1  -8  -5   77.23   10.39
  -1  -8  -5   58.77    6.67
  -1   8  -5   61.92    5.53
   1  -8  -5   65.94    9.30
   1  -8  -4    2.11    4.70
  -1   8  -4    7.46    2.37
  -1  -8  -4   11.80    3.78
   1  -8  -4   16.66    7.24
  -1  -8  -4   11.96    5.15
  -1   8  -4    7.05    4.46
  -1  -8  -3   50.24    7.33
  -1  -8  -3   59.54    6.58
  -1   8  -3   57.01    7.90
   1  -8  -3   66.84    8.53
   1  -8  -3   43.39    8.78
  -1   8  -3   51.38    5.26
  -1  -8  -2  395.57   14.98
   1  -8  -2  330.76   20.44
  -1  -8  -2  344.42   16.93
   1  -8  -2  303.54   15.68
   1   8  -2  296.13   13.74
  -1   8  -2  365.02   16.85
  -1   8  -2  369.36   12.59
  -1  -8  -1 3618.18   44.54
  -1   8  -1 3885.15   56.17
   1  -8  -1 4404.42   65.10
  -1  -8  -1 4063.01   54.07
  -1   8  -1 3413.55   39.01
   1   8  -1 4368.66   50.51
   1  -8  -1 4220.57   52.27
  -1  -8   0 2535.06   43.09
   1  -8   0 2734.90   40.41
  -1   8   0 2561.66   47.24
  -1   8   0 2457.59   35.15
   1   8   0 2702.80   40.12
   1  -8   0 2624.99   51.14
   1   8   0 2330.36   39.16
  -1  -8   0 2716.76   39.29
  -1   8   1 4332.18   61.26
   1  -8   1 3752.02   44.28
   1   8   1 3679.55   47.42
  -1   8   1 3965.45   47.12
   1  -8   1 3909.91   58.41
  -1  -8   1 4394.77   54.47
  -1  -8   1 4371.89   49.93
   1   8   1 3661.78   47.50
   1   8   2  302.47   13.68
   1  -8   2  379.15   18.51
  -1  -8   2  309.61   14.18
   1   8   2  376.16   15.98
   1  -8   2  352.19   12.98
  -1  -8   2  323.60   15.69
  -1   8   2  360.87   20.70
  -1   8   2  307.78   13.84
   1   8   3   57.52    7.10
  -1   8   3   47.20    7.84
   1  -8   3   50.48    5.07
  -1  -8   3   60.34    7.25
  -1  -8   3   53.63    6.77
   1   8   3   52.71    6.52
  -1   8   3   57.11    6.90
   1  -8   3   57.16    8.08
   1   8   4   10.20    4.50
   1   8   4   15.15    3.63
   1  -8   4    9.22    4.37
  -1   8   4    9.10    5.87
  -1  -8   4    5.71    4.05
  -1   8   4    8.52    4.65
   1  -8   4    9.52    2.74
   1  -8   5   61.84    5.08
  -1  -8   5   77.27    8.61
   1  -8   5   57.38    8.03
  -1   8   5   62.20    7.95
   1   8   5   62.63    6.39
   1   8   5   72.14    8.58
  -1   8   5   71.75   10.89
  -1   8   6   50.41    9.39
   1   8   6   41.72    6.89
   1   8   6   37.49    5.77
   1  -8   6   40.78    4.14
   1  -8   6   46.65    7.41
  -1   8   6   58.33    8.28
  -1   8   7   73.28   11.38
   1  -8   7   59.45    4.91
   1  -8   7   53.72    7.84
   1   8   7   58.34    6.81
   1   8   7   64.17    8.91
  -1   8   8  251.19   16.43
   1  -8   8  204.37   14.59
   1   8   8  223.65   16.04
   1  -8   8  204.46    8.60
   1   8   8  202.64   11.84
  -1   8   8  265.23   20.07
   1   8   9  150.91   14.43
   1  -8   9  129.35   11.86
   1   8   9  127.17    9.99
  -1   8   9  179.04   14.51
   1  -8   9  123.96    7.02
  -1   8   9  174.24   17.46
   1  -8  10  147.86    7.97
  -1   8  10  184.57   18.12
   1   8  10  127.72   10.04
   1   8  10  168.48   15.40
  -1   8  10  216.37   15.87
   1  -8  10  139.23   12.17
  -1  -8  11   68.20   14.76
  -1   8  11   45.13    9.19
   1   8  11   87.04    8.61
   1  -8  11   99.14    6.93
  -1   8  11   41.43    8.07
   1   8  11   71.79   10.69
   1  -8  12   70.25   10.77
   1   8  12   44.69    9.16
  -1   8  12   81.47   13.58
   1   8  12   36.92    6.22
  -1  -8  12   68.89   13.61
  -1   8  12   80.79   10.79
  -1  -8  13  222.47   23.69
  -1   8  13  232.09   17.33
   1  -8  13  186.82   17.17
   1   8  13  155.68   15.56
   1   8  13  148.59   11.96
  -1   8  13  222.12   21.82
   1   8  14   22.49    6.02
  -1   8  14   27.30    9.20
   1  -8  14   35.44    8.79
  -1   8  14   23.43    7.15
   1   8  14   20.95    7.44
  -1  -8  14    9.92    8.81
  -1   8  15   53.50   12.73
   1   8  15   67.10   11.87
   1   8  15   55.02    8.02
   1  -8  15   64.84   11.33
  -1   8  15   51.86    9.60
   1  -8  16   81.48   12.44
  -1  -8  16   74.64   15.94
  -1   8  16   83.59   14.60
  -1   8  16   84.14   12.52
   1   8  16   55.45    9.12
   1   8  16   66.62   12.21
   1   8  17  183.95   19.45
   1  -8  17  245.74   19.72
  -1   8  17  219.64   23.81
  -1   8  17  216.94   19.00
  -1  -8  17  228.42   25.97
   1   8  17  209.93   15.45
  -1   8  18    6.75    9.11
   1  -8  18   10.86    7.21
  -1   8  18   12.95    7.66
  -1  -8  18   16.85   12.25
   1   8  18    8.27    8.70
   1   8  18   11.37    5.00
  -1   8  19    7.16    5.92
   1  -8  19    3.95    5.98
   1   8  19    4.22    4.77
   1   8  19    5.40    7.11
  -1  -8  19  -11.40   11.21
  -1   8  19    7.53   10.61
  -1  -8  20  122.68   21.86
   1   8  20   82.94   14.88
  -1   8  20  101.24   17.66
  -1   8  20  149.14   17.48
   1  -8  20  108.83   13.97
   1   8  20  102.82   12.05
   1   8  21   63.35   13.33
   1   8  21   53.12    9.34
  -1  -8  21   71.06   16.00
  -1   8  21   74.77   15.60
  -1   8  21   78.99   13.49
   1  -8  21   67.99   11.35
  -1   8  22   35.71    8.71
   1   8  22   60.22   10.67
   1  -8  22   54.92   10.03
  -1  -8  22   48.55   18.93
   1   8  22   53.79   13.85
  -1   8  22   40.85   14.67
  -1   8  23   34.33   12.75
   1   8  23   17.60    8.90
  -1  -8  23   25.97   12.36
  -1   8  23   43.62   11.41
   1   8  23   27.58    7.26
   1   8  24    4.20    7.52
  -1  -8  24   15.46   12.29
   1   8  24    8.83    7.88
  -1   8  24    0.19    6.51
   1   8  25   10.09    6.40
   1   8  25    6.56    7.90
  -1   8  25    9.38    7.43
  -1   8  25   20.56   13.08
   1   8  26   14.91    7.87
  -1   8  26   38.64   15.99
   1   8  26   12.59    9.77
  -1   8  26   22.68    9.82
  -1   8  27    0.93   11.05
   1   8  27   29.44    8.73
  -1   8  27   -2.34    7.06
   1   8  27   20.21   12.94
   1   8  28   15.82   11.25
   1   8  28   27.75    9.35
  -1   8  28    9.76    8.28
  -1   8  28    8.38   12.09
  -1   8  29   11.77   12.61
  -1   8  29   19.30    9.85
   1   8  29   -1.22   11.58
  -1   8  30   20.09   10.19
  -1   8  30   -3.57   13.26
   1   8  30   25.25   16.26
  -1   8  31    5.19   12.26
  -1   8  32   11.35   12.84
  -1   8  33   -8.48   14.25
  -1   8  34   29.65   17.58
  -1  -9 -11  327.77   23.61
  -1  -9 -10  117.93   14.12
  -1  -9  -9   75.87   12.24
  -1  -9  -9   66.35    8.87
   1  -9  -8   99.45   14.25
  -1  -9  -8   84.79   11.79
  -1  -9  -8   74.60    9.25
  -1  -9  -7   20.01    6.52
  -1  -9  -7   10.51    4.78
   1  -9  -7   15.28    6.40
   1  -9  -7   15.34    7.37
   1  -9  -6  104.15   13.71
   1  -9  -6  104.34   11.94
  -1  -9  -6  138.53   11.00
  -1  -9  -6  131.63   12.91
  -1   9  -5   83.65    8.91
  -1   9  -5   97.47    7.46
  -1  -9  -5   98.00   11.38
  -1  -9  -5   91.56    8.69
   1  -9  -5   96.33   11.20
   1  -9  -5   70.03   10.92
  -1  -9  -4  150.60   10.61
  -1   9  -4  157.14   11.88
  -1  -9  -4  169.68   14.07
  -1   9  -4  134.74    8.49
   1  -9  -4  213.81   15.37
   1  -9  -4  194.70   16.43
   1  -9  -3  184.29   16.51
   1  -9  -3  163.90   12.66
  -1   9  -3  227.75   14.37
  -1  -9  -3  269.99   16.01
  -1   9  -3  251.01   11.16
  -1  -9  -3  279.15   13.33
   1   9  -2  136.45    9.85
   1  -9  -2  138.50   14.24
  -1   9  -2   89.44    7.15
   1  -9  -2  130.11   10.78
  -1   9  -2   94.31    9.92
  -1  -9  -2   90.25    9.76
  -1  -9  -2   89.76    7.86
  -1  -9  -1  136.87    9.83
   1  -9  -1  175.95   14.93
  -1  -9  -1  146.48   11.66
  -1   9  -1  138.31   11.59
   1   9  -1  172.44   11.39
  -1   9  -1  129.20    8.59
   1  -9  -1  163.92   11.58
   1  -9   0    9.85    6.41
   1   9   0    6.88    4.30
  -1   9   0   13.76    6.42
  -1  -9   0    8.61    3.60
   1   9   0   16.93    4.95
   1  -9   0    3.65    3.40
  -1   9   0   10.51    3.42
  -1  -9   0    9.72    5.41
   1  -9   1  119.30   12.64
  -1  -9   1  150.88   11.74
  -1   9   1  163.62   10.09
   1   9   1  147.83   10.83
   1   9   1  129.62   10.38
  -1  -9   1  183.35   10.91
   1  -9   1  132.37    9.55
  -1   9   1  160.73   13.25
  -1   9   2  118.11   12.23
   1   9   2   89.74    9.08
   1  -9   2  128.51   12.03
  -1  -9   2  141.13    9.75
   1   9   2   84.52    8.17
  -1  -9   2  117.37   10.34
  -1   9   2  127.82    9.71
   1  -9   2   80.98    6.97
   1   9   3  267.33   13.53
  -1  -9   3  150.54   12.19
  -1   9   3  165.15   11.16
  -1  -9   3  157.52   10.71
   1  -9   3  290.92   16.69
   1  -9   3  265.14   11.57
  -1   9   3  159.86   15.01
   1   9   3  275.42   14.87
   1  -9   4  149.39   12.51
   1   9   4  150.24   11.83
  -1   9   4  165.03   14.24
  -1   9   4  191.65   12.59
   1   9   4  157.73   10.43
   1  -9   4  129.95    8.19
  -1  -9   4  187.67   13.19
  -1  -9   4  227.50   13.42
  -1   9   5   89.32   12.04
  -1   9   5  117.36   10.60
   1  -9   5   86.99    6.39
   1   9   5   96.88    9.87
   1   9   5   78.76    8.02
   1  -9   5   86.99   10.00
  -1  -9   5  112.23   10.82
  -1  -9   6  136.28   11.94
   1   9   6  165.81   10.95
  -1   9   6   89.93    9.56
   1   9   6  178.41   13.93
  -1   9   6  111.38   13.44
   1  -9   6  166.06    8.57
   1  -9   6  138.25   11.87
   1   9   7   16.95    4.79
   1  -9   7   18.49    5.41
   1  -9   7   15.50    3.21
   1   9   7   12.28    5.36
  -1   9   7   12.95    7.13
  -1   9   7    7.82    4.51
  -1   9   8   86.87   12.62
   1   9   8   79.87   10.82
   1  -9   8   71.86    9.52
   1   9   8   68.44    7.79
   1  -9   8   70.94    5.75
   1   9   9   64.43    7.80
   1   9   9   78.82   10.81
   1  -9   9   70.74    5.78
  -1   9   9   96.76   13.49
   1  -9  10  159.75    8.55
   1   9  10  164.56   15.24
  -1   9  10  184.23   18.58
  -1   9  10  203.69   15.72
   1   9  10  146.25   11.42
   1   9  11  318.27   16.75
   1  -9  11  340.87   12.87
  -1   9  11  489.13   25.22
  -1   9  11  459.22   28.79
   1   9  11  368.89   23.54
  -1   9  12   39.78   11.26
   1  -9  12   46.47   10.41
  -1   9  12   38.06    9.38
  -1  -9  12   35.09   12.34
   1  -9  12   37.54    4.81
   1   9  12   36.21    6.68
   1   9  12   43.26    9.82
  -1  -9  13   12.81    9.33
   1  -9  13   27.10    4.29
   1   9  13   25.44    7.80
  -1   9  13   18.56    5.83
  -1   9  13   20.60    9.18
   1  -9  13   12.16    6.95
   1   9  13   24.45    5.52
  -1   9  14   27.24    8.79
   1   9  14   23.83    6.08
   1  -9  14   23.81    9.14
   1   9  14   17.32    8.03
  -1  -9  14   31.61   11.69
  -1   9  14   32.44    8.20
   1   9  15   57.15   11.08
   1  -9  15   69.06   11.76
  -1   9  15   52.55   12.52
  -1   9  15   51.14   10.34
  -1  -9  15   47.49   14.39
   1   9  15   59.22    8.85
  -1   9  16    6.15    5.45
   1   9  16    1.15    3.78
   1  -9  16    4.72    6.69
  -1   9  16    4.72    8.08
   1   9  16   -0.64    5.23
  -1  -9  16    4.04    8.72
   1   9  17   62.56    9.29
  -1  -9  17   62.98   15.11
   1  -9  17   49.44   11.25
   1   9  17   55.43   13.33
  -1   9  17   76.65   13.77
  -1   9  17   94.06   13.70
   1   9  18   58.66   12.57
  -1  -9  18   51.15   17.23
   1   9  18   53.84    9.07
   1  -9  18   58.92   11.04
  -1   9  18   39.15   12.60
  -1   9  18   42.01   10.01
   1   9  19  203.05   16.77
  -1   9  19  181.47   18.19
  -1   9  19  152.57   20.99
   1  -9  19  209.04   19.55
  -1  -9  19  223.27   27.03
   1   9  19  203.06   21.32
   1   9  20   30.20    7.34
   1   9  20   41.66   11.40
   1  -9  20   43.67    9.96
  -1   9  20   13.90    7.41
  -1  -9  20   17.96   12.41
  -1   9  20   33.89   11.90
  -1  -9  21   76.17   18.93
   1   9  21   50.65   12.87
   1   9  21   50.79    9.40
  -1   9  21   50.26   11.80
  -1   9  21   50.67   14.46
   1  -9  21   42.80    9.65
  -1  -9  22   47.15   15.13
  -1   9  22   68.92   17.66
   1   9  22   52.37   14.03
  -1   9  22   26.68   10.22
   1  -9  22   33.14    9.01
   1   9  22   34.71    8.35
   1   9  23   39.35   12.08
   1   9  23   37.38    9.45
  -1   9  23   59.89   11.27
  -1   9  23   51.37   14.12
   1   9  24   48.67    9.83
  -1  -9  24   39.82   17.23
   1   9  24   46.74   14.72
  -1   9  24   50.01   12.53
  -1   9  24   45.58   15.57
   1   9  25   19.53   11.56
   1   9  25    9.87    5.81
  -1   9  25   27.87   11.26
  -1  -9  25   25.61   15.33
  -1   9  25   10.87    9.57
  -1   9  26   22.68   13.32
  -1   9  26   19.41   10.46
   1   9  26   12.39    9.69
   1   9  26   11.41    6.59
   1   9  27   17.05   10.93
   1   9  27    4.24    6.29
  -1   9  27   -0.50    8.68
  -1   9  27    9.49   11.63
  -1   9  28   11.00    8.90
   1   9  28   10.68   11.67
   1   9  28   17.09    7.99
  -1   9  28   10.89   11.86
  -1   9  29   -7.63   11.91
  -1   9  29   -0.06    7.84
   1   9  29    5.70   11.47
  -1   9  30  -10.58    9.93
   1   9  30   18.55   16.22
  -1   9  30   10.96   11.06
  -1   9  31   53.98   17.13
  -1   9  31    9.77    8.92
  -1   9  32   10.58   12.02
  -1   9  33   16.68   12.67
  -1   9  34   29.46   18.87
  -1 -10 -11  182.87   18.40
  -1 -10 -10  123.47   16.14
  -1 -10  -9   13.60    6.73
  -1 -10  -8  131.23   14.41
  -1 -10  -7  120.19   13.50
  -1 -10  -6   63.84    8.21
   1 -10  -6   47.66   10.59
   1 -10  -6   50.19    9.59
  -1 -10  -6   56.12    9.76
  -1  10  -6   54.11    7.64
   1 -10  -5    1.13    6.66
   1 -10  -5   -1.07    5.15
  -1 -10  -5    5.05    5.54
  -1  10  -5    3.99    3.16
  -1  10  -5    4.42    3.98
  -1 -10  -5    3.01    3.78
  -1  10  -4  145.02   12.54
  -1 -10  -4  175.08   15.09
  -1  10  -4  150.57    9.50
   1 -10  -4  189.12   18.36
  -1 -10  -4  146.78   11.08
  -1 -10  -3  508.16   23.36
   1 -10  -3  414.94   25.03
  -1  10  -3  461.10   16.09
   1 -10  -3  388.87   19.41
  -1 -10  -3  510.82   18.95
  -1  10  -3  481.11   21.50
  -1  10  -2  285.83   12.73
  -1 -10  -2  305.88   14.43
   1 -10  -2  252.16   18.86
  -1  10  -2  279.35   16.41
   1 -10  -2  184.51   13.13
  -1 -10  -2  279.54   17.54
   1  10  -2  196.14   12.46
   1 -10  -1   34.64    8.48
  -1 -10  -1   30.02    6.82
  -1  10  -1   27.79    4.81
  -1 -10  -1   29.33    5.16
  -1  10  -1   33.63    6.16
   1 -10  -1   40.76    6.97
   1  10  -1   37.43    6.67
  -1 -10   0   84.03    8.10
   1 -10   0   85.59    8.60
   1 -10   0   84.15   11.50
  -1  10   0   85.61   10.50
   1  10   0   93.57    9.15
  -1  10   0   71.55    7.11
  -1 -10   0  105.12   10.29
   1  10   0   92.50    8.92
   1 -10   1   36.37    5.51
   1  10   1   32.23    5.71
   1  10   1   38.72    6.81
  -1  10   1   44.94    6.05
  -1 -10   1   36.50    5.74
  -1 -10   1   37.07    7.27
   1 -10   1   43.10    8.71
  -1  10   1   34.84    7.18
  -1 -10   2  193.83   12.23
   1  10   2  275.36   15.23
  -1  10   2  206.66   15.92
   1 -10   2  279.65   13.41
   1 -10   2  261.19   17.13
   1  10   2  265.69   13.83
  -1  10   2  186.26   11.64
  -1 -10   2  199.34   14.21
   1  10   3  424.05   19.43
  -1 -10   3  449.84   20.43
  -1 -10   3  380.82   16.90
   1  10   3  450.53   17.84
  -1  10   3  378.21   17.47
   1 -10   3  512.34   17.27
  -1  10   3  458.80   24.35
   1 -10   3  449.92   22.60
  -1 -10   4  284.04   15.11
   1 -10   4  153.01    9.34
   1 -10   4  149.99   13.37
  -1  10   4  262.70   14.58
   1  10   4  158.53   12.34
  -1 -10   4  264.18   16.00
   1  10   4  145.76   10.97
  -1  10   4  239.01   17.94
   1 -10   5    9.15    5.56
  -1 -10   5    5.83    4.30
  -1  10   5    4.46    4.49
  -1  10   5    0.40    5.02
   1  10   5    4.43    3.65
  -1 -10   5    6.47    4.53
   1 -10   5    1.60    2.88
   1  10   5    4.70    4.41
  -1  10   6   40.74    7.04
   1 -10   6   53.72    8.78
  -1 -10   6   44.33    6.98
  -1  10   6   41.59    9.53
   1  10   6   63.58    7.52
   1  10   6   57.13    8.45
   1 -10   6   71.30    6.35
  -1 -10   6   48.09    8.42
   1  10   7  111.96   12.50
   1 -10   7  109.82   11.37
  -1  10   7  127.83   15.49
   1 -10   7  127.54    8.08
  -1  10   7  123.84   12.08
   1  10   7  119.82   10.60
   1 -10   8  143.40    8.36
  -1  10   8  116.27   11.83
  -1  10   8  118.60   15.51
   1  10   8  139.48   10.87
   1  10   8  111.17   11.65
  -1  10   9   13.57    8.60
   1  10   9   10.60    4.72
   1  10   9    8.66    6.18
  -1  10   9   17.37    6.13
   1 -10   9   11.71    3.44
  -1  10  10  201.43   19.41
   1  10  10  109.32   10.02
  -1  10  10  184.82   15.69
   1 -10  10  122.36    8.09
   1  10  10  135.51   14.53
   1 -10  11  172.27    9.62
   1  10  11  144.62   11.89
  -1  10  11  271.57   22.91
  -1  10  11  268.32   18.73
   1  10  11  188.38   17.40
   1 -10  12  138.55    8.84
  -1  10  12  165.36   19.11
  -1  10  12  163.88   14.96
   1  10  12  126.53   11.38
   1  10  12  168.83   17.20
   1  10  13   12.45    7.14
   1  10  13    2.88    3.33
   1 -10  13   11.04    3.41
  -1  10  13   12.34    6.48
  -1  10  13    7.99    6.18
   1 -10  13   -5.15    6.64
  -1 -10  13   19.30    9.97
  -1 -10  14   55.40   13.95
   1  10  14   25.84    8.15
   1  10  14   37.26    6.85
  -1  10  14   19.13    6.77
   1 -10  14   19.35    8.06
   1 -10  14   39.36    5.54
  -1  10  14   37.59   11.00
   1 -10  15   20.78    9.39
  -1  10  15   25.75    7.20
  -1 -10  15   13.57   10.98
   1  10  15   27.79    8.70
  -1  10  15   33.12   11.48
   1 -10  15   32.61    5.11
   1  10  15   29.22    6.85
   1  10  16   44.36    7.78
   1 -10  16   45.49    6.32
   1  10  16   41.74   10.63
  -1  10  16   55.58   10.26
  -1  10  16   57.71   13.67
  -1 -10  16   63.43   15.86
   1 -10  16   60.77   12.91
   1  10  17   44.09   10.95
   1 -10  17   42.45    6.27
  -1  10  17   52.81   10.40
   1  10  17   44.59    8.41
   1 -10  17   40.55   10.31
  -1  10  17   45.97   12.38
  -1 -10  17   35.81   15.96
  -1  10  18   37.13    9.52
  -1 -10  18   10.36   10.91
   1 -10  18   42.04   12.05
   1  10  18   28.60    9.00
  -1  10  18   39.72   14.13
   1  10  18   26.61    8.23
  -1  10  19   58.03   14.81
   1 -10  19   77.54   12.52
   1  10  19   81.75   15.01
  -1 -10  19   56.51   18.63
  -1  10  19   40.97   10.14
   1  10  19  105.52   12.65
   1  10  20   23.59    9.27
   1  10  20   16.95    5.90
  -1  10  20    6.08    7.41
  -1  10  20   17.68    9.47
   1 -10  20   24.94   10.32
  -1 -10  20   30.64   14.99
   1  10  21   21.78    9.44
  -1  10  21   31.31    9.16
   1 -10  21   20.18    8.39
  -1  10  21   33.35   14.04
   1  10  21   30.88    7.83
  -1 -10  21   40.87   16.65
   1  10  22    3.64    7.06
  -1 -10  22  -10.23   12.17
   1  10  22   16.90    7.36
  -1  10  22    5.75    7.06
  -1  10  22    4.96   10.62
  -1 -10  23   48.79   17.89
   1  10  23   21.38    6.46
  -1  10  23   48.38   14.87
  -1  10  23   30.08    9.35
   1  10  23   28.04   12.15
   1  10  24   -1.87    6.31
  -1  10  24    4.63    9.50
  -1 -10  24   -3.70   13.38
  -1  10  24    2.57    6.44
   1  10  24    6.29    8.57
  -1  10  25   10.68    8.69
  -1 -10  25   22.09   11.43
   1  10  25   29.39    9.19
   1  10  25   34.44   13.60
  -1  10  25   -0.51   10.12
  -1  10  26   13.83    8.51
  -1  10  26   18.34   10.16
   1  10  26   15.32    6.89
   1  10  26   18.40   10.93
  -1  10  27   18.56    9.86
   1  10  27   16.69    7.82
  -1  10  27   33.91   13.62
   1  10  27   10.46    8.79
  -1  10  28   16.51   11.73
   1  10  28   26.61   13.20
  -1  10  28   22.32   10.53
   1  10  28   35.49    9.41
  -1  10  29    3.25   12.20
   1  10  29   23.75   13.56
  -1  10  29   29.94   10.70
  -1  10  30    0.89    7.32
  -1  10  30   25.76   14.42
   1  10  30   16.22   15.20
  -1  10  31   -6.29    8.53
  -1  10  31   17.07   12.77
  -1  10  32   -0.47   11.98
  -1  10  33    5.52   13.42
  -1 -11 -10   74.51   12.62
  -1 -11  -9   25.36   10.20
  -1 -11  -8   99.69   13.30
  -1 -11  -7  213.55   17.94
  -1  11  -6  131.16   11.30
  -1 -11  -6  119.87   14.43
  -1  11  -5   80.82    9.58
  -1 -11  -5   76.89   12.21
  -1  11  -5   91.37    8.60
  -1  11  -4   30.90    5.21
  -1  11  -4   22.31    5.50
  -1 -11  -4   29.17    6.75
   1 -11  -4   24.72    8.58
   1 -11  -4   26.10    6.52
  -1 -11  -4   22.84    5.05
   1 -11  -3   29.89    7.22
  -1  11  -3   23.50    6.01
  -1 -11  -3   32.53    5.90
   1 -11  -3   37.60    9.98
  -1  11  -3   26.55    5.20
  -1 -11  -3   34.07    8.04
   1 -11  -2  188.23   13.82
  -1 -11  -2  199.47   16.07
  -1  11  -2  206.95   11.32
   1 -11  -2  196.83   17.68
  -1  11  -2  193.42   15.04
   1  11  -2  203.51   13.58
  -1 -11  -2  181.25   12.12
  -1 -11  -1  313.31   18.79
  -1 -11  -1  311.96   15.78
   1  11  -1  386.80   18.63
   1 -11  -1  308.09   20.98
  -1  11  -1  331.80   14.49
  -1  11  -1  310.31   18.95
   1 -11  -1  371.40   18.31
   1 -11   0   12.40    6.67
  -1 -11   0   14.91    4.31
   1  11   0   18.52    5.66
   1  11   0   13.77    5.74
  -1 -11   0   12.09    4.80
  -1  11   0   15.68    4.46
   1 -11   0   19.28    5.15
  -1  11   0    9.56    5.65
   1  11   1  327.63   16.98
  -1  11   1  351.50   20.52
   1 -11   1  325.05   16.14
  -1  11   1  382.54   16.21
  -1 -11   1  359.91   16.57
  -1 -11   1  320.37   19.54
   1  11   1  303.25   16.15
   1 -11   1  307.62   19.90
   1  11   2  201.89   14.07
  -1 -11   2  166.25   14.10
  -1  11   2  203.10   12.38
   1 -11   2  174.90   11.21
  -1 -11   2  213.10   13.01
   1  11   2  190.58   12.91
  -1  11   2  176.32   14.88
   1 -11   2  188.08   15.70
  -1  11   3   34.58    6.65
  -1 -11   3   41.66    6.42
   1 -11   3   26.38    6.92
   1  11   3   25.93    5.59
   1  11   3   25.55    5.92
  -1  11   3   33.88    8.56
   1 -11   3   26.08    5.09
  -1 -11   3   35.01    7.19
  -1  11   4   38.77    8.72
   1  11   4   24.82    5.48
   1 -11   4   31.47    7.26
  -1 -11   4   33.75    7.44
   1 -11   4   27.34    4.93
   1  11   4   32.29    6.93
  -1 -11   4   30.87    5.97
  -1  11   4   32.65    6.32
  -1  11   5   56.37    7.85
  -1 -11   5   49.09    8.15
   1  11   5   74.94    9.82
  -1  11   5   61.61   10.33
   1  11   5   85.34    9.05
   1 -11   5   86.44    7.54
  -1 -11   6  103.85   10.33
   1  11   6  108.84   11.31
  -1  11   6   90.79   10.44
  -1  11   6   85.54   12.57
   1 -11   6  114.39    8.21
   1  11   6  117.59   10.40
   1  11   7  188.32   12.97
  -1 -11   7  235.14   15.49
   1 -11   7  179.91   10.19
  -1  11   7  179.71   18.51
  -1  11   7  178.86   14.09
   1  11   7  183.24   15.33
   1 -11   8  112.08    8.03
   1  11   8   97.52    9.40
  -1  11   8   56.99    8.72
   1  11   8   80.33   11.42
  -1  11   8   63.35   13.29
   1  11   9    9.62    6.27
  -1  11   9    8.47    6.08
  -1  11   9    7.91    4.75
   1 -11   9   10.90    3.42
   1  11   9    7.23    4.14
   1 -11  10   48.54    5.49
   1  11  10   58.66   10.08
  -1  11  10   83.85   14.09
  -1  11  10   84.08   11.24
   1  11  10   52.92    7.75
  -1  11  11   33.64    8.95
   1  11  11   17.32    5.75
   1 -11  11   21.69    4.31
  -1  11  11   29.51   11.38
   1  11  11   20.87    8.33
   1  11  12   87.65   13.29
   1  11  12   76.95    9.52
  -1  11  12   81.91   13.79
   1 -11  12   83.84    7.32
  -1  11  12   83.64   11.03
   1  11  13   19.01    5.41
  -1  11  13   24.87    7.08
   1 -11  13   19.95    4.02
  -1  11  13   34.12   12.34
   1  11  13   13.46    6.49
   1 -11  14   13.72    8.48
   1 -11  14   24.11    4.48
  -1 -11  14   -2.69    9.77
  -1  11  14   17.21    7.29
   1  11  14   26.11    9.75
   1  11  14   21.04    5.62
  -1  11  14   13.72    6.22
   1  11  15   81.22   10.72
   1  11  15   86.83   13.88
  -1 -11  15   83.45   18.51
  -1  11  15   90.75   15.33
  -1  11  15   98.38   13.00
   1 -11  15   97.67   15.49
   1 -11  15   80.27    7.71
  -1 -11  16   73.40   16.80
   1  11  16   75.45   13.79
   1 -11  16   57.81    6.88
  -1  11  16  108.41   16.67
  -1  11  16  100.39   12.81
   1  11  16   57.81    9.46
   1 -11  16   46.15   11.49
   1 -11  17   49.53    6.46
   1  11  17   33.56    6.98
   1  11  17   45.91   11.71
  -1 -11  17   12.02   10.00
   1 -11  17   36.03   11.95
  -1  11  17   71.13   11.67
  -1  11  17   59.79   15.08
  -1  11  18   42.51   10.06
  -1 -11  18   40.47   14.96
   1  11  18   62.74   10.25
   1  11  18   54.24   11.97
   1 -11  18   65.06    7.33
   1 -11  18   60.62   12.11
  -1  11  18   46.80   13.58
   1  11  19   18.02    5.79
   1 -11  19   35.91   11.24
  -1  11  19   10.39    6.53
  -1  11  19   16.24   10.79
   1  11  19   21.24   10.10
  -1 -11  19    1.93   11.80
   1  11  20   77.98   11.56
  -1  11  20   55.38   11.89
   1  11  20   53.92   12.94
  -1  11  20   40.17   13.99
  -1 -11  20   71.78   21.40
   1 -11  20   66.26   13.16
  -1  11  21   74.43   13.19
   1  11  21  126.51   14.32
  -1  11  21   94.93   18.86
   1  11  21   86.63   16.39
   1 -11  21  109.57   15.88
  -1 -11  21   53.44   17.13
  -1 -11  22  -17.24   15.12
  -1  11  22   -1.35    5.95
   1  11  22  -11.43    9.30
   1  11  22    3.52    4.95
  -1  11  22    9.56    9.77
  -1 -11  23   47.11   18.36
  -1  11  23   31.70    8.86
   1  11  23   14.52    7.33
   1  11  23   14.09    9.87
  -1  11  23   25.35   10.42
  -1  11  24   14.63   13.02
   1  11  24    8.33    6.09
  -1 -11  24   -5.40   13.51
  -1  11  24    2.12    8.21
   1  11  24   -6.00    9.88
  -1  11  25    1.90    6.44
   1  11  25   -5.94    7.53
   1  11  25   10.83    9.72
  -1  11  25   -5.25    9.78
   1  11  26   -0.68    6.40
  -1  11  26   14.84    8.40
   1  11  26   -3.22    9.06
  -1  11  26   19.68   12.50
   1  11  27    4.90    8.85
  -1  11  27   36.36   15.53
   1  11  27   12.20    7.42
  -1  11  27   19.31    8.92
  -1  11  28   -2.63    8.41
  -1  11  28   -3.27   10.26
   1  11  28  -10.57    8.98
   1  11  28   -4.21    7.11
  -1  11  29   37.05   14.33
   1  11  29    9.27    6.61
   1  11  29  -10.31   12.60
  -1  11  29   40.34   12.69
  -1  11  30   13.56   12.54
  -1  11  30   14.80   10.74
  -1  11  31   22.82   13.92
  -1  11  31   45.42   15.26
  -1  11  32   24.53   15.45
  -1  11  33    9.68   14.71
  -1 -12  -8  103.63   13.97
  -1 -12  -7  202.13   19.48
  -1  12  -6   13.37    6.56
  -1 -12  -6   15.39    7.22
  -1  12  -5  139.81   13.18
  -1  12  -5  124.92    9.99
  -1 -12  -5  164.54   15.93
  -1 -12  -4  175.60   15.87
  -1  12  -4  145.90   10.70
  -1  12  -4  153.12   13.49
  -1  12  -3  258.59   17.90
  -1  12  -3  257.23   13.34
   1 -12  -2   42.41    7.93
  -1  12  -2   65.87    7.31
   1  12  -2   38.54    6.94
  -1  12  -2   54.97    8.73
  -1 -12  -2   73.86   10.96
  -1  12  -1  220.39   12.65
   1  12  -1  161.80   12.74
   1 -12  -1  176.07   13.60
  -1 -12  -1  229.83   16.74
  -1  12  -1  229.00   16.73
  -1 -12   0    6.09    5.41
   1 -12   0    9.51    4.22
  -1  12   0   11.81    4.15
   1  12   0    6.50    4.54
   1  12   0   15.55    5.75
  -1  12   0   11.94    6.27
  -1  12   1  145.07   11.20
   1 -12   1  242.40   14.39
   1  12   1  224.69   14.75
  -1 -12   1  166.79   12.11
  -1  12   1  180.39   15.62
   1  12   1  227.32   14.86
  -1 -12   1  174.40   14.80
  -1  12   2   57.14    9.32
  -1 -12   2   44.35    6.55
  -1 -12   2   51.15    8.48
   1 -12   2   67.97    7.89
   1  12   2   70.45    8.60
   1  12   2   59.20    8.22
  -1  12   2   42.04    6.12
  -1  12   3  451.28   24.66
  -1 -12   3  427.44   19.23
  -1  12   3  451.95   19.68
   1  12   3  282.03   18.09
   1 -12   3  271.69   14.12
   1  12   3  227.26   14.12
   1  12   4  150.18   13.36
  -1  12   4  197.36   13.77
  -1 -12   4  184.63   12.94
   1  12   4  131.45   11.33
  -1  12   4  180.18   17.81
   1 -12   4  138.80   10.52
   1 -12   5  129.18    9.68
   1  12   5  140.11   13.27
   1  12   5  121.37   10.53
  -1 -12   5  230.00   14.41
  -1  12   5  217.85   14.50
  -1  12   5  214.14   19.59
  -1  12   6   16.90    5.40
  -1  12   6    8.05    6.14
   1  12   6   10.73    5.31
   1 -12   6   10.73    3.90
  -1 -12   6   19.36    5.71
   1  12   6    7.06    4.81
   1 -12   7  214.82   11.69
  -1  12   7  236.93   20.17
  -1  12   7  233.00   15.88
  -1 -12   7  267.07   16.88
   1  12   7  194.31   13.54
   1  12   7  227.77   17.37
   1  12   8  113.41   13.53
   1 -12   8  112.70    8.60
  -1  12   8  132.42   12.28
  -1  12   8  120.50   15.29
   1  12   8  122.76   10.89
  -1  12   9  267.66   22.34
  -1 -12   9  304.37   18.65
   1  12   9  171.62   12.86
   1 -12   9  179.36   10.96
   1  12   9  173.78   16.77
  -1  12   9  295.05   18.81
   1  12  10  151.95   12.52
  -1  12  10  162.99   14.65
   1  12  10  147.97   15.23
   1 -12  10  167.31   10.38
  -1  12  10  157.82   18.64
  -1  12  11  236.70   17.66
   1  12  11  208.62   15.15
   1  12  11  209.64   18.38
   1 -12  11  202.56   11.35
   1 -12  12    6.27    2.97
   1  12  12    4.35    3.63
  -1  12  12   -1.52    6.71
   1  12  12    3.00    5.13
  -1  12  12    4.32    4.14
   1  12  13  127.23   16.45
   1  12  13  100.95   11.11
  -1  12  13  111.75   13.21
   1 -12  13  114.14    8.82
  -1  12  13  105.59   16.17
  -1  12  14   19.51    7.26
   1  12  14   22.08    7.02
   1  12  14   22.05    6.79
   1 -12  14   28.20    5.04
  -1  12  14   10.97    9.38
   1 -12  15    9.55    3.72
   1  12  15    9.67    7.10
   1 -12  15   10.68   10.20
  -1  12  15    1.68    8.51
  -1 -12  15   -8.89    9.98
  -1  12  15   -0.30    5.68
   1  12  15    7.02    3.99
  -1 -12  16  155.60   23.38
   1 -12  16  221.32   12.50
   1  12  16  168.82   15.13
  -1  12  16  158.60   16.39
   1 -12  16  149.08   20.07
   1  12  16  195.63   20.95
  -1  12  16  165.23   22.07
   1 -12  17  163.07   11.04
  -1  12  17  120.29   20.04
  -1 -12  17  132.69   22.39
   1  12  17  170.25   21.05
   1 -12  17  201.59   22.28
   1  12  17  171.29   15.54
  -1  12  17  123.29   15.14
  -1  12  18   87.63   13.53
  -1 -12  18   39.01   14.92
   1  12  18   60.91   13.54
   1  12  18   56.57    9.81
   1 -12  18   66.80   14.82
  -1  12  18   88.52   17.78
  -1  12  19   75.46   13.15
  -1  12  19   65.32   15.56
   1 -12  19   71.65   14.58
   1  12  19   44.18    9.11
   1  12  19   58.51   14.12
  -1 -12  19   75.44   17.77
  -1  12  20   58.30   11.46
  -1 -12  20   84.62   21.01
   1  12  20   87.92   16.35
  -1  12  20   53.53   14.94
   1 -12  20   79.36   15.12
   1  12  20   87.42   12.59
  -1  12  21   13.10    7.75
   1 -12  21   22.68   10.06
   1  12  21   16.08    7.37
   1  12  21   -3.41    9.70
  -1 -12  21   19.72   14.45
  -1  12  21   13.73    8.60
  -1  12  22   54.08   15.31
   1  12  22   40.43   12.85
  -1  12  22   71.83   13.41
   1  12  22   37.68    9.12
   1  12  23   14.13    8.34
  -1  12  23   24.72   12.23
  -1 -12  23    3.53   12.80
   1  12  23   11.65    6.11
  -1  12  23    8.60    8.48
  -1  12  24    6.65    6.33
   1  12  24    2.31    5.86
  -1 -12  24    7.75   13.95
  -1  12  24   12.91   13.28
   1  12  24   -0.32    9.57
   1  12  25   26.73   15.68
  -1  12  25   33.26   10.50
   1  12  25   45.91   10.51
  -1  12  25   30.37   11.73
   1  12  26    2.85    8.16
   1  12  26   13.15    8.98
  -1  12  26   -4.99   11.81
  -1  12  26   -5.39    6.77
   1  12  27   14.53   14.90
  -1  12  27   20.68   10.19
  -1  12  27   14.98   13.11
   1  12  27   18.80    7.93
  -1  12  28    3.38    8.78
   1  12  28   15.65    8.44
   1  12  28   13.24   12.32
  -1  12  28   35.33   15.85
  -1  12  29   12.65   11.07
   1  12  29   11.86    8.80
  -1  12  29    8.93   11.40
   1  12  29    3.86   10.90
  -1  12  30   18.54   15.76
  -1  12  30   14.99   10.77
  -1  12  31   21.15   14.13
  -1  12  31    3.18   10.03
  -1  12  32  -15.92   18.87
  -1  12  33   27.14   18.14
  -1  13  -6   99.51   10.91
  -1  13  -5   59.88    8.83
  -1  13  -5   64.52    7.92
  -1  13  -4  228.55   16.91
  -1  13  -4  220.25   13.47
  -1  13  -3   28.14    6.56
  -1  13  -3   47.07    6.62
  -1  13  -2  186.59   12.42
  -1  13  -2  179.29   15.23
  -1  13  -1  220.99   17.12
   1  13  -1  268.12   17.04
  -1  13   0  336.19   16.26
  -1  13   0  317.58   20.18
   1  13   0  334.10   18.65
   1  13   0  337.52   19.08
   1  13   1  161.85   13.52
  -1  13   1  265.44   15.28
   1  13   1  198.94   15.08
  -1  13   1  300.33   20.44
   1 -13   1  187.63   13.68
  -1  13   2  254.67   19.26
  -1  13   2  259.10   15.07
   1  13   2  207.68   14.00
   1  13   2  204.61   15.42
   1 -13   2  190.29   13.22
   1  13   3   30.21    7.13
   1 -13   3   39.34    6.51
  -1  13   3   62.66   10.37
  -1  13   3   67.52    8.22
   1  13   3   44.23    7.67
  -1  13   4  393.46   19.17
   1  13   4  206.65   16.07
   1 -13   4  224.72   13.56
  -1  13   4  382.68   23.73
   1  13   4  222.30   14.69
   1 -13   5   51.17    6.63
  -1  13   5   34.78    6.23
   1  13   5   46.92    6.61
  -1  13   5   38.87   10.50
   1  13   5   51.61    8.32
   1  13   6  105.74   12.38
   1 -13   6   84.65    8.13
  -1  13   6  102.41   10.59
   1  13   6  100.85   10.50
  -1  13   6   95.54   13.87
  -1  13   7   17.06    7.94
   1 -13   7   14.13    3.77
   1  13   7    9.86    5.69
   1  13   7   17.21    5.04
  -1  13   7    6.65    4.74
   1  13   8   68.74    8.98
   1 -13   8   72.60    7.41
   1  13   8   63.98   10.02
  -1  13   8   45.18   10.55
  -1  13   8   38.07    7.02
  -1  13   9   78.50   10.13
  -1  13   9   95.33   14.97
   1  13   9  117.98   11.41
   1  13   9  122.38   15.02
   1 -13   9  129.60    9.77
  -1  13  10   -1.24    6.30
   1  13  10   10.34    5.95
  -1  13  10   20.59    6.41
   1 -13  10   13.76    4.16
   1  13  10    7.95    4.57
   1  13  11  285.91   21.71
   1  13  11  229.01   16.57
   1 -13  11  257.80   13.57
  -1  13  11  298.54   19.84
  -1  13  11  338.94   27.71
   1  13  12  106.39   13.99
   1 -13  12  148.64   10.19
  -1  13  12  118.37   18.15
   1  13  12  132.81   13.03
  -1  13  12  106.16   12.98
  -1  13  13   52.01   12.46
   1 -13  13   33.28    5.57
   1  13  13   46.91   10.64
   1  13  13   34.10    7.16
  -1  13  13   59.21   10.50
  -1  13  14   32.30    8.13
   1  13  14   28.54    6.57
  -1  13  14   17.88   10.06
   1  13  14   26.65    8.60
   1 -13  14   23.00    4.51
  -1  13  15   35.50    9.46
   1 -13  15   44.08   12.52
  -1 -13  15   22.30   12.68
   1  13  15   15.88    9.27
   1 -13  15   20.59    4.59
  -1  13  15   25.62   12.81
   1  13  15   25.10    7.43
  -1 -13  16   93.93   19.79
   1 -13  16  121.70    9.82
   1 -13  16   84.35   17.04
   1  13  16  107.82   16.41
   1  13  16  130.96   13.74
  -1  13  16   63.96   11.38
  -1  13  16   89.77   17.33
  -1  13  17   73.37   12.53
   1  13  17  118.87   13.03
  -1  13  17  110.82   19.07
   1  13  17  109.59   16.58
   1 -13  17  120.09    9.72
  -1 -13  17   80.26   19.70
   1 -13  17  124.06   19.13
  -1  13  18    8.27    6.27
   1  13  18   18.83    8.18
   1  13  18   19.85   12.14
  -1 -13  18   12.77   11.34
   1 -13  18   22.54   12.29
  -1  13  18    6.82    8.15
  -1  13  19   71.57   16.14
  -1 -13  19   77.20   20.14
   1  13  19   73.06   15.85
   1  13  19   37.74    8.76
  -1  13  19   74.38   11.95
   1 -13  19   52.30   15.08
  -1  13  20   91.19   14.04
  -1  13  20   84.68   18.52
   1  13  20   97.27   17.34
  -1 -13  20   82.83   21.01
   1  13  20   61.83   10.15
   1 -13  20   73.90   15.35
  -1  13  21    2.10    6.97
  -1  13  21   18.77   12.35
   1  13  21   15.67   11.63
  -1 -13  21    8.33   15.77
   1  13  21    4.82    5.79
  -1  13  22   48.27   16.74
   1  13  22   41.32   13.17
  -1 -13  22   42.81   18.14
  -1  13  22   49.45   12.48
   1  13  22   31.03    9.49
  -1 -13  23   36.96   18.23
   1  13  23    9.83    9.53
  -1  13  23   24.21   12.15
   1  13  23   18.93    8.42
  -1  13  23   -5.31    6.81
   1  13  24    6.26   10.37
  -1  13  24   42.70   10.53
   1  13  24   17.44    7.57
  -1  13  24   50.62   16.58
   1  13  25   18.69   11.71
  -1  13  25    6.82    7.04
   1  13  25   19.95    8.31
  -1  13  25   19.07   12.18
  -1  13  26   28.51   13.48
   1  13  26   34.66   10.41
  -1  13  26   28.37   10.16
   1  13  26   25.12   12.99
  -1  13  27   20.94   15.14
   1  13  27   -0.64    6.39
  -1  13  27   19.99   11.34
   1  13  27    4.82   10.94
  -1  13  28    6.91   13.25
   1  13  28    8.39    7.38
   1  13  28   -1.34   11.04
  -1  13  28    0.62    8.46
   1  13  29    8.03   13.75
  -1  13  29   -6.55    8.78
   1  13  29    7.72    7.56
  -1  13  29    2.06   12.77
  -1  13  30    3.43   11.04
  -1  13  30   20.89   11.12
  -1  13  31   13.76   10.07
  -1  13  31    8.58   14.03
  -1  13  32  -15.85   16.57
  -1  13  33   -8.51   12.41
  -1  14  -6  252.04   17.82
  -1  14  -5    6.57    6.52
  -1  14  -5   -4.19    3.93
  -1  14  -4  305.34   20.48
  -1  14  -4  300.80   16.22
  -1  14  -3  266.63   19.23
   1  14  -3  230.15   16.15
  -1  14  -3  275.32   15.27
  -1  14  -2   51.72    7.28
  -1  14  -2   59.77   10.28
   1  14  -2   33.10    7.59
  -1  14  -1   86.36   10.89
  -1  14  -1   87.85    8.73
   1  14  -1   78.69   10.09
   1  14   0  108.23   12.17
   1  14   0  103.73   11.96
  -1  14   0   96.56   12.34
  -1  14   0   87.68    9.18
   1  14   1   66.14    9.22
  -1  14   1   65.30    7.93
  -1  14   1   70.92   11.29
   1  14   1   81.96   10.05
   1  14   2   46.79    8.55
   1  14   2   50.78    7.81
  -1  14   2   44.80    6.87
  -1  14   2   45.78    9.24
  -1  14   3  240.78   19.58
   1  14   3  258.07   16.40
   1  14   3  271.66   18.37
  -1  14   3  206.63   14.71
  -1  14   4  501.36   22.13
   1 -14   4  306.03   16.22
  -1  14   4  511.36   28.11
   1  14   4  329.59   18.69
   1  14   4  326.41   20.75
  -1  14   5   13.00    6.85
   1  14   5   -3.90    4.03
   1  14   5    6.58    5.56
  -1  14   5   -6.73    3.57
   1 -14   5    5.51    4.00
   1  14   6  252.09   19.17
   1  14   6  237.26   16.21
  -1  14   6  261.60   17.33
   1 -14   6  242.65   14.35
  -1  14   7 1030.74   34.29
   1  14   7  840.52   29.74
   1  14   7  905.54   35.07
  -1  14   7  958.43   43.16
   1 -14   7  844.79   25.88
  -1  14   8   53.12    8.95
   1  14   8   37.97    7.95
  -1  14   8   66.18   12.64
   1  14   8   45.77    9.00
   1 -14   8   44.71    6.55
  -1  14   9   99.84   12.00
   1  14   9   72.67    9.35
   1  14   9   68.07   10.97
  -1  14   9   77.69   12.60
   1 -14   9   84.79    8.40
   1  14  10   88.12   13.14
   1 -14  10   80.17    8.18
   1  14  10   84.71   10.44
  -1  14  10   68.66   12.84
   1  14  11   42.91    9.95
   1  14  11   39.26    8.06
  -1  14  11   75.50   10.87
  -1  14  11   50.69   12.45
   1 -14  11   47.81    6.77
   1 -14  12   31.98    5.44
  -1  14  12   31.81    8.12
   1  14  12   25.45    7.09
   1  14  12   26.48    6.89
  -1  14  12   31.07   10.88
  -1  14  13   14.52    5.99
   1 -14  13   20.99    4.92
   1  14  13   13.85    5.96
   1  14  13    9.75    5.52
  -1  14  13   26.73   11.24
   1  14  14   99.49   11.90
  -1  14  14   96.33   12.69
   1 -14  14   88.99    8.52
   1  14  14   77.76   13.19
  -1  14  14   72.77   16.04
  -1  14  15   44.19    9.39
   1  14  15   48.19   12.54
   1 -14  15   39.01    6.39
   1  14  15   46.32    9.07
  -1  14  15   39.91   11.46
   1  14  16    6.57    8.39
   1  14  16    3.90    5.06
  -1 -14  16    4.18    9.96
   1 -14  16    3.94    9.06
  -1  14  16    8.48    6.05
  -1  14  16  -10.00    8.50
   1 -14  16    6.52    4.45
   1  14  17  105.73   16.16
  -1  14  17   94.04   13.83
   1 -14  17  147.46   20.38
  -1  14  17  109.64   19.34
  -1 -14  17   94.55   20.21
   1  14  17  168.76   16.24
  -1  14  18  169.53   17.93
   1  14  18  131.65   18.33
   1  14  18  106.20   13.09
   1 -14  18   96.42   19.50
  -1 -14  18  153.57   26.55
  -1  14  18  157.10   23.47
  -1  14  19   18.06    8.66
   1  14  19   -3.96    8.15
   1  14  19   25.08    8.85
  -1 -14  19   -0.22   12.84
  -1  14  19   17.69   10.18
   1 -14  19   30.66   12.14
   1  14  20   51.35    9.80
  -1  14  20   23.09   10.22
  -1 -14  20   27.33   15.55
  -1  14  20   37.60    9.81
   1  14  20   36.75   12.99
   1 -14  20   45.55   14.18
  -1  14  21   63.29   12.60
  -1 -14  21   17.68   15.48
   1  14  21   51.35   10.19
   1  14  21   43.47   12.10
  -1  14  21   54.48   15.21
  -1  14  22    8.83    9.43
  -1 -14  22   15.04   16.95
  -1  14  22    7.45    6.37
   1  14  22    4.54    5.07
   1  14  22   27.93   13.19
  -1  14  23   71.13   17.36
  -1  14  23   93.43   16.12
   1  14  23   56.13   11.66
  -1 -14  23   89.43   24.93
   1  14  23   54.10   15.29
   1  14  24    7.98    6.87
  -1  14  24    7.92    8.32
  -1  14  24   -7.20   10.89
   1  14  24   15.28   12.53
   1  14  25    9.02    7.72
   1  14  25    9.46   11.19
  -1  14  25    7.73   11.36
  -1  14  25   22.70   10.62
  -1  14  26   61.86   13.89
  -1  14  26   21.75   16.48
   1  14  26   25.44   15.20
   1  14  26   27.67    9.52
  -1  14  27   17.13   15.29
   1  14  27   23.99   10.25
  -1  14  27   43.03   11.85
   1  14  27   28.68   14.21
   1  14  28    2.42    6.93
   1  14  28   12.57   16.98
  -1  14  28  -13.48   11.40
  -1  14  28   -5.70    7.24
  -1  14  29   15.90   14.45
  -1  14  29   24.97   10.80
   1  14  29   -5.70    9.24
  -1  14  30    7.75   12.48
  -1  14  30    2.79    7.79
  -1  14  31   -0.08    9.57
  -1  14  31    6.70   12.67
  -1  14  32   -0.47   12.31
  -1  15  -6  146.90   14.24
  -1  15  -5   18.87    7.42
  -1  15  -5   15.06    3.84
  -1  15  -4   67.60    8.72
  -1  15  -4   76.02   10.89
  -1  15  -3   95.40   10.08
  -1  15  -3   99.48   12.30
   1  15  -2   38.06    7.73
  -1  15  -2   63.79    8.15
  -1  15  -2   53.45    9.43
   1  15  -1   34.67    7.57
  -1  15  -1   24.90    7.22
  -1  15  -1   15.14    4.93
   1  15   0   14.96    6.70
   1  15   0    2.52    4.87
  -1  15   0    9.24    4.71
  -1  15   0    1.87    5.91
   1  15   1   21.38    6.65
   1  15   1   28.35    8.05
  -1  15   1   25.93    6.59
  -1  15   1   41.21    7.02
  -1  15   2   37.28    8.85
   1  15   2   59.59    9.11
  -1  15   2   39.50    6.84
   1  15   2   61.21    9.34
   1  15   3   98.89   11.56
  -1  15   3   80.15   13.22
   1  15   3   84.06   10.64
  -1  15   3   64.41    8.69
   1  15   4   61.98    9.05
  -1  15   4  100.96   13.73
  -1  15   4  102.69   11.37
   1  15   4   71.49   10.40
   1  15   5    9.98    5.44
   1  15   5   14.97    5.11
  -1  15   5   24.54    6.50
  -1  15   5   24.86    7.52
  -1  15   6  181.57   19.46
   1  15   6  158.04   13.63
   1  15   6  182.60   16.00
  -1  15   6  219.07   16.04
  -1  15   7    7.05    5.35
   1  15   7    5.30    4.46
  -1  15   7    7.20    7.08
   1  15   7   -3.59    4.98
   1  15   8   25.06    8.06
   1 -15   8   11.93    4.45
  -1  15   8   14.70    4.86
  -1  15   8   10.67    6.51
   1  15   8   24.83    6.55
  -1  15   9    9.84    9.19
  -1  15   9   -0.68    3.95
   1  15   9    7.51    5.20
   1 -15   9    6.52    3.75
   1  15   9    0.11    4.84
  -1  15  10   11.85    5.30
   1  15  10    3.04    4.17
  -1  15  10    7.40    7.20
   1  15  10   -1.14    6.99
   1 -15  10    3.36    2.81
   1  15  11  139.43   13.42
   1 -15  11  142.54   11.49
  -1  15  11  268.33   19.91
   1  15  11  158.85   17.53
  -1  15  11  248.62   23.87
   1  15  12   -1.47    4.44
  -1  15  12   12.68    6.43
   1  15  12    6.05    5.84
  -1  15  12    8.90    7.19
   1 -15  12   10.38    3.72
  -1  15  13  191.51   17.50
   1 -15  13  156.79   11.76
   1  15  13  134.27   13.68
   1  15  13  166.71   18.76
  -1  15  13  178.74   21.67
   1  15  14  104.90   15.21
  -1  15  14  141.24   20.22
  -1  15  14  130.36   15.41
   1 -15  14   87.54    9.29
   1  15  14   84.19   11.54
  -1  15  15  193.57   23.90
  -1  15  15  176.33   17.81
   1  15  15  116.14   16.46
   1  15  15  105.82   13.00
  -1  15  16    7.22    9.62
   1  15  16    5.78    6.96
   1  15  16    7.27    5.52
  -1  15  16    7.10    5.65
   1  15  17  125.82   14.82
   1 -15  17  171.94   22.92
  -1  15  17  199.50   19.98
   1  15  17  148.24   19.91
  -1 -15  17  187.17   28.06
  -1  15  17  172.98   23.94
   1 -15  18   53.75   15.17
  -1  15  18   60.14   15.62
   1  15  18   60.06   11.06
  -1  15  18   60.15   12.02
   1  15  18   59.99   14.74
  -1 -15  18   69.04   21.18
   1 -15  19   38.41   14.44
  -1  15  19   31.41   14.21
   1  15  19   29.74    8.13
  -1 -15  19   -7.47   14.74
   1  15  19   32.52   10.02
  -1  15  19    4.14    6.19
   1  15  20   33.76    8.83
  -1 -15  20   41.05   19.07
   1  15  20   39.08   12.82
  -1  15  20   36.02   10.69
  -1  15  20   44.13   12.36
  -1 -15  21   27.62   15.53
   1  15  21   42.72   10.26
   1  15  21   35.36   11.51
  -1  15  21   23.50   11.18
  -1  15  21   22.95    8.80
  -1  15  22   16.79    9.06
  -1  15  22    0.53   10.76
   1  15  22    2.11   10.75
  -1 -15  22   30.32   18.62
   1  15  22    5.84    6.88
  -1 -15  23    8.04   16.66
  -1  15  23   -0.63   12.11
   1  15  23    1.54    8.64
  -1  15  23   11.54    8.88
   1  15  23   26.25    8.86
  -1  15  24   15.78   14.37
   1  15  24    1.29    6.02
   1  15  24    6.88   10.80
  -1  15  24    4.13    6.90
  -1  15  25   19.73   12.72
   1  15  25   17.10   15.86
   1  15  25   52.99   12.65
  -1  15  25   30.53   10.60
   1  15  26   -1.19    9.06
  -1  15  26   10.47    8.90
  -1  15  26    9.46   13.11
   1  15  26    0.01    6.65
   1  15  27   23.62   13.13
  -1  15  27   16.29   14.59
  -1  15  27   39.71   12.06
   1  15  28  -16.51   14.27
   1  15  28   -0.26    7.18
  -1  15  28    7.72   12.77
  -1  15  28   16.90    9.78
  -1  15  29   18.68   10.31
  -1  15  29   12.33   13.69
   1  15  29    4.71    8.43
  -1  15  30    4.29   11.96
  -1  15  30    3.25   12.62
  -1  15  31   -8.59    8.06
  -1  15  31   -7.33   15.28
  -1  15  32  142.84   37.16
  -1  16  -6   12.30    4.89
  -1  16  -5  264.10   16.86
  -1  16  -5  263.20   19.57
  -1  16  -4    7.36    5.43
  -1  16  -4   10.50    5.83
  -1  16  -3   16.00    4.75
   1  16  -3   30.35    7.96
  -1  16  -3   20.30    5.98
  -1  16  -2  639.35   30.41
  -1  16  -2  631.22   24.88
  -1  16  -1   94.19   10.59
  -1  16  -1  100.30   13.35
  -1  16   0    6.87    3.87
   1  16   0    8.40    4.15
   1  16   0    2.73    4.36
  -1  16   0    7.27    4.77
   1  16   1   98.65   11.82
  -1  16   1  169.96   13.97
   1  16   1  107.52   13.02
  -1  16   1  146.55   16.42
  -1  16   2  548.60   31.13
   1  16   2  595.70   26.64
  -1  16   2  524.73   23.60
   1  16   3   16.99    6.10
   1  16   3   19.33    6.07
  -1  16   3    9.71    4.10
  -1  16   4   12.62    6.28
  -1  16   4    5.90    4.31
   1  16   4   -0.92    4.90
   1  16   4    0.79    4.74
   1  16   5  269.49   18.07
  -1  16   5  244.28   21.92
  -1  16   5  217.94   15.95
   1  16   5  275.20   20.22
   1  16   6   19.27    7.81
  -1  16   6   12.94    5.50
   1  16   6   21.30    6.64
  -1  16   6   23.40    9.05
  -1  16   7   30.43    6.38
   1  16   7   27.10    7.37
   1  16   7   23.64    5.84
  -1  16   7   21.17    7.61
  -1  16   8   11.43    7.28
   1  16   8    9.08    5.44
   1  16   8   11.85    5.73
  -1  16   8    2.50    4.45
  -1  16   9   40.02    7.97
   1  16   9   73.78   10.40
  -1  16   9   44.89   11.27
   1  16   9   69.54   11.57
  -1  16  10   19.14    6.43
  -1  16  10   29.88    9.91
   1  16  10    7.35    5.68
   1  16  10   19.33    7.84
   1  16  11   82.45   13.44
   1  16  11   79.83   10.55
  -1  16  11   51.75   11.65
  -1  16  11   54.02   10.89
  -1  16  12   10.90    8.86
   1  16  12   18.84    7.24
   1  16  12   13.17    7.89
  -1  16  12   11.79    4.82
   1  16  13   57.22   12.53
   1  16  13   50.90    9.10
  -1  16  13   76.82   11.39
  -1  16  13   78.84   15.73
  -1  16  14    2.90    6.18
   1  16  14    3.54    4.71
  -1  16  14   -1.20    6.77
   1  16  14    1.85    6.10
   1  16  15    8.33    6.15
  -1  16  15   -0.44    4.89
  -1  16  15   14.27   10.53
   1  16  15   -6.11    6.41
  -1  16  16    6.35    8.95
   1  16  16    3.62    4.80
  -1  16  16  -14.62    7.73
   1  16  16   11.96   10.27
  -1  16  17  130.15   20.68
  -1  16  17  114.33   14.54
   1  16  17   69.56   13.48
  -1 -16  17   96.93   24.26
   1 -16  17   75.34   18.71
   1  16  17   53.26    9.96
   1  16  18   65.68   11.32
  -1  16  18  126.13   16.42
  -1 -16  18  102.08   21.27
   1  16  18  104.75   16.90
   1 -16  18   74.48   17.28
  -1  16  18  112.86   20.81
   1 -16  19   91.51   19.91
  -1  16  19  114.97   16.04
   1  16  19   73.34   14.18
  -1 -16  19   80.74   20.70
  -1  16  19   79.06   17.48
   1  16  19   58.32   10.58
  -1 -16  20   -3.84   12.78
   1  16  20   21.45   10.99
  -1  16  20   33.42    9.85
  -1  16  20   14.02    8.76
   1  16  20   26.96    8.75
  -1  16  21   40.60   11.75
   1  16  21   29.53    9.17
  -1  16  21   26.96   16.61
  -1 -16  21    8.02   14.65
   1  16  21   26.20   11.20
   1  16  22   12.64    9.76
  -1 -16  22   14.70   13.75
  -1  16  22    0.30    9.25
  -1  16  22    7.02    7.92
   1  16  22    8.95    5.72
  -1  16  23   28.14   14.85
   1  16  23   21.81   11.75
  -1  16  23   15.98    8.68
   1  16  23   12.62    6.56
  -1  16  24    8.90   13.04
   1  16  24    6.41    7.76
  -1  16  24   15.42    9.62
   1  16  24  -16.37   11.67
   1  16  25    4.76    9.70
   1  16  25   13.00    9.32
  -1  16  25    3.65   13.26
  -1  16  25   16.21   10.82
  -1  16  26   12.60   15.37
  -1  16  26   15.07    8.52
   1  16  26   11.82   12.25
   1  16  26   19.20    9.57
  -1  16  27   49.93   13.32
  -1  16  27   13.21   16.39
   1  16  27   47.04   17.02
   1  16  27   31.42   10.95
   1  16  28    3.54    7.13
  -1  16  28  -10.04   15.15
  -1  16  28    4.93    8.33
   1  16  28   19.01   13.49
   1  16  29    9.67    8.53
  -1  16  29   19.15   11.01
  -1  16  29   -1.68   12.77
  -1  16  30   -2.73   12.80
  -1  16  30   29.22   13.80
  -1  16  31   -0.05   13.08
  -1  16  31   -4.88   10.84
  -1  17  -6   99.94   12.00
  -1  17  -5   97.56   13.18
  -1  17  -5   95.79   10.80
  -1  17  -4    4.76    4.86
  -1  17  -4   11.95    4.67
  -1  17  -3   45.09    8.09
  -1  17  -3   45.38    9.90
   1  17  -3   70.90   10.36
  -1  17  -2  106.73   12.97
  -1  17  -2  110.40   11.39
   1  17  -2   89.16   11.83
  -1  17  -1    7.92    3.79
  -1  17  -1   11.74    4.77
   1  17  -1   14.24    5.70
  -1  17   0    3.94    6.00
  -1  17   0    3.07    4.85
   1  17   0    3.42    4.93
   1  17   0    7.37    5.59
   1  17   1    5.09    4.31
  -1  17   1    3.88    5.03
  -1  17   1   10.89    4.50
   1  17   1    0.92    4.45
   1  17   2  114.45   12.86
  -1  17   2   96.36   14.06
   1  17   2  107.39   12.60
  -1  17   2   93.07   11.06
   1  17   3   38.50    7.64
  -1  17   3   68.46    9.24
   1  17   3   52.14    9.42
   1  17   4    5.44    4.68
   1  17   4   13.30    4.63
  -1  17   4   -0.13    3.83
  -1  17   4    9.03    6.59
   1  17   5   90.29   11.11
   1  17   5   94.99   12.53
  -1  17   5   70.64   12.42
  -1  17   5   55.66    9.10
   1  17   6  103.75   11.44
  -1  17   6   62.30   12.09
  -1  17   6   64.25    9.99
   1  17   6   84.45   12.64
  -1  17   7   32.82    7.79
  -1  17   7   35.89   10.09
   1  17   7   52.51    9.39
   1  17   7   60.73   10.27
  -1  17   8   29.02    7.54
   1  17   8   40.80    8.35
   1  17   8   42.56    9.64
  -1  17   8   42.79   10.69
  -1  17   9   23.68    6.97
   1  17   9   39.15    8.14
   1  17   9   45.81   11.00
  -1  17   9   39.03   11.88
   1  17  10   11.40    6.01
  -1  17  10    7.06    5.34
   1  17  10   -0.82    5.91
  -1  17  10    3.15    8.63
  -1  17  11   55.34    9.80
  -1  17  11   59.18   14.25
   1  17  11   38.47    8.54
   1  17  11   45.61   10.68
   1  17  12    7.47    5.40
  -1  17  12   -0.14    7.03
  -1  17  12   -0.69    5.83
   1  17  12   11.86    5.48
   1  17  13   40.46    8.82
  -1  17  13   30.46    9.51
  -1  17  13   33.55    9.12
   1  17  13   23.12    8.79
  -1  17  14   27.62   11.54
   1  17  14   50.78    9.34
   1  17  14   32.60   10.61
  -1  17  14   25.32    8.11
  -1  17  15    4.85    7.48
   1  17  15    8.45    6.52
   1  17  15   10.12    8.76
  -1  17  15    5.48    6.54
  -1  17  16   32.45    8.63
   1  17  16   20.74    9.34
   1  17  16   23.70    6.98
  -1  17  16   11.44    7.53
  -1  17  17   21.51   11.84
   1  17  17   19.17    9.37
  -1  17  17   20.37    7.85
   1  17  17   17.03    6.94
   1  17  18   27.32    8.96
  -1 -17  18   11.75   14.65
  -1  17  18   39.75   12.24
  -1  17  18   66.00   12.12
   1 -17  18   44.71   15.32
   1  17  18   33.25   10.40
  -1  17  19   27.21   13.42
   1  17  19    9.68    7.28
  -1 -17  19   10.59   16.36
  -1  17  19    8.94    7.89
   1 -17  19   -1.32   11.52
   1  17  19   -2.22    6.93
  -1 -17  20   48.69   22.23
  -1  17  20   38.55   14.91
  -1  17  20   19.87    7.99
   1  17  20    7.15    9.34
   1  17  20   12.33    7.00
   1  17  21   36.31   13.06
  -1  17  21   28.45   14.18
   1  17  21   32.00    9.07
  -1  17  21   15.47    8.57
   1  17  22    4.86    9.17
  -1  17  22    4.86   10.08
  -1  17  22    0.66    5.84
   1  17  22   13.84    6.86
  -1 -17  22   -2.40   14.49
  -1  17  23   34.38   15.17
  -1  17  23   22.95   10.35
   1  17  23   29.28   12.36
   1  17  23   44.27   11.41
  -1  17  24   15.39   14.91
  -1  17  24   -0.74    7.05
   1  17  24   15.36   11.36
   1  17  24    7.85    7.29
  -1  17  25   11.82    8.27
  -1  17  25   12.50   13.31
   1  17  25   -6.24    9.57
   1  17  25   -1.67    7.18
   1  17  26   -9.42   11.50
  -1  17  26   11.47   14.80
   1  17  26    2.37    8.22
  -1  17  26   14.08    8.13
  -1  17  27   17.60   16.81
   1  17  27   10.77    8.09
  -1  17  27    8.03    8.94
   1  17  27   20.16   13.10
  -1  17  28   12.00   17.56
  -1  17  28    7.94    9.33
   1  17  28    5.35    7.47
  -1  17  29   13.04    8.56
  -1  17  29   17.66   15.67
   1  17  29   16.56    9.92
  -1  17  30    8.16   12.97
  -1  17  30    6.51    8.36
  -1  17  31    3.54   14.19
  -1  17  31    1.43    8.84
  -1  18  -6  137.55   14.79
  -1  18  -5  208.41   18.65
  -1  18  -5  191.08   15.60
  -1  18  -4   16.86    6.12
  -1  18  -4   18.24    7.31
  -1  18  -3   23.91    6.28
   1  18  -3   38.00    9.00
  -1  18  -3   31.02    7.83
  -1  18  -2   10.76    5.35
  -1  18  -2   10.07    6.64
   1  18  -2   -2.48    4.55
  -1  18  -1   84.71   12.63
  -1  18  -1  103.26   11.38
  -1  18   0    8.78    4.86
   1  18   0    9.15    5.45
   1  18   0   14.50    7.12
  -1  18   0    7.87    5.62
  -1  18   1  106.46   14.65
   1  18   1  103.38   12.85
   1  18   1   97.54   12.80
  -1  18   1  126.14   12.62
  -1  18   2   14.07    5.37
   1  18   2   12.95    5.98
   1  18   2    5.49    4.40
  -1  18   2   13.84    7.69
   1  18   3   30.09    8.22
  -1  18   3   37.15   10.62
   1  18   3   28.88    7.34
  -1  18   3   40.18    7.73
   1  18   4   16.03    7.07
  -1  18   4   10.15    8.16
  -1  18   4    7.68    4.17
   1  18   4   15.97    6.08
   1  18   5  177.95   17.93
   1  18   5  181.89   16.04
  -1  18   5  209.85   20.99
  -1  18   5  145.36   14.64
  -1  18   6  110.70   14.78
   1  18   6  152.59   15.94
   1  18   6  146.45   14.42
  -1  18   6  107.84   12.58
   1  18   7   10.14    5.48
   1  18   7   21.71    8.51
  -1  18   7   28.89    7.96
  -1  18   7   16.26    6.98
  -1  18   8   94.90   15.62
   1  18   8  119.42   14.44
  -1  18   8   83.28   11.89
   1  18   8  110.08   13.56
  -1  18   9   14.35    6.56
   1  18   9   11.71    5.99
   1  18   9   -0.01    5.43
  -1  18   9    1.53    7.12
   1  18  10   92.33   13.79
  -1  18  10  102.27   18.20
  -1  18  10   74.07   11.04
   1  18  10  103.36   12.51
   1  18  11   18.61    7.27
  -1  18  11   13.39    4.84
  -1  18  11   14.55    8.90
   1  18  11   16.06    8.73
   1  18  12  120.89   13.89
   1  18  12  120.97   15.81
  -1  18  12  100.99   18.95
  -1  18  12   85.66   12.56
  -1  18  13   58.43   10.92
   1  18  13   83.20   13.77
   1  18  13   84.18   12.02
  -1  18  13   58.80   13.93
   1  18  14   33.06   11.26
   1  18  14   22.04    7.28
  -1  18  14   46.79   10.67
  -1  18  14   34.88   11.83
  -1  18  15   27.23   12.13
   1  18  15   36.20    8.62
  -1  18  15   20.03    8.27
   1  18  15   46.35   13.42
   1  18  16   30.88   12.59
   1  18  16   36.74    9.18
  -1  18  16   25.58   11.06
  -1  18  16   15.41    7.95
   1  18  17   37.46    9.20
   1  18  17   36.17   13.13
  -1  18  17   34.57    9.28
  -1  18  17   36.03   13.68
  -1  18  18   69.99   16.36
   1  18  18   62.12   13.83
  -1 -18  18   73.34   22.32
   1 -18  18   37.40   16.87
   1  18  18   52.42   11.51
  -1  18  18   88.30   13.70
   1  18  19   57.97   11.42
   1  18  19   35.16   10.93
  -1  18  19   80.09   14.72
  -1 -18  19   47.52   21.25
  -1  18  19   94.79   18.29
   1  18  20   28.00   10.25
   1  18  20   26.53   10.67
  -1  18  20   49.21   10.94
  -1 -18  20   51.64   20.24
  -1  18  20   47.52   15.22
   1  18  21   22.00    9.50
  -1  18  21    6.17    6.34
  -1 -18  21   31.53   20.16
   1  18  21    6.93   11.23
  -1  18  21    4.77   10.60
   1  18  22    2.08    7.26
   1  18  22    1.68    6.11
  -1  18  22    7.14   11.39
  -1  18  22    5.39    7.37
   1  18  23   36.01   10.37
  -1  18  23   23.53    7.34
   1  18  23   14.07    9.39
  -1  18  23   32.02   17.13
   1  18  24   -4.08    6.38
   1  18  24   -5.30    8.70
  -1  18  24   10.87   14.15
  -1  18  24   10.93    9.70
   1  18  25    0.26    8.77
  -1  18  25    2.60    9.07
   1  18  25   18.04    8.12
  -1  18  25    6.74   12.73
   1  18  26    2.00    8.66
  -1  18  26    9.36   14.93
   1  18  26    4.50    7.02
  -1  18  26    5.31    8.81
  -1  18  27   11.41   15.53
   1  18  27   24.38   13.37
   1  18  27    3.73    7.03
  -1  18  27    5.36    7.46
  -1  18  28   10.61   14.99
  -1  18  28   19.06   11.74
   1  18  28    5.79    8.51
  -1  18  29    4.07    9.79
   1  18  29   17.49   10.64
  -1  18  29    9.03   16.83
  -1  18  30   10.63   12.05
   1  18  30   12.84   10.56
  -1  18  30   17.35   11.43
  -1  19  -6  166.78   16.62
  -1  19  -5   -2.19    5.12
  -1  19  -4   47.14    8.46
  -1  19  -4   59.09   11.58
  -1  19  -3   57.80    9.10
   1  19  -3   35.56    8.26
  -1  19  -3   45.86   10.36
  -1  19  -2   12.34    6.93
  -1  19  -2   12.71    5.87
  -1  19  -1   92.04   12.76
   1  19  -1   74.78   11.43
  -1  19  -1   96.63   11.46
   1  19   0    2.69    5.56
  -1  19   0    9.92    7.39
   1  19   0    6.17    4.53
  -1  19   0    9.39    4.36
  -1  19   1   63.23   12.26
   1  19   1  104.78   13.31
   1  19   1   94.62   12.49
  -1  19   1   51.30    8.45
   1  19   2   36.87   10.21
   1  19   2   19.03    7.43
  -1  19   2   22.93    7.96
  -1  19   2   31.00    7.40
   1  19   3   55.60   10.91
   1  19   3   62.23   10.65
  -1  19   3   39.71    9.35
  -1  19   3   32.23    6.76
   1  19   4   55.97   10.07
   1  19   4   53.17   10.76
  -1  19   4   34.54   10.35
  -1  19   4   34.07    7.81
  -1  19   5    6.33    6.03
  -1  19   5   10.96    6.79
   1  19   5    8.14    6.28
   1  19   5   10.26    6.30
  -1  19   6  132.53   18.23
   1  19   6  172.88   18.26
   1  19   6  171.75   16.20
   1  19   7   19.43    6.50
   1  19   7    9.47    7.57
  -1  19   7   30.15    9.16
  -1  19   7   12.52    6.40
  -1  19   8   67.81   11.23
   1  19   8   87.42   14.33
  -1  19   8   73.17   14.13
   1  19   8   84.13   12.01
  -1  19   9   30.28    8.27
  -1  19   9   27.41    9.97
   1  19   9   45.95    9.40
   1  19   9   35.34    9.53
   1  19  10    8.07    7.21
  -1  19  10   -1.87    5.59
   1  19  10   12.09    6.64
  -1  19  10    0.49    7.22
  -1  19  11   63.33   15.27
  -1  19  11   58.84   10.67
   1  19  11  102.02   15.61
   1  19  11  116.32   14.13
   1  19  12  177.41   19.52
   1  19  12  162.64   16.76
  -1  19  12  291.90   22.00
  -1  19  12  331.96   31.79
   1  19  13  125.47   15.19
  -1  19  13  165.86   17.40
  -1  19  13  161.73   23.07
   1  19  13  124.24   17.15
   1  19  14   26.17    8.48
  -1  19  14   14.08    5.94
   1  19  14   27.95    9.04
  -1  19  14   10.80    8.97
  -1  19  15  114.83   20.43
   1  19  15  133.07   18.54
   1  19  15  122.42   15.48
  -1  19  15   98.92   13.94
   1  19  16    2.94    6.05
  -1  19  16   11.73    6.79
  -1  19  16   19.27    9.76
   1  19  16   21.15   11.18
   1  19  17   38.10   12.12
   1  19  17   21.43    7.51
  -1  19  17   22.27   10.06
  -1  19  17   30.13    9.63
  -1  19  18   16.68    7.31
  -1  19  18   23.43   13.11
  -1 -19  18   21.68   17.15
   1  19  18   16.27   13.09
   1  19  18   17.94    7.66
   1  19  19   32.91   13.75
  -1  19  19   69.18   13.58
  -1 -19  19   59.84   23.94
   1  19  19   40.05   10.03
  -1  19  19   56.89   15.00
   1  19  20   -5.40    9.92
   1  19  20   10.22    7.90
  -1 -19  20  -16.49   17.29
  -1  19  20   -8.75   10.39
  -1  19  20    5.22    7.95
  -1  19  21    6.61    7.66
   1  19  21    2.98    7.10
  -1  19  21   11.92   13.26
   1  19  21    4.36    9.47
   1  19  22   22.23   12.61
  -1  19  22    6.71    7.71
   1  19  22   13.71    8.62
  -1  19  22   -5.63    9.80
   1  19  23   12.38   10.15
  -1  19  23  -18.89    8.95
  -1  19  23   -0.74   10.30
   1  19  23   31.89   11.20
  -1  19  24   15.97   10.54
   1  19  24   27.23    9.52
   1  19  24    0.34    9.71
  -1  19  24   11.57    8.85
  -1  19  25   -0.70    7.55
   1  19  25   -2.24    9.56
   1  19  25   -2.53    7.52
  -1  19  25   19.75   14.89
  -1  19  26  -14.36   11.08
  -1  19  26    7.88   10.09
   1  19  26   12.88    9.42
   1  19  26    4.78   10.82
  -1  19  27  -13.26   15.16
  -1  19  27    6.67    8.04
   1  19  27  -10.28    9.02
  -1  19  28   14.27    9.02
  -1  19  28   20.90   14.41
   1  19  28   12.86   10.12
  -1  19  29    6.50   10.26
  -1  19  29   35.75   18.09
   1  19  29   42.45   13.88
  -1  19  30   50.48   20.17
  -1  20  -6  497.70   29.07
  -1  20  -5   39.21    8.97
  -1  20  -4   49.18   10.75
  -1  20  -4   42.30    8.60
  -1  20  -3   87.58   11.94
   1  20  -3   52.57    9.78
  -1  20  -3   70.61   11.99
  -1  20  -2   67.23   12.74
  -1  20  -2   44.24    8.70
   1  20  -2   76.50   10.85
  -1  20  -1  162.48   17.36
  -1  20  -1  132.18   13.98
   1  20  -1  133.38   14.96
  -1  20   0   24.91    7.22
  -1  20   0   15.71    5.74
   1  20   0   17.15    6.94
  -1  20   1  140.14   17.43
   1  20   1  144.15   15.94
  -1  20   1  136.26   14.35
   1  20   1  168.79   17.02
  -1  20   2   74.30   13.50
   1  20   2   46.99   10.15
  -1  20   2   76.53   10.91
   1  20   2   59.10   11.27
   1  20   3   78.32   12.02
   1  20   3   94.51   13.36
  -1  20   3   51.56    9.12
  -1  20   3   69.75   13.52
  -1  20   4   57.45   10.40
  -1  20   4   70.46   13.78
   1  20   4   42.72    9.59
   1  20   4   45.54   10.75
  -1  20   5   58.35   14.28
  -1  20   5   51.53    9.52
   1  20   5   69.27   11.04
   1  20   5   38.04   10.31
  -1  20   6  359.50   28.56
  -1  20   6  378.02   23.71
   1  20   6  460.81   29.03
   1  20   6  450.98   26.84
   1  20   7    4.04    5.86
   1  20   7    8.45    5.82
  -1  20   7    8.62    9.13
  -1  20   7   -3.66    5.36
  -1  20   8   49.86   10.71
   1  20   8   74.37   12.36
   1  20   8   74.34   12.58
  -1  20   8   67.64   14.17
   1  20   9   14.03    8.49
  -1  20   9   20.36    6.65
   1  20   9   15.22    6.84
  -1  20   9   19.33   10.61
   1  20  10   59.47   12.01
  -1  20  10   52.72   12.89
  -1  20  10   42.41    9.56
   1  20  10   47.16   10.43
   1  20  11   12.21    8.73
  -1  20  11   13.16    7.70
  -1  20  11   13.25    7.61
   1  20  11   13.13    7.23
  -1  20  12  268.65   21.36
   1  20  12  253.65   23.46
  -1  20  12  224.47   25.24
   1  20  12  256.25   21.50
  -1  20  13   13.23   12.86
   1  20  13  -10.78    7.63
   1  20  13    8.97    8.78
  -1  20  13   -3.46    5.25
   1  20  14    3.36    6.86
   1  20  14    7.73    6.53
  -1  20  14    0.45    5.34
  -1  20  15   26.16   11.40
   1  20  15    4.17    6.33
   1  20  15   12.76    7.67
  -1  20  15    6.05    6.15
   1  20  16    8.01    6.91
  -1  20  16    3.16    8.39
   1  20  16  -10.18    6.83
  -1  20  16    2.24    6.26
  -1  20  17   10.49    6.88
   1  20  17   31.13    8.83
   1  20  17   18.21    9.37
   1  20  18    2.64    8.06
   1  20  18   -1.72    6.16
  -1  20  18   -3.25    8.01
   1  20  19   16.58   11.33
   1  20  19   22.92    9.09
  -1  20  19   18.94   12.48
  -1  20  19    6.96    6.02
   1  20  20   16.77    7.12
  -1 -20  20   11.37   19.17
  -1  20  20   25.53   10.90
  -1  20  20   21.50    8.58
   1  20  20   30.30   13.03
   1  20  21   55.95   17.58
  -1  20  21   72.63   14.99
   1  20  21   41.47   12.03
  -1  20  21   60.30   18.29
  -1  20  22   12.36   10.08
   1  20  22   25.50    9.75
  -1  20  22    9.84    8.96
  -1  20  23   10.83    9.71
   1  20  23   24.92   13.00
  -1  20  23   21.61   13.32
   1  20  23   53.22   13.02
   1  20  24   11.26    8.40
  -1  20  24   12.21    9.25
  -1  20  24   20.36   13.78
   1  20  24    1.04    8.88
  -1  20  25   46.58   16.96
   1  20  25   30.65   11.49
  -1  20  25   35.23   12.26
   1  20  25   24.33   12.28
  -1  20  26   20.42    9.64
  -1  20  26   31.90   16.50
   1  20  26   36.59   11.84
   1  20  26   11.25   10.53
  -1  20  27    8.94   11.04
  -1  20  27    6.67   12.78
   1  20  27    5.56    8.03
  -1  20  28   15.94   13.04
   1  20  28   -8.46   10.26
  -1  20  28   13.35   14.51
   1  20  29   21.32   11.53
  -1  20  29   26.29   14.93
  -1  21  -6   45.99   10.17
  -1  21  -5   84.47   13.20
  -1  21  -4   94.64   12.59
  -1  21  -4   80.32   13.19
  -1  21  -3  154.50   18.25
  -1  21  -3  177.40   17.58
   1  21  -3  162.08   16.53
  -1  21  -2   30.02    9.52
   1  21  -2   29.89    7.35
  -1  21  -2   37.83    8.60
   1  21  -1   20.93    8.36
  -1  21  -1   18.40    6.27
  -1  21  -1   11.05    6.99
  -1  21   0   43.16   10.44
   1  21   0   32.84    8.61
  -1  21   0   25.40    7.42
   1  21   1    7.34    5.58
   1  21   1   21.88    8.18
  -1  21   1   25.80    8.11
  -1  21   1   11.49    6.52
  -1  21   2   39.14   10.60
   1  21   2   29.97    8.22
  -1  21   2   44.98    8.72
   1  21   2   28.96    8.79
  -1  21   3  177.06   16.46
  -1  21   3  157.41   19.22
   1  21   3  160.79   17.49
   1  21   3  166.14   17.54
  -1  21   4   75.56   13.97
   1  21   4   94.72   13.73
   1  21   4   77.76   12.73
  -1  21   4   42.80    9.25
   1  21   5   67.63   10.92
   1  21   5   58.37   11.02
  -1  21   5   42.95   11.52
  -1  21   5   39.88   10.19
   1  21   6   71.70   12.25
  -1  21   6   90.59   15.72
  -1  21   6   76.73   11.82
   1  21   6   60.40   11.09
  -1  21   7   40.87   11.64
   1  21   7   18.62    7.46
   1  21   7   26.59    8.35
  -1  21   8   42.35    9.45
   1  21   8   98.44   14.97
   1  21   8   83.78   12.61
  -1  21   8   93.67   17.13
   1  21   9  131.51   16.09
  -1  21   9  195.46   18.61
  -1  21   9  198.81   22.70
   1  21   9  128.64   17.35
  -1  21  10   54.17   10.35
  -1  21  10   61.72   13.87
   1  21  10   46.81   10.73
   1  21  10   52.52   12.09
   1  21  11    4.10    6.35
  -1  21  11    5.29    6.76
   1  21  11   14.69    8.96
  -1  21  11    0.11    5.61
   1  21  12   66.54   13.65
   1  21  12   63.15   11.01
  -1  21  12   94.54   14.06
   1  21  13   14.18    7.56
  -1  21  13   42.80   12.43
  -1  21  13   48.13   10.82
   1  21  13   21.38    8.18
   1  21  14   26.74    9.39
  -1  21  14   25.98    8.91
  -1  21  14    1.01    8.86
   1  21  14   16.16    7.90
  -1  21  15   37.11    9.84
   1  21  15   20.84    9.41
   1  21  15   37.36    9.68
  -1  21  15   28.55   12.80
  -1  21  16   25.98   12.21
   1  21  16   22.85   10.12
   1  21  16    9.22    6.68
  -1  21  16   13.83    8.93
  -1  21  17   11.92    7.23
  -1  21  17   23.30   13.19
   1  21  17    5.03    8.45
   1  21  17    2.46    6.06
   1  21  18   -8.12    8.81
   1  21  18   19.96    9.40
  -1  21  18    0.30    8.07
  -1  21  18   -1.23    7.28
  -1  21  19   30.22   12.79
  -1  21  19   20.62    7.78
   1  21  19   22.16   11.05
   1  21  19    8.25    8.35
  -1 -21  19   39.26   21.56
  -1  21  20   18.16   13.44
   1  21  20   42.15   13.78
  -1 -21  20   63.67   25.76
   1  21  20   50.83   12.27
  -1  21  20   21.66   10.05
   1  21  21    0.70    7.44
  -1  21  21   28.01   10.67
   1  21  21   22.96   11.18
  -1  21  21   20.82   11.86
   1  21  22   37.50   14.77
   1  21  22    9.62    8.17
  -1  21  22   40.06   10.96
  -1  21  22   37.09   16.44
  -1  21  23   18.62   11.50
   1  21  23   35.48   11.46
  -1  21  23    3.22    7.03
   1  21  23   28.51    9.87
   1  21  24    1.81    7.95
  -1  21  24    9.70    7.03
   1  21  24   28.76   14.48
  -1  21  24   -1.93   10.00
  -1  21  25   13.53   12.57
   1  21  25   18.41   13.47
   1  21  25   24.97   11.25
  -1  21  25   18.78   11.18
  -1  21  26    2.37    8.53
   1  21  26   -0.43    7.61
  -1  21  26    2.50    9.39
  -1  21  27   15.65    9.50
  -1  21  27    3.37   10.35
   1  21  27   10.64    9.64
  -1  21  28   31.23   17.51
   1  21  28    3.42    9.33
  -1  21  29   17.58   13.31
  -1  22  -6   92.89   13.96
  -1  22  -5   33.33   10.91
  -1  22  -4   62.75   11.51
  -1  22  -4   87.82   13.57
  -1  22  -3   99.12   13.43
  -1  22  -3   77.12   13.63
   1  22  -3   84.89   13.74
  -1  22  -2   46.50   10.11
   1  22  -2   29.06    8.55
  -1  22  -2   35.33    9.95
  -1  22  -1    3.30    4.86
   1  22  -1    7.71    5.90
  -1  22  -1    9.58    6.95
  -1  22   0  134.84   17.34
   1  22   0  133.81   16.64
  -1  22   0   99.78   13.04
   1  22   1   -9.04    8.16
  -1  22   1    3.64    6.37
  -1  22   1    1.78    4.70
   1  22   1   10.03    7.41
   1  22   2   53.34   10.63
   1  22   2   36.96    9.15
  -1  22   2   29.96   11.02
  -1  22   2   29.94    8.76
  -1  22   3   69.62   14.48
  -1  22   3   78.26   12.34
   1  22   3  108.23   14.57
   1  22   3   92.54   14.46
  -1  22   4  128.23   14.63
   1  22   4   74.86   13.27
  -1  22   4  122.92   17.98
   1  22   4   97.54   14.59
  -1  22   5   52.98   10.48
   1  22   5   40.36   10.18
   1  22   5   25.04    7.50
  -1  22   5   56.98   13.24
   1  22   6  105.14   15.15
  -1  22   6  140.05   19.34
  -1  22   6  138.56   15.69
   1  22   7   27.70   10.49
   1  22   7   18.37    7.32
  -1  22   7    5.26    8.10
  -1  22   7    8.37    6.18
  -1  22   8  115.84   15.12
   1  22   8   87.66   15.42
   1  22   8   65.86   11.67
  -1  22   8  129.19   18.30
  -1  22   9  -12.95   10.48
  -1  22   9    4.75    5.12
   1  22   9   -1.50    5.89
   1  22   9    1.56    5.59
  -1  22  10   24.70    7.37
   1  22  10    9.43    8.03
   1  22  10    1.43    5.20
  -1  22  10   18.84    8.02
  -1  22  11   34.87    9.66
   1  22  11   18.36   10.01
  -1  22  11   34.36   12.45
   1  22  11   28.53    9.39
   1  22  12   -3.36    6.54
  -1  22  12   -3.48    7.12
  -1  22  12   -4.78    8.31
   1  22  12    2.99    6.00
   1  22  13   11.84    8.09
   1  22  13    9.21    7.25
  -1  22  13    2.54    5.90
  -1  22  13   -2.85    8.62
  -1  22  14    9.50    5.91
   1  22  14    1.73    6.17
  -1  22  14   12.27   11.12
   1  22  14    6.97    6.65
   1  22  15   32.40   10.26
  -1  22  15   27.20    8.45
  -1  22  15   12.41    8.97
   1  22  15   33.21   11.92
  -1  22  16   -0.74    9.14
  -1  22  16   -7.33    6.96
   1  22  16   -6.68    9.94
   1  22  16   -2.27    6.14
   1  22  17   -5.07    8.54
  -1  22  17   -0.87    6.09
   1  22  17    2.57    7.07
  -1  22  17   -9.28   11.48
  -1  22  18   87.05   23.39
   1  22  18   62.34   14.23
   1  22  18  111.88   16.22
  -1  22  18   55.49   12.20
  -1  22  19   26.96   14.02
   1  22  19   32.73    9.58
   1  22  19   17.41    9.61
  -1  22  19   16.15    8.56
  -1  22  20   11.88   11.93
  -1  22  20   -3.83    7.71
   1  22  20   25.28   11.30
   1  22  20   27.17   11.10
  -1  22  21    7.76   11.23
  -1  22  21   17.35    9.13
   1  22  21    7.18    9.59
   1  22  21   25.89   10.33
   1  22  22    3.42    9.18
   1  22  22   10.42    8.05
  -1  22  22   27.17   15.44
  -1  22  22    2.32    7.36
   1  22  23   -0.20    9.48
   1  22  23   15.17    8.21
  -1  22  23    0.63    6.98
  -1  22  23   21.33   13.52
  -1  22  24    3.19   11.67
  -1  22  24   22.52   10.07
   1  22  24    9.91   11.24
   1  22  24   12.85   11.92
  -1  22  25   23.98   14.03
   1  22  25    8.83   10.46
  -1  22  25   -0.42    7.90
   1  22  25    4.10    7.67
  -1  22  26    5.83   13.09
   1  22  26    5.41    7.44
  -1  22  26   10.43   11.03
  -1  22  27    2.96   10.57
   1  22  27   20.31   10.63
  -1  22  28    3.85   11.95
  -1  23  -6  169.25   19.34
  -1  23  -5  100.03   15.35
  -1  23  -4   58.28   13.06
  -1  23  -3  229.01   20.32
  -1  23  -3  198.01   21.21
  -1  23  -2    3.21    6.57
   1  23  -2   12.96    7.45
  -1  23  -2    4.07    5.94
  -1  23  -1   22.17    8.00
   1  23  -1   51.82   11.10
  -1  23  -1   38.98    9.58
   1  23   0   10.49    8.01
  -1  23   0    9.84    8.65
  -1  23   0   21.79    8.04
   1  23   1   36.39   11.43
  -1  23   1   67.87   13.02
  -1  23   1   53.06   10.79
  -1  23   2    9.88    7.47
  -1  23   2    0.44    4.90
   1  23   2   11.02    8.22
   1  23   2    9.41    6.82
   1  23   3  212.58   21.90
   1  23   3  196.02   19.61
  -1  23   3  130.17   15.89
  -1  23   3  128.87   18.00
  -1  23   4   44.13   10.07
   1  23   4   39.81   11.11
   1  23   4   47.61   12.51
  -1  23   4   70.76   15.27
   1  23   5   80.09   13.45
  -1  23   5  130.21   18.70
   1  23   5  130.51   16.76
  -1  23   5  122.79   15.05
  -1  23   6  265.51   21.54
   1  23   6  178.33   19.54
   1  23   6  182.93   18.97
  -1  23   6  262.21   25.82
  -1  23   7   14.71   10.69
   1  23   7    8.46    6.69
  -1  23   7    4.97    5.18
   1  23   7    0.42    6.26
   1  23   8   35.47   10.36
  -1  23   8   69.14   15.50
  -1  23   8   51.69   10.84
   1  23   8   32.58   11.12
   1  23   9   65.64   13.04
  -1  23   9   45.06    9.64
   1  23   9   57.29   12.19
  -1  23   9   49.97   13.11
   1  23  10   72.98   14.25
  -1  23  10   98.97   13.91
   1  23  10   66.17   13.10
  -1  23  10   99.58   17.74
  -1  23  11   -6.85    7.53
   1  23  11    2.03    7.54
  -1  23  11   -1.86    5.71
   1  23  11    3.21    6.39
  -1  23  12   60.46   15.19
   1  23  12   36.08   11.95
   1  23  12   11.23    7.64
  -1  23  12   41.35   10.44
   1  23  13   -0.42    6.88
   1  23  13    5.74    8.12
  -1  23  13    2.16    8.05
  -1  23  13    5.53    5.63
   1  23  14   27.10   10.42
  -1  23  14   -2.77    5.37
  -1  23  14   33.94   11.61
   1  23  14   14.54    7.79
  -1  23  15   16.87    8.03
   1  23  15   26.78   10.53
  -1  23  15   21.49    9.57
   1  23  15   28.11   11.71
   1  23  16   14.98    8.30
   1  23  16   15.19    8.81
  -1  23  16   12.94   11.08
  -1  23  16    6.82    8.28
   1  23  17   36.75   12.45
   1  23  17   19.76    9.35
  -1  23  17   61.89   12.78
  -1  23  17   29.39   12.99
  -1  23  18    0.19    6.80
   1  23  18    3.96    8.52
  -1  23  18   -0.81    9.25
   1  23  18   15.87    8.48
   1  23  19    7.58    8.72
   1  23  19   12.83    8.75
  -1  23  19   17.10   16.16
  -1  23  19    6.18    7.48
   1  23  20    5.07    8.82
  -1  23  20    2.38    6.83
  -1  23  20  -13.99   11.89
   1  23  20   12.40    9.48
  -1  23  21  106.86   17.84
   1  23  21   72.20   15.44
   1  23  21   54.06   14.16
  -1  23  21  120.16   25.61
  -1  23  22   10.86    9.33
   1  23  22   13.20    8.40
  -1  23  22   18.41   11.90
   1  23  22   11.01    9.09
  -1  23  23   16.70   13.83
   1  23  23   -7.31   10.42
   1  23  23    7.11    9.45
  -1  23  23   -1.29    7.12
   1  23  24   23.23   11.24
  -1  23  24   -9.91   11.06
  -1  23  24   -3.42    8.60
   1  23  24    6.36    7.82
   1  23  25    0.15    8.51
  -1  23  25   16.52   14.39
  -1  23  25    6.27    8.87
  -1  23  26   17.25   13.82
   1  23  26   11.09    9.78
  -1  23  27    0.17   11.58
  -1  24  -6    1.53    6.04
  -1  24  -5   32.68    9.56
  -1  24  -4   12.29    6.84
  -1  24  -3   93.60   15.17
  -1  24  -3  104.10   14.99
  -1  24  -2   23.11    6.92
  -1  24  -2   43.66   11.09
   1  24  -2   24.71    8.26
  -1  24  -1   15.23    8.83
  -1  24  -1   15.58    7.73
   1  24  -1    2.55    5.65
   1  24   0   -6.54    6.40
  -1  24   0   10.87    8.17
  -1  24   0    4.75    6.22
  -1  24   1    2.69    7.22
   1  24   1    2.22    6.35
  -1  24   1   11.27    7.79
   1  24   2   34.63    9.35
   1  24   2   25.47    8.59
  -1  24   2   16.24    8.26
  -1  24   2   25.60    8.50
   1  24   3  106.90   16.22
   1  24   3  112.73   16.66
  -1  24   3  165.24   20.30
  -1  24   3  147.51   16.83
   1  24   4   16.78    8.55
   1  24   4   16.35    7.35
  -1  24   4   21.54    9.80
  -1  24   4   23.67    8.06
  -1  24   5   30.84   11.29
   1  24   5   37.30   10.27
   1  24   5   43.27   10.70
  -1  24   5   27.73    8.74
   1  24   6    1.92    6.91
  -1  24   6   12.38    5.23
   1  24   6   -2.58    7.41
   1  24   7   54.87   11.83
   1  24   7   48.35   12.38
  -1  24   7   89.59   16.88
  -1  24   7   71.66   12.70
   1  24   8  119.81   16.53
  -1  24   8   94.51   18.50
   1  24   8  119.53   16.95
  -1  24   8   83.39   13.13
   1  24   9   37.27   11.29
   1  24   9   60.75   13.14
  -1  24   9   86.83   18.25
  -1  24   9   59.71   12.30
  -1  24  10   12.80   11.58
   1  24  10   13.98    7.36
  -1  24  10    0.39    6.08
   1  24  10   11.25    6.91
  -1  24  11   34.48   11.47
  -1  24  11   40.52   10.16
   1  24  11   42.81   11.34
   1  24  11   53.33   12.49
  -1  24  12   14.46   10.74
   1  24  12   -1.64    7.73
   1  24  12    8.48    7.37
  -1  24  12   14.68    7.76
  -1  24  13   33.33   10.16
   1  24  13    6.29    6.46
   1  24  13   10.22    8.92
  -1  24  13   17.34   10.12
   1  24  14   11.55    7.74
   1  24  14   12.14    7.95
  -1  24  14   17.04    7.64
  -1  24  14  -12.61    9.87
  -1  24  15   10.33    7.13
   1  24  15   -4.73    7.63
   1  24  15   15.97   10.13
  -1  24  15    9.17    8.85
  -1  24  16    1.42    6.22
   1  24  16    2.68    6.84
   1  24  16   10.80    8.74
   1  24  17   -1.29    7.72
   1  24  17    7.13    6.14
  -1  24  17   -1.28    6.70
  -1  24  17    0.69    9.17
  -1  24  18   13.44    9.07
   1  24  18    8.11    8.73
   1  24  18   29.24   12.19
  -1  24  18   10.15    8.88
  -1  24  19   -6.04   10.89
  -1  24  19    4.02    6.87
   1  24  19   -4.35    8.47
   1  24  19    3.00    7.07
  -1  24  20   -9.01    7.52
   1  24  20    8.01    9.66
  -1  24  20   12.83   12.62
   1  24  20    6.04    8.21
  -1  24  21   -1.28   10.48
  -1  24  21    2.10    9.49
   1  24  21   37.30   13.13
   1  24  21   10.46   11.36
  -1  24  22   -1.50    9.92
   1  24  22   10.83    9.60
  -1  24  22   -7.98   13.80
   1  24  22  -22.34   11.62
   1  24  23    4.52    9.07
   1  24  23   25.25   13.05
  -1  24  23   18.26   13.83
  -1  24  23    6.54    9.32
   1  24  24   10.98   10.35
  -1  24  24   14.28    8.73
  -1  24  25  -12.54   14.38
   1  24  25    9.86    9.75
  -1  24  26   -0.43   13.70
  -1  25  -5    0.56    6.13
  -1  25  -4   25.87    8.67
  -1  25  -3   -4.67    7.13
  -1  25  -3    2.94    5.63
   1  25  -2    3.45    6.38
  -1  25  -2   11.18    7.74
  -1  25  -2   -1.29    5.54
  -1  25  -1   15.77    8.66
  -1  25  -1    2.45    6.07
   1  25  -1    1.36    5.96
   1  25   0   83.65   13.89
  -1  25   0  113.52   15.47
  -1  25   0  103.70   16.68
  -1  25   1   12.89    8.67
  -1  25   1    6.42    6.81
   1  25   1    0.15    7.29
  -1  25   2   -1.03    6.76
   1  25   2   -0.30    7.77
  -1  25   2   14.44    8.97
  -1  25   3    5.06    6.39
  -1  25   3   -2.48    7.64
   1  25   3    8.02    7.49
   1  25   3   -2.70    6.54
   1  25   4   23.46    9.29
  -1  25   4   53.85   13.31
  -1  25   4   64.37   12.06
   1  25   4   31.87    9.84
  -1  25   5    1.17    6.13
   1  25   5    5.02    7.62
   1  25   5    9.47    8.13
  -1  25   5   -2.73    7.44
  -1  25   6    1.38    5.65
   1  25   6   -4.91    8.43
   1  25   6    0.88    7.82
  -1  25   6   21.64   11.01
   1  25   7   10.04    8.14
   1  25   7   -7.08    8.38
  -1  25   7    6.29    6.78
  -1  25   7    4.16    8.83
  -1  25   8    7.60    7.56
  -1  25   8    3.08    6.47
   1  25   8   10.89    8.87
   1  25   8    6.92    7.75
  -1  25   9    2.85    9.15
  -1  25   9   17.07    8.52
   1  25   9   24.83    9.74
   1  25   9   14.37    8.74
   1  25  10    8.47    8.18
   1  25  10   17.03    9.38
  -1  25  10    0.81    7.56
  -1  25  10    9.11    8.27
  -1  25  11   14.92    8.36
   1  25  11    4.61    7.22
   1  25  11   20.17   11.47
  -1  25  11   21.08   11.51
   1  25  12   13.87    8.21
  -1  25  12   22.67   10.67
   1  25  12   25.28   11.05
  -1  25  12   16.66    8.62
  -1  25  13    5.82    9.14
   1  25  13    5.84    7.58
  -1  25  13   15.78    8.38
   1  25  13    6.41    6.31
   1  25  14  -12.24    8.11
   1  25  14    2.34    7.38
  -1  25  14   20.29    9.16
  -1  25  14    5.06    9.59
  -1  25  15   43.07   12.71
  -1  25  15   26.36   12.60
   1  25  15    9.22    7.93
   1  25  15   16.61    9.44
   1  25  16    6.29    7.46
  -1  25  16   27.46   13.25
  -1  25  16   17.24    9.98
   1  25  16   31.24   12.86
  -1  25  17   23.06   13.43
   1  25  17   23.46   11.06
  -1  25  17   23.55    9.34
   1  25  17   25.56   10.34
  -1  25  18    1.34    6.78
   1  25  18    4.11    7.37
  -1  25  18    2.77    9.56
   1  25  18   -3.65    7.72
  -1  25  19   -4.72    8.63
  -1  25  19   13.05   11.98
   1  25  19    9.11    8.90
   1  25  19   16.69    8.80
  -1  25  20    1.25    7.12
   1  25  20    0.76    9.07
  -1  25  20   -1.80    9.63
   1  25  20   -1.41    8.32
  -1  25  21   -3.25   10.27
   1  25  21   12.17   11.24
   1  25  21    9.67    8.47
  -1  25  21    3.92   10.24
   1  25  22   -3.58    8.06
  -1  25  22   -0.08    7.29
   1  25  22  -12.14   10.64
  -1  25  23   -1.67   10.74
   1  25  23   18.37   12.40
   1  25  23   22.97   13.65
  -1  25  23   10.01    8.64
   1  25  24   27.30   11.58
  -1  25  24   34.99   15.46
  -1  25  25   16.27   15.76
  -1  26  -5   16.77    8.61
  -1  26  -4   24.47    9.35
  -1  26  -3   15.79    8.04
   1  26  -2   82.32   15.06
  -1  26  -2   75.46   14.69
  -1  26  -2   84.58   14.12
   1  26  -1   11.96    7.78
  -1  26  -1  -10.39    7.69
  -1  26  -1   14.17    7.93
   1  26   0   52.25   11.73
  -1  26   0   55.72   11.95
  -1  26   0   65.85   13.30
   1  26   1   -3.09    6.90
  -1  26   1   -2.18    5.85
  -1  26   2   50.99   11.39
  -1  26   2   68.36   15.19
   1  26   2   67.88   12.80
  -1  26   3    7.62    8.58
   1  26   3   14.64    8.62
  -1  26   3   12.92    7.34
   1  26   3   13.30    8.49
  -1  26   4   54.19   13.71
   1  26   4   39.24   12.62
   1  26   4   22.22    9.20
  -1  26   4   39.08    9.90
  -1  26   5    5.13    6.77
   1  26   5   16.30    7.75
  -1  26   5   12.23    7.46
   1  26   5    9.21    8.93
  -1  26   6    7.79    9.08
   1  26   6   19.81    9.41
   1  26   6   25.99    9.84
  -1  26   6    7.12    7.11
   1  26   7    7.43    9.03
  -1  26   7    5.10    8.23
  -1  26   7   10.85    6.52
   1  26   7    3.23    6.72
   1  26   8   12.00    7.81
   1  26   8   24.28    9.74
  -1  26   8   19.39   12.18
  -1  26   8    9.99    7.04
   1  26   9    0.80    6.62
   1  26   9  -17.34    8.82
  -1  26   9   -2.01    7.93
  -1  26   9    8.15    9.28
  -1  26  10   44.47   13.29
   1  26  10   71.32   14.52
  -1  26  10   64.67   12.55
   1  26  10   71.12   13.94
   1  26  11   11.35    7.24
   1  26  11   -5.05    7.91
  -1  26  11   22.09    9.94
  -1  26  11   18.38   11.98
   1  26  12   27.24   10.92
   1  26  12    7.17    7.85
  -1  26  12   37.41   12.82
  -1  26  12   25.05    9.55
   1  26  13    2.11    8.97
  -1  26  13    1.09    8.17
  -1  26  13    1.28    6.62
   1  26  13    2.62    7.95
  -1  26  14   21.88   12.05
   1  26  14   32.12   10.04
  -1  26  14   29.00   10.08
   1  26  14   12.06    7.96
   1  26  15   -2.96    9.07
  -1  26  15    9.55   10.39
   1  26  15    0.39    6.76
  -1  26  15   20.49    9.03
  -1  26  16   15.28   10.36
   1  26  16    4.63    6.61
  -1  26  16    6.11    7.21
  -1  26  17    6.07    7.70
  -1  26  17   16.74   11.32
   1  26  17   -5.98    8.48
   1  26  17    0.76    8.36
   1  26  18   28.57   10.62
   1  26  18  -11.69   11.22
  -1  26  18    6.13    8.86
  -1  26  18   21.10   12.70
   1  26  19    5.08    8.30
   1  26  19    5.12    7.14
  -1  26  19    2.00    7.14
  -1  26  19    7.81   12.62
   1  26  20   -5.03    8.47
   1  26  20   -0.49    7.48
  -1  26  20    5.40   10.16
  -1  26  20   -1.82    8.31
  -1  26  21   13.33   11.96
   1  26  21   15.37   14.49
   1  26  21   24.30   12.24
  -1  26  21   -7.87   10.41
  -1  26  22   -0.93    9.13
   1  26  22   -1.01    9.89
   1  26  22   16.88   10.50
  -1  26  22    2.02   11.77
  -1  26  23   12.04   11.70
  -1  26  24   16.63   13.15
  -1  27  -5    2.89    7.07
  -1  27  -4   15.94    9.01
  -1  27  -3   38.24   12.10
  -1  27  -2   -4.73    8.91
  -1  27  -2    6.38    7.32
  -1  27  -1    3.61    9.56
  -1  27  -1   -0.11    7.29
   1  27  -1    9.84    7.78
   1  27   0    2.68    6.11
  -1  27   0    0.10    6.23
  -1  27   1   10.08    8.95
   1  27   1   19.21    8.76
  -1  27   1   27.86   10.73
  -1  27   2    2.08    8.25
  -1  27   2    6.25    6.98
   1  27   2    6.02    7.34
  -1  27   3   15.04    6.81
  -1  27   3   20.79   10.27
   1  27   3   36.83   11.60
  -1  27   4   44.35   10.97
  -1  27   4   38.48   12.83
   1  27   4   26.27    9.91
   1  27   4   10.82    7.89
   1  27   5    9.38    6.49
   1  27   5   -1.44    8.45
  -1  27   5    2.51    8.00
  -1  27   5   12.68    7.93
  -1  27   6    0.63    7.37
   1  27   6   -0.13    6.97
  -1  27   6   12.16    6.68
   1  27   7   40.53   10.84
   1  27   7   42.13   11.75
  -1  27   7   52.86   11.49
  -1  27   7   66.21   14.48
  -1  27   8   31.30   13.41
  -1  27   8   40.49   12.26
   1  27   8   15.90   10.27
   1  27   8   25.58    9.75
  -1  27   9   47.89   14.85
   1  27   9   47.43   12.27
   1  27   9   50.28   12.40
  -1  27   9   27.05   10.78
   1  27  10    8.41    6.59
  -1  27  10    4.04    6.47
   1  27  10    8.27    8.17
  -1  27  10   24.34   12.28
   1  27  11   18.80    9.47
   1  27  11   23.29    9.81
  -1  27  11    0.69    7.94
  -1  27  11   14.47    9.66
   1  27  12   49.52   14.49
  -1  27  12   23.80    9.68
  -1  27  12   21.02   10.26
  -1  27  13   -6.00    8.55
   1  27  13   -0.86    6.69
  -1  27  13   -9.16   10.72
   1  27  13   12.07   10.58
  -1  27  14   -6.89    9.29
   1  27  14    8.93    8.48
   1  27  14   -2.34    6.90
  -1  27  14   -6.48    7.52
  -1  27  15   16.87   12.92
   1  27  15   27.09   11.70
   1  27  15   32.82   10.51
  -1  27  15   32.80   11.50
  -1  27  16    9.22   12.42
   1  27  16   19.21   10.15
   1  27  16    6.30    8.64
  -1  27  16    4.44    7.45
   1  27  17   17.42   11.96
  -1  27  17   10.51    8.69
  -1  27  17   32.45   14.41
   1  27  17    0.77    7.27
  -1  27  18   26.24   14.32
  -1  27  18   13.12    9.96
   1  27  18   12.29    9.90
   1  27  18   26.98   13.65
  -1  27  19    1.83    9.88
   1  27  19   -5.01    8.33
  -1  27  19   -0.04    9.31
  -1  27  20   16.14   11.43
  -1  27  20   23.55   11.64
   1  27  20   17.79   12.30
   1  27  20    7.19   10.19
  -1  27  21   16.48   13.37
   1  27  21   -2.86   10.11
   1  27  21    6.14   11.12
  -1  27  22   13.48   11.98
   1  27  22   17.57   11.82
  -1  27  23    3.07   11.08
  -1  28  -5   26.59    9.62
  -1  28  -4    5.89    6.60
  -1  28  -3    2.24    9.65
  -1  28  -2   63.21   15.21
  -1  28  -1    7.61    7.80
  -1  28  -1    5.46    7.99
   1  28  -1   19.80    8.47
  -1  28   0  101.46   17.79
   1  28   0   84.34   14.65
  -1  28   0  108.19   17.25
  -1  28   1   -0.81    7.31
  -1  28   1   16.38    9.05
   1  28   1   -7.52    8.72
  -1  28   2   64.42   14.69
  -1  28   2   65.27   13.84
   1  28   2   74.50   14.48
  -1  28   3    1.30    7.96
   1  28   3    2.73    8.29
  -1  28   3    5.95    7.68
  -1  28   4   17.88    9.40
  -1  28   4    8.03    8.86
   1  28   4    1.38    7.06
  -1  28   5   24.77    9.88
   1  28   5   12.04    7.35
  -1  28   5   41.88   13.33
   1  28   5   24.72    9.52
   1  28   6   12.66    9.38
   1  28   6   24.62    9.85
  -1  28   6   53.67   12.40
  -1  28   6   46.06   14.07
  -1  28   7   10.30    9.66
   1  28   7   -3.92    7.23
  -1  28   7   27.65   10.82
   1  28   7   12.98    9.33
  -1  28   8   16.20   11.39
  -1  28   8   30.83   11.31
   1  28   8    6.43    8.07
   1  28   8   -7.33    8.56
  -1  28   9   23.86    9.60
   1  28   9    7.65    9.59
   1  28   9   -6.38    7.39
  -1  28   9    7.39    8.39
   1  28  10   -2.94    8.99
  -1  28  10   -3.69    8.76
   1  28  10   -5.85    7.82
  -1  28  10  -14.09   11.04
  -1  28  11   10.00    8.78
   1  28  11   34.42   11.60
   1  28  11   40.08   11.88
  -1  28  11   17.73    8.08
  -1  28  12   37.56   13.99
   1  28  12   72.85   16.22
   1  28  12   60.90   14.05
  -1  28  12   47.51   13.12
  -1  28  13    2.51    7.52
   1  28  13   -3.98    9.23
  -1  28  13    1.47   11.86
   1  28  13    3.79    8.33
  -1  28  14   22.37   11.92
   1  28  14   10.08   10.35
   1  28  14    2.62    8.81
  -1  28  14   12.95    9.27
  -1  28  15   12.14   12.11
   1  28  15    4.74    8.54
  -1  28  15   19.93   10.12
   1  28  15    9.37    8.53
   1  28  16   28.60   13.35
  -1  28  16   13.28   12.39
  -1  28  16   14.68   10.05
   1  28  16   38.43   13.05
   1  28  17   30.56   12.86
  -1  28  17    7.55   12.13
   1  28  17   32.20   13.08
  -1  28  17    4.98    8.13
   1  28  18   11.59   10.71
  -1  28  18    3.78   10.98
  -1  28  18   -6.26    8.93
   1  28  18    8.76    8.66
   1  28  19    1.00   10.15
  -1  28  19    0.46   10.44
   1  28  19    4.44    7.71
  -1  28  19    3.03    8.66
   1  28  20   12.82   11.78
  -1  28  20   10.89   13.24
   1  28  21    2.54    9.76
  -1  28  21   22.14   12.73
  -1  29  -4    5.39    7.33
  -1  29  -3   12.39    8.96
  -1  29  -2   18.24    9.29
  -1  29  -1   -2.93    9.34
   1  29  -1    6.79    8.19
  -1  29   0   13.88    9.28
   1  29   0   -0.91    9.09
  -1  29   0   -0.75    6.50
   1  29   1    7.58    7.94
  -1  29   1   17.64    9.69
  -1  29   1    2.52    8.28
  -1  29   2   25.44   12.61
   1  29   2   12.58    8.65
  -1  29   2   11.43    6.63
   1  29   3    7.53    8.11
  -1  29   3   19.23   12.01
  -1  29   3   27.97   11.50
  -1  29   4   13.76    8.37
   1  29   4    2.38    7.69
  -1  29   4    7.02    9.98
  -1  29   5   20.24   11.26
   1  29   5   12.24    8.57
  -1  29   5   10.94    8.78
   1  29   6   28.10   11.62
  -1  29   6   15.77   12.27
  -1  29   6   17.67   10.36
   1  29   6    7.98    6.89
   1  29   7   -0.98    7.57
  -1  29   7    3.73    6.99
  -1  29   7    2.15    8.68
   1  29   7   25.11   11.05
  -1  29   8   40.87   14.39
  -1  29   8   66.31   13.58
   1  29   8   41.37   13.50
   1  29   8   40.33   11.90
  -1  29   9   30.02   13.77
  -1  29   9   26.52    9.13
   1  29   9   22.28   11.81
   1  29   9   33.83   12.21
  -1  29  10   21.53    9.99
   1  29  10   46.55   14.30
   1  29  10   44.85   12.15
  -1  29  10   62.60   14.25
   1  29  11   71.82   16.48
   1  29  11   81.08   16.60
  -1  29  11   58.56   16.14
  -1  29  11   73.27   15.85
  -1  29  12    7.73    8.46
   1  29  12   10.14   10.91
  -1  29  12    6.06    8.30
   1  29  12    5.48    8.45
   1  29  13    9.72   10.86
  -1  29  13    1.35    7.20
  -1  29  13   32.44   13.21
   1  29  13    6.93    7.69
  -1  29  14    2.90    7.99
   1  29  14   19.07   10.67
  -1  29  14    7.18   10.24
   1  29  14   13.69   10.23
  -1  29  15    9.68    9.20
   1  29  15    1.15    8.21
  -1  29  16   12.75   11.58
  -1  29  16    8.95    8.82
   1  29  16    8.67    8.60
   1  29  16    5.49    9.88
  -1  29  17   10.64   14.47
   1  29  17   28.53   12.70
   1  29  17    9.14   11.72
  -1  29  17   28.96   12.23
  -1  29  18   -3.81   11.93
   1  29  18    5.06    9.87
   1  29  19    6.73    9.58
  -1  29  19    3.58   10.74
  -1  29  20    9.98   12.68
   1  29  20    3.89    9.43
  -1  30  -4  -21.75   12.10
  -1  30  -3    7.98    8.04
  -1  30  -2   18.04    9.15
  -1  30  -1   40.37   13.07
  -1  30   0   47.04   13.79
  -1  30   0    3.89    8.47
   1  30   0   34.33   11.27
   1  30   1   29.39   10.14
  -1  30   1   46.93   13.62
  -1  30   1   22.20   11.13
  -1  30   2   27.03   12.14
   1  30   2   20.79    9.70
  -1  30   2   28.26   10.41
  -1  30   3   12.31    8.32
  -1  30   3   19.32   11.83
   1  30   3   10.92    7.12
  -1  30   4   28.52   13.09
  -1  30   4   15.10    9.44
   1  30   4   12.84    9.18
  -1  30   5    9.90    8.10
  -1  30   5   11.79    9.87
   1  30   5   11.28    9.36
  -1  30   6  -14.95   10.87
   1  30   6    6.20   10.19
  -1  30   6   12.34    8.15
   1  30   7   16.60   10.84
   1  30   7   21.49   10.41
  -1  30   7   43.83   17.02
  -1  30   7   42.44   13.12
   1  30   8   -0.76    9.30
   1  30   8    6.45    9.69
  -1  30   8   14.05    9.49
  -1  30   8   -4.37    7.51
  -1  30   9   36.36   13.03
   1  30   9   33.55   12.52
  -1  30   9   62.59   14.85
   1  30   9   35.93   12.44
  -1  30  10   17.02    8.89
   1  30  10   -3.63    8.30
   1  30  10   15.61   10.82
  -1  30  10    4.51    9.75
   1  30  11   19.15   12.03
  -1  30  11    4.79    8.97
   1  30  11    9.08    9.11
  -1  30  11   -4.07   10.08
  -1  30  12    3.37   10.07
   1  30  12   22.64   11.64
   1  30  12   16.22    8.85
  -1  30  12   17.74   10.24
  -1  30  13   -1.56    8.15
   1  30  13    7.28    9.64
   1  30  13   19.38   10.84
  -1  30  13    1.75    9.54
  -1  30  14   -1.02    8.02
   1  30  14   11.70   11.88
   1  30  14   11.64    8.99
  -1  30  14   16.45   12.15
  -1  30  15   -7.63    8.85
   1  30  15   26.68   13.02
   1  30  15   -7.57    9.73
  -1  30  15   -1.41   10.69
   1  30  16    6.72   10.36
  -1  30  16    5.50    9.42
   1  30  17    3.63    9.81
  -1  30  17   19.16   11.54
  -1  30  18  -20.80   14.74
   1  30  18    9.08   12.01
   1  30  19   -5.48   12.99
  -1  31  -3   24.99   11.15
  -1  31  -2    3.13    8.00
  -1  31  -1    3.96    8.00
   1  31   0    7.87    8.33
  -1  31   0   -9.72    7.80
  -1  31   1   14.85   11.81
  -1  31   1    8.57    9.98
   1  31   1   12.55    9.26
  -1  31   2   -1.02    8.49
  -1  31   2    7.29    9.67
   1  31   2   -6.62    7.98
  -1  31   3    4.82    8.16
   1  31   3   10.30    8.58
  -1  31   3   11.42    7.87
  -1  31   4   -4.46    7.21
  -1  31   4   -3.19    9.28
   1  31   4   -7.17    6.89
   1  31   5   12.54    8.45
  -1  31   5    1.77    8.85
  -1  31   5    6.46   11.35
   1  31   6    4.64    9.51
  -1  31   6   12.02    9.95
  -1  31   6   11.27    9.20
  -1  31   7   10.33    9.60
   1  31   7    0.98    8.17
  -1  31   7   -2.36    7.97
   1  31   8  -13.04    8.97
   1  31   8    0.52    8.37
  -1  31   8   -5.30    7.60
  -1  31   9    4.23    9.32
  -1  31   9   -5.68   11.25
   1  31   9    7.57   10.66
   1  31   9    2.99    8.18
  -1  31  10    2.71    8.41
   1  31  10    5.21    8.41
   1  31  10   11.88   11.20
  -1  31  10  -15.19    8.55
  -1  31  11   12.17   10.56
   1  31  11   10.81   11.05
   1  31  11   13.63    8.43
  -1  31  11   21.36   12.29
  -1  31  12   14.76   12.32
   1  31  12   26.35   12.21
  -1  31  12   16.73    9.91
   1  31  12   30.01   14.20
  -1  31  13    7.34    8.68
   1  31  13   -5.66   10.86
  -1  31  13    2.58    9.19
  -1  31  14    6.40   10.35
   1  31  14   -8.73   11.21
  -1  31  15   32.01   13.66
   1  31  15   28.55   13.86
   1  31  16   11.77   10.56
  -1  31  16   13.40   12.46
   1  31  17    7.69   11.01
   1  31  18    9.50    9.98
  -1  32  -3    5.34    8.81
  -1  32  -2  -10.63    8.22
  -1  32  -1    6.51    9.50
  -1  32   0   -1.73    8.38
   1  32   1   14.62    9.96
  -1  32   1   -5.29    9.64
  -1  32   2    8.33   11.27
  -1  32   2    8.29    8.10
   1  32   2  -20.70    9.96
  -1  32   3    1.08    8.27
   1  32   3   -1.91    8.89
  -1  32   3    5.31    8.16
   1  32   4   11.21    8.09
  -1  32   4    4.36    7.88
  -1  32   4  -16.04   10.94
  -1  32   5   -5.47    8.91
  -1  32   5   -5.56    9.71
   1  32   5   -9.73    9.36
   1  32   6   16.31   11.21
  -1  32   6   28.71   12.88
  -1  32   6   32.42   14.32
  -1  32   7   21.56   10.92
   1  32   7   -3.56   11.01
  -1  32   7   -1.64    8.22
  -1  32   8    4.94    9.41
  -1  32   8   18.97   11.05
   1  32   8   -2.26    8.66
  -1  32   9   13.15   11.23
  -1  32   9  -13.15   10.88
   1  32   9   -1.90    7.40
   1  32   9   18.74   10.97
  -1  32  10    6.26    9.42
   1  32  10   -6.75    9.42
   1  32  10   -2.39    9.03
  -1  32  10    5.36    8.26
  -1  32  11    3.99    7.90
  -1  32  11    7.54    9.14
   1  32  11    1.29    8.08
   1  32  11   15.43   11.29
  -1  32  12   18.49   11.37
   1  32  12   14.09   10.75
   1  32  13    0.66    9.10
  -1  32  13  -10.89   12.86
  -1  32  14   17.92   11.11
   1  32  14   18.01   12.58
   1  32  15   22.44   13.27
   1  32  16    5.66   10.57
   1  32  17    9.09   10.70
  -1  33  -2    3.38    8.26
  -1  33  -1    8.27    8.09
  -1  33   0   14.91    7.65
  -1  33   1    3.43    8.99
   1  33   2    5.92    7.45
  -1  33   2   25.08   13.07
  -1  33   3    1.43    8.34
   1  33   3   -3.46    7.95
  -1  33   4    7.64    9.42
   1  33   4    4.38    7.67
  -1  33   4    0.49    7.99
   1  33   5   -7.49    8.53
  -1  33   5   -3.07    8.00
  -1  33   5   -9.06    9.84
  -1  33   6   19.24   10.76
   1  33   6   -7.96    9.42
  -1  33   6   16.10   10.82
   1  33   7   -2.32    9.19
  -1  33   7    9.90   10.53
  -1  33   7   11.26   10.11
  -1  33   8   12.83   11.54
   1  33   8   10.20    9.77
  -1  33   8    1.41    9.06
   1  33   9   13.73   11.36
  -1  33   9   16.59   11.76
   1  33  10   -2.09    9.25
  -1  33  10   13.38   11.58
   1  33  11   12.81   10.76
  -1  33  11   -0.36    9.45
   1  33  12   19.06   11.60
   1  33  13    4.02    9.19
   1  33  14   82.19   20.26
  -1  34  -2    5.54    9.30
  -1  34  -1   13.34    9.27
  -1  34   0  -14.70   10.42
  -1  34   1   27.69   13.21
   1  34   2    2.55    8.09
  -1  34   2   45.40   15.56
  -1  34   3    3.35   10.04
   1  34   3    5.00   10.25
   1  34   4    1.62   10.72
  -1  34   4   -0.15   10.21
  -1  34   4    8.70    9.68
   1  34   5    7.16    7.85
  -1  34   5  -19.08   13.92
  -1  34   5   -4.69   10.50
   1  34   6   -9.66   10.27
   1  34   7   17.80   12.10
   1  34   8   13.13   10.60
   1  34   9   12.42   11.70
   1  34  10   34.17   14.33
   1  34  11   12.21    9.91
  -2   0 -20   64.44   13.07
  -2   0 -19    2.76    7.67
  -2   0 -18   61.26   11.21
  -2   0 -17    4.50    5.64
  -2   0 -16   89.27   11.10
  -2   0 -15    6.06    6.17
  -2   0 -14  221.92   15.96
  -2   0 -13    1.15    4.46
   2   0 -12   86.79   16.05
  -2   0 -12   80.05    8.43
  -2   0 -11   12.92    4.30
   2   0 -11    4.56    8.50
  -2   0 -10   44.46    5.39
   2   0 -10   22.10    9.90
  -2   0  -9    2.17    2.31
   2   0  -9    2.70    9.03
  -2   0  -8 1223.60   18.94
   2   0  -8 1451.01   51.94
  -2   0  -7   12.28    2.03
   2   0  -7   22.36    9.76
  -2   0  -6 2563.11   20.76
   2   0  -6 2688.93   64.83
   2   0  -5    0.46    6.59
  -2   0  -5    5.49    1.88
   2   0  -4  402.11   23.76
   2   0  -3   83.40   15.39
   2   0  -2  907.03   32.80
   2   0  -1   28.07    9.36
  -2   0  -1   26.66    5.71
  -2   0  -1   14.79    2.71
  -2   0   0 4303.79   40.22
  -2   0   0 4493.42   64.32
  -2   0   1   28.70    8.92
  -2   0   2  828.47   30.37
  -2   0   3   95.58   13.03
  -2   0   4  305.14   21.10
  -2   0   5   21.75    9.92
   2   0   5    7.83    1.84
  -2   0   6 2613.77   62.05
  -2   0   7   15.46    8.42
  -2   0   8 1316.87   46.56
   2   0   8 1215.34   15.94
   2   0   9    0.08    1.42
  -2   0   9    7.48    6.85
   2   0  10   54.30    3.82
  -2   0  10   49.76   11.31
  -2   0  11    2.91    7.71
   2   0  11    9.11    2.62
   2   0  12   98.35    5.81
  -2   0  12   75.24   13.68
   2   0  13    3.52    2.27
  -2   0  13   -8.81    8.29
   2   0  14  266.07   10.25
  -2   0  14  251.63   24.88
   2   0  15   -1.14    2.74
  -2   0  15   -5.55    7.91
  -2   0  16   56.22   12.77
   2   0  16  115.84    7.86
  -2   0  17    7.68    9.58
   2   0  17    1.63    2.50
   2   0  18   64.28    6.76
  -2   0  18   50.02   14.45
  -2   0  19   -2.06    8.37
   2   0  19   -2.29    2.77
  -2   0  20  124.96   20.19
   2   0  20   67.21    6.86
   2   0  21    0.89    3.25
  -2   0  21    6.53   10.37
  -2   0  22   22.58   11.92
   2   0  22    6.11    3.66
   2   0  23    4.59    3.73
  -2   0  23   12.34   12.06
   2   0  24   11.97    4.46
  -2   0  24    5.72   11.14
  -2   0  25   18.39   10.80
  -2   0  26   47.55   16.14
  -2   0  27   18.37   16.04
  -2   0  28    7.00   10.56
   2   0  28   18.77   11.26
  -2   0  29    9.39    9.65
  -2   0  29    0.09   11.35
   2   0  29    8.23   11.62
   2   0  30   87.13   19.88
  -2   0  30  160.80   27.15
  -2   0  31    9.98   13.43
  -2   0  32   10.48   16.13
  -2   0  33   37.63   20.15
  -2   0  34   20.53   14.04
  -2  -1 -20   28.55    9.43
  -2   1 -20   12.01   10.13
  -2   1 -19    3.24    6.81
  -2  -1 -19    4.32    7.32
  -2   1 -18   96.66   13.35
  -2  -1 -18   68.53   11.92
  -2  -1 -17   73.75   11.79
  -2   1 -17   76.86   11.50
  -2  -1 -16   69.70   11.29
  -2   1 -16   83.22   11.38
  -2   1 -15   48.11    8.75
  -2  -1 -15   54.79    9.21
  -2   1 -14  334.96   18.48
  -2  -1 -14  312.24   18.86
  -2   1 -13    9.32    4.53
  -2  -1 -13   13.95    5.54
  -2   1 -12  613.88   20.91
   2  -1 -12  586.86   38.45
   2   1 -12  533.64   37.19
  -2  -1 -11   35.23    6.03
   2  -1 -11   22.90   11.46
  -2   1 -11   24.08    5.09
   2   1 -11   21.60   10.22
   2  -1 -10   33.47   10.42
   2   1 -10   32.23   10.90
  -2  -1 -10   42.27    5.54
  -2   1 -10   37.42    5.09
  -2   1  -9  188.50    8.54
  -2  -1  -9  235.58   10.48
   2   1  -9  237.53   24.02
   2  -1  -9  191.43   20.40
  -2   1  -8  278.82    8.99
   2  -1  -8  362.78   26.65
   2   1  -8  318.29   26.64
  -2  -1  -8  323.51   10.54
   2   1  -7    0.48    8.17
  -2  -1  -7    7.57    1.95
   2  -1  -7   -9.34    8.05
  -2  -1  -6  487.74   10.71
   2   1  -6  429.85   28.99
  -2  -1  -5   11.08    2.26
   2   1  -5   15.17    9.50
   2  -1  -5   12.94    8.19
  -2  -1  -4    6.74    2.31
   2   1  -4   -1.15    7.18
   2  -1  -4   -0.11    6.19
  -2   1  -3 3800.59   26.75
  -2   1  -3 3825.56   45.81
  -2   1  -2 2491.76   39.38
  -2   1  -2 2418.31   26.04
  -2   1  -1    9.98    3.01
   2  -1  -1    7.48    6.55
  -2   1  -1   11.44    5.24
   2  -1   0   97.37   10.77
  -2   1   0   87.64    6.94
  -2   1   0   94.43    9.61
   2  -1   0   91.61    7.12
  -2  -1   1   14.48    7.15
   2  -1   1   14.42    3.45
   2  -1   1   19.46    5.87
  -2   1   1   29.71    8.15
  -2   1   1   19.91    4.96
   2  -1   2 2316.14   25.82
  -2   1   2 2195.28   37.27
  -2  -1   3 3810.81   68.51
   2  -1   3 3997.69   30.98
  -2   1   4    4.15    6.10
   2  -1   4    3.40    1.87
  -2  -1   5   18.39    8.28
  -2   1   5   30.88    9.51
   2  -1   5   11.67    2.41
  -2   1   6  405.84   25.20
  -2  -1   6  353.18   24.59
   2   1   7    9.18    2.42
  -2   1   7    0.25    6.79
  -2  -1   7   11.85    7.81
  -2   1   8  333.22   23.59
  -2  -1   8  330.72   25.66
   2   1   8  272.91    8.83
   2   1   9  243.36    8.31
  -2   1   9  193.23   19.00
   2  -1   9  195.65    5.88
  -2  -1   9  213.66   21.32
   2   1  10   47.79    4.12
  -2  -1  10   58.78   13.26
  -2   1  10   45.76   11.90
   2  -1  10   40.41    3.00
   2  -1  11   32.27    3.02
   2   1  11   27.43    3.69
  -2  -1  11   41.52   12.10
  -2   1  11   35.78   11.83
  -2   1  12  585.08   34.33
   2  -1  12  775.68   14.00
   2   1  12  859.50   17.76
  -2  -1  12  620.93   36.93
   2   1  13   10.05    2.72
  -2  -1  13   10.88    8.97
   2  -1  13   13.17    2.39
  -2   1  13   24.22   11.26
   2  -1  14  386.82   11.57
   2   1  14  404.52   13.56
  -2   1  14  223.10   22.53
  -2  -1  14  270.78   26.00
   2   1  15   60.14    5.83
  -2  -1  15   69.99   15.87
  -2   1  15   45.46   11.91
   2  -1  15   56.38    4.85
   2  -1  16   86.44    6.52
  -2   1  16   66.42   14.16
   2   1  16   86.33    7.21
   2  -1  17   65.50    5.89
  -2   1  17   96.67   17.03
  -2  -1  17   78.50   15.67
   2   1  17   61.43    6.89
   2  -1  18   80.67    6.87
   2   1  18   70.74    7.36
   2   1  19    4.79    3.48
  -2  -1  19    2.19    9.91
   2  -1  19    2.71    2.77
  -2   1  19   10.07    8.54
  -2  -1  20   40.69   14.80
  -2   1  20   41.12   13.74
   2  -1  20   21.86    4.38
   2   1  20   17.11    4.52
  -2  -1  21  288.00   30.98
  -2   1  21  285.68   29.80
   2   1  21  182.35   12.03
   2  -1  21  189.38   11.26
  -2  -1  22   68.63   17.55
   2  -1  22   68.97    7.64
   2   1  22   75.16    8.16
  -2   1  22   66.62   16.03
   2  -1  23   11.49    3.38
   2   1  23    7.69    3.88
  -2   1  23   18.38   10.76
  -2  -1  23   21.67   11.39
  -2  -1  24  103.94   20.88
   2   1  24   66.77    7.90
  -2   1  24   90.41   16.03
  -2  -1  25   -9.00   12.76
  -2   1  25   -6.64   11.63
   2   1  25    6.41    7.60
  -2   1  26   57.51   16.39
  -2   1  26   74.06   17.51
  -2  -1  26   59.63   15.63
   2   1  26   57.82   13.19
  -2   1  27  111.41   20.47
  -2   1  27   85.79   19.55
  -2  -1  27   73.79   18.45
   2   1  27   95.43   18.39
   2   1  28    5.18   10.07
  -2   1  28    5.26   12.04
  -2  -1  28    8.46   10.34
  -2   1  28    6.78   11.17
  -2   1  29   56.26   17.43
  -2   1  29   71.78   17.65
  -2  -1  29   72.59   18.08
   2   1  29   89.84   19.75
   2   1  30    8.80   12.00
   2  -1  30   10.07   10.89
  -2   1  30    9.73   12.64
  -2   1  30   34.67   14.30
  -2   1  31  -13.24   13.48
  -2  -1  31   -4.94   12.01
  -2  -1  32    4.47   11.98
  -2   1  32   28.56   16.82
  -2  -1  33   23.06   15.12
  -2   1  33   31.64   20.08
  -2  -1  34    9.41   12.24
  -2   1  34   13.33   13.78
  -2  -2 -20    5.76    8.22
  -2  -2 -19   51.51   11.43
  -2   2 -19   55.31   10.06
  -2   2 -18   46.13    9.17
  -2  -2 -18   29.08    9.64
  -2  -2 -17    1.61    5.82
  -2   2 -17    7.16    5.89
  -2   2 -16   51.10    9.31
  -2  -2 -16  134.35   13.91
  -2   2 -15   24.56    6.17
  -2  -2 -15   37.50    8.43
  -2  -2 -14   71.30    9.89
  -2   2 -14   67.08    8.41
  -2  -2 -13   19.07    6.39
   2   2 -13    8.19   10.31
  -2   2 -13   15.31    5.01
   2   2 -12  631.71   41.07
  -2  -2 -12  660.86   24.55
   2  -2 -11  178.94   22.25
   2   2 -11  179.91   22.53
  -2  -2 -11  163.68   11.28
  -2   2 -11  134.40    8.32
   2  -2 -10   16.00   10.58
   2   2 -10   29.88   11.10
  -2  -2 -10   32.47    5.06
   2   2  -9  438.31   32.77
   2  -2  -9  408.13   30.81
   2  -2  -8   33.29   11.18
  -2  -2  -8   18.13    3.59
   2  -2  -7  484.86   29.50
   2   2  -7  525.32   32.79
  -2  -2  -7  435.52   12.38
  -2  -2  -6  916.36   16.45
   2  -2  -6 1244.95   43.41
  -2  -2  -5  748.68   14.49
   2  -2  -5  940.64   35.53
  -2  -2  -4   59.10    4.69
   2  -2  -4   71.53   11.30
  -2   2  -4   56.75    4.39
  -2   2  -3   27.01    3.73
  -2   2  -3   36.36    5.01
  -2   2  -2 1872.49   25.31
   2  -2  -2 1844.59   44.84
   2  -2  -1   61.90    9.29
  -2   2  -1   59.69    7.20
  -2   2  -1   51.79    5.79
   2  -2  -1   61.20    7.19
   2  -2   0  896.20   21.46
  -2   2   0  904.92   21.53
  -2   2   0  954.31   27.00
  -2   2   1   62.62    9.03
  -2   2   1   62.12    6.74
   2  -2   1   65.17    8.47
   2  -2   1   44.30    5.56
  -2   2   2 2088.88   45.64
   2  -2   2 2184.69   38.23
  -2   2   2 2140.75   38.66
   2  -2   2 2037.76   28.30
  -2   2   3   35.93    7.85
  -2   2   3   59.68    8.31
   2  -2   3   28.99    4.50
  -2  -2   3   53.11    9.53
   2  -2   3   29.25    5.27
   2  -2   4   57.53    4.96
  -2   2   4   65.63   10.79
  -2  -2   4   55.91   11.19
  -2   2   4   47.96    8.14
  -2   2   5  681.85   26.87
   2  -2   5  743.05   15.27
  -2  -2   5  726.10   33.78
  -2   2   5  710.23   29.51
   2   2   6  911.34   17.05
  -2  -2   6 1114.17   41.88
  -2   2   6 1151.29   35.16
  -2   2   6 1164.25   40.70
   2   2   6  906.79   18.11
   2  -2   6  870.80   17.67
   2   2   7  454.93   12.17
  -2   2   7  444.48   26.79
  -2  -2   7  443.73   28.52
   2   2   7  460.18   13.78
   2  -2   7  469.55   13.15
  -2   2   8   19.72    8.95
  -2  -2   8   24.94   11.07
   2   2   8   20.04    3.20
  -2   2   9  442.19   27.51
  -2  -2   9  466.11   30.01
  -2   2  10   37.21   11.25
   2   2  10   34.32    4.13
  -2  -2  10   21.66   11.73
  -2   2  11  201.94   19.68
   2  -2  11  105.79    4.41
  -2  -2  11  174.37   20.40
   2   2  11  123.83    7.28
  -2   2  12  593.43   34.52
   2  -2  12  516.31   10.06
   2   2  12  596.01   16.36
  -2  -2  12  629.68   37.14
  -2  -2  13   12.02    8.65
   2  -2  13   12.37    2.09
  -2   2  13   14.74    8.28
   2   2  13   12.12    3.37
   2   2  14   59.13    5.75
  -2  -2  14   57.49   12.93
   2  -2  14   62.79    4.41
  -2   2  14   73.62   13.91
  -2  -2  15   16.86   10.86
  -2   2  15   10.60    9.05
   2  -2  15   25.58    3.32
   2   2  15   24.70    4.24
  -2   2  16   36.40   11.34
   2   2  16   64.02    6.57
   2  -2  16   58.46    5.04
  -2  -2  16   50.21   13.60
  -2  -2  17    4.53    9.46
   2  -2  17    0.94    2.20
   2   2  17    6.83    3.42
   2   2  18   32.67    5.29
  -2  -2  18   51.16   15.67
   2  -2  18   38.34    5.14
  -2   2  18   58.23   15.15
  -2   2  19   66.15   16.51
  -2  -2  19   49.17   13.09
   2  -2  19   65.35    6.44
   2   2  19   76.47    7.72
   2  -2  20    6.83    3.17
  -2  -2  20   22.72   13.42
  -2   2  20   27.09   11.10
   2   2  20    5.64    3.83
  -2   2  21   80.85   17.31
   2   2  21   59.26    7.48
   2  -2  21   64.46    6.43
  -2  -2  21   88.97   17.78
  -2  -2  22   96.27   18.84
   2  -2  22   75.87    7.06
   2   2  22   89.58    9.80
   2   2  22   42.79   11.13
  -2   2  22   84.98   16.55
   2  -2  23   33.66    5.40
  -2  -2  23   44.79   16.12
   2   2  23   20.03    9.40
  -2   2  23   25.09   10.73
   2   2  23   33.43    6.69
  -2   2  23   33.94   13.94
  -2   2  24  101.59   19.05
   2   2  24   73.00   14.27
  -2   2  24  147.05   20.95
  -2  -2  24  162.11   25.16
   2   2  24   78.93    9.12
  -2  -2  25  -20.01   14.60
   2   2  25    9.43    8.96
  -2   2  25   16.14   11.25
  -2   2  25    5.32    9.62
   2   2  25    0.67    4.23
  -2   2  26   11.24   11.21
  -2   2  26    1.29    9.48
  -2  -2  26    2.79   10.36
   2   2  26    8.75    8.90
  -2   2  27   19.15   14.12
  -2  -2  27    5.00   11.84
   2   2  27   20.50   12.22
  -2   2  27   27.48   12.49
  -2   2  28  -16.73   11.77
  -2   2  28   -8.18    9.45
   2   2  28   -7.18    8.95
  -2  -2  28   -8.37    9.95
  -2   2  29   24.12   11.37
   2   2  29  -12.30   12.01
  -2  -2  29   13.50   13.58
  -2   2  29    7.80   10.62
   2   2  30   13.00   12.49
  -2   2  30   31.83   16.35
  -2   2  30  -17.07   12.89
  -2   2  31   -1.87   13.75
  -2   2  32   17.53   16.68
  -2  -2  33  -22.63   16.05
  -2   2  33   -1.38   12.61
  -2   2  34   18.15   17.31
  -2  -2  34    9.93   12.51
  -2  -3 -19  120.32   17.08
  -2  -3 -18   23.64    9.72
  -2  -3 -17   -4.25    5.50
  -2  -3 -16   67.90   11.35
  -2  -3 -15  770.95   32.93
  -2  -3 -14    6.86    5.74
  -2  -3 -13   94.08   10.77
  -2  -3 -12   15.81    5.20
  -2  -3 -11  209.05   13.43
   2  -3 -11  258.74   25.09
   2  -3 -10   19.58    8.94
  -2  -3 -10   48.15    6.45
  -2  -3  -9   91.35    7.38
   2  -3  -9  108.52   15.37
  -2  -3  -8  151.32    8.33
   2  -3  -8  113.35   16.73
  -2  -3  -7  218.95    9.59
   2  -3  -7  185.39   19.14
  -2  -3  -6   58.95    5.10
   2  -3  -6   81.52   14.12
   2  -3  -5 1200.40   41.18
  -2  -3  -5 1314.84   21.34
   2  -3  -4   12.41    5.94
  -2  -3  -4   22.13    3.30
  -2   3  -4   20.24    3.20
  -2   3  -4   20.30    3.37
   2  -3  -4   21.26    6.22
   2  -3  -3   43.37    7.50
  -2  -3  -3   31.18    3.84
  -2   3  -3   28.51    4.25
  -2   3  -3   33.85    4.08
   2  -3  -3   46.40    9.68
   2  -3  -2  230.15   14.16
  -2   3  -2  198.37    9.74
   2  -3  -2  205.49   15.26
  -2   3  -2  217.07   10.65
  -2  -3  -2  221.15    6.19
  -2   3  -1 4325.06   50.27
  -2   3  -1 4167.11   45.13
   2  -3  -1 4268.25   53.40
  -2   3   0    7.13    4.40
   2  -3   0    5.34    4.28
  -2   3   0    3.77    4.08
   2  -3   0   -0.97    4.62
   2  -3   1 4242.90   49.25
   2  -3   1 4294.08   54.66
  -2   3   2  232.31   15.25
  -2   3   2  218.28   13.26
   2  -3   2  221.59   10.57
   2  -3   2  187.46   10.91
  -2   3   3   46.17    7.77
  -2   3   3   34.55    6.75
   2  -3   3   24.68    4.66
   2  -3   3   33.10    5.39
  -2   3   4   15.11    6.05
  -2   3   4   17.47    7.58
   2  -3   4   22.82    3.92
   2  -3   4   19.21    3.78
   2   3   5 1293.55   17.50
  -2   3   5 1260.36   38.73
  -2   3   5 1219.47   37.79
  -2  -3   6   54.53   13.03
  -2   3   6   62.42   10.81
  -2   3   6   53.82    9.75
   2   3   6   43.67    4.88
   2   3   6   57.72    5.80
   2  -3   6   48.60    5.33
  -2   3   7  179.75   17.39
  -2   3   7  207.47   16.71
   2  -3   7  219.03   10.15
   2   3   7  193.79    8.95
  -2  -3   7  191.39   19.93
   2   3   7  197.37    9.40
   2   3   8  147.69    7.76
   2  -3   8  162.98    8.80
  -2  -3   8  108.69   16.77
   2   3   8  139.37    9.45
  -2   3   8  112.32   13.80
  -2   3   8   90.97   13.87
  -2   3   9  121.50   15.63
   2   3   9   75.56    5.85
   2   3   9   99.53    8.92
  -2  -3   9  117.77   15.91
  -2   3   9  127.37   14.78
  -2  -3  10   39.68   11.50
   2   3  10   44.79    6.58
   2   3  10   43.03    4.77
  -2   3  10   35.43   10.44
  -2   3  10   31.65    9.67
   2   3  11  225.04   14.37
  -2   3  11  243.66   21.03
  -2  -3  11  245.36   24.05
  -2   3  11  289.20   22.31
  -2   3  12   16.82    8.93
   2   3  12   15.71    3.11
  -2   3  12   30.82   10.85
   2   3  12   14.89    5.76
  -2  -3  12   31.01   12.75
  -2   3  13   97.73   14.08
   2  -3  13   66.16    3.65
   2   3  13   84.75    6.91
  -2   3  13  101.09   14.35
  -2  -3  13  109.81   16.97
   2   3  13   73.63    9.95
   2   3  14   -1.11    4.19
  -2   3  14   11.37    7.99
   2  -3  14    4.45    1.75
  -2  -3  14   -2.18    9.41
   2   3  14    2.99    2.65
  -2   3  14   10.41    6.73
   2   3  15  747.92   21.62
   2  -3  15  752.22   14.75
  -2   3  15  837.98   42.76
  -2  -3  15  760.75   44.68
   2   3  15  769.29   31.82
  -2   3  15  805.34   41.02
  -2   3  16   91.30   15.00
   2  -3  16   58.78    4.63
   2   3  16   62.93    6.79
  -2   3  16   78.19   14.51
  -2  -3  16   97.83   17.59
   2   3  16   61.31   10.19
   2  -3  17    3.28    2.12
   2   3  17    6.73    5.60
  -2  -3  17   -6.83   10.99
  -2   3  17    0.25    8.18
  -2   3  17   -1.42    7.14
   2   3  17    6.20    2.99
   2  -3  18   11.97    2.79
  -2  -3  18   17.64    9.80
  -2   3  18   34.39    9.84
  -2   3  18   29.02   11.93
   2   3  18   12.85    4.22
   2   3  18    3.79    5.20
  -2  -3  19  124.45   21.75
   2  -3  19  170.60    9.02
   2   3  19  123.75   17.06
   2   3  19  178.94   12.19
  -2   3  19  123.05   18.68
  -2   3  19  146.33   20.27
   2   3  20  101.50   15.29
   2   3  20  119.82   10.41
   2  -3  20  127.18    8.44
  -2  -3  20  190.74   25.76
  -2   3  20  175.17   21.18
  -2   3  20  148.73   21.03
   2   3  21   24.67    5.53
  -2  -3  21   34.63   13.61
  -2   3  21   38.34   12.81
  -2   3  21   41.57   12.74
   2  -3  21   29.08    4.74
   2   3  21   37.42   10.93
  -2   3  22   40.68   15.54
   2   3  22   29.45    6.01
  -2  -3  22   21.28   13.45
  -2   3  22   42.68   13.05
   2  -3  22   21.55    4.19
   2   3  22   45.48   12.13
  -2   3  23   55.12   15.43
   2   3  23   39.77    7.13
  -2   3  23   43.73   12.01
  -2  -3  23   82.96   18.45
   2   3  23   37.77   11.71
   2   3  24   -2.98    8.58
   2   3  24    4.37    4.31
  -2  -3  24   25.30   13.88
  -2   3  24   24.86   12.42
  -2   3  24   -7.14    9.44
   2   3  25   -1.61    3.98
  -2   3  25   22.51   11.30
  -2  -3  25    3.66   13.28
  -2   3  25  -10.88    9.71
   2   3  25  -14.97    9.28
  -2   3  26   29.19   13.70
  -2   3  26   51.11   17.36
  -2  -3  26   21.54   14.12
   2   3  26    1.06    8.77
  -2  -3  27    7.82   13.42
  -2   3  27   -1.45   10.26
  -2   3  27   17.47   13.74
   2   3  27    5.98    8.33
  -2   3  28    6.20   12.93
  -2  -3  28   21.28   15.43
   2   3  28   -3.81   10.15
  -2   3  28   -0.20   10.89
   2   3  29   36.42   14.59
  -2   3  29   33.17   14.36
  -2  -3  29   31.04   15.21
  -2   3  29   16.55   13.13
  -2   3  30   13.52   14.06
  -2   3  30   38.38   13.76
  -2   3  31   32.03   17.42
  -2   3  32    1.73   11.80
  -2   3  33  -14.77   17.94
  -2  -3  34   12.00   15.46
  -2   3  34   31.43   19.49
  -2  -4 -18   53.30   12.75
  -2  -4 -17  139.84   16.94
  -2  -4 -16    1.10    6.87
  -2  -4 -15   62.59    9.87
  -2  -4 -14   89.68   11.62
  -2  -4 -13   23.25    5.98
  -2  -4 -12   66.93    8.61
  -2  -4 -11  253.60   14.49
  -2  -4 -10    3.65    2.74
   2  -4 -10   -4.20    8.70
   2  -4  -9   29.81    9.54
  -2  -4  -9   41.21    5.43
  -2  -4  -8   47.49    5.64
   2  -4  -8   87.32   14.18
   2  -4  -7  657.86   32.98
  -2  -4  -7  649.11   17.41
  -2  -4  -6  715.12   17.72
  -2  -4  -6  731.44   17.57
   2  -4  -6  669.33   31.90
  -2  -4  -5  135.90    7.89
   2  -4  -5  165.53   16.84
  -2   4  -5  132.63    8.06
  -2  -4  -5  131.83    7.87
   2  -4  -5  163.97   14.88
  -2   4  -4  115.13    7.53
  -2  -4  -4  118.25    6.95
  -2  -4  -4  142.91    7.99
  -2   4  -4  143.10    5.62
   2  -4  -4   77.32   11.00
   2  -4  -4   93.00   13.16
   2  -4  -3  425.17   22.99
  -2  -4  -3  459.40   11.89
  -2   4  -3  480.79   12.83
  -2  -4  -3  494.76   15.03
  -2   4  -3  464.42   14.93
   2  -4  -3  395.16   20.38
  -2  -4  -2   83.21    5.20
  -2   4  -2   82.43    6.63
  -2   4  -2   93.92    7.24
   2  -4  -2  115.72   11.61
   2  -4  -2  107.31   10.57
   2  -4  -1   65.24    9.30
  -2   4  -1   86.68    8.77
  -2  -4  -1   84.08    5.28
   2  -4  -1   60.21    7.64
  -2   4  -1   74.51    7.35
  -2   4   0  903.80   25.22
   2  -4   0 1014.17   26.66
   2  -4   0  912.66   27.29
  -2   4   0  977.35   26.24
   2  -4   1   73.12    7.76
   2  -4   1   80.05    8.22
  -2   4   1   72.79    8.31
  -2   4   1   63.84    8.49
  -2   4   2  104.20    9.93
   2  -4   2  100.04    8.75
  -2   4   2  113.97   10.37
   2  -4   2   91.03    7.98
   2  -4   3  477.18   16.24
  -2   4   3  452.57   20.75
   2  -4   3  448.54   15.34
   2   4   3  499.19    9.80
  -2   4   4   93.46   13.11
  -2   4   4   95.23   11.93
   2  -4   4  131.14    8.68
   2   4   4  128.47    5.66
   2  -4   4  111.36    7.24
   2   4   5  142.14    8.96
   2  -4   5  150.97    9.28
   2   4   5  166.87    7.88
  -2   4   5  154.02   15.81
  -2  -4   6  622.84   34.31
   2   4   6  789.29   18.74
  -2   4   6  645.45   29.07
  -2   4   6  713.13   30.73
   2  -4   6  774.02   19.48
   2   4   6  742.23   17.04
  -2   4   7  609.85   29.24
  -2  -4   7  639.14   35.51
   2   4   7  624.68   16.66
   2  -4   7  664.11   18.99
   2   4   7  618.33   17.31
   2  -4   8   60.06    6.39
   2   4   8   57.39    6.49
   2   4   8   44.03    4.96
  -2  -4   8   82.58   15.60
  -2   4   8   98.68   13.63
  -2   4   8   71.33   11.39
   2  -4   9   41.58    5.38
   2   4   9   48.60    5.56
  -2   4   9   40.50   10.80
   2   4   9   44.36    6.24
  -2   4   9   35.20    9.76
  -2  -4   9   49.03   13.54
  -2   4  10    1.19    7.00
  -2   4  10   12.16    7.90
  -2  -4  10   15.48   10.38
   2   4  10    5.38    4.10
   2   4  10    3.86    2.92
   2   4  11  254.63   11.48
  -2   4  11  194.98   18.64
  -2  -4  11  213.96   22.20
   2   4  11  208.62   14.21
  -2   4  11  204.57   20.99
  -2   4  12   80.86   13.22
  -2  -4  12  104.64   18.37
   2   4  12   55.68    5.96
   2   4  12   70.68    9.89
  -2   4  12   98.09   15.40
   2   4  13   18.36    5.13
  -2   4  13   30.16   10.34
   2   4  13   20.97    3.86
  -2  -4  13    7.91    8.29
  -2   4  13   35.16    9.23
  -2   4  14   58.28   12.61
   2   4  14   97.57    8.32
   2   4  14   86.44   10.73
  -2  -4  14   69.52   15.14
  -2   4  14   71.72   13.53
   2  -4  14   80.15    4.08
   2  -4  15   49.77    3.67
   2   4  15   56.84    6.93
  -2   4  15   65.14   14.18
   2   4  15   54.02    9.67
  -2   4  15   76.09   13.15
  -2  -4  15   70.98   16.40
  -2  -4  16  -10.59   11.79
   2  -4  16    4.21    1.65
  -2   4  16   10.63    7.74
   2   4  16    1.27    2.77
  -2   4  16   -0.49    7.31
   2   4  16    0.42    5.46
  -2   4  17  196.27   21.69
   2   4  17  165.58   16.78
  -2   4  17  185.44   23.02
   2  -4  17  172.48    7.62
   2   4  17  187.02   12.28
  -2  -4  17  193.02   25.34
   2   4  18   52.20    7.34
   2   4  18   33.82    8.13
  -2   4  18   22.48   11.30
   2  -4  18   50.26    4.75
  -2   4  18   38.66   11.45
  -2  -4  18   44.05   15.65
  -2  -4  19   63.82   14.96
   2   4  19   50.83    7.15
  -2   4  19   44.54   11.36
  -2   4  19   42.86   12.99
   2   4  19   38.43   10.67
   2  -4  19   43.76    4.48
  -2   4  20   32.78   12.91
  -2  -4  20   38.64   15.83
   2   4  20   30.64   10.00
   2  -4  20   22.57    3.41
  -2   4  20   22.05    9.03
   2   4  20   31.46    6.12
  -2   4  21  261.69   28.27
   2  -4  21  197.82   10.00
  -2   4  21  280.59   27.55
   2   4  21  204.28   14.43
   2   4  21  186.79   21.03
  -2  -4  21  264.45   31.40
  -2  -4  22   53.86   15.02
   2   4  22   55.20   12.35
  -2   4  22   58.89   15.46
  -2   4  22   62.97   13.64
   2  -4  22   40.79    4.97
   2   4  22   54.22    7.96
  -2  -4  23   83.01   18.80
  -2   4  23   95.83   18.01
   2   4  23   65.50    9.06
   2   4  23   72.94   14.71
  -2   4  23   75.29   17.10
  -2   4  24   24.71   11.06
   2   4  24   39.06    7.68
  -2   4  24   35.49   12.06
   2   4  24   23.87   10.39
  -2  -4  24   30.92   15.56
   2   4  25    6.27    8.07
   2   4  25   15.09    5.64
  -2   4  25   -8.83   10.68
  -2   4  25   25.51   12.09
  -2  -4  25   19.10   14.52
  -2   4  26   25.14   10.01
  -2  -4  26   50.23   17.70
   2   4  26    3.04   10.38
  -2   4  26   34.08   15.89
  -2   4  27   -3.52    9.65
  -2  -4  27    7.13   15.19
  -2   4  27   -1.98    9.71
   2   4  27   16.45   10.24
  -2   4  28   -1.53   10.30
   2   4  28    7.45   10.47
  -2  -4  28   11.87   10.99
  -2   4  28   22.91   12.30
  -2   4  29   14.70   12.83
  -2   4  29   22.21   12.79
   2   4  29   32.82   15.61
  -2   4  30  -14.62   10.50
  -2   4  30    5.70   12.39
  -2   4  31    8.42   10.66
  -2   4  31   16.20   16.33
  -2   4  32    5.77   15.61
  -2   4  33    8.11   14.74
  -2   4  34    8.76   16.54
  -2  -5 -16   84.50   12.74
  -2  -5 -15   42.69    9.99
  -2  -5 -14   76.02   10.62
  -2  -5 -13  130.44   12.09
  -2  -5 -12   73.49    9.40
  -2  -5 -11   30.31    6.46
  -2  -5 -10   51.88    6.90
  -2  -5  -9  309.38   14.38
   2  -5  -9  286.71   24.45
  -2  -5  -8  425.55   15.64
   2  -5  -8  325.53   25.92
   2  -5  -7  154.33   16.95
  -2  -5  -7  167.88    9.65
  -2  -5  -7  162.53   10.31
   2  -5  -6  128.09   15.25
   2  -5  -6  105.22   14.33
  -2  -5  -6  195.37   10.86
  -2  -5  -6  184.56    9.61
   2  -5  -5   40.24   10.35
  -2   5  -5   29.50    5.10
  -2  -5  -5   23.27    4.50
  -2   5  -5   23.21    2.32
   2  -5  -5   26.23    7.82
  -2  -5  -5   26.71    4.31
  -2   5  -4  975.19   15.28
  -2  -5  -4  971.24   21.02
  -2   5  -4  978.25   23.05
  -2  -5  -4  920.77   20.88
   2  -5  -4  971.16   33.94
  -2   5  -3 1769.59   31.92
  -2  -5  -3 1803.11   29.53
  -2   5  -3 1862.56   24.31
  -2  -5  -3 1776.57   26.72
   2  -5  -3 1814.69   43.25
   2  -5  -3 1860.14   46.13
   2  -5  -2  142.72   13.52
  -2   5  -2  193.01   11.24
  -2  -5  -2  274.23   12.19
   2  -5  -2  109.81   12.96
  -2   5  -2  230.26   10.51
  -2  -5  -2  232.24    9.34
  -2   5  -1  125.29    8.63
   2  -5  -1   94.23   10.71
  -2  -5  -1  118.56    6.88
   2  -5  -1   94.14   10.62
  -2   5  -1  104.92    9.13
   2  -5   0    9.97    5.21
  -2   5   0    8.43    3.59
  -2  -5   0    3.59    2.53
   2  -5   0    7.61    4.42
  -2   5   0   12.28    5.03
  -2   5   1   98.81   10.10
  -2   5   1   94.11    8.76
   2  -5   1  102.92   10.14
   2  -5   1  108.00    9.71
  -2   5   2  164.52   12.54
   2  -5   2  198.65   12.05
   2   5   2  214.75    7.78
  -2   5   2  155.34   13.15
   2  -5   2  224.67   12.87
   2   5   3 1797.57   23.00
   2  -5   3 1915.27   34.70
  -2   5   3 2022.19   43.71
   2  -5   3 1759.15   31.41
  -2   5   3 1639.85   41.12
   2  -5   4  889.72   23.67
   2  -5   4  913.47   20.51
  -2   5   4  984.91   33.25
   2   5   4  958.76   17.42
  -2   5   4  909.79   31.52
  -2   5   5   23.84    7.63
   2  -5   5   18.28    3.52
  -2   5   5   39.71    9.87
   2   5   5   26.20    4.62
   2  -5   5   27.32    5.60
   2   5   5   21.73    3.75
  -2   5   6  106.98   12.98
  -2   5   6  141.31   14.40
   2   5   6  175.22    8.77
   2   5   6  207.94   10.34
   2  -5   6  177.95   10.55
  -2   5   7  159.40   16.40
   2   5   7  152.24    9.19
   2  -5   7  160.60   10.67
  -2   5   7  123.27   13.90
   2   5   7  172.05   10.27
  -2  -5   8  317.54   25.36
  -2   5   8  340.61   24.24
  -2   5   8  323.11   23.41
   2  -5   8  410.82   16.47
   2   5   8  357.10   13.86
   2   5   8  376.66   15.63
   2   5   9  321.85   15.50
  -2   5   9  312.52   23.55
   2   5   9  287.74   12.47
   2  -5   9  337.50   15.44
  -2  -5   9  288.87   25.59
   2   5  10   39.83    6.43
   2  -5  10   42.72    6.01
  -2   5  10   59.34   12.43
  -2  -5  10   48.04   14.24
   2   5  10   41.45    5.31
  -2  -5  11   49.54   12.89
   2   5  11   45.10    7.49
  -2   5  11   62.97   10.58
   2  -5  11   39.29    6.53
  -2   5  11   55.72   12.13
   2   5  11   28.20    4.43
   2   5  12   63.44    6.53
  -2   5  12   83.11   14.48
   2   5  12   69.75    9.19
  -2   5  12   56.98   11.49
  -2  -5  12   59.79   13.09
  -2  -5  13  120.38   18.25
  -2   5  13  138.35   18.06
   2   5  13  129.15    9.45
  -2   5  13  144.17   17.69
   2   5  13  131.21   13.01
   2   5  14   53.20    6.53
  -2  -5  14   70.30   15.98
  -2   5  14   56.71   12.52
   2   5  14   58.98    9.99
  -2   5  14   72.78   12.87
  -2  -5  15   45.71   14.72
  -2   5  15   39.92   11.74
   2   5  15   38.90    9.29
   2   5  15   35.27    6.18
  -2   5  15   46.97   11.47
   2  -5  15   27.12    2.50
  -2  -5  16  103.74   19.12
  -2   5  16  107.88   15.69
   2   5  16   90.65    8.68
  -2   5  16   75.81   15.74
   2  -5  16   78.16    4.58
   2   5  16   80.13   11.79
  -2   5  17   39.53   10.89
   2   5  17   14.67    4.22
   2   5  17   14.48    7.54
  -2   5  17   29.46   12.06
   2  -5  17   16.85    2.49
  -2  -5  17   12.46   10.13
   2   5  18    5.49    4.36
  -2  -5  18   11.19   11.15
   2  -5  18    5.70    1.92
  -2   5  18    9.32    6.69
   2   5  18    6.08    5.70
  -2   5  19   51.19   13.43
  -2  -5  19   58.32   15.48
   2   5  19   79.26    9.25
   2   5  19   58.31   11.83
  -2   5  19   37.49   12.20
   2  -5  19   70.33    5.27
   2   5  20   31.79    6.69
   2   5  20   20.41    9.15
  -2   5  20   47.32   12.66
   2  -5  20   22.14    3.34
  -2   5  20   42.65   12.45
  -2  -5  20   66.39   18.78
  -2   5  21    0.49    9.75
  -2  -5  21   19.44   13.73
  -2   5  21    6.58    8.42
   2  -5  21    2.49    1.93
   2   5  21   10.49    5.65
   2   5  21   15.10    8.06
   2   5  22   26.54    6.31
  -2  -5  22   28.72   15.06
  -2   5  22   17.88   10.61
   2   5  22   27.19    9.70
  -2   5  22   24.09   10.50
  -2  -5  23  -15.17   13.02
   2   5  23   -2.40    4.09
  -2   5  23   24.32   11.85
  -2   5  23    9.40   12.44
   2   5  23    6.57    9.34
  -2   5  24   -3.36   11.06
   2   5  24    1.81    7.52
  -2   5  24    4.61    8.41
  -2  -5  24    8.69   11.43
   2   5  24  -11.63    5.39
  -2   5  25   15.29   10.20
   2   5  25   10.96    4.07
  -2  -5  25   -7.11   12.07
   2   5  25    6.74    7.90
  -2   5  25   16.77    9.70
  -2  -5  26   22.91   14.49
   2   5  26    8.48    6.15
  -2   5  26   -8.10   12.87
   2   5  26   -8.79    8.61
  -2   5  26   16.85   11.97
  -2   5  27   -0.08   12.27
   2   5  27   -4.46    8.50
  -2  -5  27   15.85   16.32
  -2   5  27   20.62   12.43
  -2   5  28   -1.78   11.53
  -2  -5  28   15.62   13.04
   2   5  28   -9.00   10.16
  -2   5  28  -14.97   10.72
  -2   5  29   16.07   14.74
   2   5  29    5.76    9.94
  -2   5  29    8.61    8.25
  -2   5  30  -14.23   12.93
  -2   5  30    1.97    9.06
  -2   5  31   13.30   11.12
  -2   5  31   43.35   19.61
  -2   5  32   20.29   20.65
  -2   5  33    6.53   13.11
  -2   5  34   24.86   18.79
  -2  -6 -14  200.27   16.68
  -2  -6 -13   13.13    5.54
  -2  -6 -12  360.66   19.53
  -2  -6 -11  100.97    9.99
  -2  -6 -10  181.73   12.34
   2  -6  -9  118.48   17.51
  -2  -6  -9  152.14   10.98
  -2  -6  -8  447.74   16.81
   2  -6  -8  421.31   25.75
  -2  -6  -8  455.28   19.29
   2  -6  -8  401.79   27.44
   2  -6  -7    5.45    6.52
  -2  -6  -7    1.81    3.23
  -2  -6  -7    4.27    4.94
   2  -6  -7    7.54    6.30
  -2  -6  -6  365.23   15.63
  -2  -6  -6  322.00   13.49
  -2   6  -6  318.94   14.11
  -2   6  -6  310.99    7.99
   2  -6  -6  314.29   22.96
   2  -6  -6  320.06   21.51
  -2  -6  -5   96.26    8.38
  -2   6  -5   99.17    4.91
  -2  -6  -5  110.79    8.38
   2  -6  -5   89.90   12.42
   2  -6  -5  118.93   14.30
  -2   6  -5  102.93    8.98
   2  -6  -4  257.87   18.70
  -2  -6  -4  308.87   13.04
   2  -6  -4  309.54   20.77
  -2   6  -4  296.22   13.84
  -2  -6  -4  310.37   13.38
  -2   6  -4  307.88    9.52
   2  -6  -3   51.71    9.79
  -2   6  -3   54.77    7.21
   2  -6  -3   49.27    8.59
  -2   6  -3   64.51    5.14
  -2  -6  -3   55.62    6.12
  -2  -6  -3   50.27    5.58
  -2  -6  -2  109.52    7.65
  -2   6  -2  107.20    9.75
   2  -6  -2   68.10   10.59
  -2  -6  -2  121.04    8.95
   2  -6  -2   53.02    9.95
  -2   6  -2  104.03    7.50
   2  -6  -1   53.40   10.05
  -2   6  -1   57.65    7.95
  -2  -6  -1   46.70    5.99
   2  -6  -1   54.05   11.07
  -2   6  -1   48.59    6.70
  -2  -6  -1   74.03    9.01
  -2  -6   0 5349.75   50.20
   2  -6   0 5451.75   67.70
  -2   6   0 5319.83   68.04
  -2   6   0 5384.79   58.24
   2  -6   0 5215.54   71.68
  -2   6   1   59.05    9.02
   2  -6   1   49.78    7.64
  -2  -6   1   63.51    7.29
   2  -6   1   47.27    8.92
  -2   6   1   46.63   10.21
   2  -6   2   90.50   10.22
  -2   6   2   69.18    8.80
   2  -6   2   95.87    8.90
  -2   6   2   72.04   10.86
  -2   6   3   45.38   10.09
   2  -6   3   57.27    7.14
   2  -6   3   64.31    6.88
  -2   6   3   50.00    8.52
   2   6   3   59.58    5.02
   2  -6   4  291.34   14.83
   2   6   4  256.82   13.01
   2  -6   4  260.55   11.66
  -2   6   4  277.79   17.14
   2   6   4  296.40   11.09
  -2   6   4  283.33   18.55
   2   6   5  104.57    7.13
   2  -6   5  106.92    7.04
   2   6   5   95.65    8.16
  -2   6   5  122.36   13.09
   2  -6   5   94.91    9.13
  -2   6   5  127.80   12.36
  -2   6   6  367.55   22.42
   2   6   6  384.42   14.30
   2  -6   6  328.23   15.94
   2   6   6  359.56   14.33
   2  -6   6  316.65   10.25
  -2   6   6  358.48   20.58
   2   6   7    2.73    2.87
  -2   6   7   -5.67    5.91
   2  -6   7    6.79    3.65
   2  -6   7    3.41    1.66
  -2   6   7    6.76    6.90
   2   6   7    0.87    2.63
   2   6   8  441.63   18.14
   2  -6   8  394.94   17.35
  -2   6   8  419.04   24.03
   2   6   8  384.60   15.32
  -2   6   8  456.25   26.64
   2   6   9  141.53    9.12
  -2   6   9  133.06   14.43
   2  -6   9  151.96   11.31
  -2  -6   9  115.99   17.64
  -2   6   9  119.84   15.39
   2   6   9  132.26   11.04
   2  -6  10  180.16   12.24
   2   6  10  167.13   12.81
  -2   6  10  269.21   20.33
  -2   6  10  268.15   22.57
   2   6  10  147.01    9.75
  -2  -6  10  227.12   24.40
   2   6  11  108.62   10.56
   2   6  11  106.68    8.54
  -2  -6  11  115.14   19.40
   2  -6  11   97.40    9.71
  -2   6  11   97.67   13.44
  -2   6  11   88.08   14.06
   2   6  12  324.89   14.97
   2  -6  12  315.16   17.59
  -2   6  12  503.15   32.17
   2   6  12  343.83   19.29
  -2   6  12  521.84   29.50
  -2  -6  12  440.84   32.98
   2   6  13    4.07    5.19
   2   6  13    6.53    3.38
  -2   6  13    8.60    7.72
  -2  -6  13   13.75   11.00
  -2   6  13   20.54   10.20
   2   6  14  201.45   16.07
  -2   6  14  216.72   20.20
  -2  -6  14  203.53   24.35
   2   6  14  204.69   12.53
  -2   6  14  222.65   23.30
  -2   6  15    8.69    6.80
   2  -6  15    7.90    1.46
   2   6  15    1.96    3.04
  -2   6  15    6.73    6.16
  -2  -6  15   -5.19    9.64
   2   6  15    6.22    5.25
   2  -6  15    3.12    1.10
  -2   6  16    6.12    8.47
   2  -6  16   -0.07    1.04
  -2  -6  16    9.98    9.70
  -2   6  16    7.05    6.29
   2   6  16   -0.17    2.89
   2   6  16   13.87    6.62
   2   6  17    8.06    4.40
   2  -6  17    3.79    1.47
  -2   6  17    6.68    7.18
   2   6  17    4.77    5.72
  -2   6  17   -1.10    7.63
  -2  -6  17    9.49   10.46
   2   6  18   46.73    7.32
  -2  -6  18   43.78   14.31
   2  -6  18   36.95    3.67
  -2   6  18   34.66   10.33
  -2   6  18   22.79    9.74
   2   6  18   47.11   10.17
  -2  -6  19   25.55   12.68
   2  -6  19   20.42    2.85
   2   6  19   13.72    4.37
   2   6  19   22.78   10.02
  -2   6  19   26.69   10.52
  -2   6  19   11.37    9.61
   2   6  20   58.36   12.29
  -2  -6  20   76.18   19.04
  -2   6  20   87.41   18.87
  -2   6  20   70.52   14.24
   2   6  20   85.52    9.86
   2  -6  20   72.71    5.15
   2  -6  21   26.19    3.32
  -2   6  21   51.73   15.95
  -2  -6  21   38.85   13.63
   2   6  21   36.08    7.41
  -2   6  21   38.26   11.52
   2   6  21   25.28    9.88
  -2  -6  22   90.52   21.84
   2   6  22   51.07    8.54
  -2   6  22   73.28   15.92
   2   6  22   43.63   12.08
  -2   6  22   97.22   17.05
  -2  -6  23   30.36   13.72
   2   6  23   25.31   10.31
   2   6  23   38.94    8.26
  -2   6  23   10.17    7.89
  -2   6  23   29.14   13.92
  -2  -6  24   59.11   18.35
  -2   6  24   24.33   16.45
   2   6  24   23.19   11.34
   2   6  24   47.15    8.22
  -2   6  24   18.23    8.59
   2   6  25   -0.29    4.86
  -2  -6  25   22.38   13.88
  -2   6  25   14.64   12.16
   2   6  25   16.31   10.39
  -2   6  25   11.51    9.26
  -2   6  26  -11.40    9.92
  -2  -6  26    1.95   11.55
  -2   6  26    4.33   12.00
   2   6  26    6.62    5.29
   2   6  26    4.74    8.21
  -2  -6  27  -19.84   13.65
  -2   6  27    6.13    8.31
   2   6  27    7.13   10.20
  -2   6  27   -8.73   12.09
  -2   6  28   49.66   20.01
  -2   6  28   34.90   12.76
   2   6  28   30.72   12.41
  -2   6  29    8.74   10.42
  -2   6  29   22.76   15.37
  -2   6  30    4.36    8.91
  -2   6  30   28.57   17.00
  -2   6  31   16.53   16.14
  -2   6  31    3.70    9.16
  -2   6  32   26.94   20.17
  -2   6  33   -2.19   14.54
  -2   6  34   -3.26   15.79
  -2  -7 -13  210.51   17.02
  -2  -7 -12  447.99   22.17
  -2  -7 -11   97.38   10.15
  -2  -7 -10    6.37    4.42
  -2  -7  -9  103.15    9.35
  -2  -7  -9   98.91   10.63
   2  -7  -8  120.07   15.43
  -2  -7  -8   99.37   10.58
  -2  -7  -8   87.90    8.56
   2  -7  -8  105.71   15.45
  -2  -7  -7   33.47    5.53
   2  -7  -7   15.24    7.22
   2  -7  -7   21.47    8.68
  -2  -7  -7   29.18    6.24
  -2  -7  -6  161.11   10.19
  -2   7  -6  153.79   10.30
  -2  -7  -6  152.00   11.73
   2  -7  -6  149.44   16.64
   2  -7  -6  134.18   15.54
  -2   7  -6  154.25    6.44
  -2  -7  -5   57.13    7.54
  -2  -7  -5   61.05    6.34
  -2   7  -5   44.91    6.46
   2  -7  -5   64.31   11.15
   2  -7  -5   57.99   11.10
  -2   7  -5   50.87    4.18
   2  -7  -4  417.26   24.31
  -2   7  -4  449.46   18.57
  -2   7  -4  467.40   12.23
  -2  -7  -4  437.50   16.25
   2  -7  -4  388.96   22.97
  -2  -7  -4  440.46   16.77
   2  -7  -3  961.52   35.22
  -2  -7  -3  937.78   24.13
  -2   7  -3  916.87   26.62
  -2  -7  -3  955.26   24.27
   2  -7  -3  868.16   32.76
  -2   7  -3  981.20   19.23
  -2  -7  -2   40.19    6.06
  -2  -7  -2   45.55    6.35
   2  -7  -2   52.79    9.00
  -2   7  -2   54.31    7.88
   2  -7  -2   70.54   10.32
  -2   7  -2   46.97    5.41
   2  -7  -1  379.17   21.03
   2  -7  -1  361.77   21.08
  -2   7  -1  295.40   17.15
  -2  -7  -1  311.97   14.73
  -2  -7  -1  339.40   14.02
  -2   7  -1  349.10   14.05
  -2   7   0   18.03    4.37
  -2   7   0   20.48    5.99
   2  -7   0   15.37    4.89
  -2  -7   0   10.15    3.71
   2  -7   0   18.98    5.90
  -2  -7   0   15.26    4.57
   2  -7   1  292.31   15.95
  -2  -7   1  398.42   15.59
   2  -7   1  332.36   17.55
  -2   7   1  313.38   15.51
  -2   7   1  374.93   19.37
   2   7   1  305.30   11.73
   2   7   2   49.50    5.54
  -2   7   2   77.45   10.39
   2  -7   2   42.64    6.30
  -2   7   2   64.32    8.72
  -2  -7   2   63.49    6.58
   2  -7   2   49.16    7.97
   2  -7   3  950.01   24.02
  -2   7   3  895.27   32.99
   2   7   3 1002.88   21.19
  -2   7   3  904.40   29.93
   2   7   4  441.12   15.03
   2  -7   4  469.52   19.95
  -2   7   4  398.80   21.34
   2  -7   4  488.14   16.12
   2   7   4  465.08   18.50
  -2   7   4  445.38   25.01
   2  -7   5   52.17    5.64
   2   7   5   47.24    5.72
   2   7   5   56.86    6.65
  -2   7   5   73.98   10.96
  -2   7   5   67.31    9.91
   2  -7   5   56.94    7.90
   2   7   6  161.31   10.29
  -2   7   6  121.70   14.52
   2  -7   6  165.67   12.21
  -2   7   6  153.90   14.96
   2  -7   6  173.22    8.40
   2   7   6  150.32    9.56
  -2   7   7   16.66    6.66
   2  -7   7   35.41    6.22
   2  -7   7   32.21    3.67
  -2   7   7   24.68    8.05
   2   7   7   32.48    5.24
   2   7   7   35.40    6.13
   2   7   8  103.41    9.25
   2  -7   8   98.95    9.76
  -2   7   8  106.77   12.04
   2   7   8   91.15    8.30
   2  -7   8   92.80    5.07
  -2   7   8  115.53   15.47
   2   7   9  125.12   10.41
   2   7   9  102.84    8.59
   2  -7   9   88.52    4.50
   2  -7   9   88.09    9.37
  -2   7   9  140.90   14.52
  -2   7   9  104.69   15.10
  -2   7  10   22.68    7.66
  -2   7  10    8.30    8.37
   2  -7  10    7.92    3.12
   2   7  10   10.24    4.63
   2  -7  10    6.00    1.46
  -2  -7  10   14.52    9.79
   2  -7  10    9.19    4.59
   2   7  10    5.78    4.26
  -2   7  11  105.96   13.59
  -2  -7  11  103.26   17.76
   2  -7  11  101.45   10.38
  -2   7  11  105.19   15.63
   2   7  11   96.18   10.25
   2   7  11   81.78    8.14
  -2   7  12  315.41   25.85
  -2   7  12  334.00   23.76
  -2  -7  12  348.41   30.56
  -2   7  13  153.14   18.13
   2   7  13  197.52   15.82
  -2   7  13  136.87   18.70
   2   7  13  173.78   11.96
  -2  -7  13  161.80   22.22
   2   7  14  154.04   14.92
  -2  -7  14  217.83   26.40
  -2   7  14  259.91   24.97
   2   7  14  144.54   11.20
  -2   7  14  241.00   20.84
   2  -7  15   38.12    2.54
   2   7  15   38.20    6.04
   2  -7  15   25.27    3.09
  -2   7  15   46.10   11.88
  -2   7  15   52.09   11.40
  -2  -7  15   34.12   12.29
   2   7  15   40.57    8.30
   2  -7  16   44.14    2.93
   2   7  16   60.43    8.19
   2  -7  16   37.25    3.89
  -2   7  16   66.46   13.61
  -2  -7  16   71.84   17.23
   2   7  16   54.16   10.37
  -2  -7  17   31.56   14.19
   2   7  17   17.00    5.14
   2   7  17   15.26    6.68
   2  -7  17   12.74    1.79
  -2   7  17   17.20    8.59
  -2   7  17   32.62   14.63
   2  -7  18  266.01    8.67
  -2   7  18  206.31   25.86
   2   7  18  224.75   20.23
   2  -7  18  226.64    8.29
  -2   7  18  165.28   20.44
  -2  -7  18  153.89   24.41
   2  -7  19    6.27    1.88
   2   7  19    8.48    4.59
   2  -7  19    5.55    1.84
  -2   7  19   10.43    9.47
   2   7  19    9.05    5.59
  -2   7  19    4.32    9.28
  -2  -7  20   61.67   17.21
   2   7  20   83.76   13.83
  -2   7  20   98.14   15.37
   2   7  20   83.98   10.28
  -2   7  20  118.21   20.60
   2  -7  20   52.78    4.15
  -2   7  21    5.70    7.81
  -2   7  21   18.80   13.78
  -2  -7  21   30.77   16.47
   2   7  21    9.37    6.57
   2   7  21   13.31    6.33
  -2  -7  22   34.68   16.47
  -2   7  22   43.58   11.08
   2   7  22   49.09   11.54
   2   7  22   46.99    8.36
  -2   7  22   54.80   17.03
  -2  -7  23  105.02   24.50
   2   7  23   67.02   13.91
  -2   7  23  109.92   18.07
  -2   7  23   87.88   18.27
   2   7  23   69.15   10.00
   2   7  24    0.06    4.39
  -2   7  24    1.93    7.54
  -2  -7  24   -0.90   13.20
  -2   7  24    6.85   10.43
   2   7  24   -8.88    7.27
   2   7  25   13.44    6.26
  -2  -7  25   -0.94   12.43
   2   7  25   13.77    8.48
  -2   7  25   31.44   14.69
  -2   7  25   24.70   11.56
  -2  -7  26   64.19   20.48
  -2   7  26   56.81   14.34
  -2   7  26   52.99   16.37
   2   7  26   51.47    9.37
   2   7  26   44.48   13.53
  -2   7  27    0.57    7.21
  -2  -7  27   18.22   17.54
  -2   7  27   -0.65   11.97
   2   7  27    1.86    7.72
   2   7  28    4.04    8.63
  -2   7  28   21.29   13.83
  -2   7  28   24.91   11.66
  -2   7  29   32.26   13.85
  -2   7  29   13.83   12.59
  -2   7  30    8.67   17.75
  -2   7  30   15.60   10.29
  -2   7  31   32.24   17.54
  -2   7  31   -1.15    9.05
  -2   7  32   16.89   14.58
  -2   7  33   -1.50   12.87
  -2   7  34   27.34   19.67
  -2  -8 -11   28.99    6.77
  -2  -8 -10  129.09   13.34
  -2  -8 -10  114.71   11.02
  -2  -8  -9  197.20   13.32
  -2  -8  -9  204.03   15.76
  -2  -8  -8   89.35    9.30
  -2  -8  -8  101.67   11.42
   2  -8  -7  118.94   15.74
  -2  -8  -7   96.64   10.10
  -2  -8  -7   76.37    8.01
   2  -8  -7  101.24   14.56
  -2  -8  -6   51.40    6.51
   2  -8  -6   49.14   11.46
   2  -8  -6   48.87   10.31
  -2   8  -6   46.48    7.04
  -2   8  -6   51.55    4.44
  -2  -8  -6   59.24    8.23
  -2   8  -5   33.99    6.05
  -2  -8  -5   36.26    6.84
   2  -8  -5   19.53    8.01
  -2  -8  -5   37.76    5.43
   2  -8  -5   27.19    7.86
  -2   8  -5   34.46    3.81
  -2   8  -4    9.39    4.45
   2  -8  -4   -5.61    6.28
   2  -8  -4   14.57    6.52
  -2   8  -4    4.04    2.51
  -2  -8  -4    6.17    4.17
  -2  -8  -4    7.19    3.91
  -2   8  -3  494.33   21.14
   2  -8  -3  546.27   27.13
  -2  -8  -3  482.22   19.18
  -2  -8  -3  497.86   18.26
  -2   8  -3  500.64   14.73
  -2   8  -2  217.30   10.52
  -2   8  -2  216.72   14.37
   2  -8  -2  184.08   15.48
  -2  -8  -2  222.87   12.68
  -2  -8  -2  244.35   12.65
   2  -8  -2  182.05   14.78
  -2   8  -1  115.88   12.36
   2  -8  -1  108.76   12.22
  -2  -8  -1  123.14   10.04
  -2  -8  -1  123.00    9.96
  -2   8  -1  115.43    8.93
   2  -8  -1  123.47   14.76
   2  -8   0  223.23   17.83
  -2  -8   0  251.86   13.50
  -2   8   0  291.25   17.04
  -2  -8   0  293.96   15.21
   2  -8   0  253.13   15.64
  -2   8   0  269.42   13.62
   2  -8   1  104.31    9.78
   2  -8   1   99.90   11.03
  -2  -8   1  148.72   11.86
  -2   8   1  120.90   14.74
  -2  -8   1  149.71   11.02
   2   8   1  111.50    8.53
  -2   8   1  120.03   10.70
   2  -8   2  222.22   16.24
  -2   8   2  138.26   13.75
   2   8   2  217.39   10.90
   2  -8   2  226.38   13.01
  -2  -8   2  186.96   12.04
  -2   8   2  166.03   11.77
   2  -8   3  508.80   22.72
   2   8   3  510.83   16.60
  -2   8   3  498.50   26.36
  -2  -8   3  592.13   20.75
   2  -8   3  530.80   18.83
  -2   8   3  540.41   22.33
   2   8   4    8.09    4.21
   2  -8   4    8.72    3.96
   2  -8   4    4.88    5.26
   2   8   4    2.29    3.67
  -2   8   4   -0.08    5.67
  -2   8   4   10.48    6.02
   2  -8   5   37.63    7.52
   2  -8   5   34.17    4.90
   2   8   5   33.75    5.15
   2   8   5   39.88    5.82
  -2   8   5   27.80    7.33
  -2   8   5   23.35    8.41
  -2   8   6   59.54   11.18
   2  -8   6   59.47    8.09
  -2   8   6   45.84    9.27
   2   8   6   51.17    6.53
   2  -8   6   59.81    5.74
   2   8   6   53.39    6.97
  -2   8   7  103.79   13.88
   2   8   7   82.91    8.63
   2  -8   7   82.80    5.92
   2  -8   7   65.58    9.70
  -2   8   7  107.55   12.31
   2   8   7   80.27    7.66
   2  -8   8  113.24    6.49
   2  -8   8   98.22   10.18
   2   8   8  117.65   10.35
   2   8   8   86.55    8.59
  -2   8   8  171.17   16.29
  -2   8   8  150.16   16.19
   2  -8   9  182.37   13.69
  -2   8   9  145.89   17.05
   2   8   9  203.19   12.46
  -2   8   9  139.14   15.39
   2   8   9  184.35   12.90
   2  -8   9  197.60    7.89
   2   8  10  126.12    9.87
   2  -8  10  124.18   11.58
  -2   8  10  129.58   14.36
   2  -8  10  127.77    5.86
  -2   8  10  151.63   17.34
   2   8  10  120.56   11.71
   2  -8  11   20.81    2.41
   2   8  11   25.76    6.63
  -2   8  11   28.87    7.73
  -2   8  11   42.63   10.64
   2   8  11   17.34    4.51
  -2  -8  11   24.65   11.23
   2  -8  11   19.85    5.07
   2  -8  12 1405.81   17.00
  -2   8  12 1835.04   60.73
   2   8  12 1571.97   35.44
   2   8  12 1682.89   45.50
  -2  -8  12 1649.48   66.07
   2  -8  12 1483.35   31.57
  -2   8  12 1662.73   53.54
   2   8  13  131.89   13.74
  -2   8  13  110.90   15.75
  -2  -8  13  108.31   18.97
   2   8  13  152.16   11.33
   2  -8  13  120.16    8.70
  -2   8  13  112.63   17.35
   2  -8  13  127.54    5.08
   2   8  14   80.34   11.45
   2   8  14   86.74    9.30
   2  -8  14   71.62    3.78
  -2   8  14   71.53   12.40
  -2  -8  14   55.12   14.04
   2  -8  14   58.99    6.20
  -2   8  14   76.15   13.98
  -2   8  15   35.56    9.54
  -2  -8  15   54.05   16.18
   2   8  15   66.21   10.79
  -2   8  15   50.58   12.21
   2   8  15   72.85    8.60
   2  -8  15   65.12    3.64
   2  -8  15   50.26    5.46
   2  -8  16   20.16    2.03
   2   8  16   21.39    5.88
  -2   8  16   31.61    9.74
   2  -8  16   18.22    3.05
  -2   8  16   36.89   12.01
  -2  -8  16   20.58   10.99
   2   8  16   34.09    9.14
   2  -8  17   63.92    3.67
   2   8  17   71.12   11.27
   2   8  17   85.98    9.42
   2  -8  17   60.13    5.16
  -2   8  17   69.77   12.67
  -2  -8  17   63.47   16.65
  -2   8  17   57.97   14.04
   2   8  18    7.28    4.36
   2   8  18   15.80    6.66
  -2   8  18   17.38   11.24
   2  -8  18    6.15    1.49
  -2  -8  18    2.63   13.45
   2  -8  18    4.95    2.06
  -2   8  18   11.20    7.54
  -2  -8  19   51.55   17.81
   2  -8  19   43.63    3.24
  -2   8  19   30.88   10.67
   2   8  19   57.97    8.68
  -2   8  19   35.69   14.06
   2   8  19   43.91    9.59
   2  -8  20   29.32    3.06
   2   8  20   45.80   10.71
  -2   8  20   67.01   14.05
  -2   8  20   63.22   16.21
  -2  -8  20   75.36   19.27
   2   8  20   37.57    7.20
   2   8  21   10.80    5.19
  -2   8  21   13.21    8.77
   2   8  21   29.87   10.75
  -2  -8  21    2.12   11.12
  -2   8  21   22.16   11.87
  -2   8  22  107.96   16.88
   2   8  22  145.37   18.61
   2   8  22  159.36   14.53
  -2   8  22  106.84   21.16
  -2  -8  22  145.99   25.92
  -2  -8  23   13.89   15.72
   2   8  23    5.67    6.95
  -2   8  23   -7.28   10.22
   2   8  23    1.28    4.46
  -2   8  23   21.57    9.53
   2   8  24    7.77    7.85
  -2  -8  24   10.63   13.95
  -2   8  24   12.05    8.54
  -2   8  24   29.01   14.98
   2   8  24   20.84    6.85
  -2   8  25    4.32    7.99
  -2  -8  25    1.55   13.05
  -2   8  25    3.42   13.14
   2   8  25    6.71    7.58
   2   8  25    2.07    5.48
   2   8  26   -5.08    5.88
  -2   8  26    8.82   12.47
  -2   8  26   12.51    9.74
  -2  -8  26   18.91   15.63
   2   8  26    2.60    7.56
  -2  -8  27   21.67   17.34
  -2   8  27   25.47   13.25
  -2   8  27   38.36   12.40
   2   8  27   40.66   14.50
  -2   8  28    8.43   10.52
   2   8  28    1.13    8.23
  -2   8  28   17.69   13.20
  -2   8  29   13.36   16.05
  -2   8  29    2.99    9.59
  -2   8  30    8.77   11.49
  -2   8  30    0.71   15.14
  -2   8  31    6.31   11.36
  -2   8  31   13.88   15.99
  -2   8  32   17.64   14.43
  -2   8  33    9.34   14.64
  -2  -9 -11   12.19    5.06
  -2  -9 -10   74.27   11.22
  -2  -9  -9   70.16   10.41
  -2  -9  -8    9.10    4.15
  -2  -9  -8    0.37    4.35
  -2   9  -7   24.25    6.43
  -2  -9  -7   19.79    5.24
  -2  -9  -7   39.64    7.71
  -2  -9  -6   -2.60    3.50
  -2  -9  -6    3.64    4.81
   2  -9  -6    0.44    6.85
  -2   9  -6    0.62    4.19
  -2   9  -6    2.70    2.01
  -2  -9  -5   17.17    4.85
  -2  -9  -5   22.30    6.45
  -2   9  -5   17.28    3.20
   2  -9  -5    9.35    7.47
  -2   9  -5   22.42    5.96
   2  -9  -5    3.33    6.76
   2  -9  -4   47.39   10.41
  -2  -9  -4   54.91    7.73
  -2   9  -4   45.83    4.92
  -2  -9  -4   41.17    6.55
   2  -9  -4   47.57    9.92
  -2   9  -4   51.58    7.79
  -2   9  -3    4.49    4.42
   2  -9  -3   13.97    7.04
  -2   9  -3    9.27    3.24
  -2  -9  -3    6.42    3.28
  -2  -9  -3    4.97    4.44
   2  -9  -3    9.86    5.06
   2  -9  -2  183.02   17.70
  -2  -9  -2  298.49   15.78
  -2   9  -2  294.21   17.49
  -2   9  -2  288.99   12.63
  -2  -9  -2  281.20   14.65
   2  -9  -2  194.24   16.04
   2  -9  -1  187.23   17.28
  -2   9  -1  136.52    9.41
   2  -9  -1  207.07   15.11
  -2   9  -1  143.76   13.34
  -2  -9  -1  134.94   10.83
  -2  -9  -1  152.51   10.86
  -2  -9   0  141.77   10.92
  -2  -9   0  153.18   10.93
   2  -9   0  128.07   11.60
   2  -9   0  121.68   13.66
  -2   9   0  145.12   10.15
  -2   9   0  135.39   12.39
   2  -9   1  121.18   12.46
  -2  -9   1  208.98   12.92
   2   9   1  132.92    9.17
   2  -9   1  160.16   12.47
  -2  -9   1  234.94   14.55
  -2   9   1  195.20   15.69
  -2   9   1  202.96   12.87
   2  -9   2  283.58   19.69
  -2   9   2  190.90   16.77
  -2  -9   2  188.43   13.37
  -2   9   2  195.88   13.07
  -2  -9   2  196.85   13.49
   2   9   2  323.90   13.83
   2  -9   2  294.19   15.87
  -2   9   3   11.39    5.11
   2  -9   3    7.07    5.35
   2  -9   3   12.98    4.92
  -2   9   3   10.51    6.01
   2   9   3    3.83    3.14
  -2  -9   3    3.64    3.77
   2   9   3    1.70    3.68
  -2   9   4   37.80    8.52
   2   9   4   46.83    6.32
   2   9   4   48.29    7.28
   2  -9   4   41.61    7.48
  -2  -9   4   47.21    7.39
   2  -9   4   55.06    6.50
  -2   9   4   44.22    7.49
   2   9   5   28.66    5.80
   2  -9   5   16.54    5.61
   2  -9   5   13.60    3.95
   2   9   5   13.26    4.20
  -2   9   5   23.69    8.45
  -2   9   5   16.57    6.74
   2  -9   6    2.53    2.69
  -2   9   6    8.40    5.99
   2   9   6    1.86    3.02
   2  -9   6   11.32    6.01
   2   9   6    1.51    3.91
  -2   9   6    7.47    8.36
  -2   9   7   31.80    8.00
   2  -9   7   22.45    6.45
   2   9   7   31.04    6.09
   2  -9   7   31.47    4.38
   2   9   7   14.42    4.68
  -2   9   7   34.89    9.03
   2  -9   8    6.27    2.69
   2  -9   8   12.74    5.51
   2   9   8    6.88    3.97
   2   9   8    5.47    4.15
  -2   9   8    4.27    6.92
  -2   9   8   11.74    6.23
   2   9   9   60.98    8.24
   2  -9   9   66.21    5.20
  -2   9   9   60.81   11.05
   2  -9   9   50.01    8.02
   2   9   9   55.96    7.48
  -2   9   9   60.59    9.88
   2   9  10   65.94    7.79
  -2   9  10   67.36   13.82
  -2   9  10   68.54   10.73
   2   9  10   60.75    8.48
   2  -9  10   63.90    4.82
   2  -9  11    4.29    1.90
   2   9  11   10.04    4.01
  -2   9  11   13.93    9.08
  -2   9  11   10.94    6.80
   2   9  11   12.79    6.29
   2   9  12  131.54   13.92
  -2  -9  12  104.56   19.83
  -2   9  12  146.00   18.27
   2  -9  12   89.95    5.29
   2  -9  12  100.10   10.18
  -2   9  12  152.33   16.59
   2   9  12   93.69    9.56
   2   9  13   89.80   11.74
  -2  -9  13   88.67   18.89
   2  -9  13   71.60    9.00
   2  -9  13   72.96    4.41
   2   9  13   77.46    8.83
  -2   9  13   85.08   12.65
  -2   9  13   86.04   15.29
   2  -9  14   64.44    7.54
  -2   9  14   79.67   14.52
  -2   9  14   82.76   12.82
   2  -9  14   62.77    3.99
  -2  -9  14  102.05   18.98
   2   9  14   72.52    8.68
   2   9  14   71.41   11.46
  -2   9  15  128.84   18.78
   2  -9  15  161.20    6.17
   2   9  15  170.58   16.47
   2  -9  15  137.99   10.17
  -2   9  15  135.86   16.62
  -2  -9  15  146.92   23.14
   2   9  15  186.34   13.91
  -2   9  16  141.08   17.37
   2  -9  16  108.95    8.72
   2   9  16  129.06   11.94
  -2  -9  16  117.07   21.13
   2   9  16  147.22   16.08
   2  -9  16  129.84    5.43
   2   9  17    3.92    6.49
   2   9  17    7.45    5.00
   2  -9  17   11.71    3.29
  -2   9  17    8.47    7.44
   2  -9  17    7.92    1.54
  -2  -9  17    9.35   12.48
  -2   9  17    7.01    8.58
  -2   9  18   72.03   15.83
   2  -9  18   38.23    4.49
   2  -9  18   31.73    2.85
  -2   9  18   62.66   12.77
   2   9  18   44.43    8.16
   2   9  18   38.93    8.58
  -2  -9  18   83.56   18.43
   2  -9  19   56.36    4.74
   2   9  19   81.39   11.14
  -2   9  19   87.65   17.97
   2  -9  19   58.81    3.62
  -2   9  19   87.61   14.87
   2   9  19   80.47   13.29
  -2  -9  19   89.31   21.00
   2   9  20   76.76   13.10
  -2   9  20  127.48   21.86
  -2   9  20  112.13   16.45
  -2  -9  20  102.59   22.24
   2   9  20   65.73    9.89
   2   9  21    1.18    7.04
  -2   9  21   19.98    8.34
  -2  -9  21   30.54   16.02
  -2   9  21   22.65   13.99
   2   9  21   13.23    5.48
  -2   9  22   32.92   10.63
  -2   9  22   42.21   14.27
  -2  -9  22   26.19   16.11
   2   9  22   32.21   11.85
   2   9  22   31.74    7.38
  -2  -9  23   11.90   14.24
   2   9  23   -2.41    5.37
   2   9  23    6.59    8.89
  -2   9  23    9.50    7.46
  -2   9  23   13.78   12.51
  -2   9  24   19.68   11.39
   2   9  24   21.00    8.56
   2   9  24   29.06    8.53
  -2  -9  24   27.04   18.82
  -2   9  24   17.93   10.98
  -2  -9  25   -8.72   13.76
   2   9  25    2.46    7.25
   2   9  25   -0.50    4.99
  -2   9  25   -2.48    7.58
  -2   9  25   24.00   13.96
   2   9  26    8.04    7.44
  -2   9  26   12.03    8.52
  -2   9  26   -5.25   12.39
   2   9  26   15.55    7.23
   2   9  27    8.93    5.77
   2   9  27   11.40    9.77
  -2   9  27   21.53   11.07
  -2   9  27   10.32   10.71
  -2   9  28   28.04   11.51
   2   9  28   24.74   14.64
  -2   9  28   16.47   12.42
  -2   9  29   16.66   11.99
  -2   9  29  -10.57   11.82
  -2   9  30   29.52   12.67
  -2   9  30   12.37   14.05
  -2   9  31   20.19   11.32
  -2   9  31   -1.01   13.06
  -2   9  32    5.39   11.36
  -2   9  32  -21.71   16.44
  -2   9  33   -5.35   16.69
  -2 -10 -12  228.59   19.19
  -2 -10 -11    2.18    5.44
  -2 -10 -10   24.47    8.73
  -2 -10  -9  377.78   22.82
  -2 -10  -8   29.76    7.45
  -2  10  -7  271.07   16.07
  -2  10  -7  273.18   11.56
  -2 -10  -6  136.05   13.26
  -2  10  -6  118.52   10.82
  -2  10  -6  117.69    7.78
  -2  10  -5   81.01    6.48
  -2 -10  -5   83.80   11.24
  -2 -10  -5   79.68    9.05
  -2  10  -5   95.98   10.14
  -2 -10  -4  301.41   17.60
  -2 -10  -4  312.02   15.76
  -2  10  -4  301.31   12.31
   2 -10  -4  228.16   19.23
  -2  10  -4  294.98   17.27
   2 -10  -4  227.42   20.58
   2 -10  -3    4.50    6.92
  -2 -10  -3    2.61    3.48
  -2 -10  -3   10.70    5.35
  -2  10  -3    9.49    3.89
  -2  10  -3    1.92    4.56
   2 -10  -3   -4.65    6.42
   2 -10  -2   10.59    6.84
  -2 -10  -2   12.73    4.77
  -2  10  -2   16.96    6.36
  -2  10  -2   15.15    4.60
   2 -10  -2   19.32    6.36
  -2 -10  -2   19.22    4.97
   2 -10  -1   67.18   12.12
  -2 -10  -1   70.12    8.30
  -2  10  -1   63.12    9.57
  -2  10  -1   60.47    6.97
   2 -10  -1   53.69    8.78
  -2 -10  -1   69.76    8.95
  -2 -10   0    1.88    4.10
  -2  10   0    9.24    5.10
   2  10   0    9.13    4.23
  -2  10   0    4.89    3.13
   2 -10   0    5.15    4.77
   2 -10   0   10.17    5.98
  -2 -10   0   10.93    4.98
  -2  10   1   64.48    8.11
  -2  10   1   71.11   10.26
  -2 -10   1   51.72    7.89
   2  10   1   59.76    7.11
   2 -10   1   58.59    9.61
  -2 -10   1   64.32    8.37
   2 -10   1   53.78    8.36
   2 -10   2   23.87    8.08
  -2 -10   2   23.70    5.82
  -2  10   2   28.16    9.65
  -2  10   2   15.58    5.13
  -2 -10   2   14.54    4.99
   2  10   2   20.26    5.02
   2 -10   2    9.69    4.31
  -2  10   3   10.42    5.14
  -2  10   3   12.67    5.57
  -2 -10   3    3.17    3.62
   2  10   3    5.56    3.39
   2 -10   3    5.98    5.00
  -2 -10   3    5.94    5.04
   2  10   3    2.05    4.70
   2 -10   3    1.56    3.52
   2 -10   4  273.55   18.08
  -2 -10   4  282.08   17.22
   2  10   4  322.15   17.19
   2 -10   4  291.23   14.46
  -2  10   4  273.24   20.34
   2  10   4  301.15   14.87
   2  10   5  101.92    9.44
   2  10   5   89.71    9.38
  -2  10   5   67.94   10.09
  -2 -10   5   67.01    9.25
   2 -10   5   89.92   11.19
   2 -10   5   97.46    8.45
  -2  10   5   67.64   12.12
   2 -10   6  125.78    9.00
   2 -10   6  124.13   12.66
   2  10   6  119.28   10.61
  -2  10   6  152.16   13.52
  -2  10   6  163.59   17.50
   2  10   6  131.77   10.83
   2  10   7  285.22   15.91
  -2  10   7  356.63   20.49
  -2  10   7  367.35   25.99
   2 -10   7  306.92   12.94
   2  10   7  275.08   15.22
  -2  10   8   20.11    7.55
   2  10   8   19.78    5.54
  -2  10   8   17.12    5.95
   2  10   8   27.76    5.59
   2 -10   8   22.38    3.90
   2  10   9  443.80   22.48
  -2  10   9  501.73   30.64
   2 -10   9  351.55   12.72
  -2  10   9  548.64   27.02
   2  10   9  276.93   16.05
  -2  10  10   28.26    8.37
   2  10  10   11.35    5.31
  -2  10  10   31.86   10.72
   2 -10  10   15.00    3.18
   2  10  10   14.33    5.29
  -2  10  11    3.15    6.14
   2  10  11    8.21    5.43
   2 -10  11    2.32    2.29
  -2  10  11    8.32    6.68
   2  10  11    2.70    3.30
   2  10  12  164.62   15.34
   2 -10  12  214.22    8.88
  -2  10  12  162.64   16.26
  -2  10  12  190.55   21.78
   2  10  12  198.82   13.84
   2  10  13   59.47    8.12
  -2  10  13   60.46   10.42
  -2 -10  13   45.23   14.82
   2  10  13   79.79   11.29
   2 -10  13   73.61    5.17
   2 -10  13   56.73    8.64
  -2  10  13   57.23   13.65
  -2  10  14    6.16    7.80
  -2  10  14   12.29    7.20
   2  10  14   10.04    4.01
   2 -10  14   13.37    2.49
  -2 -10  14   10.63   10.16
   2 -10  14   15.04    6.09
   2  10  14   15.82    5.90
   2  10  15   23.44    8.47
   2 -10  15   14.01    2.37
   2  10  15   12.51    4.73
   2 -10  15   13.51    5.31
  -2  10  15   12.12    6.38
  -2 -10  15   12.71   11.17
  -2  10  15    9.35    8.48
  -2  10  16   61.34   15.18
   2  10  16   61.62   11.93
   2 -10  16   50.12    3.83
   2  10  16   63.89    8.53
  -2  10  16   54.34   10.58
   2 -10  16   47.32    6.86
  -2 -10  16   60.23   16.79
  -2  10  17   10.10    6.57
   2  10  17    9.00    6.72
   2 -10  17   16.44    4.34
   2 -10  17   11.57    1.91
   2  10  17   19.07    6.09
  -2 -10  17   32.98   13.29
  -2  10  17   32.56   11.24
  -2  10  18    7.20    7.33
  -2  10  18   -4.27   11.24
   2 -10  18    2.18    2.72
   2 -10  18    2.47    1.22
   2  10  18    2.59    5.78
  -2 -10  18    9.14   12.52
   2  10  18    6.69    4.02
   2 -10  19   10.02    3.21
  -2  10  19    4.60    8.70
   2  10  19    6.33    4.78
  -2  10  19   11.89    6.78
  -2 -10  19   14.03   16.00
   2  10  19   16.28    8.58
   2  10  20   34.76    9.38
  -2  10  20   36.69   14.52
  -2 -10  20   47.11   18.49
   2  10  20   40.43    8.73
  -2  10  20   31.15   10.26
   2  10  21    1.53    4.72
  -2  10  21   18.30    9.01
  -2 -10  21   23.78   15.40
  -2  10  21   -7.67    9.89
   2  10  21    9.98    8.15
  -2  10  22   61.76   16.42
  -2 -10  22   65.94   19.98
   2  10  22   98.27   13.08
  -2  10  22   86.67   16.19
   2  10  22   77.61   14.58
  -2  10  23   19.29    9.16
   2  10  23   16.74    6.80
  -2 -10  23    6.89   15.81
  -2  10  23   11.26   13.08
   2  10  23    2.05    8.34
  -2  10  24   21.87   11.33
   2  10  24   16.53    7.23
  -2  10  24   -4.36   10.72
  -2 -10  24    4.70   12.83
   2  10  24   22.49   10.39
  -2 -10  25   78.44   23.67
  -2  10  25   54.81   13.93
  -2  10  25   41.20   15.34
   2  10  25   22.21   10.14
   2  10  25   67.93   11.71
  -2 -10  26   -8.12   12.94
   2  10  26    0.19    8.94
   2  10  26   -0.94    5.06
  -2  10  26  -14.18   11.63
  -2  10  26   12.60   10.44
   2  10  27   -7.89   10.53
   2  10  27   -1.08    5.74
  -2  10  27    6.50    7.74
  -2  10  27    3.42   10.40
  -2  10  28    5.13   13.07
  -2  10  28   12.42   10.80
  -2  10  29    8.94   14.39
  -2  10  29   -5.20    9.35
  -2  10  30   13.22   10.64
  -2  10  30   32.84   15.75
  -2  10  31    5.00    8.49
  -2  10  31   28.82   18.27
  -2  10  32   19.46   12.63
  -2  10  32   -9.47   16.52
  -2  10  33   22.62   18.79
  -2 -11 -12   23.00    8.64
  -2 -11 -11  167.09   17.90
  -2 -11 -10  379.09   25.51
  -2 -11  -9   88.36   12.40
  -2 -11  -8  127.55   13.66
  -2  11  -7   36.68    6.96
  -2  11  -7   44.61    5.39
  -2 -11  -7   46.80    9.35
  -2 -11  -6   91.43   12.11
  -2  11  -6   77.06    9.93
  -2  11  -6   87.79    7.33
  -2  11  -5   12.43    5.78
  -2  11  -5    5.12    2.95
  -2 -11  -5    9.77    6.44
  -2  11  -4  197.18   15.30
  -2  11  -4  177.89   10.22
  -2 -11  -4  203.42   15.51
  -2 -11  -3   28.91    7.00
  -2  11  -3   11.09    5.08
   2 -11  -3   30.61    7.65
  -2  11  -3   20.66    4.20
  -2  11  -2   29.96    4.97
  -2  11  -2   21.23    6.15
   2 -11  -2   27.84    6.94
  -2 -11  -2   24.61    5.79
  -2  11  -1  177.10   15.72
  -2  11  -1  151.57   10.82
  -2 -11  -1  173.19   13.68
  -2  11   0  371.62   21.47
  -2  11   0  333.41   16.67
  -2 -11   0  366.42   19.51
   2  11   0  351.70   16.25
   2 -11   0  337.20   20.20
  -2  11   1  232.02   18.09
  -2 -11   1  256.36   16.56
   2 -11   1  149.79   12.91
   2  11   1  154.14   11.78
  -2  11   1  277.48   15.15
   2 -11   1  151.04   15.85
  -2  11   2   19.51    5.59
  -2  11   2   19.90    7.03
   2 -11   2   30.59    8.60
  -2 -11   2   26.65    6.16
   2  11   2   33.09    5.98
   2 -11   2   28.32    6.05
  -2  11   3   28.87    8.20
   2  11   3   17.26    6.41
   2  11   3   21.43    5.68
  -2  11   3   33.43    6.57
  -2 -11   3   33.87    7.41
   2 -11   3   25.13    5.60
   2  11   4  206.35   13.15
   2  11   4  175.36   13.26
  -2  11   4  301.62   22.06
  -2  11   4  303.70   18.05
   2 -11   4  190.17   12.37
  -2  11   5    2.03    4.49
   2  11   5   10.27    4.71
  -2  11   5   10.08    7.38
   2  11   5    9.44    4.43
   2 -11   5    5.59    3.74
  -2  11   6   84.24   13.10
  -2  11   6   95.81   11.14
   2 -11   6   91.50    8.29
   2  11   6   97.96   10.02
   2  11   6   88.82    9.46
   2 -11   7   44.83    6.02
   2  11   7   37.37    6.84
   2  11   7   43.81    6.88
  -2  11   7   57.03   11.79
  -2  11   7   33.82    7.81
   2  11   8  128.41   11.82
   2  11   8  113.17   10.87
  -2  11   8   81.51   11.22
  -2  11   8   97.61   16.28
   2 -11   8  139.56    9.37
   2 -11   9   93.93    7.36
  -2  11   9   98.96   15.62
  -2  11   9   99.24   12.53
   2  11   9   80.89   10.03
   2  11   9   79.67    9.14
  -2  11  10  241.69   19.24
   2  11  10  347.56   21.19
   2  11  10  343.94   18.33
  -2  11  10  254.54   23.95
   2 -11  10  363.91   13.31
   2  11  11  142.38   13.47
   2  11  11  139.66   11.98
   2 -11  11  137.02    8.09
  -2  11  11  139.12   18.87
  -2  11  11  148.90   15.54
   2 -11  12   27.09    3.97
  -2  11  12   33.42   11.13
   2  11  12   28.04    7.68
   2  11  12   20.30    4.84
  -2  11  12   49.31   10.48
  -2  11  13   28.80   10.54
   2  11  13   27.44    7.54
   2 -11  13   40.16    4.45
  -2 -11  13   20.80   11.20
   2  11  13   30.52    6.93
  -2  11  13   19.81    6.57
   2  11  14   11.98    6.94
   2  11  14   29.63    6.41
   2 -11  14   29.40    3.79
  -2 -11  14   59.88   17.60
  -2  11  14   45.53   10.35
   2 -11  14   37.47    8.76
  -2  11  14   41.99   13.07
   2 -11  15   64.79   10.02
   2 -11  15   77.68    5.46
  -2  11  15   66.28   12.14
  -2 -11  15   54.28   17.23
  -2  11  15  106.64   18.50
   2  11  15   80.29   10.27
   2  11  15   74.52   11.59
  -2  11  16  216.75   20.76
  -2  11  16  209.51   25.48
   2 -11  16  335.56   10.81
  -2 -11  16  202.83   26.92
   2 -11  16  297.82   19.47
   2  11  16  314.95   23.88
   2  11  16  388.18   21.23
   2 -11  17   32.63    3.65
  -2  11  17   66.15   12.77
   2  11  17   53.21   11.87
  -2 -11  17   63.24   19.84
   2  11  17   47.30    8.89
   2 -11  17   49.03    7.78
  -2  11  17   80.61   16.21
  -2  11  18   21.46   12.72
  -2  11  18   10.70    7.50
   2  11  18   17.95    5.80
  -2 -11  18   20.36   15.18
   2 -11  18   28.96    6.00
   2  11  18   34.18   10.83
  -2 -11  19   16.75   12.37
  -2  11  19   36.36   10.62
   2  11  19   32.36    9.89
  -2  11  19   31.81   12.35
   2 -11  19   13.81    4.30
   2  11  19   11.99    6.19
   2  11  20   68.30   13.36
  -2  11  20   48.32   11.77
  -2 -11  20   80.39   20.97
   2  11  20   76.22   10.85
  -2  11  20   31.18   13.15
  -2  11  21   22.44    9.00
  -2  11  21   -4.07    9.04
   2  11  21    5.95    6.20
   2  11  21    8.41    6.97
   2  11  22   15.73    9.55
  -2  11  22   28.37   10.41
   2  11  22   19.92    7.85
  -2 -11  22   20.63   16.97
  -2  11  22    5.75    8.76
   2  11  23    0.77    6.75
  -2 -11  23   19.14   17.54
  -2  11  23   14.74    8.41
   2  11  23   11.34    5.35
  -2  11  23   -3.02    8.72
   2  11  24   19.18    9.15
  -2 -11  24   23.88   17.40
   2  11  24   -2.43    6.07
  -2  11  24    6.46    8.62
  -2  11  24   -0.61   11.13
  -2  11  25   19.82   11.20
   2  11  25    5.01    9.46
  -2 -11  25  -17.41   15.90
   2  11  25    1.91    5.00
  -2  11  25    8.35   12.79
  -2  11  26   18.27   14.11
   2  11  26   17.74   11.18
   2  11  26   12.40    8.34
  -2  11  26   -1.23    9.23
  -2 -11  26   24.70   19.66
   2  11  27    2.80    6.56
  -2  11  27    2.01    8.03
   2  11  27   -1.86    8.60
  -2  11  27   10.99   15.73
  -2  11  28   48.28   13.29
  -2  11  28   29.24   13.46
  -2  11  29  -10.23   11.25
  -2  11  29   16.04   10.26
  -2  11  30    9.10   13.07
  -2  11  30   -6.81    9.49
  -2  11  31   46.70   14.90
  -2  11  31   28.57   15.00
  -2  11  32   24.17   13.57
  -2  11  32   11.76   15.33
  -2  11  33   -9.55   17.93
  -2 -12 -11  126.49   16.17
  -2 -12 -10  119.25   15.33
  -2 -12  -9  107.98   14.85
  -2 -12  -8  155.82   16.03
  -2  12  -7   82.92    9.73
  -2  12  -7   78.63    7.47
  -2 -12  -7   76.08   11.76
  -2  12  -6   77.74    9.70
  -2 -12  -6   84.44   11.85
  -2  12  -6   73.07    7.34
  -2  12  -5  306.45   18.72
  -2  12  -5  306.90   13.82
  -2 -12  -4  168.29   14.87
  -2  12  -4  183.69   14.68
  -2  12  -4  192.00   11.19
  -2  12  -3  182.08   15.08
  -2  12  -3  185.70   11.15
  -2 -12  -3  201.94   16.32
  -2 -12  -2   21.12    7.19
  -2  12  -2   17.63    4.20
  -2  12  -2   20.98    7.40
  -2 -12  -1   68.67    9.71
  -2  12  -1   70.05   10.86
  -2  12  -1   67.24    7.54
   2 -12  -1   76.51   10.58
  -2  12   0   45.07    8.72
  -2 -12   0   61.30    9.35
  -2  12   0   60.00    7.38
   2 -12   0   57.32    9.04
   2  12   0   49.52    7.02
  -2 -12   1   66.99   10.09
  -2  12   1   84.59   12.12
  -2  12   1   69.67    8.98
   2  12   1   66.90    8.62
   2 -12   1   73.15    9.26
  -2  12   2   23.46    5.89
  -2  12   2   34.72    8.84
  -2 -12   2   23.84    6.91
   2  12   2   16.53    4.92
   2 -12   2   14.75    5.04
   2 -12   3  180.24   13.31
   2  12   3  204.55   14.93
  -2  12   3  110.00   11.20
   2  12   3  197.41   13.18
  -2  12   3  132.63   16.73
   2  12   4  191.36   14.73
   2  12   4  184.25   12.88
   2 -12   4  186.14   12.70
  -2  12   5  196.95   19.07
   2 -12   5  266.87   14.93
   2  12   5  298.93   17.22
   2  12   5  271.46   16.08
  -2  12   5  194.84   15.68
  -2  12   6  126.52   12.91
   2  12   6   81.79    9.81
  -2  12   6  138.75   15.61
   2  12   6   79.74    9.43
   2 -12   6   74.01    7.76
   2  12   7   76.58    9.29
  -2  12   7   66.64   10.64
  -2  12   7   69.13   13.30
   2  12   7   83.66    9.38
   2 -12   7   77.15    7.90
   2 -12   8  148.16   10.42
  -2  12   8   98.58   16.66
   2  12   8  147.89   12.15
   2  12   8  135.90   12.36
  -2  12   8   83.11   10.98
  -2  12   9   85.58   11.81
   2  12   9  112.28   11.05
   2 -12   9  123.25    9.15
  -2  12   9   94.41   16.89
   2  12   9  104.03   11.40
   2  12  10  114.39   12.29
   2  12  10   99.73   10.62
   2 -12  10  121.46    8.66
  -2  12  11  172.31   16.25
   2  12  11  113.65   11.61
  -2  12  11  156.58   20.20
   2 -12  11  122.08    8.38
   2  12  11  127.79   13.99
  -2  12  12   30.56   11.09
  -2  12  12   30.01    9.27
   2  12  12   37.69    8.33
   2 -12  12   33.30    4.42
   2  12  12   34.56    6.44
  -2  12  13   22.55    7.82
   2  12  13   11.49    6.33
   2 -12  13   13.45    3.41
   2  12  13   13.75    5.62
  -2  12  13   16.11   10.32
   2  12  14   59.23   10.54
   2 -12  14   53.28    5.56
  -2  12  14  123.55   19.04
  -2 -12  14   83.68   18.64
  -2  12  14   97.00   12.93
   2  12  14   49.21    8.78
   2  12  15   49.02   10.62
  -2 -12  15   38.61   12.81
   2 -12  15   44.53    4.97
  -2  12  15   66.53   16.79
   2 -12  15   72.19   11.41
   2  12  15   29.72    6.56
  -2  12  15   88.86   13.40
   2  12  16  133.46   16.24
  -2  12  16  123.79   20.16
   2 -12  16  118.30    7.24
  -2  12  16  131.40   16.04
   2 -12  16  127.29   14.64
  -2 -12  16  149.92   24.62
   2  12  16  121.62   12.77
   2  12  17    8.33    4.56
   2  12  17   21.16    9.44
   2 -12  17    8.11    5.68
  -2 -12  17   11.69   13.33
   2 -12  17   11.09    2.72
  -2  12  17   -2.10    9.07
  -2  12  17   23.27    9.62
   2  12  18   37.23    9.94
   2 -12  18   25.22    6.31
   2  12  18   36.05    7.80
  -2  12  18   52.09   13.57
  -2 -12  18   40.11   15.99
  -2  12  18   45.98   11.83
  -2  12  19  123.09   16.84
   2  12  19   72.16   14.20
   2  12  19   77.84   10.81
  -2 -12  19   71.98   19.52
  -2  12  19   81.92   17.17
  -2  12  20   39.76   14.61
  -2 -12  20   33.93   17.98
  -2  12  20   47.95   11.24
   2  12  20   47.93   12.52
   2  12  20   61.95   10.36
  -2  12  21    1.68   10.41
   2  12  21   20.21   10.15
   2  12  21   13.85    6.99
  -2  12  21   -8.48    8.64
  -2 -12  21    9.14   14.46
  -2 -12  22   61.06   21.62
  -2  12  22   50.93   12.76
   2  12  22   69.49   11.54
  -2  12  22   52.69   15.77
   2  12  22   66.07   16.66
  -2  12  23   14.35   10.32
   2  12  23   29.34   12.46
   2  12  23   -0.75    5.33
  -2  12  23    1.48   10.47
  -2 -12  23   28.44   17.99
   2  12  24   15.28    8.15
  -2  12  24   12.33    7.29
  -2 -12  24   37.97   18.73
  -2  12  24   43.08   16.60
   2  12  24   15.99   12.24
  -2  12  25   13.78   11.71
  -2  12  25   22.42    9.95
   2  12  25   10.78    9.88
   2  12  25   14.87    6.71
  -2  12  26   31.42   17.39
  -2  12  26   21.23   10.62
   2  12  26   21.61    8.02
   2  12  26    6.26    9.68
  -2  12  27    3.16   11.48
  -2  12  27   26.75   11.66
   2  12  27    8.67    6.26
   2  12  27   16.66   12.37
  -2  12  28   13.15    9.10
  -2  12  28   23.79   13.12
  -2  12  29   -4.72    7.83
  -2  12  29   -2.68   10.69
  -2  12  30   -6.34   14.02
  -2  12  30  -16.49   10.38
  -2  12  31   30.59   12.47
  -2  12  31   -4.19   14.67
  -2  12  32   23.11   12.05
  -2  12  32   21.07   18.09
  -2 -13  -8  167.75   17.78
  -2  13  -7   69.33    7.64
  -2 -13  -7   63.88   11.84
  -2  13  -7   64.80    9.32
  -2  13  -6   29.58    5.64
  -2 -13  -6   30.41    8.58
  -2  13  -6   34.18    7.90
  -2  13  -5  139.38    9.81
  -2 -13  -5  159.00   15.85
  -2  13  -5  163.69   14.49
  -2 -13  -4   24.81    7.49
  -2  13  -4   42.86    9.11
  -2  13  -4   31.42    5.37
  -2  13  -3  382.36   16.42
  -2 -13  -3  388.18   24.51
  -2  13  -2    8.76    3.68
  -2 -13  -2    4.10    4.32
  -2  13  -2   15.47    6.74
  -2  13  -1  401.06   23.92
  -2 -13  -1  402.60   22.77
  -2  13   0  194.70   17.32
  -2  13   0  193.42   12.92
   2  13   0  185.35   13.44
  -2  13   1  473.56   26.86
  -2  13   1  498.58   21.11
   2 -13   1  367.69   20.69
   2  13   1  386.59   18.96
  -2  13   2   16.62    7.14
   2  13   2    3.22    3.57
  -2  13   2   15.96    5.06
   2 -13   2    7.94    4.33
   2  13   3  334.12   19.43
   2  13   3  349.57   17.98
  -2  13   3  235.76   15.77
  -2  13   3  247.20   20.67
   2 -13   3  324.26   18.05
  -2  13   4   47.58   10.61
   2 -13   4   35.66    6.92
  -2  13   4   42.34    7.90
   2  13   4   17.36    5.21
   2  13   4   23.96    7.12
  -2  13   5  113.04   11.84
  -2  13   5  118.59   14.88
   2  13   5  129.38   11.94
   2  13   5  141.06   12.78
   2 -13   5  140.13   11.68
  -2  13   6   45.29   10.31
   2 -13   6   25.71    5.71
   2  13   6   45.33    8.97
   2  13   6   29.24    7.00
  -2  13   6   56.17    9.46
   2  13   7   76.86    9.67
   2 -13   7   77.26    8.51
  -2  13   7   97.59   15.04
   2  13   7   66.82    8.68
  -2  13   7   96.21   11.40
  -2  13   8  208.35   21.52
   2  13   8  178.02   14.14
   2  13   8  170.02   14.28
   2 -13   8  171.20   11.83
   2  13   9  110.24   12.20
   2  13   9  124.85   11.53
   2 -13   9  126.96    9.73
  -2  13   9   94.66   12.27
  -2  13   9  106.78   16.79
  -2  13  10  196.51   22.69
   2  13  10  307.24   19.82
   2  13  10  295.65   18.61
   2 -13  10  330.54   14.99
  -2  13  10  188.81   17.26
   2  13  11    5.92    4.15
  -2  13  11   -1.52    5.04
   2  13  11    5.93    4.97
   2 -13  11    7.94    3.02
  -2  13  11    0.63    7.71
   2  13  12   62.49    8.86
  -2  13  12   49.90   14.10
   2  13  12   69.73   11.79
   2 -13  12   64.17    6.44
  -2  13  12   40.90    9.28
  -2  13  13    9.64    7.44
   2 -13  13    2.44    2.43
   2  13  13    5.07    4.67
  -2  13  13    8.14    8.71
   2  13  13   -0.19    5.99
  -2  13  14   63.91   15.39
   2  13  14   84.90   12.51
   2 -13  14  110.92    7.94
   2  13  14  118.35   12.43
  -2  13  14   54.40   11.22
  -2  13  15    4.50    6.87
   2  13  15    5.75    5.35
   2 -13  15    8.91    3.23
   2 -13  15   10.85    7.58
   2  13  15    2.82    4.61
  -2  13  15   10.99    8.52
   2  13  16   93.04   13.87
   2  13  16   95.64   12.01
  -2  13  16   77.74   15.75
   2 -13  16   97.31    7.25
  -2 -13  16   65.32   18.90
  -2  13  16   72.56   12.84
   2 -13  16   68.09   11.22
  -2  13  17  105.92   19.15
   2  13  17   84.56   13.70
   2  13  17   81.01   12.02
   2 -13  17   88.51   13.51
  -2 -13  17  103.21   20.83
  -2  13  17  118.83   16.21
   2  13  18   78.75   14.09
   2  13  18   73.97   10.97
  -2  13  18   90.95   18.20
   2 -13  18   69.58   11.37
  -2 -13  18   78.70   21.02
  -2  13  18   88.74   14.98
   2  13  19  231.98   19.13
   2  13  19  211.20   21.19
  -2 -13  19  149.27   26.50
  -2  13  19  131.63   22.87
  -2  13  19  136.49   18.19
  -2 -13  20   44.90   17.37
   2  13  20   33.92    8.90
  -2  13  20   34.04   10.58
  -2  13  20   32.47   13.48
   2  13  20   36.73   10.66
   2  13  21   24.31   10.80
  -2  13  21   27.55   10.34
   2  13  21   38.05    9.16
  -2 -13  21   51.26   19.49
  -2  13  21   28.17   15.31
  -2  13  22   -6.43    8.75
   2  13  22   22.39   11.49
   2  13  22    6.47    6.40
  -2  13  22   -3.75    7.44
  -2 -13  22   23.82   16.25
   2  13  23   89.76   17.72
   2  13  23  113.84   14.82
  -2 -13  23  183.99   31.60
  -2  13  23  152.44   24.93
  -2  13  23  160.79   20.87
  -2  13  24   41.16   15.48
  -2  13  24   65.56   13.87
   2  13  24   51.11   11.60
   2  13  24   43.76   13.50
  -2  13  25   26.31   15.77
   2  13  25    2.77    6.64
  -2  13  25   -5.59    8.84
  -2 -13  25   12.84   14.99
   2  13  25    1.26    9.47
  -2  13  26   15.97   10.02
  -2  13  26   15.64   13.62
   2  13  26   10.74    7.84
   2  13  26    2.39    8.87
  -2  13  27    4.32    7.94
   2  13  27    2.91    6.03
  -2  13  27   -0.80   11.13
  -2  13  28   24.24   12.22
   2  13  28   28.68   10.55
  -2  13  28   27.75   16.29
  -2  13  29   35.26   14.06
  -2  13  29    4.64   12.08
  -2  13  30   11.87   15.39
  -2  13  30    7.50   10.18
  -2  13  31   -2.30   13.15
  -2  13  31    2.69    9.81
  -2  13  32    3.52   10.91
  -2  13  32  -15.30   15.03
  -2  14  -7   84.61    8.49
  -2  14  -7   80.06   10.52
  -2  14  -6   10.07    3.74
  -2  14  -6   20.68    7.15
  -2  14  -5  554.72   20.01
  -2  14  -5  567.98   27.49
  -2  14  -4  290.78   14.91
  -2  14  -4  291.57   20.14
  -2  14  -3  652.12   22.60
  -2  14  -3  685.03   30.64
  -2  14  -2  270.19   19.90
  -2  14  -2  227.41   13.98
   2  14  -1   32.91    6.90
  -2  14  -1   25.14    5.79
  -2  14  -1   22.01    8.21
  -2  14   0   48.09    9.63
   2  14   0   45.64    7.80
  -2  14   0   51.35    7.68
  -2  14   1   25.27    7.67
  -2  14   1   37.75    6.68
   2  14   1   25.17    6.50
  -2  14   2  167.00   17.08
  -2  14   2  160.10   12.97
   2  14   3  607.87   27.09
  -2  14   3  619.89   31.70
  -2  14   3  636.36   26.14
   2 -14   3  688.65   26.90
   2  14   3  715.49   27.57
   2  14   4  317.06   19.57
  -2  14   4  224.70   16.57
   2  14   4  286.74   17.54
   2 -14   4  276.77   17.37
  -2  14   4  254.00   22.25
   2 -14   5  594.54   24.69
  -2  14   5  591.14   36.79
   2  14   5  492.80   24.32
   2  14   5  541.65   23.98
  -2  14   5  471.61   23.58
  -2  14   6   10.92    8.51
  -2  14   6   14.18    6.36
   2 -14   6    8.87    4.29
   2  14   6    4.71    4.75
   2  14   6    3.67    4.89
  -2  14   7   47.98   11.99
   2  14   7   87.45   10.94
   2 -14   7   82.03    9.07
   2  14   7   96.02   11.45
  -2  14   7   38.14    8.56
  -2  14   8   66.85   13.63
  -2  14   8   47.00    8.87
   2 -14   8   82.35    9.00
   2  14   8   76.87   10.38
   2  14   8   87.59   10.57
  -2  14   9  104.42   16.14
   2  14   9  153.33   14.52
   2 -14   9  152.78   11.29
   2  14   9  132.00   12.85
  -2  14   9  116.27   13.46
   2  14  10   98.31   11.55
   2  14  10   69.88   10.68
  -2  14  10   69.66   14.48
   2 -14  10   99.05    9.30
  -2  14  10   64.53   10.89
  -2  14  11  146.15   20.83
  -2  14  11  138.29   15.59
   2  14  11  158.29   15.10
   2  14  11  160.52   14.78
   2 -14  11  188.84   12.00
  -2  14  12   75.19   15.71
   2 -14  12   69.97    7.28
  -2  14  12   65.97   11.27
   2  14  12   71.80   10.10
   2  14  12   73.31   11.29
  -2  14  13   44.48    9.62
   2  14  13   45.73   10.25
   2 -14  13   32.34    5.04
   2  14  13   32.98    6.77
   2 -14  14   69.23    6.90
  -2  14  14   69.35   15.75
   2  14  14   75.06   10.34
  -2  14  14   53.92   10.13
   2  14  14   61.42   11.75
   2  14  15    7.79    6.13
  -2  14  15    6.65    6.54
  -2  14  15    1.00    8.29
   2  14  15   12.82    6.01
   2 -14  15    8.55    3.55
   2  14  16   19.33    8.82
  -2  14  16   26.09    8.83
  -2  14  16   30.04   13.05
  -2 -14  16   -6.37   13.07
   2 -14  16   24.90    9.58
   2  14  16   10.11    6.14
  -2  14  17   79.85   13.43
   2  14  17   53.13   11.23
  -2 -14  17   26.37   15.71
   2 -14  17   95.32   16.11
  -2  14  17   85.28   18.04
   2  14  17   53.78    9.36
   2  14  18  247.32   19.88
  -2  14  18  249.92   30.07
  -2 -14  18  211.84   31.97
  -2  14  18  250.18   23.12
   2 -14  18  276.05   22.50
   2  14  18  257.09   23.03
   2  14  19    5.11    5.49
  -2 -14  19   15.13   13.43
  -2  14  19    9.35    8.29
   2  14  19   11.88    9.70
  -2  14  19   -3.30    9.95
  -2  14  20    1.25    7.46
   2  14  20   -1.68    5.21
  -2  14  20    1.72   10.35
   2  14  20  -11.69    8.66
   2  14  21   13.78    9.46
  -2 -14  21   -3.79   14.61
  -2  14  21   23.69   10.39
   2  14  21   21.72    8.31
  -2  14  21   15.05   10.41
  -2 -14  22   18.10   16.40
  -2  14  22    6.32    6.89
   2  14  22   23.13    8.43
   2  14  22   29.28   10.05
   2  14  23   -1.85    8.80
  -2  14  23   -2.26   11.53
  -2  14  23   18.18    8.88
   2  14  23   15.48    8.09
  -2 -14  24   31.08   21.56
  -2  14  24   33.32   11.52
   2  14  24   29.07   10.34
  -2  14  24   29.90   15.52
  -2  14  25   37.14   15.32
   2  14  25   20.71   11.65
   2  14  25    7.67    7.10
  -2  14  25   15.88    8.98
  -2  14  26  117.77   23.10
   2  14  26   92.92   14.73
   2  14  26   71.93   17.53
   2  14  27    1.76    6.22
  -2  14  27    5.12    7.88
  -2  14  27    8.36   11.44
  -2  14  28   63.82   15.64
   2  14  28   18.13    8.79
  -2  14  28   61.24   20.81
  -2  14  29    4.58   12.02
  -2  14  29   35.52   12.65
  -2  14  30   25.33   13.39
  -2  14  30   18.17   17.78
  -2  14  31   21.01   16.67
  -2  14  31   18.51   10.46
  -2  14  32    1.81   10.46
  -2  14  32  -15.45   18.21
  -2  15  -8   41.57    8.61
  -2  15  -7   26.64    5.21
  -2  15  -7   29.32    7.38
  -2  15  -6   49.79    6.65
  -2  15  -6   26.31    6.69
  -2  15  -5  396.17   23.73
  -2  15  -5  382.86   17.79
  -2  15  -4  254.39   15.50
  -2  15  -4  286.36   21.34
  -2  15  -3   14.54    6.60
  -2  15  -3   12.54    5.20
  -2  15  -2  176.16   12.80
  -2  15  -2  172.64   16.37
  -2  15  -1  100.64   13.55
   2  15  -1   77.72    9.45
  -2  15  -1   80.71    9.10
   2  15   0   66.17    9.16
  -2  15   0   68.38   11.99
  -2  15   0   81.56    9.30
  -2  15   1   80.96   12.62
   2  15   1  102.57   11.35
  -2  15   1   77.42    9.56
   2  15   2  156.06   13.32
  -2  15   2  160.43   17.15
  -2  15   2  150.50   13.00
   2  15   3   10.17    6.56
   2  15   3    2.81    3.70
  -2  15   3   11.47    5.27
  -2  15   3    3.29    5.12
  -2  15   4  390.52   26.76
   2  15   4  330.41   19.18
   2  15   4  328.74   21.09
  -2  15   4  402.09   21.54
  -2  15   5  387.94   22.31
  -2  15   5  404.19   29.34
   2  15   5  389.08   22.74
   2  15   5  397.27   21.52
  -2  15   6   32.16   10.85
   2  15   6   44.37    8.06
  -2  15   6   25.66    7.44
   2  15   6   41.82    8.10
   2 -15   6   40.02    6.93
  -2  15   7   21.43    6.40
   2  15   7   22.93    7.15
  -2  15   7   17.91    9.49
   2 -15   7   25.77    5.71
   2  15   7   27.70    6.36
   2 -15   8   31.74    5.97
  -2  15   8   36.60   11.53
   2  15   8   29.25    7.20
   2  15   8   30.25    7.33
  -2  15   8   26.77    7.56
   2  15   9   10.60    5.59
  -2  15   9   -3.02    4.63
   2  15   9   11.76    4.94
   2 -15   9    8.98    4.66
  -2  15   9    1.86    7.36
  -2  15  10    4.42    7.10
   2  15  10   22.92    7.41
  -2  15  10    6.74    5.82
   2  15  10   13.18    5.11
   2 -15  10   27.34    5.38
   2 -15  11  105.02   10.08
   2  15  11  103.81   13.69
   2  15  11  109.42   12.42
  -2  15  11  138.68   19.70
  -2  15  12   82.47   17.15
   2  15  12   72.36   10.42
   2 -15  12   93.08    9.22
   2  15  12  105.52   13.40
  -2  15  12   51.10   10.88
   2  15  13   75.72   12.21
  -2  15  13  118.36   19.12
   2  15  13   75.80   11.21
   2 -15  13   91.15    8.91
  -2  15  13  141.42   15.99
  -2  15  14   25.79   11.34
   2  15  14   60.36   11.85
  -2  15  14   53.62   10.65
   2 -15  14   15.03    4.05
   2  15  14   21.71    7.15
   2  15  15  294.96   24.14
   2  15  15  257.62   19.26
  -2  15  15  269.13   22.32
  -2  15  15  273.24   29.51
  -2  15  16   43.27    9.92
   2  15  16   27.31    9.31
   2 -15  16   33.39   11.48
  -2 -15  16   63.40   21.58
  -2  15  16   55.07   15.97
   2  15  16   26.41    7.81
  -2  15  17   65.38   16.43
   2  15  17   40.13   10.59
   2 -15  17   46.99   14.65
  -2 -15  17   38.11   17.12
   2  15  17   35.33    9.74
  -2  15  17   42.95    9.56
   2  15  18  149.55   18.28
  -2 -15  18  165.74   29.46
  -2  15  18  166.33   26.05
  -2  15  18  170.10   19.84
   2  15  18  140.55   15.42
  -2  15  19   28.69   15.60
  -2  15  19   20.82    8.92
   2  15  19   30.70    9.65
  -2 -15  19   14.31   13.27
   2  15  19   50.73   10.10
  -2  15  20   51.41   11.88
   2  15  20   34.81   10.53
  -2  15  20   30.26   12.81
   2  15  20   41.39    8.96
  -2 -15  20   33.08   18.35
  -2  15  21   11.01    7.42
  -2  15  21  -16.66   13.95
   2  15  21    5.38    6.14
   2  15  21   12.52    8.97
  -2 -15  21   22.03   17.37
  -2  15  22   67.55   13.84
   2  15  22   81.03   15.99
   2  15  22   47.10   10.47
  -2 -15  22   54.03   21.35
  -2  15  22   42.39   12.85
   2  15  23   23.11    8.92
   2  15  23   12.29    8.71
  -2  15  23    7.69    7.07
  -2  15  23   30.27   15.56
  -2 -15  23   -6.49   17.70
   2  15  24   18.73    9.65
   2  15  24   14.71    7.80
  -2  15  24    9.29    8.59
  -2  15  24   13.20   14.34
  -2 -15  24    0.03   14.82
  -2  15  25   31.62   15.41
   2  15  25   21.58    9.06
  -2  15  25   27.67   11.12
   2  15  25   22.06   11.06
  -2  15  26   95.58   16.76
   2  15  26   73.39   13.61
  -2  15  26   84.40   23.93
  -2  15  27   10.09   11.91
   2  15  27   -3.58    7.62
  -2  15  27    5.22    7.68
  -2  15  28   26.87   11.48
  -2  15  28   23.82   19.66
   2  15  28   18.86    8.88
  -2  15  29   25.69   13.38
  -2  15  29    0.07   13.54
  -2  15  30    2.00   12.21
  -2  15  30   -4.33    8.48
  -2  15  31   -0.53   12.71
  -2  15  31   21.32   12.19
  -2  15  32   25.81   12.87
  -2  16  -8   80.23   12.18
  -2  16  -7   -0.56    3.82
  -2  16  -7    4.53    4.79
  -2  16  -6   91.22    9.62
  -2  16  -6   82.81   12.07
  -2  16  -5   13.44    6.29
  -2  16  -5    1.16    3.30
  -2  16  -4   64.31   10.88
  -2  16  -4   89.87    9.66
  -2  16  -3   54.62    7.51
  -2  16  -3   62.17   10.63
  -2  16  -2   35.43    6.72
  -2  16  -2   42.32    9.46
  -2  16  -1   81.84   12.07
   2  16  -1   78.76   10.00
  -2  16  -1   92.00   10.05
  -2  16   0   67.57   11.71
  -2  16   0   75.77    9.10
   2  16   0   68.83    9.67
   2  16   1  100.35   11.57
  -2  16   1   95.36   14.15
  -2  16   1   80.23    9.62
  -2  16   2   54.58   11.18
  -2  16   2   54.66    7.93
   2  16   2   36.64    7.38
   2  16   3   51.95    8.70
  -2  16   3   50.95   11.33
  -2  16   3   51.08    8.59
   2  16   3   42.63    8.86
  -2  16   4   75.96   10.51
   2  16   4   90.15   11.39
  -2  16   4   83.20   13.99
   2  16   4   90.94   11.93
   2  16   5    3.76    5.11
  -2  16   5   -3.28    5.93
  -2  16   5   -5.72    3.81
   2  16   5   -2.28    3.96
   2  16   6   99.49   12.02
  -2  16   6   71.73   13.23
  -2  16   6   60.59   10.06
   2  16   6   78.60   11.09
   2  16   7    7.98    5.43
   2  16   7    1.75    4.08
  -2  16   7    2.96    6.60
  -2  16   7    6.28    5.32
   2  16   8   68.85    9.98
   2  16   8   72.14   11.74
  -2  16   8   91.11   15.58
   2  16   9    2.49    3.92
   2  16   9   -5.05    4.71
   2 -16   9   -0.89    4.40
  -2  16   9   10.12    8.13
  -2  16   9    4.20    4.29
  -2  16  10    5.14    6.83
   2 -16  10   22.82    5.50
   2  16  10   18.69    7.34
  -2  16  10    5.90    4.98
   2  16  10   20.76    6.26
  -2  16  11   83.72   11.84
   2  16  11   55.22   10.56
   2  16  11   37.06    8.50
  -2  16  11   82.14   15.20
   2 -16  11   45.69    7.40
  -2  16  12    3.37    8.14
   2  16  12    4.37    5.19
   2 -16  12   11.54    4.96
   2  16  12    6.29    6.24
  -2  16  12   12.07    5.15
   2  16  13    4.16    7.09
   2  16  13    0.07    4.76
   2 -16  13    8.30    4.45
  -2  16  13    4.22    5.48
  -2  16  13   -0.61    9.18
  -2  16  14  193.35   19.12
  -2  16  14  178.38   23.64
   2  16  14  229.07   19.00
   2  16  14  227.36   20.83
   2 -16  14  239.62   14.59
   2  16  15   12.02    5.67
  -2  16  15   30.88   10.81
   2  16  15   25.19    9.76
  -2  16  15   30.41   10.61
   2  16  16   87.88   12.58
  -2  16  16   64.27   11.73
  -2  16  16   91.50   19.44
  -2  16  17   42.07   12.50
  -2  16  17   35.98   10.19
  -2 -16  17   63.90   19.70
   2 -16  17   53.55   14.54
   2  16  17   42.49   10.97
   2  16  17   24.65    7.67
  -2  16  18   21.83   10.20
  -2  16  18   12.26    6.77
   2  16  18    1.62    4.73
   2  16  18    0.61    6.44
  -2 -16  18    6.85   14.26
  -2  16  19   -6.56    9.97
   2  16  19   13.86    8.99
  -2  16  19   13.19    7.70
  -2 -16  19   11.60   16.76
   2  16  19    6.90    6.32
  -2  16  20    8.78   10.27
   2  16  20    3.22    6.83
  -2  16  20   14.29    8.46
   2  16  20    5.18    6.70
  -2  16  21   35.44   16.80
   2  16  21   11.03    7.30
   2  16  21   11.89    6.94
  -2  16  21   -1.80    6.69
  -2 -16  21   11.00   16.99
  -2  16  22   19.34   10.82
   2  16  22    2.78    6.83
  -2  16  22   36.76   11.02
   2  16  22    7.62    8.18
  -2 -16  22   23.76   18.54
  -2  16  23   32.11   18.19
  -2  16  23    8.69    7.69
   2  16  23   24.42    8.67
  -2 -16  23   11.86   15.69
   2  16  23   25.96   11.26
   2  16  24   -2.97    6.89
   2  16  24    1.70    8.70
  -2  16  24    1.86    9.06
  -2  16  24    7.60   11.33
  -2  16  25   28.78   14.53
   2  16  25   32.52   12.91
   2  16  25   24.29   10.01
  -2  16  25   46.63   13.48
  -2  16  26   21.43   17.13
  -2  16  26   18.65   10.13
   2  16  26   11.38    8.92
  -2  16  27   12.32   15.99
  -2  16  27    5.14    9.91
   2  16  27    3.75    7.06
   2  16  28   19.05   10.46
  -2  16  28   11.79   14.90
  -2  16  28   -4.09    8.70
  -2  16  29   11.50   18.86
  -2  16  29   15.12   11.63
  -2  16  30   -4.30   14.01
  -2  16  30   15.41   10.00
  -2  16  31    8.09   15.45
  -2  16  31    7.59    9.45
  -2  17  -8   76.58   11.54
  -2  17  -7   14.83    6.58
  -2  17  -7   10.54    4.73
  -2  17  -6   84.56   10.12
  -2  17  -6   77.17   11.90
  -2  17  -5   10.68    4.70
  -2  17  -5   -0.56    5.16
  -2  17  -4  116.27   14.02
  -2  17  -4  115.25   11.15
  -2  17  -3   63.91   12.03
  -2  17  -3   57.57    8.43
  -2  17  -2   88.24    9.87
  -2  17  -2   59.98   10.52
  -2  17  -1   23.83    5.81
   2  17  -1    8.52    4.88
  -2  17  -1   22.46    7.62
  -2  17   0   -4.28    5.22
  -2  17   0   -0.01    3.49
   2  17   0    3.19    4.76
  -2  17   1   14.90    4.89
  -2  17   1    6.09    6.27
   2  17   1   20.20    5.56
   2  17   2   83.11   11.26
  -2  17   2   77.44   13.24
  -2  17   2  108.31   11.58
  -2  17   3   83.59   13.35
   2  17   3   66.61    9.95
  -2  17   3  100.46   11.36
  -2  17   4  177.20   18.64
   2  17   4  100.20   13.15
  -2  17   4  185.98   15.31
   2  17   4  125.05   13.16
  -2  17   5   12.24    4.99
  -2  17   5   -2.27    5.66
   2  17   5    5.95    4.19
   2  17   5   10.12    4.91
   2  17   6   89.92   12.64
  -2  17   6   84.56   14.39
  -2  17   6   64.39   10.38
   2  17   6   79.28   10.65
   2  17   7    3.07    5.60
  -2  17   7   12.48    8.04
   2  17   7   -1.55    5.23
  -2  17   7    5.08    4.62
  -2  17   8   55.43   13.41
  -2  17   8   58.77   10.80
   2  17   8   59.23    9.99
   2  17   8   59.70   10.46
  -2  17   9    0.92    5.16
  -2  17   9    6.73    8.21
   2  17   9   14.12    6.48
   2  17   9    2.33    5.69
  -2  17  10   -0.67    4.72
  -2  17  10   -6.56    8.09
   2  17  10    7.51    5.21
   2  17  10    1.00    5.79
  -2  17  11   -1.82    6.25
   2  17  11    2.43    5.09
  -2  17  11    0.06    4.78
   2  17  11   11.64    5.93
   2  17  12   33.72    9.20
  -2  17  12   27.40   10.34
   2  17  12   25.17    7.81
  -2  17  12   38.59    8.94
   2  17  13   86.47   13.15
  -2  17  13   61.07   11.64
  -2  17  13   62.42   15.06
   2  17  14   20.82    9.61
  -2  17  14    5.21    6.15
   2  17  14   19.15    7.53
  -2  17  14   10.44    9.34
   2  17  15    8.26    6.17
  -2  17  15   14.07   10.99
  -2  17  15    5.61    6.30
   2  17  15   24.73    8.44
   2  17  16  105.86   15.16
   2  17  16  134.03   15.45
  -2  17  16   65.22   12.92
  -2  17  16   92.81   18.76
   2  17  17   78.47   14.80
  -2  17  17   88.26   19.38
  -2  17  17   72.78   12.56
   2  17  17   49.35    9.91
  -2  17  18   56.99   12.69
   2  17  18   39.39    9.77
  -2  17  18   36.50   14.22
   2  17  18   29.56   12.23
  -2 -17  18   29.06   21.23
   2  17  19   70.52   12.64
   2  17  19   62.37   13.29
  -2  17  19   92.99   14.53
  -2 -17  19   52.28   22.34
  -2  17  19  103.27   20.80
  -2  17  20   42.77   16.72
   2  17  20   33.80   10.58
  -2  17  20   47.81   11.69
   2  17  20   36.63   12.37
  -2 -17  20   38.14   17.55
  -2 -17  21    2.74   15.00
  -2  17  21   18.26   14.29
   2  17  21    6.94    5.76
  -2  17  21    0.76    6.45
   2  17  21   15.00    8.21
  -2  17  22   -5.14    7.75
   2  17  22   -0.07    8.12
  -2 -17  22    5.22   16.13
  -2  17  22   18.74   12.42
   2  17  22   -9.72    6.40
   2  17  23   16.20    8.85
   2  17  23   -4.06    8.19
  -2 -17  23   10.39   18.13
  -2  17  23    8.98   12.32
  -2  17  23   13.37    9.16
   2  17  24   12.66    9.21
  -2  17  24   -0.11    7.09
  -2  17  24   -8.67   12.32
   2  17  24    9.83    7.65
  -2  17  25   25.90    9.16
  -2  17  25   15.62   15.06
   2  17  25   -2.63    6.53
  -2  17  26    6.92    8.86
  -2  17  26    5.94   12.51
   2  17  26   -5.25    9.13
  -2  17  27   11.80   14.51
  -2  17  27   31.27   12.69
   2  17  27   15.62    9.58
  -2  17  28   17.13   13.25
  -2  17  28   15.19    9.86
   2  17  28   18.47   10.91
  -2  17  29   -5.45   13.89
  -2  17  29   -0.54    8.59
  -2  17  30    8.61   12.90
  -2  17  30    6.43   10.03
  -2  18  -8   27.57    7.15
  -2  18  -7   37.42    9.05
  -2  18  -6   21.24    7.60
  -2  18  -6   30.83    7.54
  -2  18  -5   38.03   10.58
  -2  18  -5   35.66    7.48
  -2  18  -4    7.09    7.27
  -2  18  -4    0.08    4.06
  -2  18  -3   14.17    5.03
  -2  18  -3    0.40    6.27
  -2  18  -2    6.62    4.50
  -2  18  -2    5.05    5.26
   2  18  -1   47.64    9.07
  -2  18  -1   32.37    8.69
  -2  18  -1   24.81    6.30
  -2  18   0   95.06   14.67
   2  18   0   90.26   11.55
  -2  18   0  101.16   11.26
  -2  18   1   52.01   12.02
  -2  18   1   42.21    7.55
   2  18   1   19.98    6.26
  -2  18   2    9.07    5.40
  -2  18   2    9.49    7.03
   2  18   2    2.28    5.89
  -2  18   3   17.46    7.89
  -2  18   3   24.70    6.61
   2  18   3    9.71    4.70
   2  18   3   13.99    6.50
  -2  18   4    3.33    3.83
  -2  18   4   11.89    7.01
   2  18   4    2.39    5.51
   2  18   4   -1.17    4.65
  -2  18   5   40.72   10.23
   2  18   5   36.52    8.23
   2  18   5   25.38    7.40
  -2  18   5   44.90    9.29
  -2  18   6   38.36   11.12
   2  18   6   42.95    8.75
   2  18   6   25.95    8.01
  -2  18   6   30.55    7.54
   2  18   7   22.11    7.50
  -2  18   7   25.94    7.68
  -2  18   7   23.10   10.88
   2  18   7   44.38    8.18
  -2  18   8   26.19   10.08
   2  18   8   40.10    9.26
   2  18   8   28.35    7.56
  -2  18   8   40.63    8.60
   2  18   9   -1.06    5.82
   2  18   9    8.94    8.30
  -2  18   9    5.85    5.88
  -2  18   9   10.70    8.63
   2  18  10   28.34    8.36
  -2  18  10   62.55   10.14
   2  18  10   37.03    8.98
  -2  18  10   36.81   12.58
  -2  18  11   61.96   15.52
   2  18  11   75.15   11.00
  -2  18  11   48.83   10.39
   2  18  11   82.05   12.25
   2  18  12   15.66    8.77
  -2  18  12   26.42    8.20
   2  18  12   12.09    6.28
  -2  18  12    1.87    8.36
   2  18  13   40.40   10.30
  -2  18  13   25.08    9.17
  -2  18  13   18.06   11.18
   2  18  14   20.89    8.99
   2  18  14   20.05    6.22
  -2  18  14   20.49    8.68
  -2  18  14   34.30   13.28
   2  18  15   71.43   12.73
  -2  18  15   64.94   15.60
  -2  18  15   52.32   12.06
   2  18  16   26.87    9.20
  -2  18  16    7.87    8.32
  -2  18  16   33.21   13.59
   2  18  16   18.23    9.16
  -2  18  17   12.90    9.57
   2  18  17   -4.38    5.76
   2  18  17    7.47    6.26
  -2  18  17   11.43    7.85
  -2  18  18    6.94    8.26
   2  18  18    8.16    6.03
  -2  18  18   16.52   11.51
   2  18  18    1.38    6.56
   2  18  19    0.60    6.59
   2  18  19   13.15    9.97
  -2 -18  19  -20.40   19.04
  -2  18  19   15.83    8.99
  -2  18  19    5.18   12.05
  -2  18  20   35.60   15.57
   2  18  20   12.12    8.27
   2  18  20    6.05    6.88
  -2  18  20   14.25    8.69
  -2 -18  20  -12.31   14.39
   2  18  21    5.09    8.12
   2  18  21    6.87    9.08
  -2  18  21   -2.37    6.47
  -2  18  21   16.69   14.16
  -2 -18  21    0.72   16.04
   2  18  22   10.84   10.07
  -2 -18  22   12.12   18.29
  -2  18  22   22.43   14.11
   2  18  22   22.10    8.02
  -2  18  22   15.14    8.50
  -2  18  23  -13.65   13.37
  -2  18  23   -4.68    7.57
  -2 -18  23    9.61   19.24
   2  18  23    2.68    8.09
   2  18  23   21.79   13.10
   2  18  24   18.39   10.40
   2  18  24   12.38    8.45
  -2  18  24   20.01   13.01
  -2  18  24   28.56   11.64
   2  18  25   35.74   10.83
  -2  18  25   50.68   14.16
  -2  18  25   45.47   19.71
  -2  18  26   41.89   17.49
   2  18  26   22.36   11.20
  -2  18  26   24.54   12.30
  -2  18  27   36.09   18.48
  -2  18  27   28.79   11.03
   2  18  27    1.81    7.26
   2  18  28   15.57   10.25
  -2  18  28   -5.57   14.71
  -2  18  28   -2.34    8.99
  -2  18  29   -3.68   14.26
  -2  18  29   19.95   10.82
  -2  19  -8  178.74   17.60
  -2  19  -7  146.14   16.08
  -2  19  -6   47.44   10.52
  -2  19  -6   29.96    6.67
  -2  19  -5   78.02   10.56
  -2  19  -5   85.05   13.67
  -2  19  -4    1.99    4.01
  -2  19  -4   11.42    7.62
  -2  19  -3   14.67    7.59
  -2  19  -3    9.87    4.37
  -2  19  -2  305.95   24.70
  -2  19  -2  267.51   18.28
  -2  19  -1    7.67    5.15
  -2  19  -1    7.92    6.18
   2  19  -1   15.92    6.76
  -2  19   0   -3.32    6.37
   2  19   0   -2.79    4.71
  -2  19   0   -0.76    4.12
  -2  19   1    7.74    6.86
  -2  19   1    4.25    3.88
   2  19   1    4.03    4.81
  -2  19   2  414.99   29.11
  -2  19   2  400.97   22.81
  -2  19   3    6.68    4.71
  -2  19   3    1.64    7.53
   2  19   3    1.07    5.71
   2  19   4    8.61    6.00
  -2  19   4   13.43   10.16
  -2  19   4    8.54    5.00
   2  19   4   -4.63    4.68
   2  19   5   78.22   11.99
   2  19   5   81.29   12.11
  -2  19   5   90.96   12.32
  -2  19   6   27.19    6.55
   2  19   6   36.04    8.78
  -2  19   6   46.47   11.73
   2  19   6   49.11   10.14
  -2  19   7  160.45   19.57
   2  19   7  157.69   16.20
   2  19   7  160.14   16.48
  -2  19   7  135.68   14.58
   2  19   8  172.06   16.80
   2  19   8  203.59   18.44
  -2  19   8  124.71   13.99
  -2  19   8  110.02   18.59
  -2  19   9   11.57    9.70
  -2  19   9   15.88    6.38
   2  19   9   10.93    6.66
   2  19   9    8.59    6.05
  -2  19  10  149.75   22.07
   2  19  10  190.05   18.13
  -2  19  10  125.59   15.79
   2  19  10  197.84   18.61
  -2  19  11   53.99   13.66
   2  19  11   34.27    8.79
   2  19  11   49.20   11.54
  -2  19  12   23.15   10.76
   2  19  12   58.09   11.61
  -2  19  12   31.26    9.48
   2  19  12   53.67    9.55
  -2  19  13   31.30   11.76
   2  19  13   22.44    9.17
   2  19  13   19.48    7.18
  -2  19  13   16.13    7.12
  -2  19  14   54.12   11.11
  -2  19  14   47.41   13.92
   2  19  14   71.14   13.12
   2  19  14   53.81   10.15
   2  19  15    7.38    7.83
   2  19  15    1.06    5.39
  -2  19  15    3.04    8.94
  -2  19  15   -0.50    7.06
   2  19  16   11.97    6.40
  -2  19  16   22.57    8.39
   2  19  16   12.99    7.82
  -2  19  16   10.41    8.64
   2  19  17   16.54    7.93
   2  19  17    9.14    6.77
  -2  19  17   11.91    6.72
  -2  19  17   -1.48   10.09
  -2  19  18   19.82    9.24
  -2  19  18   23.34   13.90
   2  19  18   13.75    6.62
  -2 -19  18   11.55   18.33
   2  19  18   39.48   10.75
  -2  19  19   19.74   12.84
   2  19  19   12.21    6.87
   2  19  19   -4.97    7.36
  -2  19  19    3.93    7.06
  -2 -19  19  -10.35   14.76
   2  19  20   -4.54    8.95
   2  19  20  -15.04    8.98
  -2  19  20   -1.69   11.40
  -2  19  20   11.50    7.88
  -2 -19  20   -8.28   15.19
  -2 -19  21   25.07   17.94
  -2  19  21   51.09   17.79
   2  19  21   19.09    8.96
   2  19  21   20.76   10.01
  -2  19  21   26.18   10.31
  -2 -19  22  -22.84   17.98
  -2  19  22    2.38    7.79
  -2  19  22   38.14   17.75
   2  19  22   21.78   11.22
   2  19  22   -2.30    8.57
   2  19  23  -12.85    8.94
   2  19  23   -4.04   10.18
  -2  19  23    2.93   10.11
  -2  19  23    8.51    8.49
   2  19  24   23.64    9.04
  -2  19  24    1.20    8.42
  -2  19  24   18.60   14.53
  -2  19  25   40.63   10.43
  -2  19  25   55.82   19.60
   2  19  25   37.97   12.29
  -2  19  26   19.75   15.26
   2  19  26    2.00    9.41
  -2  19  26   16.23    9.11
  -2  19  27    0.30    8.24
   2  19  27   -8.41    8.21
  -2  19  27    4.98   11.63
   2  19  28   33.22   12.77
  -2  19  28   21.40    8.93
  -2  19  28   26.95   15.35
  -2  19  29   32.61   17.96
  -2  20  -8   23.41    8.45
  -2  20  -7   34.39    9.53
  -2  20  -6   29.09    9.16
  -2  20  -6   26.75    7.09
  -2  20  -5   21.20    8.61
  -2  20  -5   29.77    7.90
  -2  20  -4   77.17   11.02
  -2  20  -4   70.43   12.34
  -2  20  -3   30.89    9.39
  -2  20  -3   19.63    6.50
  -2  20  -2   57.11    9.67
  -2  20  -2   69.96   12.75
  -2  20  -1   74.95   10.50
   2  20  -1   64.08   10.73
  -2  20  -1   72.30   13.31
  -2  20   0  265.84   18.92
  -2  20   0  236.48   22.13
   2  20   0  230.56   18.48
  -2  20   1   45.67    8.65
   2  20   1   69.55   11.25
  -2  20   1   46.45   11.28
   2  20   2   56.87   10.40
  -2  20   2   87.99   11.52
  -2  20   2   77.65   14.39
  -2  20   3   12.95    6.71
  -2  20   3   16.87    7.18
   2  20   3    8.34    5.04
  -2  20   4  138.18   18.71
   2  20   4   58.76   12.11
   2  20   4   69.87   11.10
  -2  20   4  125.06   14.01
   2  20   5   26.45    8.93
  -2  20   5   23.89    7.87
  -2  20   5   15.20    8.55
   2  20   5   31.42    8.69
  -2  20   6   45.92   11.74
  -2  20   6   32.97    8.34
   2  20   6   34.87    9.99
   2  20   6   35.00    9.47
   2  20   7   18.50    6.14
  -2  20   7   44.35   12.06
   2  20   7   28.17    8.75
  -2  20   7   24.04    7.35
  -2  20   8   37.18   12.75
   2  20   8   26.50    7.26
  -2  20   8   36.86    9.53
   2  20   8   33.33    9.41
   2  20   9   25.80    8.45
   2  20   9   19.39    8.68
  -2  20   9   45.46   11.00
  -2  20   9   51.05   13.79
  -2  20  10   49.59   13.87
   2  20  10   39.55    8.75
   2  20  10   53.53   10.28
  -2  20  10   66.39   11.62
  -2  20  11   74.81   17.22
  -2  20  11   58.91   11.09
   2  20  11   97.46   13.99
   2  20  11   84.54   13.63
   2  20  12   47.49   10.72
  -2  20  12   59.97   17.29
   2  20  12   35.75   10.12
  -2  20  12   23.71    8.06
   2  20  13   75.33   12.28
   2  20  13   77.59   12.69
  -2  20  13   54.84   16.53
  -2  20  13   52.43   11.74
  -2  20  14   55.89   14.52
   2  20  14   64.64   12.26
  -2  20  14   39.03   10.39
   2  20  14   67.96   12.46
  -2  20  15   33.33   16.48
   2  20  15   37.01   10.64
   2  20  15   45.09   10.41
  -2  20  15   26.94    9.47
  -2  20  16   30.16   13.86
  -2  20  16   21.19    7.89
   2  20  16   20.50    8.80
   2  20  16    3.82    5.63
   2  20  17   27.18    9.64
  -2  20  17   38.28   13.49
   2  20  17   35.87    9.93
  -2  20  17   11.71    6.72
   2  20  18    5.02    8.63
   2  20  18   10.40    6.25
  -2  20  18   18.51   12.03
  -2  20  18   13.34    6.37
  -2 -20  19   49.60   24.25
   2  20  19   36.07   11.72
   2  20  19   51.70   11.96
  -2  20  19   63.41   13.71
  -2  20  19   82.08   18.80
  -2  20  20   38.90   14.57
   2  20  20   46.81   11.40
   2  20  20   51.87   13.43
  -2 -20  20   14.03   16.04
  -2  20  20   20.94    8.83
   2  20  21    1.69    6.89
  -2  20  21  -16.02   12.14
  -2 -20  21  -13.74   18.77
  -2  20  21  -11.08    7.33
   2  20  21    2.40    6.63
   2  20  22   14.51    8.28
   2  20  22   28.59   10.67
  -2  20  22   28.64   13.88
  -2  20  22   13.35    7.84
  -2 -20  22   28.01   19.26
   2  20  23   -1.79    8.71
   2  20  23    3.82    9.05
  -2  20  23    8.63   12.19
  -2  20  23    3.66    8.83
   2  20  24    5.82    7.02
  -2  20  24   -1.66   11.80
  -2  20  24    3.49    8.74
  -2  20  25   -4.95   14.15
   2  20  25   31.14   10.82
  -2  20  25    9.43   10.30
  -2  20  26   20.50   10.20
   2  20  26   -5.89    9.73
  -2  20  26  -11.79   15.04
  -2  20  27  -10.93   16.21
   2  20  27   -2.03    8.83
  -2  20  27    2.97    7.91
   2  20  28    4.13    9.60
  -2  20  28    2.58   15.10
  -2  21  -7  127.99   15.77
  -2  21  -6    9.52    5.95
  -2  21  -6   -0.02    6.08
  -2  21  -5   77.24   12.89
  -2  21  -5   75.81   11.50
  -2  21  -4   92.44   11.84
  -2  21  -4   92.97   14.79
  -2  21  -3   55.84    9.87
  -2  21  -3   71.00   13.14
  -2  21  -2  116.20   12.99
  -2  21  -2  124.92   16.43
  -2  21  -1   59.95   11.50
  -2  21  -1   43.94    9.34
   2  21   0   -3.49    6.05
  -2  21   0    8.77    7.02
  -2  21   0    5.10    4.80
   2  21   1   56.83   10.93
  -2  21   1  101.35   12.46
  -2  21   1   88.00   15.28
  -2  21   2  101.98   16.30
  -2  21   2   95.08   12.61
   2  21   2  108.93   14.25
   2  21   3   65.21   11.69
  -2  21   3   47.18   12.12
  -2  21   3   46.98    9.26
  -2  21   4   46.70    8.26
  -2  21   4   58.40   12.97
   2  21   4   75.69   13.15
  -2  21   5  113.71   17.20
   2  21   5   69.78   11.90
   2  21   5   85.60   12.93
  -2  21   5  122.92   14.23
  -2  21   6    5.48    5.65
   2  21   6   11.42    7.33
  -2  21   6    6.94    6.84
   2  21   6    2.19    5.76
   2  21   7  121.78   14.82
   2  21   7  134.85   16.80
  -2  21   7  166.68   17.00
  -2  21   8  169.54   22.16
   2  21   8  237.52   20.56
   2  21   8  217.89   20.73
  -2  21   8  147.72   16.83
   2  21   9   35.94    9.88
   2  21   9   25.46    8.27
  -2  21   9    5.71    5.44
  -2  21   9   33.02   10.78
   2  21  10  210.09   20.15
   2  21  10  167.39   18.30
  -2  21  10  159.12   21.74
   2  21  11   47.70   11.27
  -2  21  11   36.40   14.30
  -2  21  11   40.40    9.88
   2  21  11   24.87    9.21
  -2  21  12   27.32   12.72
   2  21  12   51.69   11.57
  -2  21  12   26.97    9.10
   2  21  12   43.18   12.47
   2  21  13   23.15    8.08
   2  21  13   26.17    9.92
  -2  21  13   33.53    9.27
  -2  21  14   16.42   10.74
   2  21  14   23.08    9.85
   2  21  14   43.90   11.84
  -2  21  14   24.81    8.05
  -2  21  15   16.60   13.67
   2  21  15   10.95    7.11
   2  21  15   13.99    6.13
  -2  21  15   10.35    7.30
  -2  21  16   23.65    8.92
  -2  21  16   24.93    9.10
   2  21  16    0.47    8.15
   2  21  16   -6.58    6.84
  -2  21  17   10.59   10.96
   2  21  17   26.53    9.77
   2  21  17   21.26    9.13
  -2  21  17   24.31    8.77
  -2  21  18   29.32   13.78
   2  21  18    8.19    7.42
  -2  21  18   35.43   11.13
   2  21  18   51.71   13.56
  -2  21  19   51.54   17.29
   2  21  19   66.55   13.51
   2  21  19   58.50   12.83
  -2 -21  19   21.91   19.78
  -2  21  19   40.18   11.28
  -2  21  20   25.58   15.00
   2  21  20   16.71    7.34
  -2  21  20   22.36    9.86
   2  21  20   18.47   10.19
   2  21  21   21.38    8.98
  -2  21  21   19.25   11.21
  -2  21  21   27.78   13.79
  -2 -21  21   32.05   22.85
   2  21  21   15.81    8.41
  -2  21  22   -0.55    9.97
  -2  21  22    1.77    8.85
   2  21  22    9.01    9.68
   2  21  22    7.30   10.20
  -2  21  23   13.39   11.15
   2  21  23   11.98   10.09
  -2  21  23    5.89    8.04
   2  21  24   12.83    9.42
  -2  21  24   18.64    9.60
  -2  21  25   -6.05   16.33
   2  21  25   -9.34    9.11
  -2  21  25   -3.52    7.93
  -2  21  26   16.29    9.76
   2  21  26    4.09    7.07
  -2  21  27  -10.50   13.53
   2  21  27    3.49    9.90
  -2  21  27    7.82    8.11
   2  21  28   10.94   11.21
  -2  22  -7   11.85    7.94
  -2  22  -6   33.51   10.03
  -2  22  -5   28.89    8.18
  -2  22  -5   13.57    8.85
  -2  22  -4   31.97    9.51
  -2  22  -4   39.16    9.51
  -2  22  -3   42.07   11.32
  -2  22  -3   52.33   10.11
  -2  22  -2    7.57    6.43
  -2  22  -2    5.01    5.67
  -2  22  -1   31.85   10.14
  -2  22  -1   39.12    8.85
   2  22   0   15.88    6.67
  -2  22   0   10.79    6.67
  -2  22   0    8.41    6.26
  -2  22   1   21.65   10.12
   2  22   1   19.14    7.44
  -2  22   1   16.87    6.29
  -2  22   2    6.65    6.95
   2  22   2    3.54    5.42
  -2  22   2    3.85    5.46
  -2  22   3   40.86    9.36
  -2  22   3   41.60   11.94
   2  22   3   31.18    9.65
  -2  22   4   56.98   13.58
  -2  22   4   69.29   10.98
  -2  22   5   22.91   10.47
  -2  22   5   10.94    6.24
   2  22   5   22.61    8.26
   2  22   5   19.56    9.04
   2  22   6   36.85   10.75
  -2  22   6   52.67   13.80
  -2  22   6   45.62   10.04
   2  22   6   44.56   10.42
  -2  22   7   21.76    9.12
   2  22   7   14.50    7.08
   2  22   7   10.40    7.35
  -2  22   7   14.73    6.79
  -2  22   8   14.15    8.76
  -2  22   8    8.70    7.35
   2  22   8    0.41    7.22
   2  22   8   -7.44    7.00
  -2  22   9  196.46   25.02
   2  22   9  265.64   23.13
  -2  22   9  188.53   19.77
   2  22   9  236.24   21.46
   2  22  10  165.76   18.68
   2  22  10  153.66   18.62
  -2  22  10  246.35   21.60
  -2  22  10  249.98   26.97
  -2  22  11    1.96    9.33
  -2  22  11   -7.85    6.88
   2  22  11    8.54    7.73
   2  22  11    4.57    6.04
  -2  22  12   12.21    7.54
  -2  22  12   32.48   12.26
   2  22  12   20.84    8.48
   2  22  12    5.99    5.91
   2  22  13  -11.94    8.70
   2  22  13    7.50    6.94
  -2  22  13    6.48    7.65
  -2  22  13    2.38    5.33
  -2  22  14    1.47    8.09
   2  22  14   26.42   10.36
   2  22  14   17.07    8.33
  -2  22  14   18.98   11.14
  -2  22  15   24.46   15.32
   2  22  15   14.24    7.78
   2  22  15   15.20    8.66
  -2  22  15    2.14    5.83
  -2  22  16   55.15   16.72
   2  22  16   40.43   11.35
  -2  22  16   27.49    9.38
   2  22  16   42.89   11.37
  -2  22  17   12.75   11.12
   2  22  17    4.83    6.43
   2  22  17    7.92    6.53
  -2  22  17    8.64    7.26
  -2  22  18   -3.81    9.01
   2  22  18   -5.11    6.77
  -2  22  18   19.24    8.69
   2  22  18   15.39    8.76
  -2  22  19    3.05   11.15
  -2  22  19    6.91    7.03
   2  22  19    6.50    9.46
  -2 -22  19    8.31   17.09
   2  22  19   -3.49    8.94
  -2  22  20   17.79   12.37
  -2 -22  20  -13.73   22.30
   2  22  20    1.02    7.14
   2  22  20   -2.09    8.17
  -2  22  20    4.29    7.22
  -2  22  21   27.88   14.19
   2  22  21    6.75    8.12
   2  22  21   23.39   10.05
  -2  22  21   38.99   11.76
  -2  22  22   32.37   12.46
  -2  22  22   43.45   16.41
   2  22  22   20.33    9.68
   2  22  22   13.95    9.23
   2  22  23    7.89    7.58
  -2  22  23    6.19    8.03
  -2  22  24   19.75   14.77
   2  22  24   20.07   10.17
  -2  22  24   -1.55    7.82
   2  22  25   47.30   15.77
  -2  22  25   27.20   16.33
  -2  22  25   34.29   12.91
  -2  22  26    5.11   11.38
   2  22  26    0.92    7.95
   2  22  27   18.55   10.90
  -2  22  27   12.93   12.66
   2  22  28    5.35   10.31
  -2  23  -7   21.03    9.05
  -2  23  -6   -1.82    7.03
  -2  23  -5   90.88   12.72
  -2  23  -5  109.21   16.10
  -2  23  -4   28.52   10.54
  -2  23  -4   25.94    7.62
  -2  23  -3  110.88   16.52
  -2  23  -3  133.11   14.96
  -2  23  -2   56.04   12.52
  -2  23  -2   60.35   10.39
  -2  23  -1  242.33   19.32
  -2  23  -1  251.43   24.11
  -2  23   0    4.70    5.16
  -2  23   0   -3.02    6.64
   2  23   0    3.09    6.94
  -2  23   1  195.08   22.14
   2  23   1  238.12   19.98
  -2  23   2   30.33    8.99
  -2  23   2   36.07   10.78
   2  23   2   50.92   11.04
  -2  23   3   41.53    9.58
  -2  23   3   51.57   13.37
   2  23   3   74.89   12.92
   2  23   4   41.67   11.13
  -2  23   4   23.50   10.08
  -2  23   4   17.06    7.16
  -2  23   5   64.30   14.73
  -2  23   5   67.76   11.87
   2  23   5   88.29   15.11
  -2  23   6    2.09    7.06
   2  23   6   16.26    8.45
   2  23   6   10.45    6.01
  -2  23   6    3.03    5.22
  -2  23   7   36.68    9.52
  -2  23   7   30.86    9.96
   2  23   7   19.75    7.29
   2  23   7   26.89    9.55
  -2  23   8   38.19    9.56
  -2  23   8   30.66   11.33
   2  23   8   43.71   11.24
   2  23   8   55.14   11.87
  -2  23   9   52.80   15.49
  -2  23   9   54.24   11.18
   2  23   9   71.89   13.50
   2  23   9   61.31   10.73
  -2  23  10   14.29    7.50
   2  23  10   -6.38    6.78
   2  23  10   10.28    6.70
  -2  23  11   13.31   11.31
  -2  23  11    9.30    6.77
   2  23  11    7.07    6.25
   2  23  11    9.04    7.30
  -2  23  12   20.96    7.93
   2  23  12   27.78    9.37
   2  23  12   23.99    9.01
  -2  23  13   -2.97    6.84
  -2  23  13    0.97    8.45
   2  23  13   14.13    6.53
   2  23  13    3.75    7.12
   2  23  14   83.18   14.77
  -2  23  14   30.95   10.15
  -2  23  14   56.42   16.67
   2  23  14   48.16   12.09
  -2  23  15    0.76    5.67
   2  23  15    4.69    7.09
  -2  23  15    7.37   11.70
   2  23  15   -3.75    6.91
   2  23  16   31.19   10.43
  -2  23  16    8.73    9.07
  -2  23  16   15.45    9.25
   2  23  16   43.92   13.59
   2  23  17   11.17    8.31
  -2  23  17   11.15   11.65
  -2  23  17   -1.70    6.77
   2  23  17   -2.97    7.23
  -2  23  18   15.48   12.45
  -2  23  18    8.17    6.57
   2  23  18   11.50    9.26
   2  23  18    5.23    7.78
  -2  23  19   21.97   10.43
  -2  23  19    3.82   11.27
   2  23  19    9.32    9.63
   2  23  19   14.95    7.89
  -2  23  20    5.06    6.94
   2  23  20   14.46    9.32
   2  23  20   -1.18    8.26
  -2  23  20    1.64   10.75
  -2  23  21    5.82    8.77
  -2  23  21    0.07    9.92
   2  23  21  -14.92   10.76
   2  23  21    1.56    8.75
  -2  23  22   12.20   10.06
  -2  23  22    3.27   13.02
   2  23  22   18.11   10.58
  -2  23  23   17.62   10.93
  -2  23  23   13.75   13.44
   2  23  23   38.98   13.72
  -2  23  24   -4.72   12.13
  -2  23  24  -18.58   10.12
   2  23  24    3.29    9.57
  -2  23  25    8.48   12.62
   2  23  25   -4.96    9.80
  -2  23  26   28.07   15.81
   2  23  26   18.47   10.73
  -2  24  -7  103.55   15.62
  -2  24  -6   -5.59    7.27
  -2  24  -5   35.56   10.03
  -2  24  -5   25.81    8.22
  -2  24  -4   32.37    8.65
  -2  24  -4   41.09   10.80
  -2  24  -3    3.38    6.74
  -2  24  -3   -0.94    6.46
  -2  24  -2   22.90    8.64
  -2  24  -2   45.22    9.91
  -2  24  -1   12.95    8.44
  -2  24  -1   18.28    6.01
  -2  24   0   41.28   11.86
   2  24   0   35.55    9.46
  -2  24   0   22.14    7.96
  -2  24   1    7.85    5.97
  -2  24   1   18.99    8.78
   2  24   1   14.57    7.95
   2  24   2   24.33    9.00
  -2  24   2   42.39   11.76
  -2  24   2   34.50    8.81
  -2  24   3    1.46    7.01
   2  24   3   -0.54    7.03
  -2  24   3    1.40    5.29
  -2  24   4   14.64    8.72
  -2  24   4   13.63    8.01
   2  24   4   33.84   10.27
   2  24   5   39.23   10.17
  -2  24   5   40.29    9.52
  -2  24   5   56.33   14.83
   2  24   6    3.69    6.31
  -2  24   6   -0.75    7.65
  -2  24   6    6.78    6.43
   2  24   6    7.28    9.41
   2  24   7   99.56   15.71
  -2  24   7   77.19   15.53
   2  24   7  120.47   16.92
  -2  24   7   82.93   13.03
  -2  24   8    6.09    7.76
  -2  24   8   10.61    6.26
   2  24   8   10.53    7.33
   2  24   8   18.34    7.95
   2  24   9   16.25    6.98
  -2  24   9   17.31   10.50
  -2  24   9   -2.66    7.81
   2  24   9   11.02    6.98
  -2  24  10   16.25    8.47
   2  24  10   -2.88    7.08
  -2  24  10   18.09    8.67
   2  24  10   16.85   10.52
  -2  24  11    1.85    7.45
  -2  24  11   -5.47    8.94
   2  24  11    5.81    7.53
   2  24  11    0.16    5.94
  -2  24  12   16.55    8.39
  -2  24  12    4.84    8.26
   2  24  12   22.38    9.33
  -2  24  13   18.24    8.84
  -2  24  13   13.03   10.54
   2  24  13   20.12    9.60
   2  24  13   21.22    9.79
  -2  24  14   11.69    8.79
  -2  24  14  -25.30   12.51
   2  24  14   -3.19    8.15
   2  24  14  -17.89    9.73
  -2  24  15    7.02    8.49
  -2  24  15   -6.22   11.51
   2  24  15   -0.54    7.31
   2  24  15   12.15    7.30
  -2  24  16   28.30    9.72
  -2  24  16   15.06   10.85
   2  24  16    4.70    6.73
   2  24  16    3.96    8.87
   2  24  17    5.80    6.52
  -2  24  17   -2.91    7.10
   2  24  17   -1.51    9.19
   2  24  18    0.58    8.14
  -2  24  18    9.26    7.59
   2  24  18   -6.93    7.97
  -2  24  19   11.83    7.24
   2  24  19   25.21    9.92
  -2  24  19   35.06   13.59
   2  24  19   29.99   11.32
  -2  24  20   11.83   15.34
   2  24  20    7.59    8.77
   2  24  20   12.07   10.12
  -2  24  20   15.03    8.54
   2  24  21    0.04    8.31
  -2  24  21   24.10   10.95
   2  24  21    1.28    8.24
   2  24  22   18.51   10.94
  -2  24  22   12.81   10.51
  -2  24  22   32.64   18.31
   2  24  23   -0.40    8.71
  -2  24  23    5.66   13.13
  -2  24  23    6.97    8.36
  -2  24  24   56.81   20.00
   2  24  24   10.07   10.16
   2  24  25   25.10   12.82
  -2  24  25    6.54   12.87
  -2  25  -7   15.14    9.30
  -2  25  -6   21.39   10.66
  -2  25  -5   80.36   14.87
  -2  25  -4   13.86    6.84
  -2  25  -4   18.18   10.02
  -2  25  -3   27.12   10.36
  -2  25  -3   26.37    9.88
  -2  25  -2   49.63   12.35
  -2  25  -2   30.11    8.62
  -2  25  -1    4.95    5.12
  -2  25  -1    5.26    6.54
  -2  25   0    2.85    7.21
   2  25   0    3.44    7.37
  -2  25   0    9.32    6.92
  -2  25   1   24.02    9.57
  -2  25   1   24.52    7.86
   2  25   1   16.06    7.20
  -2  25   2   45.73   13.85
   2  25   2   20.79    8.37
  -2  25   2   34.38    9.40
   2  25   3   21.62    8.11
  -2  25   3   31.51   12.02
  -2  25   3   25.76    8.26
  -2  25   4    9.95    8.25
   2  25   4   21.23   10.19
  -2  25   4   26.56    8.00
   2  25   5   64.32   13.07
  -2  25   5   94.95   17.69
  -2  25   5   67.54   12.40
[truncated: 724,646 more chars]
