# Supplementary material for: The dipolar endofullerene HF@C60
Source: Springer Nature journal article supplement (doi:10.1038/nchem.2563), 2016-07-11
Supplement: 41557_2016_BFnchem2563_MOESM49_ESM.mol [file 41557_2016_BFnchem2563_MOESM49_ESM.mol]

NChem.2563-compHF@C60.mol
  ChemDraw06141613472D

 61 90  0  0  0  0  0  0  0  0999 V2000
   -0.3928   -0.0925    0.0000 C   0  0  0  0  0  0  0  0  0  0  0  0
    0.4321   -0.0991    0.0000 C   0  0  0  0  0  0  0  0  0  0  0  0
    0.6933    0.6834    0.0000 C   0  0  0  0  0  0  0  0  0  0  0  0
    0.0298    1.1735    0.0000 C   0  0  0  0  0  0  0  0  0  0  0  0
   -0.6414    0.6942    0.0000 C   0  0  0  0  0  0  0  0  0  0  0  0
    0.9117   -0.7703    0.0000 C   0  0  0  0  0  0  0  0  0  0  0  0
    1.4801    0.9320    0.0000 C   0  0  0  0  0  0  0  0  0  0  0  0
   -0.8828   -0.7560    0.0000 C   0  0  0  0  0  0  0  0  0  0  0  0
   -1.4237    0.9554    0.0000 C   0  0  0  0  0  0  0  0  0  0  0  0
    0.0367    1.9984    0.0000 C   0  0  0  0  0  0  0  0  0  0  0  0
    0.4214   -1.4339    0.0000 C   0  0  0  0  0  0  0  0  0  0  0  0
   -0.4033   -1.4273    0.0000 C   0  0  0  0  0  0  0  0  0  0  0  0
    1.6984   -0.5218    0.0000 C   0  0  0  0  0  0  0  0  0  0  0  0
    1.9596    0.2608    0.0000 C   0  0  0  0  0  0  0  0  0  0  0  0
    1.4867    1.7570    0.0000 C   0  0  0  0  0  0  0  0  0  0  0  0
    0.8231    2.2470    0.0000 C   0  0  0  0  0  0  0  0  0  0  0  0
   -0.7459    2.2596    0.0000 C   0  0  0  0  0  0  0  0  0  0  0  0
   -1.4171    1.7800    0.0000 C   0  0  0  0  0  0  0  0  0  0  0  0
   -1.6654   -0.4948    0.0000 C   0  0  0  0  0  0  0  0  0  0  0  0
   -1.9140    0.2919    0.0000 C   0  0  0  0  0  0  0  0  0  0  0  0
    2.0520   -1.2477    0.0000 C   0  0  0  0  0  0  0  0  0  0  0  0
    2.8065   -0.9172    0.0000 C   0  0  0  0  0  0  0  0  0  0  0  0
    3.0678   -0.1346    0.0000 C   0  0  0  0  0  0  0  0  0  0  0  0
    2.6330    0.7844    0.0000 C   0  0  0  0  0  0  0  0  0  0  0  0
   -1.0126   -1.9442    0.0000 C   0  0  0  0  0  0  0  0  0  0  0  0
   -0.4129   -2.6085    0.0000 C   0  0  0  0  0  0  0  0  0  0  0  0
    0.4120   -2.6151    0.0000 C   0  0  0  0  0  0  0  0  0  0  0  0
    0.9944   -2.0154    0.0000 C   0  0  0  0  0  0  0  0  0  0  0  0
   -2.5802    0.6887    0.0000 C   0  0  0  0  0  0  0  0  0  0  0  0
   -3.0554   -0.0032    0.0000 C   0  0  0  0  0  0  0  0  0  0  0  0
   -2.8065   -0.7896    0.0000 C   0  0  0  0  0  0  0  0  0  0  0  0
   -1.9175   -1.2664    0.0000 C   0  0  0  0  0  0  0  0  0  0  0  0
   -0.8256    3.0807    0.0000 C   0  0  0  0  0  0  0  0  0  0  0  0
   -1.3857    3.2008    0.0000 C   0  0  0  0  0  0  0  0  0  0  0  0
   -2.0569    2.7213    0.0000 C   0  0  0  0  0  0  0  0  0  0  0  0
   -2.1702    1.8469    0.0000 C   0  0  0  0  0  0  0  0  0  0  0  0
    2.2965    1.9208    0.0000 C   0  0  0  0  0  0  0  0  0  0  0  0
    2.1691    2.7150    0.0000 C   0  0  0  0  0  0  0  0  0  0  0  0
    1.5056    3.2050    0.0000 C   0  0  0  0  0  0  0  0  0  0  0  0
    0.9161    3.0667    0.0000 C   0  0  0  0  0  0  0  0  0  0  0  0
    2.8404    3.2050    0.0000 C   0  0  0  0  0  0  0  0  0  0  0  0
    2.5918    3.9917    0.0000 C   0  0  0  0  0  0  0  0  0  0  0  0
    1.7669    3.9917    0.0000 C   0  0  0  0  0  0  0  0  0  0  0  0
    3.4700   -1.4075    0.0000 C   0  0  0  0  0  0  0  0  0  0  0  0
    4.1413   -0.9172    0.0000 C   0  0  0  0  0  0  0  0  0  0  0  0
    3.8927   -0.1346    0.0000 C   0  0  0  0  0  0  0  0  0  0  0  0
   -0.6741   -3.3909    0.0000 C   0  0  0  0  0  0  0  0  0  0  0  0
   -0.0106   -3.8811    0.0000 C   0  0  0  0  0  0  0  0  0  0  0  0
    0.6606   -3.3909    0.0000 C   0  0  0  0  0  0  0  0  0  0  0  0
   -3.8803   -0.0032    0.0000 C   0  0  0  0  0  0  0  0  0  0  0  0
   -4.1413   -0.7896    0.0000 C   0  0  0  0  0  0  0  0  0  0  0  0
   -3.4780   -1.2799    0.0000 C   0  0  0  0  0  0  0  0  0  0  0  0
   -1.6343    3.9873    0.0000 C   0  0  0  0  0  0  0  0  0  0  0  0
   -2.4592    3.9873    0.0000 C   0  0  0  0  0  0  0  0  0  0  0  0
   -2.7205    3.2008    0.0000 C   0  0  0  0  0  0  0  0  0  0  0  0
   -2.8717    4.7017    0.0000 C   0  0  0  0  0  0  0  0  0  0  0  0
    3.0042    4.7061    0.0000 C   0  0  0  0  0  0  0  0  0  0  0  0
    4.9381   -1.1308    0.0000 C   0  0  0  0  0  0  0  0  0  0  0  0
   -0.0106   -4.7061    0.0000 C   0  0  0  0  0  0  0  0  0  0  0  0
   -4.9381   -1.0032    0.0000 C   0  0  0  0  0  0  0  0  0  0  0  0
   -0.1217   -0.8308    0.0000 F   0  0  0  0  0  0  0  0  0  0  0  0
  1  2  1  0      
  2  3  1  0      
  3  4  1  0      
  4  5  1  0      
  5  1  1  0      
  2  6  2  0      
  3  7  2  0      
  1  8  2  0      
  5  9  2  0      
  4 10  2  0      
  6 11  1  0      
  8 12  1  0      
 11 12  2  0      
  6 13  1  0      
  7 14  1  0      
 14 13  2  0      
  7 15  1  0      
 15 16  2  0      
 16 10  1  0      
 10 17  1  0      
 17 18  2  0      
 18  9  1  0      
  8 19  1  0      
  9 20  1  0      
 20 19  2  0      
 13 21  1  0      
 21 22  2  0      
 22 23  1  0      
 23 24  2  0      
 24 14  1  0      
 12 25  1  0      
 25 26  2  0      
 26 27  1  0      
 27 28  2  0      
 28 11  1  0      
 20 29  1  0      
 29 30  2  0      
 30 31  1  0      
 31 32  2  0      
 32 19  1  0      
 17 33  1  0      
 33 34  2  0      
 34 35  1  0      
 35 36  2  0      
 36 18  1  0      
 15 37  1  0      
 37 38  2  0      
 38 39  1  0      
 39 40  2  0      
 40 16  1  0      
 37 24  1  0      
 21 28  1  0      
 25 32  1  0      
 29 36  1  0      
 40 33  1  0      
 38 41  1  0      
 41 42  1  0      
 42 43  1  0      
 43 39  1  0      
 22 44  1  0      
 44 45  1  0      
 45 46  1  0      
 46 23  1  0      
 26 47  1  0      
 47 48  1  0      
 48 49  1  0      
 49 27  1  0      
 30 50  1  0      
 50 51  1  0      
 51 52  1  0      
 52 31  1  0      
 34 53  1  0      
 53 54  1  0      
 54 55  1  0      
 55 35  1  0      
 53 43  2  0      
 41 46  2  0      
 44 49  2  0      
 47 52  2  0      
 50 55  2  0      
 54 56  2  0      
 42 57  2  0      
 45 58  2  0      
 48 59  2  0      
 51 60  2  0      
 60 59  1  0      
 59 58  1  0      
 58 57  1  0      
 56 57  1  0      
 56 60  1  0      
M  END
